# Supplementary material for: Synthesis and characterization of crystalline niobium and tantalum carbonyl complexes at room temperature
Source: Springer Nature journal article supplement (doi:10.1038/s41557-020-0487-3), 2020-06-22
Supplement: 41557_2020_487_MOESM1_ESM.cif [file 41557_2020_487_MOESM1_ESM.cif]

 
data_IK_WU18_2_0m_final

_vrf_PLAT034_IK_WU18_2_0m_final
;
PROBLEM: No Flack Parameter Given. Z > Si, NonCentro ....     Please Do !  
RESPONSE: The crystal turned out to be twinned 
		by pseudo merohery with a twin law of
        -1 0 0 0 0 1 0 1 0 with 9%. Additionally, 
		one of the twin components is partially 
		twinned by inversion with 94%.
;
 
_audit_creation_method            'SHELXL-2018/3'
_shelx_SHELXL_version_number      '2018/3'
_chemical_name_systematic         ?
_chemical_name_common             ?
_chemical_melting_point           ?
_chemical_formula_moiety          ?
_chemical_formula_sum
 'C23 Al F36 Nb O11' 
_chemical_formula_weight          1256.12


loop_
 _atom_type_symbol
 _atom_type_description
 _atom_type_scat_dispersion_real
 _atom_type_scat_dispersion_imag
 _atom_type_scat_source
 'C'  'C'   0.0033   0.0016
 'International Tables Vol C Tables 4.2.6.8 and 6.1.1.4'
 'O'  'O'   0.0106   0.0060
 'International Tables Vol C Tables 4.2.6.8 and 6.1.1.4'
 'F'  'F'   0.0171   0.0103
 'International Tables Vol C Tables 4.2.6.8 and 6.1.1.4'
 'Al'  'Al'   0.0645   0.0514
 'International Tables Vol C Tables 4.2.6.8 and 6.1.1.4'
 'Nb'  'Nb'  -2.0727   0.6215
 'International Tables Vol C Tables 4.2.6.8 and 6.1.1.4'
 
_space_group_crystal_system       orthorhombic
_space_group_IT_number            20
_space_group_name_H-M_alt         'C 2 2 21'
_space_group_name_Hall            'C 2c 2'
 
_shelx_space_group_comment
;
The symmetry employed for this shelxl refinement is uniquely defined
by the following loop, which should always be used as a source of
symmetry information in preference to the above space-group names.
They are only intended as comments.
;
 
loop_
 _space_group_symop_operation_xyz
 'x, y, z'
 '-x, -y, z+1/2'
 '-x, y, -z+1/2'
 'x, -y, -z'
 'x+1/2, y+1/2, z'
 '-x+1/2, -y+1/2, z+1/2'
 '-x+1/2, y+1/2, -z+1/2'
 'x+1/2, -y+1/2, -z'
 
_cell_length_a                    9.3829(6)
_cell_length_b                    20.0929(13)
_cell_length_c                    20.1106(13)
_cell_angle_alpha                 90
_cell_angle_beta                  90
_cell_angle_gamma                 90
_cell_volume                      3791.4(4)
_cell_formula_units_Z             4
_cell_measurement_temperature     100(2)
_cell_measurement_reflns_used     9823
_cell_measurement_theta_min       4.532
_cell_measurement_theta_max       52.819
 
_exptl_crystal_description        block
_exptl_crystal_colour             red
_exptl_crystal_density_meas       ?
_exptl_crystal_density_method     ?
_exptl_crystal_density_diffrn     2.201          
_exptl_crystal_F_000              2416
_exptl_transmission_factor_min    ?
_exptl_transmission_factor_max    ?
_exptl_crystal_size_max           0.100
_exptl_crystal_size_mid           0.080
_exptl_crystal_size_min           0.020
_exptl_absorpt_coefficient_mu     0.573
_shelx_estimated_absorpt_T_min    0.945
_shelx_estimated_absorpt_T_max    0.989
_exptl_absorpt_correction_type   multi-scan
_exptl_absorpt_correction_T_min  0.7102
_exptl_absorpt_correction_T_max  0.7454
_exptl_absorpt_process_details
;
 SADABS 2016/2: Krause, L., Herbst-Irmer, R., Sheldrick G.M. & Stalke D.,
 J. Appl. Cryst. 48 (2015) 3-10
;
_exptl_absorpt_special_details    ?
_diffrn_ambient_temperature       100(2)
_diffrn_radiation_wavelength      0.71073
_diffrn_radiation_type            MoK\a
_diffrn_source                    'INCOATEC Mo Microsource'
_diffrn_measurement_device_type   'Bruker Smart Apex II Quazar'
_diffrn_measurement_method        'omega and phi scans'
_diffrn_detector_area_resol_mean  ?
_diffrn_reflns_number             46351
_diffrn_reflns_av_unetI/netI      0.0106
_diffrn_reflns_av_R_equivalents   0.0211
_diffrn_reflns_limit_h_min        -11
_diffrn_reflns_limit_h_max        10
_diffrn_reflns_limit_k_min        -25
_diffrn_reflns_limit_k_max        25
_diffrn_reflns_limit_l_min        -25
_diffrn_reflns_limit_l_max        22
_diffrn_reflns_theta_min          1.012
_diffrn_reflns_theta_max          26.435
_diffrn_reflns_theta_full         25.242
_diffrn_measured_fraction_theta_max   0.996
_diffrn_measured_fraction_theta_full  1.000
_diffrn_reflns_Laue_measured_fraction_max    0.996
_diffrn_reflns_Laue_measured_fraction_full   1.000
_diffrn_reflns_point_group_measured_fraction_max   0.995
_diffrn_reflns_point_group_measured_fraction_full  1.000
_reflns_number_total              3895
_reflns_number_gt                 3874
_reflns_threshold_expression      'I > 2\s(I)'
_reflns_Friedel_coverage          0.787
_reflns_Friedel_fraction_max      0.995
_reflns_Friedel_fraction_full     1.000
 
_reflns_special_details
;
 Reflections were merged by SHELXL according to the crystal
 class for the calculation of statistics and refinement.
 
 _reflns_Friedel_fraction is defined as the number of unique
 Friedel pairs measured divided by the number that would be
 possible theoretically, ignoring centric projections and
 systematic absences. Completness statistics refer to single and
 composite reflections containing twin component 1 only.
;
 
_computing_data_collection        'Apex2 v2013.6-2'
_computing_cell_refinement        'SAINT V8.34A'
_computing_data_reduction         'SAINT V8.34A'
_computing_structure_solution     'SHELXT 2018/2 (Sheldrick, 2018)'
_computing_structure_refinement   'SHELXL-2018/3 (Sheldrick, 2018)'
_computing_molecular_graphics     'OLEX2 v1.2'
_computing_publication_material   'ShelXle-915'
_refine_special_details
;
 Refined as a 4-component inversion twin.
;
_refine_ls_structure_factor_coef  Fsqd
_refine_ls_matrix_type            full
_refine_ls_weighting_scheme       calc
_refine_ls_weighting_details
'w=1/[\s^2^(Fo^2^)+(0.0219P)^2^+1.9627P] where P=(Fo^2^+2Fc^2^)/3'
_atom_sites_solution_primary      ?
_atom_sites_solution_secondary    ?
_atom_sites_solution_hydrogens    .
_refine_ls_hydrogen_treatment     undef
_refine_ls_extinction_method      none
_refine_ls_extinction_coef        .
_refine_ls_abs_structure_details
;
 Twinning involves inversion, so Flack parameter cannot be determined
;
_refine_ls_abs_structure_Flack    ?
_chemical_absolute_configuration  ?
_refine_ls_number_reflns          3895
_refine_ls_number_parameters      330
_refine_ls_number_restraints      0
_refine_ls_R_factor_all           0.0155
_refine_ls_R_factor_gt            0.0154
_refine_ls_wR_factor_ref          0.0406
_refine_ls_wR_factor_gt           0.0405
_refine_ls_goodness_of_fit_ref    1.081
_refine_ls_restrained_S_all       1.081
_refine_ls_shift/su_max           0.000
_refine_ls_shift/su_mean          0.000
 
loop_
 _atom_site_label
 _atom_site_type_symbol
 _atom_site_fract_x
 _atom_site_fract_y
 _atom_site_fract_z
 _atom_site_U_iso_or_equiv
 _atom_site_adp_type
 _atom_site_occupancy
 _atom_site_site_symmetry_order  
 _atom_site_calc_flag
 _atom_site_refinement_flags_posn
 _atom_site_refinement_flags_adp
 _atom_site_refinement_flags_occupancy
 _atom_site_disorder_assembly
 _atom_site_disorder_group
O1_2 O 0.34371(16) 0.55829(8) 0.45772(7) 0.0161(3) Uani 1 1 d . . . . .
C1_2 C 0.4170(2) 0.57162(10) 0.40154(10) 0.0159(4) Uani 1 1 d . . . . .
C2_2 C 0.4779(3) 0.64369(11) 0.40754(11) 0.0219(5) Uani 1 1 d . . . . .
F1_2 F 0.37482(18) 0.68831(7) 0.39790(7) 0.0305(3) Uani 1 1 d . . . . .
F2_2 F 0.58038(16) 0.65547(7) 0.36253(7) 0.0289(3) Uani 1 1 d . . . . .
F3_2 F 0.53157(16) 0.65411(7) 0.46751(7) 0.0312(4) Uani 1 1 d . . . . .
C3_2 C 0.5429(2) 0.52211(11) 0.39233(11) 0.0191(5) Uani 1 1 d . . . . .
F4_2 F 0.49958(18) 0.46026(6) 0.40432(6) 0.0254(3) Uani 1 1 d . . . . .
F5_2 F 0.64743(15) 0.53585(8) 0.43463(7) 0.0291(3) Uani 1 1 d . . . . .
F6_2 F 0.59707(15) 0.52354(7) 0.33075(6) 0.0236(3) Uani 1 1 d . . . . .
C4_2 C 0.3186(2) 0.56873(12) 0.33908(10) 0.0200(4) Uani 1 1 d . . . . .
F7_2 F 0.29987(16) 0.50654(7) 0.31829(7) 0.0270(3) Uani 1 1 d . . . . .
F8_2 F 0.37029(16) 0.60367(7) 0.28763(6) 0.0262(3) Uani 1 1 d . . . . .
F9_2 F 0.19010(15) 0.59325(8) 0.35300(7) 0.0310(3) Uani 1 1 d . . . . .
O1_1 O 0.14242(17) 0.45802(7) 0.44109(7) 0.0170(3) Uani 1 1 d . . . . .
C1_1 C 0.0708(2) 0.40175(10) 0.42605(10) 0.0172(4) Uani 1 1 d . . . . .
C2_1 C -0.0489(3) 0.38779(13) 0.47757(12) 0.0261(5) Uani 1 1 d . . . . .
F1_1 F 0.0009(2) 0.39685(7) 0.53915(6) 0.0348(3) Uani 1 1 d . . . . .
F2_1 F -0.09962(17) 0.32595(8) 0.47419(8) 0.0351(4) Uani 1 1 d . . . . .
F3_1 F -0.15686(16) 0.42955(9) 0.46906(9) 0.0428(4) Uani 1 1 d . . . . .
C3_1 C 0.0015(3) 0.41152(11) 0.35604(11) 0.0278(5) Uani 1 1 d . . . . .
F4_1 F 0.0977(2) 0.40350(8) 0.30793(7) 0.0385(4) Uani 1 1 d . . . . .
F5_1 F -0.0529(2) 0.47180(8) 0.34990(9) 0.0428(4) Uani 1 1 d . . . . .
F6_1 F -0.10402(18) 0.36775(8) 0.34483(8) 0.0382(4) Uani 1 1 d . . . . .
C4_1 C 0.1730(3) 0.34110(11) 0.42280(12) 0.0229(5) Uani 1 1 d . . . . .
F7_1 F 0.29506(17) 0.35762(7) 0.39315(8) 0.0353(4) Uani 1 1 d . . . . .
F8_1 F 0.11769(18) 0.29022(7) 0.38885(7) 0.0322(3) Uani 1 1 d . . . . .
F9_1 F 0.20517(17) 0.31911(7) 0.48339(8) 0.0326(3) Uani 1 1 d . . . . .
Al1 Al 0.24273(9) 0.500000 0.500000 0.01221(17) Uani 1 2 d S T P . .
O1 O 0.500000 0.40900(14) 0.250000 0.0673(11) Uani 1 2 d S T P . .
C1 C 0.500000 0.35405(18) 0.250000 0.0398(9) Uani 1 2 d S T P . .
Nb1 Nb 0.500000 0.24110(2) 0.250000 0.01631(7) Uani 1 2 d S T P . .
C2 C 0.2679(2) 0.25043(10) 0.24670(12) 0.0228(4) Uani 1 1 d . . . . .
O2 O 0.14861(17) 0.25526(8) 0.24375(10) 0.0322(4) Uani 1 1 d . . . . .
C3 C 0.5459(3) 0.25387(12) 0.35685(12) 0.0278(5) Uani 1 1 d . . . . .
O3 O 0.5723(2) 0.26200(11) 0.41036(9) 0.0429(5) Uani 1 1 d . . . . .
C4 C 0.4168(2) 0.15453(13) 0.29704(12) 0.0255(5) Uani 1 1 d . . . . .
O4 O 0.3706(2) 0.10976(10) 0.32274(11) 0.0389(5) Uani 1 1 d . . . . .
 
loop_
 _atom_site_aniso_label
 _atom_site_aniso_U_11
 _atom_site_aniso_U_22
 _atom_site_aniso_U_33
 _atom_site_aniso_U_23
 _atom_site_aniso_U_13
 _atom_site_aniso_U_12
O1_2 0.0200(7) 0.0157(8) 0.0126(7) 0.0015(6) 0.0027(6) -0.0031(6)
C1_2 0.0205(11) 0.0138(10) 0.0134(9) 0.0017(8) 0.0019(8) -0.0012(8)
C2_2 0.0292(14) 0.0153(10) 0.0214(10) 0.0002(8) 0.0080(9) -0.0045(10)
F1_2 0.0434(9) 0.0162(7) 0.0319(7) 0.0038(6) 0.0119(7) 0.0063(6)
F2_2 0.0346(8) 0.0214(7) 0.0308(7) -0.0008(6) 0.0142(6) -0.0098(6)
F3_2 0.0415(10) 0.0270(7) 0.0252(7) -0.0069(6) 0.0023(6) -0.0151(6)
C3_2 0.0194(11) 0.0198(11) 0.0179(10) 0.0030(8) 0.0002(8) -0.0021(8)
F4_2 0.0303(6) 0.0150(6) 0.0307(6) 0.0038(5) 0.0049(7) 0.0016(7)
F5_2 0.0214(7) 0.0374(9) 0.0286(7) 0.0010(7) -0.0078(6) 0.0005(6)
F6_2 0.0250(7) 0.0236(7) 0.0222(7) 0.0002(5) 0.0069(5) 0.0019(6)
C4_2 0.0211(11) 0.0244(11) 0.0145(10) 0.0030(9) 0.0023(8) 0.0020(9)
F7_2 0.0299(7) 0.0317(8) 0.0194(7) -0.0045(6) -0.0032(6) -0.0094(6)
F8_2 0.0289(7) 0.0329(8) 0.0167(7) 0.0086(6) 0.0030(5) 0.0013(6)
F9_2 0.0209(7) 0.0491(10) 0.0229(7) 0.0058(6) -0.0002(6) 0.0097(7)
O1_1 0.0215(8) 0.0135(7) 0.0160(7) -0.0024(6) -0.0042(6) -0.0023(6)
C1_1 0.0203(11) 0.0156(10) 0.0157(10) -0.0040(8) -0.0016(8) -0.0033(8)
C2_1 0.0236(11) 0.0281(13) 0.0265(12) -0.0061(10) 0.0024(9) -0.0050(10)
F1_1 0.0431(8) 0.0438(8) 0.0176(6) -0.0063(5) 0.0075(7) -0.0143(10)
F2_1 0.0363(9) 0.0339(8) 0.0350(8) -0.0039(7) 0.0077(7) -0.0174(7)
F3_1 0.0237(8) 0.0474(10) 0.0573(11) -0.0118(9) 0.0075(8) 0.0055(7)
C3_1 0.0387(13) 0.0224(10) 0.0223(10) -0.0020(8) -0.0111(13) -0.0052(13)
F4_1 0.0616(11) 0.0383(9) 0.0156(7) -0.0028(6) -0.0004(7) -0.0178(8)
F5_1 0.0556(10) 0.0297(8) 0.0431(9) 0.0035(7) -0.0293(8) 0.0011(7)
F6_1 0.0437(9) 0.0372(9) 0.0338(8) -0.0033(7) -0.0176(7) -0.0167(8)
C4_1 0.0271(12) 0.0153(11) 0.0264(12) -0.0031(9) 0.0035(10) -0.0029(9)
F7_1 0.0286(7) 0.0241(8) 0.0534(10) -0.0047(7) 0.0159(7) 0.0005(6)
F8_1 0.0454(9) 0.0166(7) 0.0345(8) -0.0100(6) 0.0033(7) -0.0053(7)
F9_1 0.0411(9) 0.0204(7) 0.0363(8) 0.0051(6) -0.0104(7) 0.0019(7)
Al1 0.0150(4) 0.0120(4) 0.0096(4) -0.0008(3) 0.000 0.000
O1 0.132(3) 0.0184(14) 0.0515(18) 0.000 -0.026(3) 0.000
C1 0.064(3) 0.0247(18) 0.0309(17) 0.000 -0.019(2) 0.000
Nb1 0.01898(12) 0.01490(12) 0.01504(12) 0.000 -0.00025(11) 0.000
C2 0.0284(10) 0.0194(11) 0.0206(10) 0.0002(11) -0.0012(9) 0.0030(8)
O2 0.0246(8) 0.0361(10) 0.0359(9) 0.0024(9) -0.0018(8) 0.0065(7)
C3 0.0321(12) 0.0258(13) 0.0255(11) -0.0016(9) -0.0032(9) 0.0078(10)
O3 0.0565(13) 0.0477(12) 0.0243(9) -0.0078(9) -0.0103(9) 0.0147(11)
C4 0.0168(11) 0.0317(14) 0.0280(12) 0.0085(10) -0.0033(10) 0.0001(10)
O4 0.0259(10) 0.0418(12) 0.0490(12) 0.0247(10) -0.0064(9) -0.0086(9)
 
_geom_special_details
;
 All esds (except the esd in the dihedral angle between two l.s. planes)
 are estimated using the full covariance matrix.  The cell esds are taken
 into account individually in the estimation of esds in distances, angles
 and torsion angles; correlations between esds in cell parameters are only
 used when they are defined by crystal symmetry.  An approximate (isotropic)
 treatment of cell esds is used for estimating esds involving l.s. planes.
;
 
loop_
 _geom_bond_atom_site_label_1
 _geom_bond_atom_site_label_2
 _geom_bond_distance
 _geom_bond_site_symmetry_2
 _geom_bond_publ_flag
O1_2 C1_2 1.350(2) . ?
O1_2 Al1 1.7299(15) . ?
C1_2 C3_2 1.556(3) . ?
C1_2 C4_2 1.560(3) . ?
C1_2 C2_2 1.562(3) . ?
C2_2 F3_2 1.323(3) . ?
C2_2 F1_2 1.333(3) . ?
C2_2 F2_2 1.341(3) . ?
C3_2 F5_2 1.327(3) . ?
C3_2 F4_2 1.330(3) . ?
C3_2 F6_2 1.339(2) . ?
C4_2 F7_2 1.329(3) . ?
C4_2 F9_2 1.332(3) . ?
C4_2 F8_2 1.341(3) . ?
O1_1 C1_1 1.350(3) . ?
O1_1 Al1 1.7322(15) . ?
C1_1 C4_1 1.552(3) . ?
C1_1 C2_1 1.554(3) . ?
C1_1 C3_1 1.563(3) . ?
C2_1 F3_1 1.326(3) . ?
C2_1 F2_1 1.332(3) . ?
C2_1 F1_1 1.336(3) . ?
C3_1 F5_1 1.320(3) . ?
C3_1 F4_1 1.333(3) . ?
C3_1 F6_1 1.344(3) . ?
C4_1 F9_1 1.331(3) . ?
C4_1 F7_1 1.333(3) . ?
C4_1 F8_1 1.334(3) . ?
O1 C1 1.104(4) . ?
C1 Nb1 2.269(4) . ?
Nb1 C4 2.128(2) 3_655 ?
Nb1 C4 2.128(2) . ?
Nb1 C2 2.187(2) . ?
Nb1 C2 2.187(2) 3_655 ?
Nb1 C3 2.206(2) 3_655 ?
Nb1 C3 2.206(2) . ?
C2 O2 1.125(3) . ?
C3 O3 1.116(3) . ?
C4 O4 1.124(3) . ?
 
loop_
 _geom_angle_atom_site_label_1
 _geom_angle_atom_site_label_2
 _geom_angle_atom_site_label_3
 _geom_angle
 _geom_angle_site_symmetry_1
 _geom_angle_site_symmetry_3
 _geom_angle_publ_flag
C1_2 O1_2 Al1 145.58(14) . . ?
O1_2 C1_2 C3_2 111.09(17) . . ?
O1_2 C1_2 C4_2 111.42(17) . . ?
C3_2 C1_2 C4_2 109.25(17) . . ?
O1_2 C1_2 C2_2 107.81(17) . . ?
C3_2 C1_2 C2_2 108.92(17) . . ?
C4_2 C1_2 C2_2 108.27(17) . . ?
F3_2 C2_2 F1_2 107.59(18) . . ?
F3_2 C2_2 F2_2 108.34(19) . . ?
F1_2 C2_2 F2_2 107.66(18) . . ?
F3_2 C2_2 C1_2 110.87(17) . . ?
F1_2 C2_2 C1_2 110.27(19) . . ?
F2_2 C2_2 C1_2 111.95(17) . . ?
F5_2 C3_2 F4_2 107.71(18) . . ?
F5_2 C3_2 F6_2 107.93(18) . . ?
F4_2 C3_2 F6_2 107.69(18) . . ?
F5_2 C3_2 C1_2 110.60(18) . . ?
F4_2 C3_2 C1_2 110.12(18) . . ?
F6_2 C3_2 C1_2 112.62(17) . . ?
F7_2 C4_2 F9_2 107.09(19) . . ?
F7_2 C4_2 F8_2 107.29(17) . . ?
F9_2 C4_2 F8_2 107.21(18) . . ?
F7_2 C4_2 C1_2 111.50(18) . . ?
F9_2 C4_2 C1_2 110.65(17) . . ?
F8_2 C4_2 C1_2 112.82(19) . . ?
C1_1 O1_1 Al1 146.28(14) . . ?
O1_1 C1_1 C4_1 111.09(18) . . ?
O1_1 C1_1 C2_1 111.21(18) . . ?
C4_1 C1_1 C2_1 109.44(19) . . ?
O1_1 C1_1 C3_1 107.68(18) . . ?
C4_1 C1_1 C3_1 108.52(18) . . ?
C2_1 C1_1 C3_1 108.8(2) . . ?
F3_1 C2_1 F2_1 108.1(2) . . ?
F3_1 C2_1 F1_1 107.5(2) . . ?
F2_1 C2_1 F1_1 107.4(2) . . ?
F3_1 C2_1 C1_1 110.6(2) . . ?
F2_1 C2_1 C1_1 113.1(2) . . ?
F1_1 C2_1 C1_1 109.91(19) . . ?
F5_1 C3_1 F4_1 107.8(2) . . ?
F5_1 C3_1 F6_1 107.4(2) . . ?
F4_1 C3_1 F6_1 107.35(18) . . ?
F5_1 C3_1 C1_1 111.12(18) . . ?
F4_1 C3_1 C1_1 110.9(2) . . ?
F6_1 C3_1 C1_1 112.05(19) . . ?
F9_1 C4_1 F7_1 107.3(2) . . ?
F9_1 C4_1 F8_1 107.61(18) . . ?
F7_1 C4_1 F8_1 107.21(19) . . ?
F9_1 C4_1 C1_1 111.25(19) . . ?
F7_1 C4_1 C1_1 110.73(18) . . ?
F8_1 C4_1 C1_1 112.52(19) . . ?
O1_2 Al1 O1_2 113.58(11) 4_566 . ?
O1_2 Al1 O1_1 107.70(7) 4_566 . ?
O1_2 Al1 O1_1 106.93(7) . . ?
O1_2 Al1 O1_1 106.93(7) 4_566 4_566 ?
O1_2 Al1 O1_1 107.70(7) . 4_566 ?
O1_1 Al1 O1_1 114.18(11) . 4_566 ?
O1 C1 Nb1 180.0 . . ?
C4 Nb1 C4 70.38(14) 3_655 . ?
C4 Nb1 C2 114.95(8) 3_655 . ?
C4 Nb1 C2 73.64(8) . . ?
C4 Nb1 C2 73.64(8) 3_655 3_655 ?
C4 Nb1 C2 114.95(8) . 3_655 ?
C2 Nb1 C2 170.17(10) . 3_655 ?
C4 Nb1 C3 74.56(10) 3_655 3_655 ?
C4 Nb1 C3 117.15(9) . 3_655 ?
C2 Nb1 C3 76.48(9) . 3_655 ?
C2 Nb1 C3 102.35(9) 3_655 3_655 ?
C4 Nb1 C3 117.15(9) 3_655 . ?
C4 Nb1 C3 74.56(10) . . ?
C2 Nb1 C3 102.35(9) . . ?
C2 Nb1 C3 76.48(10) 3_655 . ?
C3 Nb1 C3 166.64(13) 3_655 . ?
C4 Nb1 C1 144.81(7) 3_655 . ?
C4 Nb1 C1 144.81(7) . . ?
C2 Nb1 C1 85.08(5) . . ?
C2 Nb1 C1 85.08(5) 3_655 . ?
C3 Nb1 C1 83.32(6) 3_655 . ?
C3 Nb1 C1 83.32(6) . . ?
O2 C2 Nb1 178.7(2) . . ?
O3 C3 Nb1 177.6(3) . . ?
O4 C4 Nb1 178.3(2) . . ?
 
loop_
 _geom_torsion_atom_site_label_1
 _geom_torsion_atom_site_label_2
 _geom_torsion_atom_site_label_3
 _geom_torsion_atom_site_label_4
 _geom_torsion
 _geom_torsion_site_symmetry_1
 _geom_torsion_site_symmetry_2
 _geom_torsion_site_symmetry_3
 _geom_torsion_site_symmetry_4
 _geom_torsion_publ_flag
Al1 O1_2 C1_2 C3_2 -61.0(3) . . . . ?
Al1 O1_2 C1_2 C4_2 61.0(3) . . . . ?
Al1 O1_2 C1_2 C2_2 179.69(19) . . . . ?
O1_2 C1_2 C2_2 F3_2 43.4(2) . . . . ?
C3_2 C1_2 C2_2 F3_2 -77.3(2) . . . . ?
C4_2 C1_2 C2_2 F3_2 164.03(18) . . . . ?
O1_2 C1_2 C2_2 F1_2 -75.7(2) . . . . ?
C3_2 C1_2 C2_2 F1_2 163.66(16) . . . . ?
C4_2 C1_2 C2_2 F1_2 45.0(2) . . . . ?
O1_2 C1_2 C2_2 F2_2 164.47(18) . . . . ?
C3_2 C1_2 C2_2 F2_2 43.8(2) . . . . ?
C4_2 C1_2 C2_2 F2_2 -74.9(2) . . . . ?
O1_2 C1_2 C3_2 F5_2 -73.7(2) . . . . ?
C4_2 C1_2 C3_2 F5_2 162.99(18) . . . . ?
C2_2 C1_2 C3_2 F5_2 44.9(2) . . . . ?
O1_2 C1_2 C3_2 F4_2 45.2(2) . . . . ?
C4_2 C1_2 C3_2 F4_2 -78.1(2) . . . . ?
C2_2 C1_2 C3_2 F4_2 163.85(16) . . . . ?
O1_2 C1_2 C3_2 F6_2 165.45(17) . . . . ?
C4_2 C1_2 C3_2 F6_2 42.1(2) . . . . ?
C2_2 C1_2 C3_2 F6_2 -75.9(2) . . . . ?
O1_2 C1_2 C4_2 F7_2 -81.7(2) . . . . ?
C3_2 C1_2 C4_2 F7_2 41.4(2) . . . . ?
C2_2 C1_2 C4_2 F7_2 159.87(17) . . . . ?
O1_2 C1_2 C4_2 F9_2 37.3(3) . . . . ?
C3_2 C1_2 C4_2 F9_2 160.47(18) . . . . ?
C2_2 C1_2 C4_2 F9_2 -81.0(2) . . . . ?
O1_2 C1_2 C4_2 F8_2 157.45(18) . . . . ?
C3_2 C1_2 C4_2 F8_2 -79.4(2) . . . . ?
C2_2 C1_2 C4_2 F8_2 39.1(2) . . . . ?
Al1 O1_1 C1_1 C4_1 -64.4(3) . . . . ?
Al1 O1_1 C1_1 C2_1 57.8(3) . . . . ?
Al1 O1_1 C1_1 C3_1 176.9(2) . . . . ?
O1_1 C1_1 C2_1 F3_1 73.5(2) . . . . ?
C4_1 C1_1 C2_1 F3_1 -163.42(19) . . . . ?
C3_1 C1_1 C2_1 F3_1 -45.0(2) . . . . ?
O1_1 C1_1 C2_1 F2_1 -165.09(19) . . . . ?
C4_1 C1_1 C2_1 F2_1 -42.0(3) . . . . ?
C3_1 C1_1 C2_1 F2_1 76.5(2) . . . . ?
O1_1 C1_1 C2_1 F1_1 -45.1(3) . . . . ?
C4_1 C1_1 C2_1 F1_1 78.1(2) . . . . ?
C3_1 C1_1 C2_1 F1_1 -163.51(19) . . . . ?
O1_1 C1_1 C3_1 F5_1 -41.6(3) . . . . ?
C4_1 C1_1 C3_1 F5_1 -161.9(2) . . . . ?
C2_1 C1_1 C3_1 F5_1 79.0(3) . . . . ?
O1_1 C1_1 C3_1 F4_1 78.2(2) . . . . ?
C4_1 C1_1 C3_1 F4_1 -42.1(2) . . . . ?
C2_1 C1_1 C3_1 F4_1 -161.12(19) . . . . ?
O1_1 C1_1 C3_1 F6_1 -161.8(2) . . . . ?
C4_1 C1_1 C3_1 F6_1 77.8(3) . . . . ?
C2_1 C1_1 C3_1 F6_1 -41.2(3) . . . . ?
O1_1 C1_1 C4_1 F9_1 78.7(2) . . . . ?
C2_1 C1_1 C4_1 F9_1 -44.5(2) . . . . ?
C3_1 C1_1 C4_1 F9_1 -163.1(2) . . . . ?
O1_1 C1_1 C4_1 F7_1 -40.5(2) . . . . ?
C2_1 C1_1 C4_1 F7_1 -163.70(19) . . . . ?
C3_1 C1_1 C4_1 F7_1 77.7(2) . . . . ?
O1_1 C1_1 C4_1 F8_1 -160.47(18) . . . . ?
C2_1 C1_1 C4_1 F8_1 76.3(2) . . . . ?
C3_1 C1_1 C4_1 F8_1 -42.3(3) . . . . ?
C1_2 O1_2 Al1 O1_2 83.0(2) . . . 4_566 ?
C1_2 O1_2 Al1 O1_1 -35.7(3) . . . . ?
C1_2 O1_2 Al1 O1_1 -158.8(2) . . . 4_566 ?
C1_1 O1_1 Al1 O1_2 34.2(3) . . . 4_566 ?
C1_1 O1_1 Al1 O1_2 156.6(3) . . . . ?
C1_1 O1_1 Al1 O1_1 -84.3(3) . . . 4_566 ?
 
_refine_diff_density_max    0.235
_refine_diff_density_min   -0.368
_refine_diff_density_rms    0.039

_shelx_res_file
;
TITL c2221_new3_e.res in C222(1)
    IK_WU18_2_0m_final.res
    created by SHELXL-2018/3 at 13:29:28 on 29-Jan-2019
REM Old TITL c2221_new3 in C222(1)
REM SHELXT solution in C222(1): R1 0.430, Rweak 0.027, Alpha 0.036
REM <I/s>   1.898 for   13 systematic absences,  Orientation as input
REM Flack x =  0.378 ( 0.006 ) from  1556 Parsons' quotients
REM Formula found by SHELXT:  C72 O6 F14 Al26 Nb I
CELL  0.71073   9.3829  20.0929  20.1106   90.000   90.000   90.000
ZERR   4.000   0.0006   0.0013   0.0013    0.000    0.000    0.000
LATT -7
SYMM -X, -Y, 1/2+Z
SYMM -X, Y, 1/2-Z
SYMM X, -Y, -Z
SFAC  C  O  F  AL  NB
UNIT 92 44 144 4 4
TEMP -173.150
L.S. 10
BOND
LIST 4
ACTA
CONF
SIZE 0.1 0.08 0.02
TWIN -1 0 0 0 0 1 0 1 0 -4
FMAP 2
PLAN 20
REM Restraints for Fragment oc(cf3)3, Nonafluoro-tert-butoxy, [(CF3)3CO]-
REM from: TURBOMOLE V6.0 B-P86/def-SV(P). Please cite
REM https://doi.org/10.1107/S1600576718004508
REM SADI_CCF3 0.02 C1 C2 C1 C3 C1 C4
REM SADI_CCF3 0.02 F1 C2 F2 C2 F3 C2 F4 C3 F5 C3 F6 C3 F7 C4 F8 C4 F9 C4
REM SADI_CCF3 0.04 C2 C3 C3 C4 C2 C4
REM SADI_CCF3 0.04 O1 C2 O1 C3 O1 C4
REM SADI_CCF3 0.04 F1 F2 F2 F3 F3 F1 F4 F5 F5 F6 F6 F4 F7 F8 F8 F9 F9 F7
REM SADI_CCF3 0.02 O1 C1
REM SADI_CCF3 0.1 F1 C1 F2 C1 F3 C1 F4 C1 F5 C1 F6 C1 F7 C1 F8 C1 F9 C1
REM SIMU_CCF3 O1 > F9
REM RIGU_CCF3 O1 > F9
REM SAME_CCF3 O1 > F9
WGHT    0.021900    1.962700
BASF   0.08939   0.93655  -0.01037
FVAR       0.25107
RESI 2 CCF3
O1    2    0.343708    0.558294    0.457722    11.00000    0.02001    0.01571 =
         0.01260    0.00153    0.00271   -0.00312
C1    1    0.417000    0.571622    0.401541    11.00000    0.02051    0.01383 =
         0.01338    0.00171    0.00190   -0.00118
C2    1    0.477940    0.643695    0.407542    11.00000    0.02918    0.01527 =
         0.02139    0.00017    0.00796   -0.00453
F1    3    0.374817    0.688306    0.397898    11.00000    0.04337    0.01620 =
         0.03188    0.00376    0.01187    0.00631
F2    3    0.580376    0.655468    0.362531    11.00000    0.03458    0.02139 =
         0.03076   -0.00080    0.01419   -0.00984
F3    3    0.531574    0.654106    0.467507    11.00000    0.04152    0.02702 =
         0.02517   -0.00691    0.00234   -0.01512
C3    1    0.542911    0.522110    0.392330    11.00000    0.01944    0.01984 =
         0.01792    0.00302    0.00024   -0.00214
F4    3    0.499584    0.460263    0.404317    11.00000    0.03033    0.01504 =
         0.03075    0.00384    0.00491    0.00163
F5    3    0.647432    0.535853    0.434628    11.00000    0.02137    0.03740 =
         0.02865    0.00102   -0.00775    0.00053
F6    3    0.597072    0.523540    0.330747    11.00000    0.02504    0.02362 =
         0.02217    0.00015    0.00686    0.00188
C4    1    0.318609    0.568733    0.339081    11.00000    0.02107    0.02443 =
         0.01448    0.00296    0.00229    0.00204
F7    3    0.299868    0.506539    0.318293    11.00000    0.02988    0.03166 =
         0.01944   -0.00446   -0.00316   -0.00936
F8    3    0.370287    0.603667    0.287635    11.00000    0.02891    0.03288 =
         0.01670    0.00857    0.00296    0.00134
F9    3    0.190099    0.593249    0.353001    11.00000    0.02089    0.04905 =
         0.02294    0.00578   -0.00025    0.00973
RESI 0
REM REM DSR REPLACE OC(CF3)3 WITH O1 C1 C2 ON O2 C00M C00Y OCC 11 RESI CCF3
RESI 1 CCF3
O1    2    0.142418    0.458022    0.441095    11.00000    0.02146    0.01347 =
         0.01596   -0.00240   -0.00422   -0.00234
C1    1    0.070802    0.401751    0.426050    11.00000    0.02030    0.01564 =
         0.01566   -0.00400   -0.00157   -0.00329
C2    1   -0.048931    0.387787    0.477567    11.00000    0.02364    0.02812 =
         0.02650   -0.00610    0.00238   -0.00498
F1    3    0.000881    0.396846    0.539149    11.00000    0.04309    0.04384 =
         0.01757   -0.00628    0.00749   -0.01432
F2    3   -0.099622    0.325953    0.474188    11.00000    0.03631    0.03387 =
         0.03499   -0.00387    0.00766   -0.01738
F3    3   -0.156855    0.429554    0.469063    11.00000    0.02369    0.04737 =
         0.05730   -0.01180    0.00748    0.00547
C3    1    0.001529    0.411524    0.356042    11.00000    0.03869    0.02240 =
         0.02225   -0.00197   -0.01112   -0.00520
F4    3    0.097739    0.403504    0.307931    11.00000    0.06161    0.03825 =
         0.01564   -0.00279   -0.00038   -0.01785
F5    3   -0.052901    0.471803    0.349903    11.00000    0.05560    0.02971 =
         0.04312    0.00352   -0.02926    0.00109
F6    3   -0.104020    0.367751    0.344827    11.00000    0.04370    0.03719 =
         0.03375   -0.00327   -0.01764   -0.01666
C4    1    0.172972    0.341096    0.422805    11.00000    0.02712    0.01525 =
         0.02642   -0.00310    0.00348   -0.00286
F7    3    0.295058    0.357618    0.393154    11.00000    0.02856    0.02411 =
         0.05338   -0.00466    0.01593    0.00050
F8    3    0.117692    0.290219    0.388847    11.00000    0.04542    0.01662 =
         0.03446   -0.01003    0.00327   -0.00528
F9    3    0.205174    0.319107    0.483389    11.00000    0.04111    0.02041 =
         0.03626    0.00512   -0.01042    0.00189
RESI 0
REM REM DSR REPLACE OC(CF3)3 WITH O1 C1 C2 ON O1 C01A C00U OCC 11 RESI CCF3
AL1   4    0.242727    0.500000    0.500000    10.50000    0.01503    0.01199 =
         0.00961   -0.00078    0.00000    0.00000
O1    2    0.500000    0.409000    0.250000    10.50000    0.13198    0.01842 =
         0.05151    0.00000   -0.02607    0.00000
C1    1    0.500000    0.354046    0.250000    10.50000    0.06378    0.02474 =
         0.03088    0.00000   -0.01883    0.00000
NB1   5    0.500000    0.241099    0.250000    10.50000    0.01898    0.01490 =
         0.01504    0.00000   -0.00025    0.00000
C2    1    0.267922    0.250426    0.246704    11.00000    0.02841    0.01940 =
         0.02056    0.00025   -0.00121    0.00298
O2    2    0.148606    0.255263    0.243749    11.00000    0.02465    0.03613 =
         0.03588    0.00237   -0.00175    0.00655
C3    1    0.545894    0.253872    0.356846    11.00000    0.03207    0.02575 =
         0.02553   -0.00157   -0.00321    0.00782
O3    2    0.572312    0.262004    0.410359    11.00000    0.05654    0.04771 =
         0.02432   -0.00785   -0.01033    0.01468
C4    1    0.416798    0.154527    0.297045    11.00000    0.01677    0.03174 =
         0.02796    0.00849   -0.00327    0.00010
O4    2    0.370644    0.109765    0.322741    11.00000    0.02589    0.04178 =
         0.04896    0.02468   -0.00639   -0.00860
HKLF 4


REM  c2221_new3_e.res in C222(1)
REM wR2 = 0.0406, GooF = S = 1.081, Restrained GooF = 1.081 for all data
REM R1 = 0.0154 for 3874 Fo > 4sig(Fo) and 0.0155 for all 3895 data
REM 330 parameters refined using 0 restraints

END

WGHT      0.0219      1.9629

REM Highest difference peak  0.235,  deepest hole -0.368,  1-sigma level  0.039
Q1    1   0.3781  0.5731  0.3697  11.00000  0.05    0.24
Q2    1   0.0102  0.3950  0.4488  11.00000  0.05    0.22
Q3    1   0.4804  0.5463  0.3942  11.00000  0.05    0.21
Q4    1   0.4453  0.6065  0.4037  11.00000  0.05    0.21
Q5    1   0.0447  0.4058  0.3966  11.00000  0.05    0.20
Q6    1   0.1207  0.3708  0.4272  11.00000  0.05    0.19
Q7    1   0.3756  0.2503  0.2514  11.00000  0.05    0.17
Q8    1  -0.1173  0.4523  0.4390  11.00000  0.05    0.16
Q9    1   0.5000  0.2787  0.2500  10.50000  0.05    0.16
Q10   1   0.3724  0.5605  0.4361  11.00000  0.05    0.15
Q11   1   0.1278  0.4317  0.4408  11.00000  0.05    0.14
Q12   1   0.1726  0.4602  0.4498  11.00000  0.05    0.14
Q13   1   0.6011  0.6668  0.4721  11.00000  0.05    0.14
Q14   1   0.4132  0.1931  0.2751  11.00000  0.05    0.14
Q15   1   0.1776  0.3937  0.3302  11.00000  0.05    0.13
Q16   1   0.5998  0.5512  0.4589  11.00000  0.05    0.13
Q17   1   0.0013  0.5210  0.4082  11.00000  0.05    0.13
Q18   1  -0.0713  0.4761  0.3368  11.00000  0.05    0.13
Q19   1   0.5429  0.6227  0.4858  11.00000  0.05    0.12
Q20   1   0.0557  0.4408  0.3126  11.00000  0.05    0.12
;
_shelx_res_checksum   88730

_shelx_hkl_file
;
  -1   0   0 0.17964 0.28488   9
  -1   0   0 0.22631 0.30865   9
  -1   0   0 0.17607 0.15571  10
  -1   0   0 -0.0222 0.13719  10
   1   0   0 -0.0331 0.16456   1
   1   0   0 -0.0265 0.17876   2
   1   0   0 -0.1064 0.17481   2
   1   0   0 0.21189 0.25930   4
   1   0   0 0.00477 0.24454   5
   1   0   0 0.06905 0.18208   7
   1   0   0 0.07666 0.31749   8
   1   0   0 0.06402 0.29150   9
   1   0   0 -0.0602 0.13361  10
   1   0   0 0.08506 0.14351  10
  -1   0   0 0.20898 0.33763   8
  -1   0   0 0.03790 0.31891   8
  -1   0   0 0.09397 0.18115   1
  -1   0   0 0.15323 0.18920   2
  -1   0   0 0.16728 0.19415   2
  -1   0   0 0.01510 0.25503   4
  -1   0   0 0.15071 0.26635   5
  -1   0   0 0.13009 0.18964   7
  -2   0   0 8601.20 214.496   7
  -2   0   0 8770.14 222.236   8
  -2   0   0 8756.41 219.950   9
  -2   0   0 8304.02 213.817  10
   2   0   0 8656.83 215.005   1
   2   0   0 8569.69 215.845   2
   2   0   0 8557.04 215.496   2
   2   0   0 8421.90 218.031   4
   2   0   0 8600.10 217.582   5
   2   0   0 8840.52 221.812   8
   2   0   0 8920.12 219.752   9
   2   0   0 8557.19 213.400  10
  -2   0   0 8555.05 217.709   4
  -2   0   0 8740.28 215.046   1
  -2   0   0 8685.45 215.781   2
  -2   0   0 8613.08 215.635   2
  -2   0   0 8691.00 222.939   8
   3   0   0 0.49542 0.44372   7
   3   0   0 0.70265 0.76304   9
   3   0   0 0.27809 0.42855   1
   3   0   0 1.45433 0.73399   4
  -3   0   0 0.21767 0.40552   1
  -3   0   0 0.69376 0.52732   2
  -3   0   0 -0.2184 0.47422   2
  -3   0   0 0.20193 0.61985   5
  -3   0   0 0.19485 0.49066   7
  -3   0   0 0.20075 0.76972   8
  -3   0   0 0.77279 0.88169   8
  -3   0   0 0.91063 0.77733   9
  -3   0   0 0.49551 0.42834  10
   3   0   0 0.90065 0.53726   2
   3   0   0 0.71470 0.39902  10
   3   0   0 1.08253 0.66620   5
   4   0   0 829.915 22.7771   5
   4   0   0 833.811 21.9857   2
  -4   0   0 843.848 22.2346   2
  -4   0   0 840.251 22.7467   5
   4   0   0 821.514 21.3470   7
  -4   0   0 841.901 21.5790  10
  -4   0   0 822.737 21.6001   1
   4   0   0 815.256 22.7808   4
   4   0   0 859.200 23.6395   9
   4   0   0 799.781 21.6337   1
   4   0   0 862.296 24.4171   8
  -4   0   0 834.847 23.7705   9
  -4   0   0 824.053 21.6977   7
  -4   0   0 832.246 24.2656   8
  -4   0   0 864.935 24.7822   8
   4   0   0 808.050 21.0773  10
  -5   0   0 3.28761 1.60147   8
   5   0   0 1.99254 1.42906   8
   5   0   0 2.88978 1.49937   9
   5   0   0 3.16860 1.06704   2
   5   0   0 3.18223 1.23685   5
   5   0   0 3.45696 0.91394   1
   5   0   0 3.06296 1.30925   4
  -5   0   0 3.05706 1.62504   8
  -5   0   0 2.81297 1.46254   9
  -5   0   0 4.81809 0.99301  10
  -6   0   0 1074.48 27.8244  10
   6   0   0 996.833 26.9933   7
  -6   0   0 1093.88 27.4178   1
   6   0   0 1023.25 29.4417   4
   6   0   0 1000.52 26.5776  10
  -6   0   0 1071.21 28.0477   7
  -6   0   0 1086.14 32.3410   8
  -6   0   0 1074.65 29.5603   5
  -6   0   0 1060.05 31.2970   9
  -6   0   0 1074.90 28.9021   2
   6   0   0 1043.24 31.6343   8
   6   0   0 1069.50 27.5247   1
   6   0   0 1036.18 27.5091   1
   6   0   0 1109.15 28.2729   2
   6   0   0 1065.02 30.7954   9
  -7   0   0 4.12880 1.43694   2
  -7   0   0 4.18101 2.17419   8
  -7   0   0 4.35632 1.19745  10
  -7   0   0 5.03659 1.33033   7
   7   0   0 2.67057 1.87845   8
  -7   0   0 6.39615 1.96389   5
  -7   0   0 4.16077 2.05445   9
  -8   0   0 565.774 17.9461   2
  -8   0   0 572.337 16.5844  10
  -8   0   0 566.843 20.9499   9
  -8   0   0 562.771 16.8456   7
  -8   0   0 575.515 21.8533   8
  -8   0   0 565.711 18.6434   5
  -9   0   0 0.15190 1.54379   2
  -9   0   0 0.58815 2.12424   9
  -9   0   0 0.26903 1.25453  10
  -9   0   0 1.23815 2.30535   8
  -9   0   0 -0.5261 1.77466   5
  -9   0   0 0.29729 1.43483   7
 -10   0   0 219.356 8.94535   7
 -10   0   0 213.567 9.94413   2
 -10   0   0 215.398 12.8377   9
 -10   0   0 210.948 13.2630   8
 -10   0   0 224.892 8.69099  10
 -11   0   0 1.61541 1.77225   7
 -11   0   0 -0.0628 2.78431   9
 -11   0   0 0.97140 1.95190   2
 -11   0   0 0.68709 1.65919  10
   0  -1   0 0.02013 0.11196   3
   0   1   0 -0.0112 0.11806   3
   0  -1   0 0.01886 0.14597   8
   0   1   0 0.10855 0.16289   1
   0  -1   0 0.01179 0.14510   1
   0   1   0 0.12110 0.15554   8
   1   1   0 0.75395 0.45075   8
  -1   1   0 0.51123 0.21798  10
  -1  -1   0 0.79012 0.33850   9
  -1   1   0 1.00252 0.39753   8
   1   1   0 1.12695 0.31658   4
   1   1   0 2.20719 0.44378   5
   1  -1   0 0.89034 0.38662   9
   1   1   0 1.90761 0.61776   8
  -1   1   0 0.73340 0.38093   9
   1  -1   0 1.04931 0.39268   4
  -1   1   0 0.41741 0.26584   2
  -1   1   0 1.21891 0.30740   2
  -1   1   0 1.41368 0.39655   4
  -1   1   0 0.99101 0.29589   5
  -1  -1   0 0.56612 0.19068   2
   1  -1   0 0.77252 0.26448   7
   1  -1   0 0.94154 0.38947   8
   1  -1   0 0.56975 0.24502   2
   1   1   0 1.59362 0.37977   9
  -1   1   0 1.08368 0.39689   1
   1   1   0 0.97957 0.18264   2
  -1   1   0 1.22922 0.28572   7
   1  -1   0 0.63413 0.21267  10
  -1  -1   0 0.94349 0.21459   2
  -1  -1   0 1.98451 0.57320   8
  -1  -1   0 2.08435 0.41775   5
  -1  -1   0 0.79213 0.48544   8
  -1  -1   0 0.99875 0.37380   9
   1  -1   0 0.56559 0.35303   1
   2  -1   0 1.08568 0.52278   5
   2   1   0 0.09621 0.44004   9
   2  -1   0 -0.1971 0.54433   8
  -2   1   0 0.71822 0.53481   4
  -2   1   0 0.39976 0.44919   2
  -2  -1   0 0.31720 0.68657   8
   2  -1   0 0.77417 0.47775   2
   2  -1   0 0.07780 0.49863   4
  -2   1   0 -0.4461 0.36939   2
   2  -1   0 0.18156 0.36850  10
   2   1   0 0.12390 0.34648   2
  -2   1   0 -0.1746 0.48176   1
   2  -1   0 0.30723 0.68479   9
  -2   1   0 -0.0794 0.40730   7
  -2   1   0 0.52261 0.60565   8
   2  -1   0 0.42941 0.43170   7
  -2   1   0 0.52562 0.36738  10
   2  -1   0 0.23052 0.47322   1
   2  -1   0 0.73198 0.41171   2
  -2   1   0 0.62756 0.62668   9
   2   1   0 0.43416 0.55308   5
  -2   1   0 0.21042 0.42609   5
  -2  -1   0 0.28627 0.54179   9
  -2  -1   0 0.06902 0.51173   9
  -2  -1   0 0.04848 0.28645  10
   2   1   0 0.01061 0.16392   2
   2   1   0 0.09740 0.45331   4
  -2  -1   0 0.31075 0.51238   5
   2   1   0 0.07736 0.70879   8
  -2  -1   0 0.03282 0.39748   7
  -2  -1   0 -0.2112 0.35254   2
  -2  -1   0 0.63711 0.76581   8
   2   1   0 -0.0820 0.10195   7
  -2  -1   0 -0.2447 0.35692   2
   2   1   0 0.31230 0.73392   8
   2   1   0 0.09600 0.21069   7
  -3  -1   0 4.56339 0.82642   2
   3   1   0 5.72402 1.24961   9
  -3  -1   0 7.01499 0.76911  10
   3  -1   0 5.24628 0.71803  10
   3   1   0 5.66099 1.08394   4
  -3   1   0 6.74129 0.95119   7
   3   1   0 6.39089 0.85684   2
  -3   1   0 7.40914 1.22047   2
   3  -1   0 6.09064 0.90209   7
   3  -1   0 4.88010 1.22818   8
   3  -1   0 8.02511 1.51881   9
  -3   1   0 7.56297 1.21744   5
  -3  -1   0 5.94564 0.81838   7
  -3   1   0 5.94337 0.83789  10
  -3   1   0 5.81623 1.09676   4
  -3  -1   0 4.42664 1.09773   9
  -3   1   0 5.35600 0.95017   2
  -3   1   0 4.48594 1.22363   8
  -3  -1   0 5.05693 0.84791   2
   3  -1   0 5.80583 0.95754   2
   3  -1   0 5.51047 1.12976   4
   3  -1   0 5.45507 1.04769   5
  -3  -1   0 5.49437 1.15965   5
   3   1   0 5.76284 1.19045   5
  -3   1   0 6.70259 1.46540   8
  -3   1   0 5.86853 1.42747   9
   3   1   0 5.07487 1.43102   8
  -3  -1   0 5.29888 1.43002   8
   3  -1   0 7.12392 1.11325   1
   3   1   0 5.97962 0.58015   7
  -3  -1   0 5.55719 1.55832   8
  -3   1   0 7.18428 1.12709   1
   4   1   0 14.2087 2.29377   8
   4   1   0 10.4245 1.60266   4
  -4   1   0 7.70389 1.35994   5
   4  -1   0 13.7945 1.93818   4
   4  -1   0 7.06025 1.62249   9
  -4   1   0 11.2726 1.27226  10
   4  -1   0 7.82170 1.29424   1
   4  -1   0 13.1827 2.06422   8
  -4  -1   0 8.46049 1.27228   2
  -4   1   0 13.9249 1.75416   2
  -4   1   0 14.4568 2.21292   8
  -4  -1   0 12.7257 1.88938   5
  -4  -1   0 10.4376 1.28111   7
  -4  -1   0 13.2500 2.34287   8
  -4  -1   0 15.7537 2.69104   8
   4   1   0 9.63932 0.83689   7
   4   1   0 10.0704 1.65642   5
  -4   1   0 11.5100 1.38415   7
   4  -1   0 8.45324 1.01697  10
   4   1   0 8.99831 1.22975   2
   4  -1   0 7.73586 1.33162   2
   4   1   0 8.97289 1.79778   9
  -4  -1   0 16.1942 2.41018   9
  -4   1   0 15.2817 2.45820   9
  -4  -1   0 10.1278 1.08191  10
  -4   1   0 12.0652 1.47456   1
  -4  -1   0 8.44124 1.32911   2
  -4   1   0 14.9531 2.31467   8
   4  -1   0 12.3587 1.73981   5
   5  -1   0 162.414 6.57966   5
  -5   1   0 165.721 8.07217   8
  -5   1   0 162.110 7.84489   8
  -5  -1   0 174.064 5.66344   7
  -5  -1   0 162.296 8.05958   8
  -5  -1   0 164.709 6.70058   5
  -5   1   0 167.555 7.76473   9
  -5   1   0 172.196 5.62548  10
  -5  -1   0 168.946 5.47739  10
   5   1   0 170.548 6.66359   4
   5   1   0 160.290 6.71708   5
  -5  -1   0 161.269 6.04780   2
   5   1   0 162.567 4.69002   7
   5   1   0 157.617 4.67872   7
   5   1   0 175.171 5.72843   2
   5   1   0 169.533 7.27937   9
   5  -1   0 165.154 5.12140  10
  -5   1   0 163.539 5.94605   1
  -5   1   0 165.389 6.26643   2
   5  -1   0 169.179 6.08508   2
   5  -1   0 161.973 6.03017   1
  -5  -1   0 164.221 7.54277   9
   5  -1   0 179.923 7.72210   9
  -5   1   0 170.509 5.78018   7
   5   1   0 153.569 7.89830   8
  -5   1   0 163.467 6.55833   5
  -5  -1   0 170.088 8.48155   8
   5  -1   0 163.529 7.77057   8
   5  -1   0 171.582 6.88089   4
  -6  -1   0 16.2582 1.71630  10
   6   1   0 17.3369 3.20014   4
  -6  -1   0 25.9008 4.28577   8
  -6   1   0 15.4810 1.71627  10
  -6   1   0 21.1744 2.01535   1
  -6  -1   0 19.2099 2.73194   5
   6  -1   0 14.7815 1.33590  10
  -6  -1   0 17.0258 2.09130   2
   6  -1   0 11.4086 1.90333   2
   6   1   0 21.7902 3.78826   8
   6  -1   0 12.5203 1.87103   1
  -6   1   0 15.3275 2.40363   5
   6  -1   0 17.6965 2.70862   4
  -6   1   0 23.6153 3.88805   9
  -6  -1   0 25.2591 3.80270   9
   6  -1   0 23.1201 3.28436   8
   6  -1   0 14.7070 2.99907   9
  -6   1   0 19.2890 2.46660   2
   6   1   0 9.72340 2.36286   9
  -6   1   0 15.3140 1.95890   7
  -6  -1   0 13.7901 1.81534   7
  -6   1   0 23.3975 3.89126   8
  -7  -1   0 6.05898 1.71243   2
  -7  -1   0 5.78030 2.37372   9
  -7  -1   0 2.75542 1.61735   5
  -7   1   0 5.18272 1.64553   2
  -7  -1   0 5.44950 2.48496   8
  -7  -1   0 5.97028 1.39375  10
  -7   1   0 4.24615 1.22425   1
   7  -1   0 4.59367 2.13354   8
  -7  -1   0 6.14578 1.50789   7
  -7   1   0 8.95980 2.95964   9
  -7   1   0 6.94156 2.03697   5
  -7   1   0 4.40612 1.27594  10
  -7   1   0 3.84877 2.16058   8
  -7   1   0 6.20850 1.51132   7
   7  -1   0 6.34886 1.01166  10
  -8  -1   0 -0.4722 1.41109   5
  -8  -1   0 -0.2584 1.01254  10
  -8  -1   0 -0.9046 1.88922   8
  -8   1   0 0.48032 1.48394   5
  -8   1   0 -0.5174 1.13321   7
  -8  -1   0 1.45561 1.27515   7
  -8  -1   0 -1.3145 1.12040   2
  -8   1   0 0.48374 2.05823   8
  -8   1   0 -0.2127 1.09534  10
  -8   1   0 0.17236 1.41918   2
  -8   1   0 0.65791 2.02941   9
  -8  -1   0 -0.0058 1.85953   9
  -9  -1   0 1.89015 2.53773   9
  -9   1   0 3.78729 1.95386   2
  -9   1   0 4.22379 1.80214   7
  -9  -1   0 4.16783 1.71707   7
  -9   1   0 2.04054 2.48884   9
  -9  -1   0 5.44039 3.11311   8
  -9  -1   0 2.28535 1.39887  10
  -9  -1   0 2.73772 1.80732   2
  -9  -1   0 4.28367 2.18336   5
  -9   1   0 1.23395 1.84879   5
  -9   1   0 3.48881 1.53570  10
  -9   1   0 1.89576 2.49629   8
 -10   1   0 0.05580 2.81140   8
 -10   1   0 0.44315 2.48265   9
 -10  -1   0 1.15836 2.55978   9
 -10  -1   0 -1.5239 2.48103   8
 -10  -1   0 -0.7199 1.64300   2
 -10   1   0 0.76693 1.46456  10
 -10   1   0 -1.4600 1.55017   2
 -10  -1   0 -0.5691 1.44094   7
 -10   1   0 0.57211 1.53848   7
 -10  -1   0 -0.7814 1.40634  10
 -11  -1   0 4.41888 2.43915   2
 -11   1   0 5.07542 2.48269   2
 -11  -1   0 5.27305 2.19080   7
 -11   1   0 5.15497 2.02382  10
 -11  -1   0 3.81026 1.85041  10
 -11   1   0 4.44029 2.12842   7
 -11  -1   0 6.90411 3.51008   9
   0   2   0 558.882 15.0945   8
   0  -2   0 582.556 14.5655   4
   0  -2   0 581.686 14.7055   5
   0  -2   0 577.949 14.7745   9
   0   2   0 598.855 15.3474   1
   0  -2   0 582.257 14.9080   3
   0  -2   0 570.435 15.1288   8
   0   2   0 573.082 14.5756   5
   0   2   0 593.799 14.7469   4
   0   2   0 560.501 14.8843   3
   0   2   0 596.642 14.9204   9
   0  -2   0 609.704 14.7180   9
   1   2   0 0.28318 0.36574   5
   1  -2   0 0.39184 0.24527   5
   1  -2   0 0.02294 0.29541   2
   1   2   0 0.07848 0.32209   1
  -1   2   0 0.11465 0.37643   4
  -1   2   0 0.21886 0.26732   2
  -1  -2   0 0.34725 0.32856   1
  -1  -2   0 0.71871 0.40703   5
  -1  -2   0 1.05014 0.58528   8
  -1  -2   0 0.49170 0.57995   8
  -1  -2   0 -0.2646 0.29656   9
   1   2   0 0.40282 0.26208   4
  -1   2   0 0.17428 0.48559   1
  -1   2   0 0.16776 0.32853   2
   1  -2   0 0.44378 0.40796   4
  -1   2   0 -0.0329 0.43572   9
   1  -2   0 0.06379 0.36334   8
  -1  -2   0 0.41823 0.29147   9
  -1   2   0 0.18552 0.24885   7
  -1   2   0 -0.1644 0.35683   8
  -1   2   0 0.05111 0.23048  10
   1   2   0 0.92002 0.59193   8
   1  -2   0 0.11137 0.24566   7
   1  -2   0 0.36492 0.30068   2
   1  -2   0 0.02389 0.39522   9
  -1   2   0 0.05106 0.21306   5
   1  -2   0 0.19137 0.43740   1
   1  -2   0 -0.0502 0.18942  10
  -2  -2   0 882.850 22.9594   5
  -2  -2   0 897.942 22.9625   9
   2  -2   0 895.975 23.5256   9
  -2  -2   0 892.994 22.2148   2
  -2  -2   0 890.930 23.0369   9
   2   2   0 893.215 22.9989   9
  -2   2   0 884.038 23.3549   1
  -2   2   0 885.809 22.7023   2
  -2   2   0 871.134 23.6126   9
   2  -2   0 861.409 22.3162   7
  -2  -2   0 861.585 21.7615   7
   2   2   0 862.109 24.1074   8
   2  -2   0 880.023 22.5231   5
   2   2   0 864.318 24.2652   8
   2  -2   0 896.372 23.1670   8
  -2   2   0 897.660 22.5373   5
   2  -2   0 870.845 22.1630  10
   2  -2   0 897.291 22.6595   2
  -2  -2   0 883.518 22.1655   2
  -2   2   0 886.329 22.3338   7
  -2  -2   0 852.546 24.2956   8
  -2  -2   0 826.028 21.7418   7
  -2  -2   0 902.129 24.1548   8
  -2   2   0 899.246 22.2656  10
  -2   2   0 876.783 23.0486   4
   2  -2   0 883.860 23.0572   4
   2  -2   0 917.017 23.4294   1
  -2   2   0 906.165 22.6156   2
  -2   2   0 864.515 23.1452   8
   2   2   0 887.501 22.9565   5
   2   2   0 866.397 22.5456   4
   3  -2   0 0.56295 0.66465   4
   3  -2   0 0.25244 0.56191   5
   3  -2   0 -0.1343 0.51413   2
   3  -2   0 0.67133 0.47605  10
  -3   2   0 0.46389 0.66218   4
  -3   2   0 0.39920 0.55895   2
  -3  -2   0 0.11474 0.45924   2
  -3   2   0 0.68170 0.51209   7
  -3  -2   0 0.52035 0.89590   8
   3   2   0 0.34439 0.91149   8
   3   2   0 0.58875 0.63943   9
   3   2   0 0.09184 0.38135   2
  -3   2   0 -0.1187 0.51501   5
  -3  -2   0 0.81087 0.67320   5
   3   2   0 0.78274 0.71051   5
  -3   2   0 -0.0394 0.63641   1
   3   2   0 1.02937 1.04999   8
  -3  -2   0 -0.4225 0.43113   2
  -3   2   0 0.65991 0.80763   9
  -3   2   0 0.34003 0.44862  10
  -3  -2   0 -0.0051 0.33025  10
   3  -2   0 0.06813 0.71529   8
  -3  -2   0 0.33643 0.67452   9
  -3  -2   0 1.08458 1.06709   8
   3   2   0 0.29465 0.58280   4
   3  -2   0 0.53138 0.69439   1
   3  -2   0 0.44287 0.80742   9
  -3   2   0 0.09690 0.72021   8
  -3  -2   0 -0.1132 0.61705   9
  -4  -2   0 311.051 11.9427   8
  -4  -2   0 304.183 9.23441   2
   4   2   0 326.950 8.74588   2
  -4  -2   0 324.465 10.1416   5
  -4   2   0 323.369 8.98605  10
  -4   2   0 311.305 9.91303   1
   4  -2   0 315.696 10.2226   4
   4   2   0 316.776 10.1505   5
  -4   2   0 296.155 10.9858   9
   4  -2   0 304.030 10.6877   8
  -4  -2   0 305.583 8.73438   7
  -4   2   0 297.581 9.55130   2
  -4   2   0 309.493 9.71062   5
  -4  -2   0 326.445 9.29938   2
   4   2   0 314.354 9.74128   4
  -4  -2   0 297.905 10.4438   9
   4  -2   0 319.839 10.0222   1
  -4   2   0 305.312 9.08025   7
   4  -2   0 315.799 10.8832   9
  -4   2   0 305.344 10.9526   8
   4  -2   0 331.980 9.63363   2
  -4   2   0 310.663 10.9321   8
   4   2   0 307.999 11.5873   8
   4  -2   0 310.230 9.72366   5
  -4  -2   0 316.332 8.63975  10
  -4  -2   0 307.622 11.5869   8
   5  -2   0 -0.9207 1.00745   8
  -5   2   0 -0.1314 1.17029   9
  -5   2   0 0.05614 0.81598   2
   5   2   0 0.22128 0.93862   4
  -5  -2   0 -0.4861 1.44768   8
   5   2   0 -0.3470 1.32865   8
  -5  -2   0 -1.0454 0.70031   7
   5   2   0 -0.6649 0.61160   2
  -5  -2   0 -0.5596 0.67707   2
  -5   2   0 0.02863 0.63186  10
  -5  -2   0 -0.3877 1.08658   9
   5  -2   0 0.04674 0.93349   4
   5  -2   0 -0.0779 0.90072   5
   5  -2   0 0.65228 1.22621   9
  -5   2   0 -0.4483 0.83593   1
  -5  -2   0 0.34723 1.00884   5
  -5   2   0 0.28228 0.76364   7
   5  -2   0 -0.1711 0.93777   1
   5   2   0 -0.9846 0.98483   9
  -5   2   0 -0.3037 0.86282   5
  -5   2   0 0.02079 1.21234   8
  -5   2   0 -0.9835 1.05342   8
   5   2   0 -0.1156 0.94347   5
  -5  -2   0 0.38483 1.44185   8
   5  -2   0 0.04776 0.81261   2
  -5  -2   0 -0.1444 0.63242  10
   5  -2   0 0.37322 0.71896  10
   6   2   0 1.99109 1.51651   9
  -6   2   0 3.00066 1.29098   2
  -6  -2   0 3.18075 1.49146   5
  -6  -2   0 8.93258 1.70769   2
  -6   2   0 2.82368 1.75251   9
   6   2   0 4.37074 1.07861   2
   6  -2   0 4.84606 1.95587   8
  -6   2   0 4.78673 1.27369   7
  -6  -2   0 3.83024 1.07494  10
  -6   2   0 4.63849 1.98879   8
   6  -2   0 3.51158 1.59275   4
  -6  -2   0 3.81539 2.18549   8
  -6  -2   0 3.73842 1.17473   7
  -6   2   0 6.96426 1.32033  10
   6  -2   0 2.18556 1.23064   2
   6  -2   0 3.29513 1.79495   9
  -6   2   0 4.14449 1.38642   1
  -6   2   0 2.93225 1.82823   8
  -6  -2   0 3.72669 1.78677   9
   6  -2   0 4.89801 1.00666  10
  -6   2   0 2.77079 1.33934   5
  -7  -2   0 -0.3927 1.00769   2
  -7   2   0 -0.2112 1.44440   9
  -7  -2   0 -0.4647 0.91098   7
  -7   2   0 1.25527 1.36505   5
  -7  -2   0 -1.3648 1.08996   5
   7  -2   0 -0.4063 1.31580   8
  -7   2   0 -0.5508 1.37254   8
  -7  -2   0 -0.0173 1.56372   9
  -7  -2   0 -1.3098 1.59813   8
  -7   2   0 -0.2293 0.83786  10
  -7   2   0 -0.3740 0.89248   1
  -7  -2   0 -0.9289 0.74043  10
  -7   2   0 0.06875 1.11265   2
   7  -2   0 -0.7476 0.64132  10
  -7   2   0 0.16073 0.98413   7
  -8  -2   0 156.273 6.49611   7
  -8  -2   0 159.380 8.06441   5
  -8   2   0 161.399 9.69955   8
  -8  -2   0 165.043 7.33359   2
  -8  -2   0 160.985 6.33577  10
  -8   2   0 167.182 9.90576   9
  -8   2   0 154.746 6.40435  10
  -8   2   0 167.265 7.64116   2
  -8  -2   0 162.736 9.37912   9
  -8   2   0 153.896 7.65626   5
  -8  -2   0 173.482 10.7275   8
  -8   2   0 166.039 6.77824   7
  -9  -2   0 -0.2019 1.36368   7
  -9   2   0 0.08221 2.12098   9
  -9  -2   0 -0.9541 2.36669   8
  -9   2   0 -0.1772 2.19838   8
  -9   2   0 1.04612 1.48217   7
  -9  -2   0 0.81984 2.27438   9
  -9  -2   0 0.40120 2.23081   5
  -9  -2   0 -0.5536 1.18651  10
  -9   2   0 2.36527 2.04705   5
  -9  -2   0 0.92379 1.58289   2
  -9   2   0 -0.3295 1.23312  10
  -9   2   0 0.00817 1.56299   2
 -10   2   0 268.861 11.7609   2
 -10  -2   0 280.578 10.2346  10
 -10  -2   0 284.316 16.0246   8
 -10  -2   0 292.129 14.8956   9
 -10   2   0 290.648 10.4618  10
 -10   2   0 287.226 15.2129   9
 -10  -2   0 269.094 10.4251   7
 -10  -2   0 281.682 11.7079   2
 -10   2   0 282.372 10.6678   7
 -11   2   0 1.21746 1.67327  10
 -11  -2   0 1.69879 1.76733   7
 -11  -2   0 1.14453 2.85344   9
 -11  -2   0 -0.4193 1.69638   2
 -11   2   0 0.13096 1.96581   2
 -11  -2   0 0.76322 1.60134  10
 -11   2   0 2.92380 1.99531   7
   0  -3   0 0.02364 0.44552   8
   0  -3   0 0.09949 0.34660   9
   0  -3   0 -0.0077 0.41604   1
   0   3   0 -0.0172 0.23196   4
   0   3   0 0.00422 0.20895   5
   0   3   0 -0.0931 0.35142   3
   0  -3   0 0.04306 0.35920   3
   0   3   0 0.09995 0.44253   8
   0  -3   0 0.05736 0.24459   4
   0  -3   0 0.00097 0.30922   9
   0   3   0 -0.0893 0.49135   1
   0  -3   0 -0.3692 0.19228   5
   1  -3   0 1546.73 42.5594   9
   1  -3   0 1702.35 41.9239   5
  -1  -3   0 1753.35 42.4123   1
  -1   3   0 1637.12 42.2012   7
   1   3   0 1649.05 43.2592   8
  -1   3   0 1698.37 43.1051   1
   1  -3   0 1702.36 42.8311   9
   1   3   0 1698.18 42.8100   5
  -1   3   0 1693.90 42.7175   8
   1   3   0 1741.56 44.8707   1
   1  -3   0 1703.92 41.9475   7
   1  -3   0 1719.57 42.1672  10
   1  -3   0 1663.60 42.1207   8
  -1   3   0 1671.17 41.8400   2
  -1   3   0 1730.73 41.6095  10
   1  -3   0 1688.27 42.9483   2
   1  -3   0 1666.54 42.1282   4
  -1  -3   0 1699.31 42.7386   9
  -1  -3   0 1585.40 43.2226   8
  -1  -3   0 1747.86 42.4352   9
   1  -3   0 1757.55 42.5346   9
  -1   3   0 1634.80 42.2415   2
  -1   3   0 1647.87 42.8667   4
  -1   3   0 1691.86 42.6401   9
  -1   3   0 1692.70 41.8607   2
  -1  -3   0 1643.05 41.9722   5
   1  -3   0 1654.69 41.9155   2
  -2   3   0 1.90823 0.85749   1
  -2   3   0 3.32609 0.80167   2
  -2   3   0 1.78467 0.48470   5
  -2   3   0 2.24484 0.50009  10
  -2  -3   0 3.10584 0.42626   2
  -2  -3   0 2.86597 0.76647   9
  -2  -3   0 3.32702 0.84971   5
  -2   3   0 3.02948 0.81921   4
  -2   3   0 2.86100 0.57869   7
   2  -3   0 1.62201 0.86054   1
   2  -3   0 3.15771 0.68889   2
   2   3   0 2.09032 0.51534   1
  -2  -3   0 2.86481 1.16200   8
   2  -3   0 2.32246 0.63895   2
  -2   3   0 2.12679 0.92250   9
  -2  -3   0 3.00486 1.03152   8
   2  -3   0 2.93333 0.53883  10
   2   3   0 2.86243 0.77308   5
   2   3   0 3.13894 1.06134   8
  -2  -3   0 2.30545 0.38605   2
   2   3   0 2.56390 0.55879   4
  -2   3   0 3.10247 0.78731   8
   2  -3   0 1.95906 0.82706   9
  -2  -3   0 2.42896 0.55452   1
  -2  -3   0 3.48898 0.79122   9
   2  -3   0 3.32557 0.79949   8
   2  -3   0 3.43618 0.60084   5
   2  -3   0 2.29620 0.74006   4
  -3   3   0 1153.82 29.4282   5
  -3  -3   0 1114.01 32.0770   8
   3  -3   0 1132.18 30.2427   8
  -3   3   0 1128.59 30.1450   4
   3  -3   0 1159.53 28.9206  10
  -3  -3   0 1030.65 28.2486  10
  -3  -3   0 1187.94 29.0755   2
  -3  -3   0 1147.08 30.0553   5
  -3   3   0 1177.76 30.6943   1
   3  -3   0 1198.95 29.6777   2
   3  -3   0 1179.18 30.9496   9
   3  -3   0 1127.99 30.1813   4
  -3   3   0 1148.81 29.6866   2
  -3   3   0 1159.13 31.1537   9
   3   3   0 1141.49 30.0881   5
  -3  -3   0 1080.99 28.4468   7
   3   3   0 1111.84 31.9557   8
  -3  -3   0 1168.43 30.1073   9
  -3  -3   0 1162.30 28.9405   2
   3  -3   0 1155.33 30.6453   1
  -3  -3   0 1081.96 28.4065   7
   3  -3   0 1159.30 29.4237   5
  -3  -3   0 1141.84 30.1979   9
  -3   3   0 1213.66 29.0787  10
  -3   3   0 1121.62 30.3866   8
  -3   3   0 1137.34 29.1053   7
   3   3   0 1140.07 29.4548   4
  -3  -3   0 1158.60 31.8579   8
  -4  -3   0 72.3911 3.80333   5
  -4  -3   0 68.2875 3.08346   2
   4   3   0 72.0588 3.86011   5
   4  -3   0 55.2796 4.03825   9
  -4   3   0 62.7825 3.83020   1
  -4   3   0 68.4153 2.96323  10
   4   3   0 77.7171 3.50879   4
   4  -3   0 68.8202 3.86599   4
  -4   3   0 88.0774 4.52374   8
  -4   3   0 69.8262 3.38555   5
   4  -3   0 76.9664 3.53088   5
  -4   3   0 85.5397 4.16948   4
  -4  -3   0 75.2568 3.99522   9
  -4   3   0 67.2273 3.03381   7
  -4  -3   0 60.4459 2.59715   7
  -4  -3   0 59.8273 2.93742   2
  -4   3   0 89.4862 4.98967   9
  -4  -3   0 86.3198 4.26607   9
  -4  -3   0 66.3054 2.52232  10
   4  -3   0 56.7057 3.23631   2
  -4   3   0 77.8110 3.65245   2
  -5  -3   0 5.75990 1.74987   9
  -5  -3   0 7.10833 2.44625   8
   5  -3   0 7.84245 1.53836   2
   5   3   0 5.43441 1.72256   5
  -5  -3   0 6.14268 1.24997   2
   5   3   0 8.66949 2.92504   9
   5  -3   0 7.47013 1.83430   4
  -5   3   0 8.41132 1.32439  10
   5  -3   0 6.67178 1.49746   5
  -5  -3   0 6.91647 1.19510   7
   5  -3   0 7.46806 1.94878   8
   5   3   0 5.78541 1.06589   2
   5  -3   0 8.01478 1.18923  10
  -5   3   0 8.65482 2.07794   8
  -5   3   0 4.86762 1.79184   9
   5  -3   0 6.57504 1.98906   9
  -5   3   0 5.47931 1.76711   8
  -5  -3   0 10.3355 1.60000   2
  -5   3   0 5.97104 1.40269   2
  -5   3   0 6.99285 1.56224   5
  -5   3   0 9.19280 1.42540   7
  -5   3   0 8.36364 1.76542   1
   5   3   0 6.95461 1.54024   4
  -5  -3   0 6.89426 1.67620   5
  -6   3   0 14.3974 3.23183   9
  -6  -3   0 15.0354 3.55708   8
  -6  -3   0 15.7555 3.02769   9
  -6  -3   0 9.83652 1.51408   7
  -6   3   0 8.62975 1.52115   7
   6  -3   0 7.59116 1.96660   4
  -6   3   0 13.9069 2.24992   1
   6  -3   0 10.1893 1.38946  10
  -6   3   0 12.4626 2.13186   5
   6  -3   0 11.4100 2.30729   5
   6  -3   0 12.1430 2.52862   8
  -6  -3   0 11.2122 1.53562  10
  -6   3   0 14.4602 2.92647   8
  -6  -3   0 11.7789 2.42843   5
  -6  -3   0 11.8192 1.94925   2
  -6   3   0 12.2402 2.75262   8
  -6   3   0 8.45194 1.46663  10
  -6   3   0 11.2203 2.07942   2
   6  -3   0 6.75852 1.67667   2
   6  -3   0 7.63141 2.30897   9
  -7   3   0 1.68157 1.37147   2
  -7  -3   0 2.00233 1.29034   2
  -7   3   0 0.94593 1.25422   1
  -7   3   0 2.55915 1.43935   5
  -7  -3   0 2.38282 2.22033   8
  -7   3   0 3.33538 1.34460   7
  -7  -3   0 1.75661 1.02983  10
  -7   3   0 0.56247 1.63211   9
  -7  -3   0 2.50506 1.65493   5
  -7  -3   0 3.12241 1.19827   7
  -7  -3   0 0.43484 1.56195   9
   7  -3   0 2.12617 1.75289   8
   7  -3   0 2.44730 0.97654  10
   7  -3   0 2.98091 1.51036   2
  -7   3   0 3.01906 1.96417   8
  -7   3   0 1.24466 1.00485  10
  -8   3   0 -0.2876 1.17241   7
  -8  -3   0 0.09096 1.18418   7
  -8  -3   0 0.18892 2.06046   8
  -8  -3   0 -1.0775 1.57138   5
  -8   3   0 -0.1114 1.93199   8
  -8   3   0 0.87346 1.43598   2
  -8  -3   0 0.49940 1.81143   9
  -8  -3   0 -0.0728 1.22256   2
   8  -3   0 0.50783 0.96471  10
  -8   3   0 -0.3158 1.84958   9
   8  -3   0 0.21104 1.82697   8
  -8   3   0 -0.1509 1.31616   5
  -8  -3   0 -0.3386 1.07182  10
  -8   3   0 1.30157 1.22773  10
  -9  -3   0 49.3316 3.66694   7
  -9   3   0 43.8998 5.71030   8
  -9   3   0 46.3521 3.53353  10
  -9   3   0 43.5870 4.29846   2
  -9  -3   0 44.6486 3.43102  10
  -9   3   0 37.2275 4.14531   5
  -9   3   0 44.6557 5.99231   9
  -9  -3   0 46.7175 6.64825   8
  -9  -3   0 41.7480 3.99844   2
  -9   3   0 38.5692 3.49733   7
  -9  -3   0 41.7802 5.46371   9
 -10   3   0 9.13761 2.88198   2
 -10  -3   0 8.16088 2.08538  10
 -10  -3   0 9.87474 2.37514   7
 -10  -3   0 12.2425 3.98733   9
 -10   3   0 7.01243 2.06305  10
 -10  -3   0 12.9641 3.06314   2
 -10  -3   0 11.2089 4.35569   8
 -10   3   0 12.1465 2.62822   7
 -11   3   0 136.879 6.87472  10
 -11  -3   0 136.453 8.09218   2
 -11   3   0 144.795 7.35671   7
 -11  -3   0 126.208 10.3102   9
 -11  -3   0 142.844 7.19207   7
 -11  -3   0 139.178 6.84390  10
   0  -4   0 125.711 4.14414   9
   0   4   0 130.504 4.70713   8
   0   4   0 124.751 3.59865   4
   0  -4   0 134.196 4.35228   3
   0   4   0 119.097 3.47562   5
   0  -4   0 122.904 3.46330   5
   0   4   0 136.371 4.41917   3
   0  -4   0 108.809 4.70514   1
   0  -4   0 139.194 4.81387   8
   0  -4   0 113.999 3.92232   9
   0  -4   0 115.034 3.69363   4
   0   4   0 110.127 4.75687   1
   1  -4   0 0.28982 0.41506   2
   1   4   0 0.29349 0.60559   1
   1  -4   0 -0.0059 0.27260   7
   1  -4   0 0.06046 0.61015   9
   1   4   0 0.16657 0.24541   4
  -1   4   0 -0.0139 0.72619   1
  -1  -4   0 0.67709 0.75395   8
  -1  -4   0 0.19540 0.43216   5
   1  -4   0 0.43052 0.40042   2
   1  -4   0 -0.1103 0.54735   9
  -1   4   0 0.10002 0.15055   4
  -1   4   0 0.18246 0.29370   2
   1  -4   0 0.24367 0.44340   4
  -1  -4   0 0.32667 0.34404   9
   1  -4   0 0.13264 0.37480   2
  -1   4   0 0.16297 0.48129   8
   1  -4   0 0.00459 0.22648  10
   1   4   0 0.31755 0.69702   8
  -1   4   0 0.07686 0.25081   9
  -1  -4   0 0.25997 0.42517   9
   1   4   0 0.57615 0.43745   5
  -1   4   0 0.04273 0.29723   2
   1  -4   0 0.25543 0.54781   8
   1  -4   0 0.11010 0.67564   1
  -1  -4   0 0.26439 0.56365   1
   2  -4   0 53.8893 2.00386   5
   2  -4   0 52.1992 2.41147   2
  -2  -4   0 50.3657 2.42185   1
  -2   4   0 52.1294 1.99583   7
  -2   4   0 51.5621 3.12186   9
   2   4   0 54.8719 3.60505   8
  -2   4   0 55.5660 3.18214   9
   2  -4   0 54.6288 2.56358   8
  -2  -4   0 51.9570 3.56636   8
   2   4   0 51.8200 2.56850   5
   2  -4   0 48.0693 2.90200   9
   2  -4   0 50.9871 1.94211  10
  -2  -4   0 51.0047 2.50849   9
  -2   4   0 55.1200 2.48492   2
   2   4   0 49.8792 2.41868   1
  -2   4   0 53.7021 1.98540  10
  -2  -4   0 49.5701 2.52825   5
  -2  -4   0 54.9544 2.41123   9
  -2   4   0 48.3845 2.56415   4
   2  -4   0 55.8406 2.40338   2
  -2   4   0 52.9879 2.60960   8
  -2   4   0 48.6747 3.17034   1
   2  -4   0 55.1276 2.72608   4
  -2  -4   0 54.3163 3.45573   8
   2   4   0 52.3372 2.00111   4
  -2   4   0 56.8938 2.01999   5
  -3  -4   0 -0.0222 0.39252   2
  -3  -4   0 0.43236 1.03964   8
  -3   4   0 0.35020 0.64518   2
   3  -4   0 0.80380 0.56272   5
  -3  -4   0 1.11806 0.74739   9
  -3  -4   0 0.27910 0.66710   5
  -3   4   0 0.57752 0.74017   8
  -3  -4   0 0.10036 0.46391   1
   3  -4   0 0.64329 0.74991   4
  -3   4   0 0.12107 0.71350   4
  -3   4   0 0.77590 0.57041   5
   3   4   0 0.41552 0.44678   1
  -3  -4   0 1.00536 1.11970   8
  -3   4   0 0.55601 0.92830   1
  -3   4   0 0.89109 0.54874  10
   3   4   0 1.43687 1.25338   8
   3   4   0 0.40038 0.50078   4
   3   4   0 0.66146 0.75800   5
  -3  -4   0 0.56883 0.45149   2
   3  -4   0 0.32586 0.60578   2
   3  -4   0 0.18991 0.70442   8
   3  -4   0 0.20868 0.84496   9
  -3   4   0 0.40647 0.93952   9
   3  -4   0 0.71878 0.50259  10
  -3  -4   0 1.30848 0.74585   9
  -3   4   0 0.71725 0.55460   7
  -4   4   0 1155.47 31.5333   8
  -4   4   0 1177.53 30.2222   5
  -4  -4   0 1168.25 33.3114   8
  -4  -4   0 1187.20 33.9820   8
  -4  -4   0 1160.47 31.0220   5
  -4   4   0 1155.01 31.7614   1
  -4  -4   0 1178.18 29.7732   2
   4   4   0 1140.63 31.0499   5
   4  -4   0 1161.90 30.4676   2
   4   4   0 1110.64 30.0546   4
   4  -4   0 1158.45 32.2354   9
   4  -4   0 1149.51 29.5029  10
   4   4   0 1159.11 33.7207   8
   4  -4   0 1121.66 31.1381   4
  -4  -4   0 1144.38 29.5943   2
  -4  -4   0 1192.42 31.1895   9
   4  -4   0 1191.21 31.3765   8
  -4   4   0 1153.64 29.7648   7
  -4   4   0 1161.79 29.6487  10
  -4   4   0 1167.70 31.2716   4
   4  -4   0 1155.08 30.1956   5
  -4   4   0 1164.18 32.5126   9
  -4  -4   0 1144.42 31.2336   9
  -4  -4   0 1093.80 28.9724   7
  -4   4   0 1162.65 30.6190   2
  -4  -4   0 1075.34 28.7921  10
   5  -4   0 -0.3500 1.16847   9
  -5  -4   0 0.06953 0.53262  10
  -5  -4   0 -0.0446 0.68296   2
  -5   4   0 0.86600 0.94116   2
   5  -4   0 -0.0993 0.83917   5
  -5   4   0 0.36717 1.12105   8
  -5  -4   0 -0.1260 0.73743   2
   5  -4   0 0.15318 1.05415   8
  -5  -4   0 -0.0202 0.68013   7
   5  -4   0 -0.5589 0.86941   4
  -5   4   0 0.39985 1.42603   9
  -5   4   0 -0.2791 0.69011   7
  -5  -4   0 -0.0692 0.96055   5
  -5   4   0 0.21078 1.06795   8
   5  -4   0 0.20799 0.68914  10
  -5  -4   0 -0.1976 1.02699   9
   5   4   0 0.22214 0.81619   4
  -5   4   0 1.05119 1.21011   1
  -5  -4   0 0.15633 0.96970   9
  -5  -4   0 0.64060 1.55458   8
  -5   4   0 0.30810 0.87588   5
   5  -4   0 0.77809 0.99719   2
  -5   4   0 0.40825 0.70529  10
  -6   4   0 226.056 7.61112  10
  -6   4   0 218.451 7.73042   7
  -6   4   0 239.194 10.8183   9
   6  -4   0 227.276 8.48816   5
   6  -4   0 224.184 8.41300   2
  -6  -4   0 222.529 9.08927   5
  -6   4   0 239.223 9.25316   1
  -6   4   0 239.062 8.74604   2
  -6  -4   0 242.869 11.8823   8
  -6  -4   0 229.308 8.07509   2
  -6  -4   0 240.888 9.79309   9
  -6   4   0 242.351 10.1818   8
  -6  -4   0 196.720 7.03416  10
   6  -4   0 246.218 9.88669   8
   6  -4   0 216.452 10.1541   9
  -6  -4   0 225.860 7.34142   7
  -6   4   0 234.723 8.53509   5
  -6   4   0 257.750 10.3703   8
   6  -4   0 218.699 9.17501   4
  -7   4   0 -0.7021 0.79873  10
  -7   4   0 -0.5380 1.69208   9
  -7  -4   0 -1.3782 0.98548   5
  -7  -4   0 -0.3270 0.97012   2
  -7   4   0 -0.5526 1.18140   1
  -7   4   0 -0.8152 1.09203   2
   7  -4   0 -0.2577 1.35377   8
   7  -4   0 -0.4638 1.57462   9
  -7  -4   0 -0.2857 0.82340  10
  -7  -4   0 0.18676 1.90555   8
  -7   4   0 0.65789 1.58651   8
  -7   4   0 -0.7416 1.08105   5
  -7  -4   0 -0.2067 0.92253   7
   7  -4   0 -0.4113 0.83626  10
  -7  -4   0 0.18226 1.51371   9
  -7   4   0 -0.1208 0.97914   7
   7  -4   0 -0.6219 1.11078   2
  -8   4   0 418.319 13.1388   7
  -8  -4   0 422.257 18.7406   8
  -8   4   0 435.009 16.8139   8
  -8  -4   0 394.306 14.8609   5
  -8  -4   0 400.099 12.6958   7
  -8   4   0 399.515 14.1201   5
  -8   4   0 399.776 14.2057   2
  -8   4   0 428.841 17.5202   9
  -8  -4   0 411.018 13.7114   2
  -8   4   0 411.306 12.8536  10
   8  -4   0 406.951 15.9747   8
   8  -4   0 382.053 11.8330  10
  -8  -4   0 416.642 16.3123   9
  -8  -4   0 413.178 12.5602  10
  -9  -4   0 -0.5509 1.45900   2
  -9  -4   0 0.06424 2.20794   9
  -9  -4   0 -1.3387 1.17985  10
  -9   4   0 1.36348 1.49164   7
  -9   4   0 1.82830 2.56191   9
  -9   4   0 -0.7740 1.56169   2
  -9  -4   0 1.40943 1.43303   7
  -9   4   0 -0.4744 1.78598   5
  -9   4   0 0.27315 1.27465  10
  -9  -4   0 -1.3047 2.22806   8
 -10  -4   0 15.6049 3.23146   2
 -10   4   0 15.1122 3.53973   2
 -10  -4   0 12.6650 3.97791   9
 -10  -4   0 11.0040 2.40921  10
 -10  -4   0 17.5231 2.88693   7
 -10   4   0 12.4799 2.46612  10
 -10   4   0 16.2545 2.93899   7
 -11   4   0 -0.4050 1.47916  10
 -11   4   0 -0.1398 1.68518   7
 -11  -4   0 0.70388 1.74463   7
 -11  -4   0 -2.5243 2.27730   9
 -11  -4   0 0.23400 1.83209   2
 -11  -4   0 1.30466 1.77287  10
   0  -5   0 0.65108 0.55199   3
   0  -5   0 0.56300 0.50931   9
   0   5   0 0.80230 0.33385   5
   0   5   0 0.80314 0.65389   8
   0   5   0 0.42897 0.34076   4
   0  -5   0 0.22748 0.37956   4
   0   5   0 0.19917 0.68420   1
   0  -5   0 0.91929 0.71351   8
   0   5   0 0.58401 0.69539   3
   0  -5   0 0.75529 0.57730   9
   0  -5   0 0.12417 0.72482   1
   0  -5   0 0.86630 0.32105   5
   1  -5   0 2140.56 53.2245   8
   1   5   0 2231.01 56.0404   1
   1  -5   0 2086.98 52.4035   2
  -1   5   0 2066.09 51.9112   2
  -1   5   0 2070.49 53.4042   9
   1   5   0 2038.62 52.1446   4
  -1   5   0 2076.82 52.6068   4
   1   5   0 2029.37 52.4849   5
   1  -5   0 2107.47 51.9310   7
  -1  -5   0 2017.49 53.4336   3
   1  -5   0 2051.72 53.4471   9
   1  -5   0 2063.49 53.0464   2
   1  -5   0 2221.34 53.4052   9
   1  -5   0 2120.69 52.3026   7
  -1   5   0 2127.29 54.5426   1
  -1  -5   0 2084.94 54.5354   8
   1  -5   0 2055.99 52.7458   4
   1   5   0 2015.46 54.2675   8
  -1  -5   0 2090.68 52.4270   9
  -1  -5   0 2198.11 53.8569   1
  -1  -5   0 2103.13 52.5058   5
  -1  -5   0 2204.05 52.6448   9
  -1   5   0 2180.29 53.2238   8
   1  -5   0 2110.95 52.0935  10
   2   5   0 281.227 7.01588   4
  -2   5   0 276.474 8.98224   9
  -2   5   0 284.490 8.18595   4
   2  -5   0 262.025 7.81647   2
   2  -5   0 282.814 8.06776   8
  -2   5   0 251.235 6.98448   7
  -2  -5   0 264.393 7.98166   5
   2  -5   0 269.022 6.96842   5
   2  -5   0 248.626 7.03653  10
   2   5   0 214.395 7.88832   1
  -2  -5   0 213.070 7.65255   9
  -2   5   0 250.241 7.66166   2
   2  -5   0 272.572 8.20766   4
  -2   5   0 244.672 7.96927   8
  -2   5   0 229.739 6.87387  10
   2   5   0 265.301 7.99898   5
  -2  -5   0 276.029 9.95627   8
  -3  -5   0 1.99418 0.87891   1
  -3   5   0 5.01205 0.88729   7
   3  -5   0 4.28501 1.50006   9
  -3   5   0 3.56069 0.78582   5
   3   5   0 4.73434 1.84502   8
  -3  -5   0 2.41404 0.89551   9
   3   5   0 3.87166 0.78310   4
  -3   5   0 4.55687 1.28910   4
   3   5   0 2.02573 0.80341   1
   3  -5   0 3.26056 0.99879   2
   3  -5   0 3.99415 1.06691   8
  -3  -5   0 2.82263 0.59676   2
   3  -5   0 3.02236 0.80082   5
   3  -5   0 3.66307 0.77208  10
  -3   5   0 4.98296 0.83588  10
  -3  -5   0 2.83501 1.11379   5
  -3  -5   0 3.03818 1.60805   8
  -3  -5   0 2.81793 0.56794   2
   3   5   0 2.91323 1.14889   5
  -3   5   0 2.92078 1.44746   9
   3  -5   0 1.30472 0.97503   4
  -3   5   0 2.81578 0.98663   2
  -3  -5   0 3.84903 1.13909   9
  -3   5   0 4.72747 1.67750   9
  -3   5   0 3.13289 1.05002   8
  -3   5   0 2.66301 1.46387   1
  -3  -5   0 2.80141 1.54390   8
   4   5   0 1.95164 1.16601   5
  -4  -5   0 2.21209 0.79715   2
  -4  -5   0 3.58854 1.81208   8
  -4   5   0 2.83480 0.94820   5
  -4   5   0 2.80767 1.48217   1
  -4   5   0 3.56988 1.33611   4
   4  -5   0 2.70870 0.86837  10
  -4   5   0 2.37833 0.86749  10
  -4   5   0 1.92041 0.82092   7
   4   5   0 4.08918 2.12702   8
  -4  -5   0 3.48199 1.22010   9
  -4  -5   0 2.56423 1.54184   8
   4  -5   0 2.82974 1.27213   4
  -4   5   0 1.39504 0.97811   2
   4  -5   0 3.81511 1.26680   8
  -4  -5   0 2.87403 1.17730   5
  -4  -5   0 1.98586 0.57074   7
  -4   5   0 5.81251 2.02390   9
   4   5   0 3.47232 0.94373   4
  -4   5   0 3.36493 1.27215   8
  -4  -5   0 2.80991 1.23178   9
   4  -5   0 2.95068 0.96373   5
   4   5   0 3.21804 0.63465   1
   4  -5   0 0.58693 1.24167   9
   4  -5   0 2.80726 1.16383   2
  -4  -5   0 2.08737 0.72319   2
  -4  -5   0 2.50543 0.63675   1
  -5   5   0 2.97111 1.25741   2
   5  -5   0 2.27360 1.66396   9
  -5  -5   0 3.20865 1.35992   9
  -5   5   0 2.96831 1.42178   8
  -5   5   0 3.12870 1.02209   7
   5   5   0 3.58064 1.11540   4
  -5   5   0 3.32616 1.00635  10
  -5   5   0 0.85423 0.93544   5
  -5   5   0 1.54203 1.33976   1
  -5  -5   0 1.86175 0.87063   2
  -5   5   0 4.20089 1.84927   9
   5  -5   0 1.02397 0.82068  10
  -5  -5   0 2.59237 1.39856   5
  -5  -5   0 2.93690 0.82865   7
  -5  -5   0 2.96223 0.99010   2
   5  -5   0 2.82004 1.30585   8
  -5  -5   0 1.96692 1.71530   8
   5  -5   0 2.07760 1.12346   2
  -5  -5   0 3.62142 1.39719   9
   5  -5   0 2.79493 1.10993   5
   5  -5   0 2.60842 1.34184   4
  -5  -5   0 2.95646 0.72378  10
  -6   5   0 23.2925 3.20160   8
  -6   5   0 28.7101 3.95987   9
  -6  -5   0 25.9922 3.16399   9
   6  -5   0 19.5467 1.89070  10
  -6   5   0 24.6863 3.08306   1
  -6  -5   0 18.5667 2.05335   2
   6  -5   0 15.0541 2.29191   2
  -6   5   0 20.3296 2.03085   7
   6  -5   0 28.7096 3.21071   8
  -6   5   0 21.8249 2.62849   2
  -6  -5   0 21.4255 1.81501   7
   6  -5   0 15.4227 3.09469   9
  -6   5   0 20.4417 2.00504  10
  -6  -5   0 20.0590 1.67060  10
  -6   5   0 19.6549 2.47035   5
  -6  -5   0 22.2369 2.98864   5
  -6  -5   0 20.1469 2.13366   2
   6  -5   0 23.5241 2.91707   4
  -6  -5   0 19.4237 3.91815   8
   6  -5   0 22.7633 2.43886   5
  -7  -5   0 -0.4018 1.42015   5
  -7   5   0 -0.2707 0.88751  10
  -7  -5   0 -0.0719 0.87119  10
   7  -5   0 0.30719 0.98522  10
   7  -5   0 -0.1192 1.27972   2
  -7  -5   0 0.41820 1.05632   2
  -7   5   0 0.11281 1.70613   9
  -7   5   0 -0.1141 1.46985   8
  -7   5   0 0.40726 1.04061   7
  -7   5   0 1.04685 1.32644   2
  -7   5   0 0.95807 1.29257   5
  -7  -5   0 0.99696 2.10641   8
  -7  -5   0 0.49995 1.51107   9
  -7   5   0 0.94037 1.49782   1
   7  -5   0 1.83396 2.06098   9
   7  -5   0 0.46182 1.53751   8
  -7  -5   0 1.13401 1.04008   7
  -8  -5   0 24.7590 4.51709   9
  -8   5   0 18.0216 3.68350   8
  -8   5   0 15.9782 2.96790   2
  -8   5   0 15.9050 2.88704   5
  -8  -5   0 13.6801 2.07977  10
  -8  -5   0 16.4172 2.32196   7
  -8   5   0 13.9060 3.71286   9
   8  -5   0 13.1148 1.90663  10
  -8   5   0 17.7167 2.56348   7
  -8  -5   0 18.7752 2.87467   2
   8  -5   0 16.6480 3.41106   8
  -8   5   0 11.4786 2.06377  10
  -8  -5   0 13.9008 3.08095   5
  -8  -5   0 21.0063 5.04565   8
  -9   5   0 14.5689 2.58892   7
  -9  -5   0 13.3320 3.78827   9
  -9  -5   0 11.5498 2.62257   2
  -9  -5   0 13.4929 2.29599  10
  -9  -5   0 14.2762 4.59810   8
  -9  -5   0 12.4346 2.33032   7
  -9   5   0 12.0920 2.91363   5
  -9   5   0 15.4292 2.49738  10
  -9   5   0 13.3289 3.04657   2
 -10   5   0 1.17855 1.67774   7
 -10  -5   0 3.32705 1.75204   7
 -10  -5   0 1.29258 1.83776   2
 -10  -5   0 4.05277 2.92757   9
 -10   5   0 3.04994 1.69161  10
 -10  -5   0 2.42358 1.62397  10
 -11   5   0 1.78097 1.88131   7
 -11   5   0 0.71673 1.56301  10
 -11  -5   0 2.24094 2.97166   9
 -11  -5   0 2.26095 2.15203   2
 -11  -5   0 2.24195 1.77220  10
 -11  -5   0 4.36168 1.95048   7
   0  -6   0 1073.70 26.3599   5
   0   6   0 1051.86 28.9638   1
   0  -6   0 1039.62 28.4309   8
   0   6   0 1050.62 26.3872   5
   0  -6   0 1042.07 27.5123   9
   0   6   0 1030.99 28.3449   8
   0   6   0 1044.57 26.5088   4
   0  -6   0 1053.55 26.8409   4
   0  -6   0 1084.27 27.3425   9
   1  -6   0 0.10227 0.50786   4
   1  -6   0 0.02314 0.36456   2
  -1  -6   0 0.47315 0.53578   3
  -1  -6   0 0.14056 0.44506   5
   1   6   0 0.16728 0.49480   5
   1   6   0 0.23002 0.21677   4
  -1   6   0 0.38319 0.49182   4
   1   6   0 -0.1452 0.71030   1
  -1  -6   0 0.32354 0.49227   9
  -1   6   0 0.41214 0.88668   1
  -1  -6   0 0.39458 0.83809   8
   1  -6   0 0.26540 0.68970   9
   1  -6   0 0.45042 0.21629  10
   1  -6   0 0.34019 0.30320   7
   1  -6   0 0.19997 0.66103   8
   1  -6   0 0.37829 0.29006   7
  -1   6   0 0.04492 0.60630   8
   1  -6   0 0.51911 0.67447   9
  -1  -6   0 0.19086 0.51413   9
   1  -6   0 -0.0719 0.22849  10
   1  -6   0 0.47351 0.50581   2
  -1  -6   0 0.00306 0.43252   4
   1   6   0 0.07058 0.76297   8
  -2  -6   0 1585.12 42.9978   8
   2   6   0 1541.46 42.7266   8
   2  -6   0 1554.61 40.1461   2
   2  -6   0 1588.39 40.6067   4
  -2   6   0 1567.43 40.4072   4
   2   6   0 1587.79 41.0322   1
   2  -6   0 1541.17 41.2551   9
   2  -6   0 1569.62 39.2166  10
   2   6   0 1558.05 38.9367   4
  -2  -6   0 1588.13 40.2965   9
  -2   6   0 1584.99 41.5074   9
   2   6   0 1541.78 38.8981   4
   2  -6   0 1600.08 40.4591   8
   2   6   0 1530.35 40.2633   5
  -2  -6   0 1596.70 42.5205   8
   2  -6   0 1584.21 39.9219   2
  -2   6   0 1546.85 39.7953   2
  -2   6   0 1590.63 42.4789   1
   2  -6   0 1566.96 38.9202   5
  -2   6   0 1564.66 38.9769   7
  -2  -6   0 1521.90 40.8693   1
  -2  -6   0 1605.74 40.3091   5
  -2  -6   0 1601.71 39.9764   9
  -2   6   0 1615.95 40.5754   8
  -2   6   0 1583.08 38.9287   7
   3  -6   0 1.15094 0.86508   8
   3  -6   0 1.27832 0.62276  10
  -3   6   0 1.70557 0.99913   8
  -3   6   0 1.80306 1.34389   9
  -3  -6   0 1.52126 1.00130   5
   3  -6   0 1.92398 1.26086   9
   3   6   0 1.85445 0.98285   5
  -3   6   0 0.77724 0.59953   5
  -3  -6   0 0.51646 1.34870   8
   3  -6   0 0.47940 0.81096   2
  -3   6   0 1.71365 0.64615  10
  -3  -6   0 0.71340 0.89448   1
   3  -6   0 1.01176 0.61781   5
  -3   6   0 0.92712 0.90286   4
  -3  -6   0 1.75937 0.84475   9
  -3  -6   0 1.19906 0.43179   2
  -3   6   0 0.47861 0.58865   7
   3   6   0 1.67342 0.93776   1
   3   6   0 2.56828 1.65397   8
  -3   6   0 1.82556 1.47565   1
  -3  -6   0 1.38217 0.93535   9
   3   6   0 1.18814 0.57002   4
   3  -6   0 1.33666 0.94445   4
  -3   6   0 1.97911 1.42569   9
  -3   6   0 1.44674 0.89736   2
  -3  -6   0 1.87834 1.54575   8
  -4   6   0 91.0717 5.54505   9
  -4   6   0 79.9656 4.30033   8
  -4  -6   0 80.4033 4.25551   5
  -4   6   0 71.8822 4.98433   1
   4   6   0 83.7918 3.32734   1
  -4   6   0 79.3034 3.31363   7
  -4  -6   0 80.0059 4.27738   9
   4   6   0 78.7213 3.29890   4
  -4  -6   0 72.0162 2.98912   2
  -4   6   0 80.4300 3.45200   5
  -4   6   0 74.2290 3.18254  10
  -4  -6   0 86.9303 4.26113   9
   4  -6   0 80.2963 4.43756   4
   4  -6   0 81.5832 3.47419   5
   4  -6   0 72.8562 4.90225   9
  -4  -6   0 83.1029 5.97223   8
  -4   6   0 79.4245 4.01744   2
   4  -6   0 91.5926 4.29490   8
  -4   6   0 79.7205 4.35673   4
   4   6   0 82.3564 4.36575   5
  -4   6   0 85.6277 5.35868   9
   4  -6   0 78.0326 3.25387  10
  -4  -6   0 79.0885 3.31590   1
   4  -6   0 69.2950 3.77152   2
  -4  -6   0 75.6566 3.14667   2
   5  -6   0 0.11491 0.95291   8
  -5   6   0 0.53341 0.82488   5
   5  -6   0 0.80407 0.85791  10
  -5   6   0 0.10511 0.94775   2
   5  -6   0 -0.2641 0.78093   5
  -5  -6   0 -0.2316 1.38972   8
  -5  -6   0 1.12000 1.16517   9
  -5   6   0 0.12477 0.77788  10
  -5  -6   0 0.25157 0.62110   7
  -5   6   0 0.61695 1.41900   9
  -5  -6   0 0.59791 0.98930   9
  -5   6   0 0.04093 0.99351   8
  -5  -6   0 0.15916 0.70993   2
  -5   6   0 -0.3360 1.22318   1
  -5   6   0 0.35356 0.73688   7
  -5  -6   0 0.52613 0.51520  10
  -5  -6   0 0.52721 0.70986   2
   5  -6   0 -0.3539 0.87296   2
   5  -6   0 0.76091 1.14814   4
   5  -6   0 -0.3615 1.24413   9
   5   6   0 -0.0744 0.74109   4
  -5  -6   0 0.15861 0.97770   5
  -6  -6   0 2077.30 51.3078  10
  -6   6   0 2064.09 55.3699   1
  -6   6   0 2020.90 56.9020   9
  -6  -6   0 2077.36 54.4347   5
  -6  -6   0 2020.59 54.7065   9
   6  -6   0 2080.70 54.5449   8
   6  -6   0 2016.20 51.8974  10
   6  -6   0 2050.95 53.4456   2
  -6   6   0 2025.27 52.9199   5
  -6  -6   0 2038.68 51.4789   7
  -6  -6   0 2035.90 52.5528   2
  -6   6   0 2082.24 54.9535   8
  -6   6   0 2039.99 52.1309  10
   6  -6   0 2032.34 56.3777   9
   6  -6   0 1991.59 52.8848   5
  -6   6   0 2109.04 53.8626   2
  -6  -6   0 2076.37 58.9923   8
  -6   6   0 1993.05 52.2416   7
   6  -6   0 2008.02 54.6068   4
  -6   6   0 1988.57 54.8433   8
  -7  -6   0 -0.2636 0.92495   7
   7  -6   0 -0.3020 1.32201   8
  -7   6   0 -0.2872 1.34156   8
  -7  -6   0 -1.7129 1.05896   5
   7  -6   0 -0.4711 0.89088  10
  -7   6   0 0.71216 1.05617   7
  -7  -6   0 0.08107 0.87537  10
  -7   6   0 -1.0328 1.10523   5
  -7   6   0 0.42076 1.35009   2
  -7  -6   0 -0.8924 0.96212   2
   7  -6   0 1.26834 1.98202   9
  -7  -6   0 0.52510 2.12802   8
  -7   6   0 -0.0306 1.49835   1
  -7   6   0 -0.4373 0.94044  10
   7  -6   0 -0.4316 1.23164   2
  -7   6   0 0.73206 2.05047   9
  -7  -6   0 0.04518 1.40172   9
  -8   6   0 296.250 11.4255   5
  -8  -6   0 314.232 16.2670   8
  -8  -6   0 313.150 11.2490   2
  -8   6   0 360.436 21.8147   9
   8  -6   0 318.377 13.1013   8
  -8   6   0 310.699 12.0503   2
  -8   6   0 318.914 10.5304  10
  -8  -6   0 298.385 12.5487   5
  -8   6   0 323.086 10.7974   7
  -8   6   0 306.835 12.5574   1
  -8  -6   0 324.121 13.7002   9
  -8  -6   0 312.025 10.2379   7
  -8  -6   0 312.256 10.0603  10
   8  -6   0 315.500 9.99914  10
  -9   6   0 -0.5459 1.22911  10
  -9  -6   0 -0.0884 1.36899   7
   9  -6   0 0.10984 1.16398  10
  -9  -6   0 -0.7244 1.41624   2
  -9  -6   0 -1.2034 1.97448   9
  -9   6   0 -0.5827 1.39719   7
  -9   6   0 0.99171 1.80654   5
  -9  -6   0 -0.8349 2.61777   8
  -9  -6   0 -0.3867 1.26428  10
 -10  -6   0 9.97151 2.35355   7
 -10   6   0 7.48492 2.23448   7
 -10  -6   0 6.66174 2.00102  10
 -10   6   0 4.77642 1.89542  10
 -10  -6   0 6.75026 3.37973   9
 -10  -6   0 6.50170 2.33424   2
 -11  -6   0 1.08463 1.73656  10
 -11  -6   0 -0.8634 1.75578   2
 -11   6   0 -1.9564 1.35249  10
 -11  -6   0 1.49885 2.72685   9
 -11  -6   0 1.22056 1.67567   7
 -11   6   0 1.70708 1.95547   7
   0  -7   0 0.59550 0.54948   4
   0   7   0 0.28361 0.92485   1
   0  -7   0 1.01766 0.76254   9
   0  -7   0 0.89020 0.88298   8
   0   7   0 0.71515 0.40955   4
   0  -7   0 1.16859 0.69945   9
   0   7   0 0.80432 0.40951   5
   0  -7   0 0.40114 0.35020   5
   0   7   0 0.68096 0.83830   8
   1  -7   0 1496.00 37.6308   2
   1  -7   0 1462.73 38.1493   4
  -1  -7   0 1445.75 40.3065   8
  -1  -7   0 1537.92 38.1829   9
   1  -7   0 1488.19 39.0344   8
   1   7   0 1442.16 37.7287   5
  -1  -7   0 1502.55 38.0818   9
   1  -7   0 1435.15 36.8663   7
   1  -7   0 1487.12 36.8113   7
  -1   7   0 1538.90 39.0112   8
   1  -7   0 1477.86 39.0619   9
   1  -7   0 1540.92 37.4131   2
  -1   7   0 1461.86 37.8400   4
  -1   7   0 1509.64 40.6334   1
   1  -7   0 1546.31 38.9580   9
  -1  -7   0 1496.28 37.5906   4
  -1  -7   0 1471.90 38.2799   3
   1   7   0 1446.60 40.1417   8
   1   7   0 1510.12 39.9260   1
  -1  -7   0 1488.66 37.7319   5
  -2  -7   0 9.75871 2.37073   8
   2  -7   0 5.26667 0.74256  10
  -2   7   0 3.87775 1.32457   9
   2  -7   0 5.14936 1.43965   9
   2   7   0 6.31728 1.22532   5
   2   7   0 3.91960 1.31453   1
  -2  -7   0 7.84701 1.22158   9
   2  -7   0 5.88913 1.28269   4
   2   7   0 8.07633 2.09494   8
   2  -7   0 6.86657 1.22240   2
  -2  -7   0 5.28432 1.11637   5
  -2  -7   0 3.33547 0.98087   9
  -2   7   0 2.54793 1.37074   1
  -2   7   0 5.41878 0.95870   2
   2  -7   0 4.91606 1.21101   8
   2  -7   0 4.60358 0.96160   2
  -2   7   0 4.28324 1.14570   8
  -2  -7   0 7.74714 1.94351   8
   3  -7   0 70.1830 4.50684   9
  -3  -7   0 78.3322 3.95596   1
   3  -7   0 68.2541 2.81744  10
   3   7   0 67.9759 5.26339   8
  -3  -7   0 74.1798 3.77658   9
   3   7   0 67.5254 2.46346   4
  -3   7   0 72.8955 3.81726   4
   3  -7   0 71.0522 3.90814   4
  -3   7   0 69.3819 3.72654   8
   3   7   0 74.6912 3.87914   1
   3  -7   0 66.4742 2.63360   5
  -3   7   0 69.9963 2.55577  10
  -3   7   0 73.2110 4.95138   1
  -3   7   0 67.5780 3.37053   2
  -3   7   0 72.2669 3.47299   2
   3  -7   0 72.7475 3.50630   2
  -3   7   0 68.6388 2.64085   7
   3  -7   0 68.9990 3.57846   8
  -3  -7   0 72.4500 3.50686   9
  -3   7   0 72.3490 4.71271   9
  -3  -7   0 68.8432 5.32044   8
   3   7   0 63.7513 3.61111   5
  -3  -7   0 69.2324 3.70250   5
  -3  -7   0 67.8232 5.04304   8
  -4   7   0 10.2323 1.31644   7
  -4   7   0 13.5364 2.80240   9
  -4   7   0 10.4970 1.38443   5
  -4   7   0 12.1831 1.90389   2
  -4  -7   0 7.02978 1.38569   1
  -4  -7   0 9.02329 1.16377   2
  -4   7   0 8.17155 1.70974   4
  -4  -7   0 10.1800 1.84952   9
   4  -7   0 6.74969 1.48460   2
  -4  -7   0 8.95625 2.69573   8
   4  -7   0 9.50525 1.33404  10
   4  -7   0 14.4180 2.42481   4
   4   7   0 10.2107 1.87414   5
   4  -7   0 12.9270 1.85570   8
  -4   7   0 9.80215 2.46731   1
   4  -7   0 7.18992 2.22827   9
  -4  -7   0 14.0977 1.91688   9
  -4   7   0 9.47319 1.82159   8
   4   7   0 10.3483 1.17106   4
  -4   7   0 13.1825 2.78923   9
   4   7   0 9.26777 1.48269   1
  -4  -7   0 8.59158 1.08016   2
   4  -7   0 11.5963 1.43333   5
  -4   7   0 11.0239 1.30453  10
  -4  -7   0 16.7622 2.38792   5
  -5   7   0 901.005 26.4911   8
   5  -7   0 927.499 24.5284  10
  -5  -7   0 931.435 23.2944  10
  -5   7   0 932.578 24.9242   5
  -5  -7   0 943.018 24.6896   2
  -5   7   0 926.947 28.5708   9
  -5   7   0 927.491 28.4676   9
   5  -7   0 925.295 26.1149   8
  -5  -7   0 924.132 23.8967   1
   5   7   0 893.536 23.8759   1
  -5   7   0 936.340 25.9556   2
  -5   7   0 954.686 24.5107  10
  -5  -7   0 891.855 26.4197   9
   5  -7   0 890.232 26.6550   4
   5  -7   0 977.919 25.9063   2
  -5  -7   0 912.719 23.5130   7
  -5  -7   0 933.946 26.4213   5
  -5  -7   0 888.473 26.1252   9
  -5  -7   0 947.509 24.4538   2
   5  -7   0 985.727 28.5293   9
  -5   7   0 928.889 24.6107   7
   5  -7   0 911.771 24.8796   5
  -5   7   0 930.586 28.1396   1
  -5  -7   0 920.512 30.3135   8
   6  -7   0 11.5539 1.97120   5
  -6  -7   0 11.9028 2.59723   9
  -6   7   0 13.1659 3.41683   9
  -6  -7   0 7.28653 2.09073   5
  -6   7   0 12.4673 2.56919   8
  -6  -7   0 14.0099 3.92185   8
   6  -7   0 7.81569 2.60845   9
  -6  -7   0 9.00398 1.70054   2
  -6   7   0 8.80293 1.57454  10
  -6  -7   0 10.8146 1.42781   7
  -6   7   0 10.3585 1.73981   7
  -6   7   0 13.4041 2.56026   8
   6  -7   0 12.8814 2.71558   4
   6  -7   0 12.0892 2.36705   8
  -6  -7   0 9.46473 1.24045  10
  -6   7   0 9.07904 2.54501   1
   6  -7   0 7.88067 1.90122   2
  -6   7   0 8.46663 1.73400   5
   6  -7   0 10.0159 1.72312  10
  -6   7   0 11.8226 2.39752   2
  -7   7   0 21.5642 4.53952   9
  -7  -7   0 23.5571 3.77841   9
  -7   7   0 19.5285 3.32519   8
  -7  -7   0 23.6753 2.58258   2
   7  -7   0 17.8920 3.81009   9
  -7   7   0 25.2966 3.04650   5
  -7   7   0 24.0384 2.34581  10
  -7   7   0 25.0682 2.48646   7
  -7  -7   0 17.3371 1.85778  10
  -7  -7   0 17.7974 4.32918   8
  -7  -7   0 19.1255 2.01187   7
  -7   7   0 17.0219 3.37894   1
   7  -7   0 23.8343 2.33454  10
  -7   7   0 19.8082 3.05731   2
   7  -7   0 21.4457 4.83306   4
   7  -7   0 23.2507 3.26622   2
  -7  -7   0 26.9415 3.72811   5
   7  -7   0 18.4884 3.14197   8
  -8   7   0 7.51608 2.09751   5
  -8  -7   0 8.61468 2.18521   2
  -8   7   0 8.23356 2.76051   1
  -8   7   0 10.1862 2.13288   7
  -8  -7   0 5.33835 2.31395   5
  -8  -7   0 7.52941 3.43145   8
  -8  -7   0 6.07936 1.65906   7
  -8  -7   0 9.33976 1.78626  10
  -8   7   0 10.2286 1.96684  10
   8  -7   0 8.30627 1.71786  10
  -8  -7   0 12.1475 3.25340   9
  -9  -7   0 50.4129 5.78330   9
  -9  -7   0 53.7102 4.38984   2
  -9   7   0 54.7453 3.84533  10
  -9  -7   0 55.7868 3.72387  10
  -9  -7   0 52.7356 7.60623   8
   9  -7   0 50.7806 3.39632  10
  -9  -7   0 52.5895 3.80500   7
  -9   7   0 50.8446 3.93013   7
 -10   7   0 0.07455 1.45330  10
 -10  -7   0 -0.0106 1.46615  10
 -10  -7   0 0.67427 1.67205   2
 -10   7   0 1.35560 1.64313   7
 -10  -7   0 0.68356 2.42667   9
 -11  -7   0 10.3428 4.07488   9
 -11  -7   0 13.5037 2.69056  10
 -11   7   0 8.94464 2.36041  10
 -11   7   0 7.17572 2.30642   7
 -11  -7   0 9.92592 2.95124   2
   0   8   0 2332.93 58.9437   4
   0  -8   0 2356.94 59.3082   5
   0  -8   0 2373.27 61.7974   8
   0  -8   0 2346.39 60.4678   9
   0   8   0 2368.27 61.5930   8
   0   8   0 2325.81 58.8939   5
   0   8   0 2432.09 62.5962   1
   0  -8   0 2442.75 60.2896   9
   0  -8   0 2401.12 59.6189   4
   1   8   0 0.44233 1.07199   1
  -1  -8   0 -0.0674 0.64648   9
   1  -8   0 0.60950 0.86483   8
  -1  -8   0 0.39345 0.68781   3
   1   8   0 -0.5490 0.89845   8
   1  -8   0 0.09556 0.52975   2
  -1  -8   0 0.10482 0.52455   4
   1  -8   0 0.35966 0.33135   7
  -1   8   0 0.11654 0.80221   8
   1  -8   0 0.30517 0.49848   2
   1  -8   0 0.48928 0.64607   4
  -1   8   0 0.24895 1.15033   1
  -1  -8   0 -0.3932 0.46306   5
  -1  -8   0 0.14388 1.03101   8
  -1   8   0 0.08124 0.55502   4
   1  -8   0 -0.1447 0.79038   9
  -1  -8   0 0.55032 0.69137   9
   1   8   0 0.70938 0.59395   5
   1  -8   0 0.02847 0.86567   9
   1  -8   0 0.53145 0.35001   7
   2   8   0 1064.03 29.4948   1
  -2  -8   0 1055.24 27.9908   3
  -2   8   0 1033.98 29.2676   9
  -2   8   0 1060.11 28.0443   4
  -2   8   0 1011.15 26.7991   2
  -2  -8   0 1099.64 30.7416   8
   2  -8   0 1051.13 27.8714   2
   2  -8   0 1033.43 26.6894  10
   2  -8   0 1069.88 28.5355   8
  -2  -8   0 1031.27 27.7283   9
   2   8   0 1055.83 30.9013   8
   2  -8   0 1060.48 29.3233   9
   2  -8   0 1069.63 28.4036   4
  -2  -8   0 1005.44 30.9284   8
   2  -8   0 1060.31 27.5536   2
  -2   8   0 1101.70 28.6132   8
  -2  -8   0 1055.59 27.9001   5
  -2  -8   0 1087.53 28.1347   9
   2   8   0 1053.78 27.9314   5
  -2   8   0 1082.97 30.9917   1
  -3  -8   0 -0.0002 1.33285   8
  -3  -8   0 0.43581 0.84751   9
  -3   8   0 0.51456 1.28181   9
   3  -8   0 0.39798 0.88416   4
  -3   8   0 0.42432 0.74282   2
  -3  -8   0 0.38552 0.75828   9
   3  -8   0 -0.3148 1.03145   9
   3   8   0 -0.2971 0.89641   1
  -3  -8   0 0.64146 0.89027   5
  -3   8   0 0.03652 0.39871   7
  -3   8   0 -0.1252 0.42611   7
  -3   8   0 0.41233 0.84468   8
   3  -8   0 -0.0493 0.44850   5
   3  -8   0 0.44453 0.83166   8
   3  -8   0 0.61116 0.80231   2
   3  -8   0 0.43444 0.60255  10
  -3   8   0 -0.3739 1.38936   1
  -3   8   0 0.01124 0.81605   4
   3   8   0 -0.2988 0.83338   5
  -4  -8   0 2529.60 63.2328   2
  -4   8   0 2579.34 65.5924   8
   4   8   0 2545.64 63.2499   4
  -4  -8   0 2539.79 65.5506   5
  -4  -8   0 2638.85 65.1703   1
  -4   8   0 2519.04 64.9711   2
   4  -8   0 2551.15 67.5109   9
   4  -8   0 2545.14 65.0718   8
  -4   8   0 2528.97 63.5764   7
   4  -8   0 2524.13 63.8041  10
  -4   8   0 2531.96 68.1890   1
  -4  -8   0 2490.59 69.7571   8
  -4  -8   0 2564.11 65.3258   9
   4  -8   0 2539.26 66.0380   4
  -4  -8   0 2534.45 65.6178   9
  -4  -8   0 2560.99 63.4120   2
  -4   8   0 2574.49 67.6512   9
   4  -8   0 2567.55 65.0460   2
   4  -8   0 2565.64 63.7251   5
   4   8   0 2480.92 65.5780   5
  -4   8   0 2548.73 63.4330  10
   4   8   0 2565.22 64.9967   1
   5  -8   0 0.54198 0.77102   5
  -5   8   0 -0.1390 0.69580   7
  -5  -8   0 0.39120 0.72424   2
   5  -8   0 -0.5521 1.28002   9
  -5   8   0 -0.0998 1.43936   9
  -5   8   0 -0.1012 0.68642  10
  -5  -8   0 -0.1855 0.88324   9
  -5  -8   0 0.10081 1.06991   5
  -5   8   0 0.80949 1.66902   9
   5  -8   0 0.71576 1.07705   2
   5  -8   0 1.01927 1.02541   8
  -5  -8   0 0.19754 0.65298   2
  -5  -8   0 -0.2604 0.76431   1
  -5  -8   0 0.04156 0.49390   7
   5  -8   0 -0.2668 0.71483  10
  -5  -8   0 0.92483 1.79308   8
  -5  -8   0 -0.2954 1.01119   9
  -5   8   0 0.18956 1.07136   8
   5   8   0 -0.4122 0.64992   1
  -5   8   0 0.11148 1.01026   2
  -5   8   0 0.41205 1.47657   1
   5  -8   0 0.23179 1.06902   4
  -6   8   0 13.1500 3.57017   9
  -6  -8   0 13.4774 1.33840  10
   6  -8   0 13.9531 1.91920  10
   6  -8   0 16.0373 2.45187   8
  -6   8   0 12.6921 2.58606   8
   6  -8   0 12.2838 2.31568   2
   6  -8   0 17.1846 3.87923   9
  -6  -8   0 15.0761 2.05751   2
  -6  -8   0 11.2872 2.50389   9
  -6  -8   0 15.4600 1.49116   7
  -6   8   0 12.0004 3.09966   1
   6  -8   0 10.9012 1.89691   5
  -6  -8   0 13.7200 2.69830   5
  -6   8   0 15.7137 1.95098  10
  -6   8   0 14.2928 3.51779   9
   6  -8   0 8.49726 2.17803   4
  -6   8   0 15.4533 2.64824   8
  -6  -8   0 12.5374 3.65604   8
  -6   8   0 17.4553 2.13362   7
  -6   8   0 16.6519 2.69301   2
  -7  -8   0 0.57225 0.86551  10
  -7   8   0 0.99582 2.35510   2
  -7  -8   0 0.60845 1.50228   9
   7  -8   0 0.89995 1.96094   9
   7  -8   0 0.44051 1.41793   4
  -7   8   0 0.18422 1.05745   7
  -7   8   0 -0.0870 0.96088  10
  -7  -8   0 -0.5969 1.01484   2
  -7  -8   0 -0.7156 1.37253   5
  -7   8   0 -0.3816 1.65486   1
  -7  -8   0 -0.2360 2.01765   8
   7  -8   0 -0.1447 1.34006   8
   7  -8   0 -0.7381 1.30204   2
  -8  -8   0 258.664 13.9537   5
   8  -8   0 240.448 8.53223  10
  -8  -8   0 240.488 8.25199  10
  -8  -8   0 236.373 11.2582   9
  -8  -8   0 252.107 9.57410   2
  -8  -8   0 239.405 14.5452   8
  -8   8   0 248.460 11.7170   1
  -8   8   0 249.514 8.75446  10
  -8   8   0 242.210 8.87179   7
  -9   8   0 0.80239 1.34754  10
   9  -8   0 -0.2958 1.25585  10
  -9  -8   0 0.09389 1.51122   2
  -9  -8   0 -0.7232 1.17765  10
  -9  -8   0 0.53031 2.03451   9
  -9   8   0 0.86891 1.47790   7
 -10  -8   0 37.7584 3.56815  10
 -10   8   0 46.2587 3.95611   7
 -10   8   0 45.4674 3.75429  10
 -10  -8   0 48.5459 4.52334   2
 -10  -8   0 41.6305 5.78668   9
 -11  -8   0 -0.1879 1.93032   2
 -11  -8   0 -0.9243 1.51662  10
 -11  -8   0 0.04603 2.49671   9
 -11   8   0 -0.2472 1.61382  10
 -11   8   0 -0.5316 1.58434   7
   0  -9   0 0.43779 0.44486   5
   0  -9   0 0.37649 0.35061   2
   0  -9   0 0.50455 0.69164   4
   0   9   0 -0.0020 0.96319   8
   0  -9   0 -0.1070 0.75550   9
   0  -9   0 0.06743 0.34601   2
   0   9   0 0.76887 1.45367   1
   0   9   0 -0.1505 0.43677   4
   0  -9   0 0.41628 0.93430   9
   0   9   0 0.04603 0.47237   5
   0  -9   0 0.03088 0.97676   8
  -1  -9   0 2755.83 69.3781   4
   1  -9   0 2820.74 70.0415   4
   1  -9   0 2785.77 68.9713   2
  -1  -9   0 2787.19 70.2981   3
   1  -9   0 2653.33 68.2731   7
  -1   9   0 2814.30 73.3260   1
   1  -9   0 2870.80 70.9979   9
   1  -9   0 2757.15 71.1702   9
  -1   9   0 2812.11 71.2354   8
   1   9   0 2783.79 72.5253   1
   1  -9   0 2785.30 69.2868   2
  -1   9   0 2753.43 69.4252   4
  -1  -9   0 2788.39 72.9237   8
   1   9   0 2690.99 72.4116   8
  -1  -9   0 2824.68 70.1468   9
   1   9   0 2669.44 69.3445   5
   1  -9   0 2809.55 71.3595   8
  -1  -9   0 2784.90 69.3129   5
  -1  -9   0 2768.02 70.1928   9
   2   9   0 31.7863 3.15702   1
   2  -9   0 27.3782 2.06871   2
   2   9   0 37.8517 2.50814   5
  -2   9   0 31.4382 2.63479   8
   2  -9   0 26.9303 2.87087   9
  -2  -9   0 42.4621 3.89753   8
  -2  -9   0 34.1090 2.35482   5
   2  -9   0 35.7517 2.84111   8
  -2  -9   0 42.7407 2.63111   3
  -2   9   0 30.0612 3.69806   1
  -2   9   0 36.6116 2.45734   4
  -2  -9   0 33.0214 3.75841   8
   2   9   0 37.7050 3.85988   8
   2  -9   0 32.5280 2.60117   4
   2  -9   0 33.0819 2.39145   2
  -2  -9   0 41.7671 2.56232   9
   2  -9   0 34.9549 1.65805  10
   3  -9   0 976.956 26.8298   8
  -3  -9   0 989.475 26.9977   9
   3  -9   0 970.485 27.3556   4
  -3  -9   0 1000.57 30.8073   8
  -3  -9   0 995.212 26.8848   5
  -3   9   0 1012.08 30.0722   1
   3  -9   0 949.533 24.7194   5
  -3   9   0 944.114 28.4945   9
  -3  -9   0 959.682 26.5154   9
   3  -9   0 1006.85 26.5053   2
   3   9   0 968.733 26.8852   5
  -3   9   0 1005.28 27.1077   8
   3   9   0 1015.35 27.9782   1
  -3   9   0 1006.18 25.9489   2
   3  -9   0 1020.22 28.7626   9
  -3   9   0 951.070 26.9034   4
   3  -9   0 983.905 25.4308  10
  -4  -9   0 3.23398 1.36523   5
  -4   9   0 2.78110 1.28938   8
   4  -9   0 4.03921 1.25669   8
   4  -9   0 2.26715 1.60774   9
  -4  -9   0 3.54586 1.27774   9
   4   9   0 2.87375 1.27943   1
  -4   9   0 3.95941 0.83029   7
  -4   9   0 3.99357 0.73115  10
  -4  -9   0 2.84810 0.72030   2
   4  -9   0 2.54430 1.31245   4
   4  -9   0 4.09873 1.01756  10
  -4   9   0 3.77423 1.26387   2
  -4  -9   0 3.39441 2.14384   8
   4  -9   0 2.94177 0.80200   5
  -4  -9   0 2.53520 0.66120   2
   4  -9   0 2.17040 1.13052   2
  -4  -9   0 3.66009 1.34787   9
  -4   9   0 4.00741 0.66400   6
  -4   9   0 4.28473 1.28012   2
  -4   9   0 3.33297 1.89842   9
  -4   9   0 1.54860 1.67273   1
  -5  -9   0 202.269 8.38423   5
  -5  -9   0 208.259 11.5351   8
  -5   9   0 205.413 6.64114   7
  -5   9   0 196.994 7.84418   2
   5  -9   0 196.895 8.68424   4
  -5   9   0 197.005 8.20914   8
   5  -9   0 192.737 6.77177   5
   5  -9   0 199.826 7.84819   8
  -5  -9   0 203.293 6.77592   2
  -5  -9   0 208.749 7.40588   1
   5   9   0 203.885 7.31849   1
  -5   9   0 208.154 6.47316  10
   5  -9   0 203.170 6.87314  10
  -5   9   0 199.809 10.0660   1
  -5   9   0 200.119 9.92865   9
  -5  -9   0 199.898 8.20378   9
  -5  -9   0 209.180 8.51281   9
   5  -9   0 208.141 8.00445   2
   5  -9   0 216.992 10.1438   9
  -5  -9   0 207.980 6.55456   2
  -6  -9   0 10.2297 3.48584   8
   6  -9   0 6.66604 1.46191  10
   6  -9   0 14.2741 2.42902   8
  -6  -9   0 9.64028 1.69848   2
  -6   9   0 10.6906 1.70033   7
  -6   9   0 10.7549 1.60675  10
  -6   9   0 6.84723 2.65646   1
   6  -9   0 8.44757 2.45916   4
   6  -9   0 4.86417 2.28530   9
   6  -9   0 9.70449 1.72674   5
  -6  -9   0 8.26907 2.33778   5
  -6  -9   0 8.91530 1.13048  10
   6  -9   0 7.37004 1.99993   2
  -6  -9   0 9.47639 2.34137   9
   7  -9   0 295.119 12.4424   4
  -7  -9   0 305.794 10.3981   2
   7  -9   0 309.652 11.4828   2
   7  -9   0 304.244 14.1125   9
  -7  -9   0 297.101 9.02756  10
  -7   9   0 298.434 9.87252   7
   7  -9   0 313.007 9.98252  10
  -7  -9   0 299.063 15.9246   8
  -7  -9   0 294.465 11.9555   5
  -7   9   0 290.447 13.2895   1
  -7  -9   0 291.528 12.1871   9
  -7   9   0 307.723 9.71663  10
   8  -9   0 0.26996 1.29395  10
   8  -9   0 2.07716 2.11401   2
  -8   9   0 -0.2700 1.09967  10
  -8  -9   0 -0.3277 2.35324   8
  -8   9   0 0.83124 2.13788   1
  -8   9   0 1.83209 1.33200   7
  -8  -9   0 0.53120 1.77418   9
  -8  -9   0 0.87627 1.38000   2
  -8  -9   0 0.56892 1.07483  10
   9  -9   0 66.5091 4.08711  10
  -9   9   0 66.0664 4.13197  10
  -9  -9   0 64.0767 6.25371   9
  -9  -9   0 70.0814 4.95625   2
  -9   9   0 76.3769 4.58754   7
  -9  -9   0 70.3022 4.14262  10
 -10   9   0 0.32893 1.65122  10
 -10  -9   0 0.38445 1.43572  10
 -10  -9   0 -0.0480 1.62303   2
 -10  -9   0 -1.7102 1.88237   9
 -10   9   0 -1.4523 1.29950   7
   0 -10   0 1278.88 32.8307   4
   0 -10   0 1254.14 31.7187   5
   0 -10   0 1243.57 33.8893   9
   0  10   0 1246.09 35.0683   8
   0 -10   0 1278.02 33.6614   9
   0 -10   0 1251.54 31.4053   2
   0  10   0 1239.79 31.8365   5
   0 -10   0 1257.96 31.5210   2
   0  10   0 1278.44 36.3214   1
   0 -10   0 1249.46 35.2986   8
  -1 -10   0 -0.0691 0.60792   5
  -1 -10   0 0.29841 0.81868   9
  -1 -10   0 -0.2650 0.61778   4
   1  10   0 0.15537 1.14884   8
   1 -10   0 0.15447 0.65740   2
  -1 -10   0 0.29220 0.83004   3
   1  10   0 0.39587 1.30062   1
  -1 -10   0 0.53717 0.86146   9
   1  10   0 0.35936 0.65400   5
  -1 -10   0 0.16782 1.20856   8
   1 -10   0 0.53698 0.41782   7
   1 -10   0 0.77914 1.14179   8
   1 -10   0 -0.5830 0.83570   9
  -1  10   0 0.03991 1.25352   1
   1 -10   0 0.29976 0.76061   4
  -1  10   0 -0.4703 0.53754   4
  -1  10   0 -0.2420 0.92064   8
   1 -10   0 -0.0341 0.56966   2
   1 -10   0 -0.5728 0.97408   9
  -2 -10   0 1181.16 30.9408   9
  -2  10   0 1159.46 31.6215   8
  -2 -10   0 1172.81 30.6179   5
   2  10   0 1155.78 30.6830   5
   2 -10   0 1153.80 29.2784  10
  -2 -10   0 1178.43 34.6287   8
  -2 -10   0 1176.35 30.8880   3
   2 -10   0 1192.20 31.8327   8
  -2 -10   0 1165.96 35.8124   8
  -2  10   0 1123.24 30.6233   4
   2 -10   0 1133.31 31.2078   4
   2  10   0 1133.02 35.7717   8
   2 -10   0 1146.11 30.2284   2
   2  10   0 1171.22 33.0947   1
  -2 -10   0 1157.19 31.1059   9
   2 -10   0 1127.94 32.4054   9
   2 -10   0 1175.84 32.4447   9
  -2  10   0 1188.16 34.5758   1
   2 -10   0 1119.05 32.4846   9
   2 -10   0 1162.31 30.7066   2
  -3 -10   0 0.21759 0.82215   9
   3  10   0 -0.0538 1.06907   1
   3  10   0 0.32639 0.89815   5
  -3 -10   0 0.24498 0.82810   3
  -3  10   0 0.43623 1.36685   1
   3 -10   0 0.57198 1.00077   4
   3 -10   0 -0.1485 0.87176   8
   3 -10   0 0.27744 1.26240   9
  -3 -10   0 0.32994 0.96275   9
  -3  10   0 -0.2776 0.86860   8
  -3  10   0 0.39091 0.65979   2
   3 -10   0 0.28654 0.58087  10
  -3 -10   0 0.34734 0.85730   5
   3 -10   0 0.89344 0.84549   2
  -3 -10   0 -0.3437 1.27039   8
  -3  10   0 -0.5699 0.92763   9
  -4  10   0 365.053 9.24400   7
  -4  10   0 323.565 9.14769   7
   4  10   0 345.221 12.0240   1
  -4 -10   0 356.115 9.65214   2
   4 -10   0 346.737 10.2424  10
   4 -10   0 350.456 13.5588   9
  -4  10   0 357.419 11.7267   8
   4 -10   0 344.107 12.2422   4
  -4 -10   0 353.506 11.9599   9
  -4 -10   0 341.878 15.2456   8
  -4  10   0 356.355 14.5263   1
  -4  10   0 350.510 10.9195   2
  -4 -10   0 340.612 11.4946   9
  -4  10   0 345.275 13.5019   9
  -4 -10   0 361.720 11.8696   5
   4 -10   0 339.859 9.67473   5
   4 -10   0 357.088 11.4527   2
   4 -10   0 352.214 11.3514   8
  -4 -10   0 354.796 9.50794   2
  -5 -10   0 -0.7337 1.16930   5
  -5  10   0 -0.0258 0.59142  10
   5 -10   0 -1.1532 1.41170   9
  -5 -10   0 0.90198 1.17815   9
  -5 -10   0 0.68983 0.69977   2
  -5 -10   0 -0.3907 1.89551   8
   5 -10   0 -0.2517 1.03504   2
  -5  10   0 0.41686 1.72466   1
   5 -10   0 -0.1272 0.73518   5
   5  10   0 -0.3774 0.91655   1
  -5  10   0 0.26124 0.66815   7
  -5 -10   0 -0.2594 0.71972   2
  -5  10   0 0.76638 1.13127   8
   5 -10   0 0.39927 1.02823   8
   5 -10   0 -0.5034 1.19246   4
  -5 -10   0 0.52472 1.09504   9
   5 -10   0 -0.2938 0.75846  10
  -6  10   0 805.368 21.9360   7
   6 -10   0 788.177 26.9352   9
  -6 -10   0 813.506 24.6987   9
  -6 -10   0 797.729 29.4516   8
   6 -10   0 848.171 23.7839   8
  -6  10   0 820.177 21.6640  10
  -6 -10   0 804.217 24.5811   5
  -6 -10   0 792.686 22.4291   2
   6 -10   0 818.349 22.3925  10
   6 -10   0 801.584 25.1770   4
  -6  10   0 837.187 27.3011   1
   6 -10   0 823.578 23.9953   2
   7 -10   0 1.59528 2.23611   9
  -7  10   0 0.36748 1.96797   1
  -7 -10   0 0.36382 1.17231   2
  -7 -10   0 -0.5754 0.81332  10
   7 -10   0 0.65939 1.53127   2
  -7 -10   0 0.17612 1.40066   9
  -7 -10   0 -0.9946 2.06078   8
  -7  10   0 0.21140 0.96933  10
  -7  10   0 1.62065 1.09984   7
   7 -10   0 -0.1359 1.10211  10
  -7 -10   0 0.06288 1.46520   5
  -8 -10   0 17.7427 2.79936   2
  -8 -10   0 16.1822 4.84324   8
   8 -10   0 24.2840 3.84100   2
  -8 -10   0 21.7689 2.27565  10
  -8  10   0 21.2958 4.35727   1
  -8 -10   0 23.5502 4.23528   9
  -8  10   0 19.6527 2.54852  10
  -8  10   0 22.5542 2.51549   7
   9 -10   0 -0.5222 1.39947  10
  -9  10   0 -0.4378 1.35852   7
  -9 -10   0 -0.3341 1.90691   9
  -9 -10   0 0.33874 1.27419  10
  -9 -10   0 0.34679 1.54074   2
 -10 -10   0 6.24824 2.03240  10
 -10  10   0 4.20434 1.87490   7
 -10 -10   0 5.92219 3.03752   9
  10 -10   0 5.26207 1.92576  10
 -10 -10   0 5.67802 2.22288   2
   0 -11   0 -0.2154 0.75393   4
   0  11   0 0.51921 1.19604   8
   0  11   0 0.54100 1.51082   1
   0 -11   0 0.38994 0.47674   2
   0 -11   0 0.39519 0.47541   5
   0 -11   0 0.28045 0.46487   2
   0 -11   0 -0.0791 1.16123   8
   0 -11   0 0.38899 0.92857   9
   0 -11   0 1.12420 1.15029   9
   1  11   0 324.595 10.1070   5
  -1 -11   0 340.985 10.0765   5
   1 -11   0 333.200 9.09693   7
   1 -11   0 343.970 10.9032   4
  -1 -11   0 337.303 11.2712   9
   1  11   0 357.081 13.4797   1
   1 -11   0 347.169 9.88147   2
  -1  11   0 339.857 12.1064   8
  -1 -11   0 361.534 11.2964   9
   1 -11   0 342.893 12.0231   9
  -1  11   0 344.314 13.8289   1
   1 -11   0 327.711 10.0962   2
  -1 -11   0 345.850 13.4572   8
   1 -11   0 345.249 12.2874   8
  -1 -11   0 344.791 10.3924   4
   1  11   0 319.953 12.9303   8
   1 -11   0 366.816 11.9859   9
   2 -11   0 2.18888 1.20595   4
  -2 -11   0 1.28260 1.61773   8
  -2 -11   0 0.57188 0.94002   9
   2 -11   0 1.66044 1.18230   8
   2 -11   0 0.70456 0.77973   2
  -2  11   0 2.06399 1.25241   8
   2  11   0 1.31994 1.38155   1
  -2  11   0 1.46889 1.53340   1
   2 -11   0 1.36850 1.34263   9
  -2 -11   0 2.02786 1.05368   3
   2 -11   0 2.29272 1.08747   2
   2 -11   0 1.62321 1.34080   9
  -2 -11   0 1.44682 1.02188   9
   2 -11   0 1.36111 0.94622   2
  -2 -11   0 1.44996 0.89870   5
   2 -11   0 1.30374 0.57434  10
   2  11   0 2.28224 1.03707   5
   2 -11   0 1.68956 1.31182   9
   3 -11   0 2.59543 1.38986   4
  -3 -11   0 3.08240 1.15769   3
  -3 -11   0 4.11788 2.28126   8
   3  11   0 5.44825 1.89590   1
  -3  11   0 3.16591 2.12870   1
  -3  11   0 4.91010 2.04295   9
  -3  11   0 2.24147 1.17509   8
   3 -11   0 2.40760 1.19266   8
  -3 -11   0 2.86691 1.14881   9
  -3 -11   0 2.29253 1.23361   9
   3 -11   0 3.37796 1.15239   2
   3 -11   0 3.20529 1.63543   9
   3  11   0 4.34790 1.39828   5
  -3 -11   0 3.17166 1.33114   5
   3 -11   0 3.27598 0.85779  10
  -4 -11   0 2.87521 1.30242   9
  -4 -11   0 1.74452 0.64717   2
  -4 -11   0 1.67197 1.25538   9
  -4 -11   0 2.02642 2.17724   8
   4  11   0 1.50188 1.32043   1
  -4  11   0 1.45409 1.91554   1
   4 -11   0 1.72197 1.41118   4
   4 -11   0 2.46628 1.27126   2
  -4 -11   0 3.13262 1.45578   5
  -4  11   0 1.16589 1.08223   8
  -4 -11   0 2.27131 0.64140   2
   4 -11   0 0.65154 1.56024   9
   4 -11   0 2.50544 0.65901   5
   4 -11   0 2.54113 1.19512   8
   4 -11   0 1.52884 0.89530  10
  -5 -11   0 213.314 7.01429   2
  -5 -11   0 210.926 8.93752   9
  -5  11   0 223.835 6.32522   7
   5 -11   0 207.312 8.05962   8
   5 -11   0 218.914 10.7388   9
   5  11   0 212.084 8.46244   1
   5 -11   0 220.683 8.55410   2
   5 -11   0 208.019 6.78633   5
   5 -11   0 218.748 7.36865  10
  -5 -11   0 204.083 8.77322   5
  -5 -11   0 217.707 12.4615   8
  -5  11   0 212.091 11.1808   1
   5 -11   0 220.559 9.47963   4
  -6 -11   0 10.9076 1.86267   2
  -6 -11   0 9.05199 3.51665   8
   6 -11   0 7.83034 2.13042   2
   6 -11   0 11.4713 1.84055  10
   6 -11   0 9.99500 3.42700   9
  -6 -11   0 13.7279 2.77814   9
  -6 -11   0 10.9850 2.60645   5
  -6  11   0 13.2341 1.65797   7
  -6  11   0 12.8373 3.63668   1
  -7 -11   0 251.682 11.1347   9
  -7 -11   0 251.644 9.23810   2
  -7  11   0 259.672 8.50562   7
   7 -11   0 262.453 9.05833  10
  -7 -11   0 257.441 11.0980   5
   7 -11   0 270.249 10.6954   2
   7 -11   0 254.420 13.1403   9
  -7 -11   0 253.621 15.0082   8
  -7  11   0 258.745 13.0329   1
   8 -11   0 0.63364 1.37169  10
  -8 -11   0 0.33336 1.64423   9
  -8  11   0 0.81568 1.12993   7
  -8 -11   0 0.18570 1.09014  10
  -8  11   0 0.32598 2.25682   1
  -8 -11   0 -0.5610 1.29499   2
   8 -11   0 0.68126 1.77103   2
  -9 -11   0 9.06176 1.92455  10
  -9  11   0 7.51286 1.85207   7
   9 -11   0 6.21621 1.97195  10
  -9 -11   0 9.05883 2.43640   2
  -9 -11   0 8.47755 3.04187   9
 -10 -11   0 3.50605 2.86240   9
  10 -11   0 -0.6835 1.47371  10
 -10 -11   0 0.45755 1.57638  10
 -10  11   0 -0.0618 1.37643   7
 -10 -11   0 -0.2744 1.73617   2
   0 -12   0 2507.37 62.9058   2
   0 -12   0 2542.14 62.7423   2
   0 -12   0 2529.69 65.3253   9
   0  12   0 2451.00 66.9281   8
   0 -12   0 2547.34 62.8218   5
   0 -12   0 2533.00 64.2931   4
   0 -12   0 2536.60 67.4678   8
   0 -12   0 2549.75 65.7068   9
   0  12   0 2526.70 68.5300   1
   1  12   0 -0.4430 1.37084   8
   1  12   0 0.06957 1.34060   1
   1 -12   0 0.45170 1.03494   9
   1 -12   0 0.35540 0.66787   2
  -1  12   0 0.08172 1.48275   1
   1 -12   0 0.24406 0.85967   4
  -1 -12   0 -0.0682 0.92562   9
  -1 -12   0 -0.1476 0.69222   4
  -1 -12   0 -0.2671 0.89166   9
  -1  12   0 -0.1385 1.05372   8
   1 -12   0 -0.0627 0.68033   2
   1 -12   0 -0.2238 1.09993   8
   1 -12   0 -0.1493 1.09161   9
  -1 -12   0 0.29736 0.61575   5
  -1 -12   0 -0.9081 1.21222   8
   1  12   0 -0.2926 0.68441   5
   2 -12   0 14.1172 2.52409   8
  -2 -12   0 14.7950 3.40927   8
   2 -12   0 14.8668 1.18931  10
  -2 -12   0 16.0091 2.12607   9
   2  12   0 12.8513 2.86544   1
   2  12   0 16.3821 2.10041   5
  -2 -12   0 13.2471 2.16090   9
   2 -12   0 12.3162 2.55503   9
   2 -12   0 15.4582 2.76330   9
   2 -12   0 13.8909 1.69358   2
   2 -12   0 17.0858 2.19541   2
  -2  12   0 12.9469 2.31655   8
  -2 -12   0 16.2152 2.00879   3
   2 -12   0 16.0226 1.95428   2
  -2 -12   0 17.4959 2.10199   5
   2 -12   0 15.1105 2.30545   4
   2 -12   0 12.0816 2.57573   9
  -2  12   0 13.3554 3.13868   1
  -3 -12   0 -0.4419 0.84815   5
   3 -12   0 0.58400 1.12406   4
   3  12   0 -0.7015 1.08999   1
   3 -12   0 -0.5733 1.19169   9
   3 -12   0 -0.2734 0.93192   8
  -3 -12   0 -0.1338 0.81301   3
  -3  12   0 0.53860 0.98791   8
  -3  12   0 -1.0530 1.47172   1
  -3 -12   0 -0.5702 1.52284   8
  -3 -12   0 -0.1083 0.82717   9
   3 -12   0 0.44705 0.61764  10
   3 -12   0 0.37410 0.89035   2
  -3 -12   0 -0.1106 0.95548   9
   3  12   0 0.16275 0.96220   5
  -4  12   0 1226.79 34.2255   8
   4  12   0 1191.69 34.0906   1
   4 -12   0 1156.30 32.4108   2
  -4 -12   0 1177.94 38.1262   8
  -4 -12   0 1184.19 32.8069   9
  -4 -12   0 1222.07 33.3035   9
  -4 -12   0 1170.57 32.8591   5
  -4  12   0 1220.40 37.2658   1
   4 -12   0 1183.48 32.4477   8
   4 -12   0 1157.85 30.9841  10
   4 -12   0 1146.02 35.1945   9
   4 -12   0 1177.10 33.6494   4
  -4 -12   0 1240.47 30.2504   2
  -4 -12   0 1207.70 30.0757   2
  -4 -12   0 1193.13 32.3569   3
  -5 -12   0 0.40410 2.07431   8
   5  12   0 0.07732 1.18843   1
   5 -12   0 0.80035 1.76063   9
   5 -12   0 -0.1900 0.90432  10
   5 -12   0 -0.0673 1.01526   8
  -5 -12   0 -0.2267 0.73563   2
  -5 -12   0 1.28186 1.39383   9
  -5 -12   0 0.06954 1.21186   5
   5 -12   0 -0.1154 1.12859   2
  -5  12   0 0.84980 1.90332   1
  -6 -12   0 11.4957 2.61230   9
  -6  12   0 10.3073 1.28755   7
  -6 -12   0 9.65991 1.74289   2
   6 -12   0 8.02340 1.71608  10
   6 -12   0 10.5657 3.39269   9
  -6  12   0 7.35547 3.18312   1
  -6 -12   0 6.43763 2.20252   5
   6 -12   0 7.30598 2.11577   2
  -6 -12   0 9.47723 3.98073   8
  -7  12   0 -0.3339 2.10356   1
   7 -12   0 0.21239 1.15145  10
  -7 -12   0 -0.7115 1.02707   2
  -7 -12   0 0.23659 1.44789   9
  -7 -12   0 2.24274 2.89989   8
   7 -12   0 1.01430 2.22387   9
  -7 -12   0 -1.9415 1.47330   5
  -7  12   0 0.24805 0.90260   7
   7 -12   0 -0.3116 1.42697   2
   8 -12   0 15.8689 3.30475   2
  -8  12   0 14.6703 4.14426   1
  -8  12   0 18.0845 2.26199   7
  -8 -12   0 15.9840 2.70914   2
   8 -12   0 13.5493 2.40764  10
  -8 -12   0 18.7757 3.85114   9
  -9 -12   0 0.43511 1.27435  10
  -9 -12   0 -0.2464 1.57558   2
  -9 -12   0 0.96772 2.15456   9
  -9  12   0 0.21506 1.29155   7
   9 -12   0 -0.6434 1.41979  10
  10 -12   0 89.2296 5.19939  10
 -10 -12   0 93.9477 7.96639   9
 -10 -12   0 88.6597 6.10354   2
 -10 -12   0 88.4876 5.12761  10
   0 -13   0 0.83813 1.11078   9
   0 -13   0 0.70088 1.14444   9
   0 -13   0 0.24835 1.29395   8
   0 -13   0 0.62999 0.55256   5
   0 -13   0 0.80237 0.64753   2
   0  13   0 0.42100 1.61438   1
   0 -13   0 0.61359 0.59771   2
   0 -13   0 1.22984 0.97177   4
   0  13   0 0.52466 1.31025   8
   1 -13   0 21.9880 1.38512   7
   1 -13   0 20.8121 1.98142   2
  -1  13   0 21.3287 2.92982   8
  -1 -13   0 26.7732 3.80971   8
  -1 -13   0 22.8491 1.86552   5
  -1 -13   0 23.0720 1.21994   2
   1 -13   0 24.3516 2.45935   4
  -1 -13   0 20.9720 2.58663   9
   1 -13   0 22.0823 3.01558   9
   1  13   0 23.1552 3.66834   1
   1 -13   0 25.0870 1.87235   2
  -1 -13   0 20.7172 2.52532   9
   1 -13   0 24.8118 2.94261   9
  -1 -13   0 22.8571 2.16093   4
   1  13   0 22.4907 1.99428   5
   1 -13   0 22.3876 3.13397   8
  -1  13   0 24.4155 3.94060   1
   2 -13   0 22.7492 2.54666   4
   2 -13   0 14.8036 2.80420   9
   2 -13   0 17.3716 1.89791   2
  -2 -13   0 24.8053 2.67612   9
  -2 -13   0 18.7841 1.97426   5
   2  13   0 20.7073 3.37210   1
   2  13   0 23.1192 2.23583   5
  -2  13   0 19.8945 2.70424   8
   2 -13   0 20.9085 1.40717  10
   2 -13   0 25.4933 4.25421   9
   2 -13   0 19.7680 2.79903   8
   2 -13   0 19.6949 2.18503   2
  -2 -13   0 24.1314 2.42853   3
   2 -13   0 21.0247 2.23403   2
  -2 -13   0 15.6261 2.29948   9
  -2  13   0 18.8893 3.87401   1
  -2 -13   0 24.5941 4.40060   8
  -3 -13   0 6.08395 1.68379   9
   3 -13   0 13.6499 1.43878  10
  -3 -13   0 8.06615 1.95037   9
   3 -13   0 7.40430 1.87100   8
  -3  13   0 8.27260 3.04453   1
   3 -13   0 8.69420 1.80998   2
   3  13   0 7.78899 1.84656   5
  -3 -13   0 6.74780 1.58865   3
   3  13   0 6.45611 2.37599   1
  -3 -13   0 7.08507 1.73992   5
   3 -13   0 8.57125 2.05853   4
  -3 -13   0 5.70118 2.65052   8
   3 -13   0 8.14439 2.47171   9
  -3  13   0 6.37429 1.79144   8
  -4 -13   0 59.9160 4.02347   5
  -4 -13   0 68.1950 4.35001   9
   4 -13   0 58.4262 5.41231   4
  -4  13   0 55.8961 5.94979   1
   4 -13   0 39.4619 4.55091   9
   4  13   0 61.7840 4.89695   1
   4 -13   0 45.7860 3.57055   2
  -4 -13   0 53.1073 2.26351   2
   4 -13   0 55.9844 2.98760  10
  -4 -13   0 49.4327 2.33264   2
  -4 -13   0 52.8297 4.07862   9
  -4 -13   0 58.2501 6.38865   8
  -5 -13   0 62.5132 3.14214   2
   5 -13   0 55.0553 5.59317   9
   5 -13   0 59.7877 3.41948  10
   5 -13   0 61.8738 4.34886   2
  -5 -13   0 57.9132 4.48606   9
  -5 -13   0 58.9164 7.01963   8
   5  13   0 61.8897 4.98102   1
  -5  13   0 57.8020 6.27665   1
  -5 -13   0 62.8189 4.52182   5
   6 -13   0 2.08211 2.25178   9
  -6  13   0 3.60370 2.79812   1
   6 -13   0 2.09622 1.64958   2
  -6 -13   0 2.79493 1.27547   2
  -6 -13   0 2.74142 2.74715   8
  -6 -13   0 2.16695 1.75608   5
   6 -13   0 1.99415 1.28772  10
  -6 -13   0 2.50201 1.73168   9
  -7 -13   0 696.129 23.1668   9
   7 -13   0 709.245 22.5040   2
  -7 -13   0 720.851 20.8166   2
  -7  13   0 691.563 26.2703   1
   7 -13   0 734.495 26.4424   9
  -7 -13   0 719.901 29.4061   8
   7 -13   0 715.151 20.5912  10
  -8  13   0 3.51724 2.86301   1
   8 -13   0 0.26108 1.86036   2
   8 -13   0 -0.3528 1.35098  10
  -8 -13   0 1.09927 1.89323   9
  -8 -13   0 -0.2139 1.34496   2
  -9 -13   0 77.3889 5.33107   2
   9 -13   0 76.5268 4.81885  10
  -9 -13   0 77.7542 6.73327   9
 -10 -13   0 3.14572 1.89305  10
  10 -13   0 2.25611 1.81134  10
 -10 -13   0 5.15251 2.68150   2
 -10 -13   0 4.42291 2.89280   9
   0 -14   0 2004.64 51.1177   2
   0  14   0 2053.17 57.5400   1
   0 -14   0 1925.95 53.9764   9
   0 -14   0 2023.50 56.0806   8
   0 -14   0 2054.28 52.6091   4
   0 -14   0 2047.91 50.8808   2
   0 -14   0 2047.89 50.6443   5
   0 -14   0 2008.93 53.8086   9
   1 -14   0 -0.4999 1.14011   9
  -1 -14   0 0.20914 0.48386   2
   1 -14   0 -0.2250 0.35037  10
  -1 -14   0 -0.1399 0.62767   5
   1  14   0 -0.6215 1.41546   1
  -1  14   0 1.02259 1.37286   8
  -1 -14   0 0.01044 0.48079   2
   1 -14   0 -0.1135 0.74900   2
  -1 -14   0 -0.3631 1.48969   8
  -1 -14   0 0.16765 0.85240   4
  -1 -14   0 -0.2143 1.04069   9
   1 -14   0 0.15830 0.70795   2
   1 -14   0 -0.3427 0.54373   7
   1 -14   0 -0.2715 0.95223   4
   1 -14   0 -0.3680 1.28630   9
   1  14   0 -0.2231 0.76315   5
  -1 -14   0 -0.3407 0.98062   9
  -1  14   0 -0.2357 1.72148   1
   1 -14   0 0.10105 1.38259   8
  -2 -14   0 1263.65 35.3542   9
  -2 -14   0 1247.80 39.2397   8
  -2  14   0 1303.08 39.9200   1
  -2 -14   0 1307.19 35.5300   9
  -2  14   0 1294.14 36.1151   8
   2  14   0 1252.49 34.1618   5
  -2 -14   0 1304.44 34.0902   5
   2 -14   0 1324.25 36.5446   8
   2 -14   0 1256.25 33.8728   2
   2 -14   0 1264.08 35.2466   4
   2 -14   0 1315.39 37.0052   9
   2 -14   0 1239.51 32.5279  10
   2  14   0 1287.71 38.3733   1
   3  14   0 -0.4492 1.56998   1
  -3 -14   0 0.14206 1.00096   3
  -3 -14   0 -0.7191 1.09610   9
  -3 -14   0 -0.1445 0.97191   5
   3 -14   0 -0.6017 1.03031   8
   3 -14   0 -0.6569 1.26280   9
   3 -14   0 0.06388 0.96808   2
  -3 -14   0 0.53217 1.82606   8
   3 -14   0 0.55998 0.74422  10
  -3 -14   0 -0.2176 1.15557   9
  -3  14   0 0.09649 1.78413   1
   4 -14   0 19.9832 3.74725   9
   4 -14   0 28.2123 2.99166   2
  -4 -14   0 31.2716 5.81718   8
  -4 -14   0 28.1886 1.82335   2
  -4  14   0 37.8385 5.28985   1
   4 -14   0 34.3905 2.40901  10
  -4 -14   0 28.3025 3.24562   9
  -4 -14   0 37.0873 3.35191   5
   4 -14   0 35.7144 3.81625   8
   4  14   0 31.9388 3.98683   1
   5 -14   0 -0.6984 1.82542   9
  -5 -14   0 0.09799 1.35173   5
  -5 -14   0 -0.1151 1.28969   9
  -5 -14   0 0.61629 2.39306   8
   5 -14   0 0.56187 1.29926   2
  -5  14   0 -0.0175 2.13394   1
  -5 -14   0 0.36889 0.86072   2
   5 -14   0 0.26855 1.02203  10
  -6 -14   0 289.844 11.7298   9
  -6 -14   0 296.201 16.4178   8
   6 -14   0 281.509 9.65356  10
   6 -14   0 270.087 11.0465   2
  -6 -14   0 281.219 9.44660   2
  -6 -14   0 265.611 11.3649   5
  -6  14   0 285.531 14.6972   1
   6 -14   0 273.137 13.8082   9
  -7 -14   0 0.21302 1.26915   2
  -7 -14   0 -0.1214 1.55077   9
  -7  14   0 -0.4151 2.48073   1
   7 -14   0 0.70706 2.36303   9
   7 -14   0 -0.3365 1.23718  10
   7 -14   0 0.11674 1.66542   2
  -8 -14   0 302.999 11.2222   2
   8 -14   0 306.802 12.8821   2
  -8 -14   0 313.260 13.5943   9
  -8  14   0 304.980 15.8367   1
  -9 -14   0 0.49544 2.15287   9
  -9 -14   0 0.51582 1.62466   2
   9 -14   0 1.01514 1.66329  10
   0 -15   0 1.65572 1.43039   2
   0 -15   0 0.46852 0.72520   2
   0 -15   0 0.14257 1.59594   8
   0  15   0 -0.1336 1.90293   1
   0 -15   0 0.88749 1.08437   4
   0 -15   0 1.66603 1.46308   9
   1  15   0 421.870 17.3590   1
  -1  15   0 422.047 15.5998   8
   1 -15   0 426.123 15.9750   8
   1 -15   0 433.152 13.1803   7
  -1 -15   0 441.566 11.7548   2
   1 -15   0 433.844 15.2516   9
  -1 -15   0 431.099 12.5299   5
  -1 -15   0 434.781 14.8708   9
  -1 -15   0 421.918 11.8306   2
   1 -15   0 425.559 11.2819  10
   1 -15   0 427.248 13.9791   4
   1  15   0 419.375 12.7311   5
  -1 -15   0 437.647 17.3580   8
   1 -15   0 434.657 12.6838   2
  -1  15   0 429.087 18.0061   1
  -1 -15   0 423.506 14.5963   9
  -2 -15   0 120.631 3.59096   2
  -2 -15   0 80.8000 5.33599   9
   2  15   0 111.176 7.62597   1
   2  15   0 125.654 5.34202   5
   2 -15   0 85.8224 4.55150   2
  -2 -15   0 118.486 6.21880   9
  -2 -15   0 104.201 7.89753   8
  -2 -15   0 104.372 4.82972   5
   2 -15   0 107.441 6.46692   8
   2 -15   0 111.152 3.85429  10
  -2 -15   0 88.8747 3.37500   2
  -3 -15   0 3.00692 1.49657   5
   3 -15   0 5.64221 1.87975   8
   3  15   0 7.51243 2.71391   1
  -3  15   0 3.85309 2.81465   1
  -3 -15   0 5.13825 0.87534   2
   3 -15   0 6.28726 2.51956   9
  -3 -15   0 3.69733 2.62917   8
   3 -15   0 3.93361 1.48377   2
  -3 -15   0 5.81822 0.85786   2
  -3 -15   0 6.53540 1.94396   9
   3 -15   0 5.28360 1.19912  10
   4 -15   0 10.2920 3.07865   9
  -4 -15   0 14.6803 2.64745   5
   4 -15   0 15.9547 1.99873  10
  -4 -15   0 12.8245 1.44481   2
   4  15   0 16.2338 3.38710   1
   4 -15   0 10.4646 2.22543   2
  -4  15   0 13.8344 3.79908   1
  -4 -15   0 17.3115 4.58286   8
  -4 -15   0 10.0671 2.38550   9
   5 -15   0 457.234 13.9934  10
   5 -15   0 478.133 15.7788   2
  -5  15   0 463.415 20.1491   1
   5 -15   0 458.222 18.6318   9
  -5 -15   0 467.358 16.3078   9
  -5 -15   0 476.606 16.0191   5
  -5 -15   0 480.560 21.4885   8
  -5 -15   0 461.183 13.5312   2
  -6 -15   0 0.12234 2.53455   8
   6 -15   0 -0.0296 1.51203   2
   6 -15   0 0.34426 1.22588  10
  -6  15   0 1.31183 2.50325   1
   6 -15   0 -0.4502 2.23403   9
  -6 -15   0 0.46472 1.49332   5
  -6 -15   0 2.07450 1.72639   9
  -6 -15   0 0.89553 1.14049   2
  -7  15   0 5.45252 3.40304   1
   7 -15   0 6.20551 1.87532  10
  -7 -15   0 4.62365 1.68393   2
   7 -15   0 6.73253 3.27783   9
  -7 -15   0 7.91146 2.73941   9
   7 -15   0 5.82559 2.41316   2
   8 -15   0 3.33061 1.83058  10
   8 -15   0 3.06639 2.33111   2
  -8  15   0 5.42574 3.43870   1
  -8 -15   0 3.73461 2.43005   9
  -8 -15   0 4.72598 1.99313   2
  -9 -15   0 21.3057 4.59759   9
  -9 -15   0 18.2083 3.28242   2
   9 -15   0 18.8492 3.04409  10
   0 -16   0 48.3917 5.15801   8
   0 -16   0 43.9979 4.14753   9
   0  16   0 51.2349 5.86995   1
   0 -16   0 45.5070 2.66114   2
   1  16   0 -0.1050 1.94136   1
  -1 -16   0 0.50179 0.80773   5
  -1 -16   0 -0.7870 1.16569   9
  -1 -16   0 -1.6632 1.48890   8
   1 -16   0 -0.4963 1.24883   9
   1 -16   0 -0.1645 0.47070  10
  -1  16   0 0.88095 2.16016   1
   1 -16   0 -0.0704 0.84248   2
   1 -16   0 -0.8116 1.35051   8
  -1 -16   0 0.07105 0.68758   2
  -2  16   0 685.793 25.7652   1
   2 -16   0 697.414 19.9078   2
   2 -16   0 696.126 22.5390   8
   2 -16   0 680.198 22.7901   9
   2 -16   0 685.696 18.3692  10
  -2 -16   0 704.450 25.4819   8
  -2 -16   0 690.744 18.1664   2
  -2 -16   0 691.838 19.7565   5
   2  16   0 681.430 24.5136   1
  -2 -16   0 697.414 21.6202   9
  -3 -16   0 -0.5253 1.03910   5
  -3 -16   0 -0.3051 2.06800   8
   3 -16   0 0.62779 0.83879  10
   3 -16   0 0.58935 1.19473   2
  -3  16   0 -1.7210 2.03608   1
   3 -16   0 1.07106 1.84384   9
   3  16   0 -0.7200 1.67013   1
  -3 -16   0 0.02428 0.67831   2
  -3 -16   0 0.14500 1.36220   9
   4  16   0 106.162 7.45415   1
   4 -16   0 112.353 4.72250  10
  -4 -16   0 100.046 6.13146   9
   4 -16   0 107.046 5.81507   2
  -4  16   0 106.486 8.98527   1
  -4 -16   0 110.336 9.36086   8
  -4 -16   0 106.741 4.17195   2
   4 -16   0 112.564 7.92040   9
  -4 -16   0 103.201 5.78854   5
   5 -16   0 0.19888 2.00748   9
  -5 -16   0 -0.1947 1.41255   5
  -5 -16   0 0.03235 0.91568   2
   5 -16   0 0.59803 1.47934   2
  -5 -16   0 0.30876 2.42183   8
   5 -16   0 0.54919 1.17159  10
  -5 -16   0 -0.4887 1.41348   9
  -5  16   0 -0.0955 2.59083   1
  -6 -16   0 18.9127 3.44677   5
  -6 -16   0 27.7584 3.77390   9
   6 -16   0 27.1052 5.48564   9
   6 -16   0 28.0070 3.11894  10
   6 -16   0 30.7501 4.18916   2
  -6  16   0 26.9866 5.76921   1
  -6 -16   0 29.9605 2.78078   2
  -7 -16   0 0.23028 1.76406   9
   7 -16   0 0.16408 1.35694  10
  -7 -16   0 0.64187 1.31336   2
   7 -16   0 0.42107 2.43191   9
   7 -16   0 1.58219 1.98648   2
  -7  16   0 1.30260 2.78921   1
  -8 -16   0 93.6891 6.97178   9
   8 -16   0 82.3183 6.46634   2
  -8 -16   0 89.3952 5.45409   2
  -8  16   0 82.6157 8.86756   1
  -9 -16   0 0.86393 1.76676   2
   9 -16   0 -0.1891 1.59390  10
  -9 -16   0 0.79933 2.17980   9
   0 -17   0 2.19460 1.73388   9
   0 -17   0 1.17747 0.93717   2
   0  17   0 0.55230 1.99418   1
   0 -17   0 1.47652 1.99674   8
  -1  17   0 337.895 16.4363   1
   1  17   0 362.547 16.3417   1
  -1 -17   0 356.337 13.3459   9
  -1 -17   0 334.981 15.6528   8
   1 -17   0 363.171 14.7896   8
   1 -17   0 345.479 13.7934   9
   1 -17   0 357.493 11.2139   2
   1 -17   0 344.342 9.65682  10
  -1 -17   0 353.512 10.3482   2
   2 -17   0 15.1598 3.42243   9
   2 -17   0 24.5613 1.79249  10
   2 -17   0 20.0660 2.47115   2
   2 -17   0 24.4839 3.69571   8
   2  17   0 22.1148 4.58382   1
  -2  17   0 21.7358 4.99575   1
  -2 -17   0 23.7036 5.03437   8
  -2 -17   0 15.7652 3.00909   9
  -2 -17   0 17.7490 1.67675   2
  -2 -17   0 21.8371 2.35731   5
  -3 -17   0 351.153 11.8892   5
   3 -17   0 339.279 10.3939  10
   3 -17   0 337.257 14.5707   9
  -3  17   0 342.348 16.9816   1
  -3 -17   0 345.458 13.1204   9
   3  17   0 341.370 15.3475   1
   3 -17   0 343.753 11.9090   2
  -3 -17   0 350.869 10.0446   2
  -3 -17   0 352.428 17.1032   8
   4 -17   0 3.30789 2.44010   9
   4 -17   0 5.47225 1.97575   2
   4  17   0 5.39352 2.67799   1
  -4  17   0 5.47551 3.32812   1
  -4 -17   0 4.41601 1.19415   2
  -4 -17   0 5.45855 1.90193   5
  -4 -17   0 3.60940 1.91685   9
  -4 -17   0 5.22595 3.09264   8
   4 -17   0 7.10406 1.57458  10
   5 -17   0 260.391 9.37586  10
  -5  17   0 270.388 15.2659   1
  -5 -17   0 279.369 9.13118   2
   5 -17   0 275.775 14.0073   9
  -5 -17   0 279.560 11.7291   9
   5 -17   0 288.333 11.2471   2
  -5 -17   0 275.678 11.2031   5
  -5 -17   0 285.148 16.4845   8
  -6 -17   0 30.2000 4.36157   5
   6 -17   0 17.2188 3.33975   2
  -6 -17   0 19.6684 3.62411   9
  -6 -17   0 20.6148 2.55923   2
   6 -17   0 20.6476 2.83114  10
   6 -17   0 11.3155 4.05587   9
  -6  17   0 33.0494 6.38816   1
  -7 -17   0 103.583 5.55376   2
   7 -17   0 107.947 9.42375   9
  -7 -17   0 101.606 7.10230   9
  -7  17   0 97.0983 9.47996   1
   7 -17   0 113.195 5.76929  10
   7 -17   0 104.183 6.97902   2
   8 -17   0 0.94873 1.68180  10
   8 -17   0 0.11210 1.99632   2
  -8  17   0 1.17093 2.97082   1
  -8 -17   0 -0.7254 1.40079   2
  -8 -17   0 1.02799 2.06281   9
   0  18   0 468.436 20.1114   1
   0 -18   0 443.924 16.5211   9
   0 -18   0 455.233 18.5328   8
   0 -18   0 462.726 13.6304   2
  -1 -18   0 0.42515 0.88600   2
  -1  18   0 0.00698 2.26928   1
   1 -18   0 0.70561 1.92800   8
   1 -18   0 -0.5813 0.96957   2
  -1 -18   0 0.91287 2.13791   8
   1  18   0 -0.3155 2.16917   1
   1 -18   0 0.13599 1.66308   9
  -1 -18   0 1.17223 1.60556   9
   2 -18   0 537.429 14.7347  10
  -2 -18   0 539.873 14.8907   2
   2 -18   0 520.126 16.2780   2
   2  18   0 549.440 21.5239   1
   2 -18   0 504.702 19.2026   9
  -2 -18   0 527.775 21.9226   8
  -2 -18   0 518.898 18.1671   9
  -2  18   0 549.592 22.8107   1
  -3 -18   0 -0.7707 0.77449   2
  -3 -18   0 -1.0530 2.22153   8
   3 -18   0 -0.1857 1.24284   2
   3 -18   0 -0.5237 0.84849  10
  -3 -18   0 0.10072 1.54881   9
  -3  18   0 0.25025 2.55952   1
   3  18   0 -0.4108 1.96123   1
   3 -18   0 -0.1148 1.97186   9
  -4 -18   0 140.503 7.03099   5
  -4 -18   0 138.319 5.35783   2
   4  18   0 150.404 9.53176   1
  -4  18   0 134.033 10.6545   1
   4 -18   0 140.715 7.07267   2
   4 -18   0 124.657 8.92332   9
   4 -18   0 142.216 5.74746  10
  -4 -18   0 136.538 7.62562   9
  -4 -18   0 137.953 10.9431   8
  -5 -18   0 0.19853 1.68199   9
   5 -18   0 0.39771 1.25713  10
  -5  18   0 0.88315 3.08335   1
   5 -18   0 1.03814 2.45564   9
  -5 -18   0 1.02395 1.66334   5
  -5 -18   0 1.01447 1.11739   2
   5 -18   0 0.14162 1.58941   2
  -6 -18   0 44.6069 3.48248   2
   6 -18   0 40.9599 6.64061   9
  -6 -18   0 49.4462 4.96225   9
  -6  18   0 46.0219 7.05196   1
   6 -18   0 43.8631 3.65010  10
   6 -18   0 38.7035 4.47978   2
   7 -18   0 0.27721 1.90725   2
   7 -18   0 -0.0714 1.52842  10
  -7 -18   0 0.54655 1.37645   2
  -7  18   0 0.91156 2.99415   1
  -7 -18   0 -0.5370 1.70994   9
   7 -18   0 0.01083 2.62774   9
  -8  18   0 6.10818 3.92371   1
  -8 -18   0 5.09947 2.63371   9
   8 -18   0 6.76809 2.92979   2
   8 -18   0 6.18932 2.23138  10
  -8 -18   0 4.66827 2.01724   2
   0 -19   0 0.77314 1.08881   2
   0 -19   0 2.77928 1.90718   9
   0  19   0 1.47765 2.69304   1
   0 -19   0 3.50067 2.58239   8
   1  19   0 36.0443 6.21983   1
  -1 -19   0 31.9034 4.05605   9
  -1 -19   0 33.7869 5.37665   8
   1 -19   0 33.3924 2.95098   2
  -1  19   0 26.6540 5.57633   1
   1 -19   0 31.8976 4.37345   9
  -1 -19   0 34.6271 2.61381   2
   2 -19   0 3.38381 2.30541   9
   2  19   0 2.68216 2.76635   1
  -2  19   0 3.15768 3.21216   1
   2 -19   0 6.42039 1.29324  10
  -2 -19   0 5.15824 3.22596   8
  -2 -19   0 4.14599 2.20126   9
   2 -19   0 4.57133 1.72546   2
  -2 -19   0 3.79809 1.24110   2
  -3 -19   0 189.544 6.66610   2
   3 -19   0 186.576 8.19792   2
  -3 -19   0 186.845 12.5994   8
   3  19   0 186.751 11.4084   1
  -3  19   0 190.622 12.8306   1
   3 -19   0 192.761 6.79468  10
  -3 -19   0 187.728 9.34496   9
   3 -19   0 194.415 10.8230   9
  -4  19   0 2.70436 3.20533   1
  -4 -19   0 1.47357 1.14946   2
   4  19   0 2.84824 2.71402   1
   4 -19   0 3.52121 1.41227  10
  -4 -19   0 1.51513 1.96104   9
   4 -19   0 0.93644 1.56709   2
  -4 -19   0 3.34030 3.21751   8
   4 -19   0 1.40635 2.43899   9
   5 -19   0 362.957 13.7145   2
  -5 -19   0 361.806 11.5304   2
  -5  19   0 340.221 18.3306   1
   5 -19   0 363.799 17.0557   9
  -5 -19   0 358.617 14.3144   9
   5 -19   0 350.403 11.7564  10
   6 -19   0 0.29988 1.42988  10
   6 -19   0 -0.5217 2.41681   9
  -6  19   0 2.05966 3.17208   1
  -6 -19   0 1.33462 1.91463   9
   6 -19   0 -0.2505 1.71524   2
  -6 -19   0 0.22967 1.29795   2
   7 -19   0 95.0273 7.06050   2
  -7 -19   0 99.6467 7.22842   9
   7 -19   0 107.795 9.81910   9
  -7 -19   0 102.831 5.71885   2
   7 -19   0 103.715 5.82617  10
  -7  19   0 98.8011 10.0182   1
   0 -20   0 977.344 26.6497   2
   0  20   0 984.168 34.6715   1
   0 -20   0 948.260 37.8933   8
   0 -20   0 936.040 30.2454   9
  -1 -20   0 -1.3738 1.51737   9
  -1 -20   0 -0.2010 0.97948   2
  -1  20   0 -0.6975 2.59401   1
   1 -20   0 0.25932 1.92647   9
  -1 -20   0 -1.4235 2.10658   8
   1  20   0 -0.9708 2.36533   1
   1 -20   0 0.76227 1.21709   2
   2 -20   0 46.2631 3.80833   2
   2 -20   0 43.5318 5.32513   9
  -2 -20   0 47.9156 6.74603   8
  -2  20   0 53.8025 7.26767   1
   2  20   0 51.1907 6.55690   1
   2 -20   0 47.9480 2.80572  10
  -2 -20   0 44.2166 4.77219   9
  -2 -20   0 48.0631 3.13118   2
  -3 -20   0 -0.1677 1.02078   2
  -3 -20   0 -0.0554 1.74801   9
   3  20   0 1.46490 2.57608   1
  -3 -20   0 0.20462 2.56684   8
   3 -20   0 1.71269 2.29063   9
   3 -20   0 0.40087 1.38944   2
  -3  20   0 -1.0088 2.70314   1
   3 -20   0 -0.4394 0.96374  10
  -4 -20   0 198.683 9.99002   9
  -4  20   0 209.715 14.0794   1
   4 -20   0 195.446 7.58040  10
  -4 -20   0 204.922 7.46171   2
   4 -20   0 208.658 9.34236   2
   4 -20   0 200.650 11.9213   9
   5 -20   0 2.02730 1.85366   2
  -5 -20   0 0.59139 1.26196   2
   5 -20   0 -1.0537 2.12458   9
   5 -20   0 0.63440 1.37790  10
  -5  20   0 -0.0967 3.02440   1
  -5 -20   0 0.05055 1.74418   9
   6 -20   0 47.7143 6.92656   9
   6 -20   0 50.8054 5.09663   2
  -6 -20   0 58.2264 5.50983   9
  -6 -20   0 48.7155 3.83048   2
   6 -20   0 49.4300 3.96232  10
  -6  20   0 49.5681 7.71332   1
  -7 -20   0 0.20023 1.98344   9
   7 -20   0 0.01225 2.74247   9
  -7  20   0 -0.2674 3.09340   1
   7 -20   0 -0.2359 1.67181  10
  -7 -20   0 0.59374 1.58263   2
   7 -20   0 1.83633 2.16076   2
   0  21   0 1.65034 2.70952   1
   0 -21   0 1.60215 1.32242   2
   0 -21   0 3.03386 2.22553   9
  -1 -21   0 51.2986 5.31389   9
  -1 -21   0 60.3402 3.78409   2
   1 -21   0 53.4355 5.69231   9
   1 -21   0 63.0850 4.25705   2
  -1  21   0 51.8972 7.42131   1
   1  21   0 55.6033 7.26531   1
  -1 -21   0 57.5288 7.24580   8
   2 -21   0 0.07899 1.34301   2
  -2 -21   0 1.95904 2.77384   8
  -2 -21   0 -1.0645 1.64176   9
   2 -21   0 -0.1793 0.92702  10
  -2  21   0 0.63653 2.67116   1
  -2 -21   0 -0.7151 1.04045   2
   2  21   0 -0.3999 2.28484   1
   2 -21   0 0.37543 2.03288   9
   3 -21   0 152.395 6.09359  10
  -3 -21   0 147.334 6.17651   2
  -3 -21   0 162.510 8.95523   9
  -3  21   0 152.986 12.1343   1
   3 -21   0 153.099 10.0622   9
   3  21   0 154.902 11.0119   1
  -3 -21   0 153.780 12.0057   8
   3 -21   0 147.712 7.52452   2
  -4 -21   0 2.28276 2.00235   9
   4 -21   0 -0.2134 1.58970   2
   4 -21   0 1.27911 1.35825  10
   4 -21   0 2.41876 2.66685   9
  -4 -21   0 0.58435 1.23151   2
  -4  21   0 -0.1055 3.01589   1
  -5  21   0 28.6911 6.82189   1
  -5 -21   0 39.7754 3.30117   2
   5 -21   0 42.5349 3.58895  10
   5 -21   0 40.5671 4.51840   2
  -5 -21   0 36.8967 4.68854   9
   5 -21   0 42.2177 6.86107   9
  -6  21   0 -0.1735 3.14630   1
   6 -21   0 3.43708 1.81124  10
  -6 -21   0 1.32715 2.12144   9
   6 -21   0 1.75484 3.09108   9
  -6 -21   0 0.24959 1.43475   2
   6 -21   0 1.21864 2.14351   2
   0 -22   0 54.6216 4.00305   2
   0  22   0 58.5861 7.82693   1
   0 -22   0 56.9844 5.85801   9
   1  22   0 0.81765 2.87230   1
   1 -22   0 0.19236 1.40122   2
  -1  22   0 -0.5188 2.86552   1
   1 -22   0 -0.4286 1.96434   9
  -1 -22   0 -0.3945 1.16977   2
  -1 -22   0 -0.2622 1.84733   9
  -2  22   0 166.757 12.7322   1
  -2 -22   0 159.328 6.65755   2
  -2 -22   0 155.515 9.20304   9
  -2 -22   0 147.634 11.5494   8
   2 -22   0 162.325 6.31968  10
   2 -22   0 162.262 7.73516   2
   2  22   0 162.176 11.8169   1
   2 -22   0 160.631 10.3717   9
  -3 -22   0 0.44393 1.22251   2
   3 -22   0 -0.4460 2.13782   9
   3 -22   0 0.67807 1.18652  10
  -3 -22   0 -0.5079 1.77875   9
  -3  22   0 -0.2185 2.78186   1
   3 -22   0 -0.0412 1.58001   2
   3  22   0 0.42491 2.76138   1
   4 -22   0 29.7832 5.95901   9
   4 -22   0 27.6072 4.21910   2
  -4 -22   0 21.5710 2.66847   2
   4 -22   0 24.8830 2.96708  10
  -4 -22   0 33.0219 5.10712   9
  -4  22   0 24.8200 6.46430   1
   5 -22   0 -0.5180 1.78426   2
  -5 -22   0 -0.6512 1.25034   2
  -5  22   0 0.50815 3.36382   1
   5 -22   0 1.52426 2.83669   9
  -5 -22   0 -0.0619 1.92097   9
   5 -22   0 0.35007 1.41075  10
   0 -23   0 2.68554 1.61336   2
   0 -23   0 5.26140 2.69226   9
   0  23   0 0.40086 3.04381   1
  -1 -23   0 1.24660 1.39939   2
   1  23   0 1.20813 3.20382   1
   1 -23   0 1.35851 2.31613   9
  -1  23   0 1.22430 2.92578   1
  -1 -23   0 0.61019 2.04006   9
   1 -23   0 0.86193 1.60875   2
  -2 -23   0 0.69880 1.40383   2
   2 -23   0 0.64710 1.59865   2
  -2 -23   0 0.44062 2.02993   9
   2  23   0 -0.4481 2.72605   1
  -2  23   0 0.52051 3.09057   1
   2 -23   0 0.55527 2.32483   9
  -3 -23   0 271.308 9.85782   2
   3 -23   0 272.604 11.4134   2
   3 -23   0 267.557 14.4393   9
  -3  23   0 278.246 17.3866   1
   3 -23   0 269.928 9.45193  10
   3  23   0 255.854 15.3445   1
  -3 -23   0 272.320 12.8943   9
   4 -23   0 5.75693 2.50778   2
  -4 -23   0 3.72063 1.71047   2
   4 -23   0 5.54858 1.88006  10
   4 -23   0 4.36910 3.03778   9
  -4  23   0 4.84621 4.86947   1
  -4 -23   0 6.95437 2.95283   9
   0  24   0 8.13600 4.36413   1
   0 -24   0 7.64577 3.15130   9
   0 -24   0 7.43913 2.16037   2
   1  24   0 -0.3168 3.05358   1
  -1 -24   0 0.75650 2.27959   9
  -1  24   0 -1.2705 3.00696   1
  -1 -24   0 0.83101 1.46765   2
   1 -24   0 -1.0628 2.13566   9
   1 -24   0 0.18907 1.55935   2
   2 -24   0 19.6807 3.50748   2
  -2  24   0 16.8175 5.84793   1
  -2 -24   0 16.7524 4.08943   9
   2  24   0 18.6165 5.68809   1
   2 -24   0 17.3931 4.59253   9
  -2 -24   0 17.3773 2.88303   2
  -3 -24   0 1.01376 2.20540   9
  -3 -24   0 -0.5452 1.37692   2
   3 -24   0 -0.2778 2.34443   9
   3 -24   0 -0.1079 1.27215  10
   3 -24   0 -0.5452 1.63524   2
   0 -25   0 4.67269 2.93160   9
   0  25   0 0.60566 3.23435   1
   0 -25   0 1.68216 1.76558   2
   1  25   0 66.8282 8.97651   1
  -1 -25   0 57.9646 6.46185   9
   1 -25   0 62.8311 7.04388   9
   1 -25   0 66.5259 5.17254   2
  -1 -25   0 65.9594 4.73629   2
   0   0  -1 1.11697 0.27643   1
   0   0   1 1.50781 0.30756   1
  -1   0  -1 0.24491 0.31135   9
   1   0  -1 -0.0124 0.30929   8
  -1   0  -1 0.27158 0.28743   5
  -1   0   1 0.23312 0.37461   8
   1   0   1 -0.1365 0.36176   8
  -1   0  -1 0.11264 0.18737   2
  -1   0  -1 0.02017 0.13204  10
   1   0  -1 0.04744 0.15918  10
  -1   0  -1 0.11605 0.31913   9
  -1   0   1 0.16610 0.23405   2
   1   0  -1 0.43220 0.36019   9
   1   0  -1 0.09114 0.22129   2
   1   0   1 0.11337 0.12395   7
   1   0   1 0.02366 0.29717   5
  -1   0   1 0.03473 0.16887  10
  -1   0   1 0.15060 0.27328   5
   1   0   1 0.12909 0.17429   2
   1   0   1 -0.0175 0.13121   9
  -1   0   1 0.00186 0.26868   1
  -1   0   1 -0.0301 0.25542   1
  -1   0  -1 -0.0240 0.24022   4
   1   0  -1 -0.1781 0.17508   7
  -1   0  -1 -0.1378 0.11148  10
  -1   0   1 0.16135 0.21984   7
   1   0  -1 0.24705 0.27864   5
   1   0  -1 -0.0470 0.23502   6
  -1   0   1 0.05745 0.21561   2
   1   0   1 -0.0267 0.09185   2
  -1   0  -1 0.03247 0.16884   7
  -1   0   1 0.32135 0.36088   9
   1   0  -1 0.37866 0.22961   2
   1   0  -1 0.18376 0.28070   1
  -1   0  -1 -0.0686 0.37538   8
   1   0   1 0.00690 0.26724   4
  -1   0  -1 0.10876 0.20878   2
   1   0   1 0.16509 0.26039   1
  -1   0  -1 0.25623 0.28212   1
   1   0  -1 0.29090 0.26679   1
  -2   0  -1 2.74399 0.68491   4
   2   0  -1 3.04135 0.61499   1
   2   0  -1 2.30559 0.62428   5
  -2   0   1 3.01113 0.86366   9
   2   0  -1 2.82998 0.62267   2
   2   0   1 2.67746 0.51530   2
   2   0  -1 2.58915 0.48813  10
   2   0   1 3.38788 0.47584   7
  -2   0   1 3.16095 0.72611   5
   2   0   1 4.36927 0.96542   9
  -2   0  -1 3.71692 0.62265   2
   2   0   1 2.46786 0.93924   8
  -2   0   1 2.49923 0.59413   2
  -2   0   1 3.75352 1.00062   8
  -2   0   1 2.71965 0.83430   8
   2   0   1 3.79577 0.61947   2
  -2   0   1 4.02620 0.58277  10
   2   0   1 3.11618 0.39046  10
   2   0  -1 2.68273 0.57287   2
   2   0   1 3.12838 0.76865   5
  -2   0  -1 2.97661 0.56711   7
   2   0  -1 2.71419 0.64705   1
  -2   0   1 3.09508 0.59154   7
  -2   0   1 2.38012 0.59975   1
   2   0  -1 2.91198 0.91067   8
  -2   0  -1 2.66255 0.93918   8
   2   0  -1 2.19835 0.77381   9
   2   0   1 3.25198 0.66403   1
  -2   0  -1 3.36567 0.63116   2
   2   0   1 2.53040 0.66232   4
  -2   0   1 3.06869 0.65521   2
  -2   0  -1 3.44675 0.63132   1
  -2   0  -1 2.50403 0.69385   5
  -2   0  -1 3.67928 0.89679   9
   3   0  -1 0.81870 0.88443   8
   3   0   1 0.49050 0.50987   1
   3   0  -1 0.52170 0.43288  10
   3   0   1 0.21202 0.56708   4
  -3   0  -1 0.42563 0.61783   4
  -3   0   1 0.90484 0.52183   1
   3   0   1 1.12125 0.79314   5
  -3   0  -1 0.49510 0.41053  10
   3   0   1 0.70986 0.33740  10
  -3   0  -1 0.29442 0.50383   2
  -3   0  -1 0.35156 0.47877   2
   3   0  -1 0.33993 0.47097   1
  -3   0   1 0.91338 0.69615   5
   3   0  -1 -0.1991 0.73498   9
  -3   0  -1 0.50853 0.53279   7
  -3   0   1 0.37986 0.77259   8
  -3   0   1 0.25379 0.45069  10
   3   0   1 0.64970 0.52474   2
  -3   0   1 0.16281 0.51930   2
   3   0  -1 0.52080 0.51425   1
  -3   0  -1 0.69151 0.94073   8
  -3   0  -1 0.18786 0.42491   1
   3   0  -1 1.13021 0.74064   5
  -3   0  -1 0.63074 0.90255   8
  -3   0   1 0.69824 0.84595   9
   3   0   1 0.70717 0.91774   8
   3   0   1 0.17357 0.71995   9
  -3   0  -1 0.91145 0.87937   9
   3   0  -1 0.55797 0.82142   8
  -3   0   1 0.24636 0.47782   7
   3   0  -1 0.26931 0.46799   7
   3   0  -1 0.26733 0.53703   2
  -3   0   1 1.06320 0.92800   8
   3   0  -1 0.51790 0.64522   4
  -3   0  -1 0.68106 0.68101   5
  -3   0   1 0.46398 0.55845   2
   3   0   1 0.77838 0.41617   7
  -4   0  -1 111.835 6.06389   8
   4   0  -1 111.389 4.21746   1
  -4   0   1 113.140 4.46702   2
  -4   0  -1 117.524 4.06446   7
   4   0   1 122.406 4.25386   2
   4   0   1 112.152 5.85575   8
   4   0   1 117.575 4.11801   1
  -4   0   1 118.385 4.89847   5
   4   0  -1 115.131 4.34223   2
   4   0  -1 112.563 5.36225   9
   4   0  -1 103.765 4.77667   4
  -4   0  -1 115.214 4.82679   5
   4   0   1 119.705 3.64368   7
   4   0  -1 107.893 4.74063   5
  -4   0  -1 116.324 4.95626   4
  -4   0   1 106.762 5.43805   9
  -4   0   1 114.693 4.08995   7
  -4   0  -1 113.578 5.52538   9
  -4   0   1 112.242 5.89920   8
   4   0   1 115.941 4.88998   5
  -4   0   1 107.844 5.57873   8
  -4   0  -1 112.640 5.97193   8
  -4   0  -1 113.853 3.88843  10
  -4   0  -1 125.834 4.72956   2
  -4   0  -1 109.219 4.34791   2
   4   0   1 112.145 4.79466   4
   4   0  -1 117.009 4.14288   1
   4   0   1 118.325 5.43717   9
   4   0  -1 108.576 5.68344   8
   4   0   1 117.267 3.37944  10
  -4   0   1 109.979 4.11628   1
  -4   0   1 113.915 3.97385  10
  -4   0  -1 117.081 4.04750   1
   5   0   1 16.9737 2.40682   5
  -5   0  -1 14.8177 2.09447   5
   5   0  -1 13.8112 1.21611  10
  -5   0   1 15.7160 2.26893   5
   5   0   1 12.1331 1.08509   7
  -5   0   1 17.2146 2.77368   8
   5   0  -1 16.1059 2.25468   4
  -5   0   1 21.4483 2.89505   9
   5   0   1 13.9807 0.89798  10
  -5   0   1 15.5732 1.93166   2
   5   0  -1 10.6925 1.40460   1
  -5   0  -1 13.9487 1.60038   7
   5   0   1 13.5461 2.51818   9
   5   0   1 10.9891 1.51674   2
   5   0   1 13.7741 1.51640   1
  -5   0   1 15.3558 1.57388  10
  -5   0  -1 15.3527 1.47992  10
  -5   0   1 13.2970 1.57066   7
  -5   0  -1 20.2224 3.01935   8
  -5   0   1 19.7352 2.85351   8
   5   0  -1 15.1194 2.23310   5
   5   0  -1 11.1448 1.30254   7
   5   0  -1 15.0605 1.87896   2
   5   0  -1 10.5851 2.17909   9
   5   0   1 20.3602 2.89842   8
  -5   0  -1 19.0747 1.95992   2
  -5   0  -1 20.8301 2.82262   9
   5   0   1 15.0768 2.10334   4
  -5   0  -1 17.1217 1.48416   1
  -5   0  -1 17.5377 2.16015   4
  -5   0  -1 20.3229 3.11484   8
   6   0  -1 161.910 7.26496   4
   6   0   1 162.467 5.01936   7
  -6   0   1 174.134 8.50500   9
   6   0  -1 185.889 8.41591   9
  -6   0  -1 179.412 9.38404   8
   6   0  -1 166.753 5.92594   1
  -6   0  -1 180.725 6.06467  10
  -6   0  -1 182.512 6.25123   7
  -6   0  -1 169.715 5.64375   1
  -6   0  -1 181.118 7.39284   5
  -6   0  -1 171.382 8.52464   9
   6   0  -1 177.789 6.48447   2
   6   0   1 169.505 5.77680   1
   6   0  -1 170.498 5.23002  10
   6   0   1 175.510 8.25913   9
  -6   0   1 176.764 6.26414   7
   6   0   1 177.693 9.02004   8
   6   0  -1 163.730 5.56863   7
  -6   0   1 174.031 6.06980  10
   6   0  -1 173.162 5.91314   1
  -6   0  -1 181.037 6.90876   2
   6   0   1 166.477 7.32022   4
   6   0   1 190.352 6.38732   2
  -6   0   1 176.066 6.87645   2
  -6   0   1 161.294 8.82871   8
  -6   0   1 181.174 7.45933   5
  -7   0  -1 0.36963 1.34483   5
  -7   0   1 0.36380 0.88491  10
  -7   0   1 0.75239 1.00635   7
  -7   0  -1 -0.7468 1.48032   8
  -7   0  -1 -0.1529 0.93014   7
  -7   0  -1 -0.2863 0.81778  10
  -7   0   1 0.44361 1.11046   2
   7   0   1 0.73594 1.61492   8
  -7   0   1 0.97721 1.84114   8
  -7   0  -1 1.43682 1.21522   2
  -7   0   1 0.63195 1.66983   9
  -7   0  -1 0.64878 1.63383   9
  -7   0   1 -0.0215 1.26584   5
  -8   0   1 2.22451 1.55303   2
  -8   0   1 2.61545 1.42541   7
  -8   0  -1 2.12722 2.47325   8
  -8   0  -1 0.88065 1.34530   2
  -8   0   1 1.64592 1.82091   5
   8   0   1 2.06503 2.30675   8
  -8   0   1 1.50922 1.25202  10
  -8   0   1 1.76548 2.24015   9
  -8   0  -1 1.69789 1.33480   7
  -8   0  -1 1.62436 2.07097   9
  -8   0  -1 0.95506 1.70500   5
  -8   0   1 2.26434 2.25191   8
  -8   0  -1 1.75898 1.18204  10
  -9   0  -1 0.41810 1.37150   7
  -9   0   1 0.74539 1.63677   2
  -9   0   1 -0.0810 2.36417   8
  -9   0   1 -2.8751 1.54897   5
  -9   0   1 0.55198 1.32395  10
  -9   0  -1 0.27823 2.45275   8
  -9   0  -1 -0.6338 1.13355  10
  -9   0  -1 -0.4465 2.03612   9
  -9   0  -1 1.05436 1.60710   2
  -9   0   1 -0.9112 2.04374   9
  -9   0   1 0.21888 1.42104   7
  -9   0  -1 -0.9052 1.71191   5
 -10   0  -1 0.73936 2.80711   9
 -10   0  -1 0.39474 1.58633   7
 -10   0  -1 -0.1595 1.72814   2
 -10   0   1 1.44968 1.92935   2
 -10   0   1 1.40143 1.67178   7
 -10   0   1 1.62855 2.81828   8
 -10   0   1 -0.7778 2.44084   9
 -10   0   1 0.48037 1.46361  10
 -10   0  -1 1.19637 1.53999  10
 -10   0  -1 0.18884 2.57259   8
 -11   0  -1 0.21677 1.74572   7
 -11   0   1 -0.1818 1.96785   2
 -11   0   1 -0.1319 1.55798  10
 -11   0   1 -0.5131 2.61902   9
 -11   0  -1 0.09032 1.90686   2
 -11   0  -1 1.63151 2.92794   9
 -11   0   1 1.68573 1.78349   7
 -11   0  -1 -0.9024 1.42453  10
   0  -1   1 -0.0401 0.26408   8
   0   1  -1 0.15512 0.16668   6
   0   1   1 -0.0036 0.19318   8
   0  -1  -1 0.02329 0.21071   1
   0   1  -1 0.01864 0.11309  10
   0   1  -1 0.07325 0.22713   9
   0   1  -1 0.05886 0.14197   2
   0   1  -1 0.06903 0.16373   2
   0  -1   1 -0.0007 0.10463  10
   0   1  -1 -0.0487 0.26951   8
   0   1  -1 -0.0048 0.09448  10
   0   1  -1 0.00314 0.12623   7
   0  -1   1 0.12564 0.24729   9
   0  -1   1 0.12836 0.22250   9
   0  -1   1 -0.0741 0.13789   2
   0  -1  -1 -0.0199 0.21517   3
   0  -1   1 0.03847 0.16031   2
   0   1  -1 0.03135 0.11004  10
   0  -1   1 0.01802 0.11281  10
   0  -1   1 0.01943 0.24749   1
   0  -1   1 -0.0325 0.13227   7
   0  -1  -1 0.20797 0.26950   1
   0  -1  -1 -0.0133 0.15159   6
   0  -1  -1 -0.1255 0.17459   8
   0   1  -1 0.00985 0.24777   1
   0   1   1 -0.0644 0.23883   1
   0   1  -1 -0.0381 0.12405   7
   0  -1   1 0.11338 0.12887   7
   1   1  -1 1423.31 34.5749   7
   1   1  -1 1525.98 36.2643   1
  -1   1   1 1471.41 34.8167   9
  -1  -1  -1 1389.14 34.9878   9
   1   1  -1 1396.68 34.3159   6
   1  -1   1 1416.94 34.7146   2
  -1   1   1 1415.33 35.5145   8
   1   1  -1 1400.38 34.2764  10
  -1   1   1 1437.00 34.5400   7
  -1  -1  -1 1445.46 36.5018   8
  -1  -1  -1 1437.13 35.1072   9
   1  -1   1 1400.71 35.2445   4
   1   1  -1 1435.45 34.8841   7
  -1  -1  -1 1397.30 34.6716   4
   1   1  -1 1279.10 34.3434  10
  -1   1   1 1400.71 35.2822   8
   1   1  -1 1442.16 35.2556   2
   1   1  -1 1425.10 34.6126   9
   1  -1   1 1389.25 35.1547   5
  -1   1   1 1430.42 35.2931   2
   1  -1   1 1401.17 34.2927   2
  -1   1   1 1403.89 36.2340   1
   1  -1   1 1297.81 35.3756   1
   1   1  -1 1417.16 35.2451   8
   1  -1   1 1424.56 36.0832   8
  -1  -1  -1 1411.75 35.2045   5
  -1  -1  -1 1471.89 35.7850   1
   1   1  -1 1390.33 34.8602   2
   1  -1   1 1345.27 34.6610   7
  -1   1   1 1439.71 34.4010  10
  -1  -1  -1 1461.94 35.4477   1
  -1   1  -1 1365.10 34.8434  10
  -1   1  -1 1312.66 34.9319   8
   1  -1  -1 1350.34 34.7248   5
   1  -1  -1 1276.78 34.6795   1
  -1  -1   1 1436.20 34.9395   1
   1   1   1 1323.02 35.1221   8
  -1  -1   1 1323.14 34.2865   7
   1   1   1 1308.52 34.4923   4
   1  -1  -1 1378.16 34.3485   6
   1  -1  -1 1381.86 34.6883   9
  -1  -1   1 1324.47 35.1233   5
  -1   1  -1 1378.41 34.7736   1
  -1  -1   1 1377.26 34.7306   9
   1  -1  -1 1382.42 34.5784   2
  -1  -1   1 1280.39 35.1323   8
   1  -1  -1 1347.52 35.3089   8
  -1   1  -1 1328.73 34.7093   2
   1  -1  -1 1299.96 34.6841  10
  -1  -1   1 1362.27 35.1092   2
  -1  -1   1 1397.72 34.7610  10
  -1   1  -1 1308.68 34.4764   4
  -1   1  -1 1312.01 34.8263   9
  -1  -1   1 1340.65 34.6112   9
   1   1   1 1424.86 35.4416   1
   1   1   1 1301.97 34.4563   5
   1  -1  -1 1314.95 34.5808   2
  -1   1  -1 1335.92 34.6716   2
  -1  -1   1 1413.76 34.2370  10
  -1   1  -1 1324.10 34.2516   5
   1  -1  -1 1344.80 34.5472   7
   2  -1   1 0.82909 0.59350   1
  -2   1   1 0.80742 0.39339  10
  -2  -1  -1 1.13571 0.59783   9
   2  -1   1 0.21721 0.41511   2
   2  -1   1 0.32473 0.40603   7
   2   1  -1 -0.0676 0.56322   9
  -2   1   1 1.40669 0.64601   8
   2   1  -1 -0.3016 0.38460   2
  -2  -1  -1 0.91991 0.50735   4
  -2   1   1 1.13792 0.50253   2
   2   1  -1 0.50556 0.75740   8
  -2   1   1 0.69951 0.46385   2
  -2   1   1 1.43544 0.61291   1
   2  -1   1 0.75623 0.51844   5
  -2   1   1 0.24914 0.39427   7
   2   1  -1 0.26846 0.30670  10
   2   1  -1 0.24155 0.34688   1
  -2  -1  -1 0.46018 0.58430   5
   2   1  -1 0.16766 0.35385   7
   2  -1   1 1.28110 0.80335   8
   2  -1   1 0.43247 0.48531   2
  -2  -1  -1 1.27190 0.81819   8
  -2  -1  -1 0.58203 0.39147   2
  -2  -1  -1 0.67679 0.30795   7
   2   1  -1 -0.0710 0.36711   1
  -2  -1  -1 0.42947 0.34509   2
  -2  -1  -1 0.49425 0.22018  10
   2   1  -1 0.37835 0.53920   5
   2  -1   1 0.54845 0.56764   4
   2  -1   1 0.31424 0.38429  10
  -2  -1  -1 0.94609 0.58146   9
  -2  -1  -1 0.30311 0.35278   1
  -2   1   1 0.52627 0.51198   5
  -2  -1  -1 0.44310 0.22200  10
  -2   1   1 1.45449 0.64254   8
   2  -1   1 0.66970 0.66132   9
  -2  -1   1 0.14538 0.65584   8
  -2  -1   1 -0.0493 0.37365   7
   2  -1  -1 1.02846 0.62420   8
  -2   1  -1 1.17278 0.75186   8
   2   1   1 1.11403 0.58470   5
   2   1   1 0.28807 0.29696   2
  -2  -1   1 -0.1335 0.29852  10
  -2   1  -1 0.33691 0.48122   5
   2  -1  -1 1.28796 0.54414   2
   2  -1  -1 0.86635 0.51859   5
  -2   1  -1 0.51255 0.48586   7
   2  -1  -1 0.76348 0.56504   8
   2  -1  -1 1.28348 0.47368   2
   2   1   1 2.07337 0.87586   8
   2   1   1 0.74560 0.57886   9
  -2   1  -1 0.68040 0.55998   1
  -2  -1   1 0.52558 0.50507   5
   2  -1  -1 1.41411 0.76239   9
  -2   1  -1 0.18258 0.43112   2
   2  -1  -1 0.42649 0.41451   7
  -2  -1   1 0.79720 0.72314   8
   2  -1  -1 0.74835 0.54412   1
   2   1   1 -0.1869 0.31317   1
   2   1   1 1.29289 0.51325   4
  -2   1  -1 0.74351 0.45089   2
  -2   1  -1 0.32954 0.67901   9
  -2  -1   1 0.29291 0.35919   1
  -2   1  -1 0.12410 0.51441   4
  -2  -1   1 -0.2238 0.36390   2
   2   1   1 0.27202 0.26632   2
  -2  -1   1 0.13444 0.60881   9
  -2   1  -1 0.37264 0.35502  10
   2  -1  -1 0.38882 0.34243  10
   2  -1  -1 1.18159 0.60203   4
  -2  -1   1 -0.1573 0.38402   2
  -3  -1  -1 6047.10 153.106   5
  -3   1   1 5822.03 153.594   1
  -3   1   1 6115.88 153.464   9
   3  -1   1 5852.64 154.461   4
   3  -1   1 5852.84 150.710   7
  -3   1   1 5916.10 151.141   2
  -3   1   1 6047.85 156.426   8
   3  -1   1 6026.69 154.567   9
   3   1  -1 5760.05 151.047   4
   3   1  -1 5948.96 151.464   2
  -3   1   1 6045.20 151.404  10
   3  -1   1 5963.91 153.367   5
   3  -1   1 5614.99 151.030   2
  -3  -1  -1 5835.37 151.619   2
  -3  -1  -1 6255.13 150.740   9
   3   1  -1 6126.66 155.550   9
  -3  -1  -1 6272.62 163.764   8
  -3   1   1 6006.35 157.341   8
   3   1  -1 5939.79 150.392   1
  -3   1   1 6025.38 154.778   5
  -3  -1  -1 6082.53 156.437   9
   3  -1   1 5439.78 151.842   1
   3   1  -1 6079.48 151.481   1
  -3  -1  -1 5977.82 152.356   2
  -3  -1  -1 5842.86 150.203  10
  -3  -1  -1 6143.18 159.311   8
   3   1  -1 6107.51 153.454   5
   3  -1   1 6055.15 154.826   8
  -3  -1  -1 5976.69 155.652   4
  -3   1   1 5683.08 151.136   7
   3   1  -1 5996.38 152.824   8
  -3   1  -1 6063.43 154.145   5
  -3  -1   1 6380.70 157.110   5
  -3   1  -1 6203.23 151.557  10
   3   1   1 6178.33 154.459   5
  -3  -1   1 5981.48 152.531   2
  -3  -1   1 5944.98 151.385  10
  -3   1  -1 6047.38 151.656   4
   3  -1  -1 5827.25 149.968   5
  -3  -1   1 6096.86 152.056   7
  -3  -1   1 6242.11 154.178   8
   3  -1  -1 6086.65 154.126   2
   3  -1  -1 5971.72 157.606   8
  -3   1  -1 5827.85 152.992   1
  -3  -1   1 6156.98 154.810   8
  -3   1  -1 6409.31 153.058   2
   3   1   1 5822.63 152.493   4
   3   1   1 6732.18 150.984   2
  -3   1  -1 6213.59 151.799   7
   3  -1  -1 6033.30 154.238   4
   3  -1  -1 6076.75 153.605   1
  -3   1  -1 6245.73 158.369   8
  -3  -1   1 6046.86 156.918   9
  -3   1  -1 6136.50 152.554   2
  -3  -1   1 6104.28 152.396   2
  -3   1  -1 6183.01 157.123   9
   3   1   1 6237.66 150.312   1
   3  -1  -1 6162.34 150.194   9
   3   1   1 6190.88 161.227   8
   4  -1   1 0.32625 0.69383   2
  -4   1   1 0.32761 0.76173   5
   4  -1   1 0.33703 0.52470  10
  -4   1   1 0.55374 0.73558   2
   4   1  -1 0.06710 0.94662   9
   4  -1   1 0.34159 1.02108   9
  -4   1   1 -0.0105 0.96634   9
  -4  -1  -1 -0.4395 0.43060  10
  -4  -1  -1 -0.0117 0.66094   7
   4  -1   1 0.71939 0.83910   4
  -4  -1  -1 -0.0962 0.77042   5
  -4   1   1 0.36891 0.96877   8
   4   1  -1 -0.4845 0.43157  10
   4   1  -1 -0.2075 0.53720   7
   4  -1   1 0.50376 0.62191   7
   4   1  -1 -0.1154 0.43351   1
  -4   1   1 0.05962 0.65872   1
   4   1  -1 0.63467 0.87891   5
   4  -1   1 0.02003 0.77990   1
  -4  -1  -1 -0.0276 0.60676   2
  -4   1   1 -0.3740 0.86480   8
  -4   1   1 -0.1929 0.53396  10
   4   1  -1 0.24191 1.12356   8
  -4  -1  -1 0.61168 1.03538   9
   4   1  -1 -0.1217 0.46070   1
   4  -1   1 0.23982 0.78821   5
   4   1  -1 0.12073 0.77682   4
  -4  -1  -1 -0.0788 0.76860   4
   4  -1   1 0.13659 1.02767   8
   4   1  -1 -0.4020 0.60488   2
  -4  -1  -1 -0.1618 1.08303   8
  -4   1   1 0.14116 0.63418   7
  -4  -1  -1 0.32274 0.58733   2
  -4  -1  -1 -0.1179 1.08417   8
  -4  -1   1 -0.0056 1.05979   8
  -4   1  -1 0.40054 0.58417  10
  -4   1  -1 0.41446 0.70540   2
  -4   1  -1 -0.0424 0.76639   4
   4  -1  -1 0.25003 0.79297   5
   4   1   1 -0.2200 1.02259   8
  -4   1  -1 0.46950 1.03720   9
  -4   1  -1 1.07795 0.73631   7
  -4  -1   1 -0.3670 0.59248   2
  -4  -1   1 1.10466 1.04710   9
   4  -1  -1 -0.3436 0.56961  10
  -4   1  -1 0.70035 0.79680   5
  -4   1  -1 -0.1266 1.02419   8
   4   1   1 0.29102 0.88927   9
  -4  -1   1 0.09942 1.03074   8
  -4   1  -1 -0.2253 0.67991   1
   4  -1  -1 0.75221 0.83308   4
   4  -1  -1 0.27599 0.72478   2
   4   1   1 0.12769 0.56130   2
   4   1   1 0.49039 0.71198   4
  -4   1  -1 0.22523 1.04436   8
  -4  -1   1 -0.6192 0.60812   7
   4   1   1 -0.3861 0.83087   5
   4  -1  -1 0.47198 0.91148   8
   4  -1  -1 -0.4127 0.96646   9
  -4  -1   1 -0.4484 0.50676  10
   4  -1  -1 0.14003 0.69865   1
  -4  -1   1 0.19619 0.77717   5
  -5   1   1 3116.74 77.0777   1
   5  -1   1 3080.62 78.0576   4
  -5  -1  -1 3077.80 77.9541   5
   5  -1   1 2992.83 77.7317   5
  -5   1   1 3123.10 79.9827   8
  -5   1   1 2948.69 76.5362   7
  -5  -1  -1 3035.54 79.0665   9
   5   1  -1 2873.43 75.3208  10
   5   1  -1 2970.72 75.7612   1
   5  -1   1 2943.91 75.6389  10
   5   1  -1 2846.78 75.6318   1
  -5  -1  -1 3001.88 80.2937   8
  -5   1   1 3079.49 77.8067   5
   5  -1   1 3017.75 76.8681   2
  -5   1   1 3036.13 76.3855  10
  -5  -1  -1 3025.39 76.3111   7
   5   1  -1 2925.42 75.6777   7
  -5   1   1 3070.34 77.3497   2
   5   1  -1 3024.81 77.8964   4
  -5   1   1 3057.11 79.5234   9
  -5  -1  -1 3156.01 81.1417   8
   5  -1   1 3076.21 79.8442   8
   5   1  -1 3047.55 78.8133   9
   5   1  -1 3103.40 76.6813   2
   5   1  -1 3097.06 78.0348   5
  -5  -1  -1 3132.04 76.1658  10
   5  -1   1 3011.12 79.1136   9
   5  -1   1 3177.45 77.1002   1
   5  -1   1 2810.53 75.9424   7
  -5  -1  -1 3019.00 76.9861   2
  -5   1   1 3095.47 79.5221   8
  -5  -1   1 3084.85 78.0229   5
  -5   1  -1 3116.81 80.3550   8
   5  -1  -1 3062.88 77.0289   2
  -5  -1   1 3149.93 79.3830   9
   5  -1  -1 3079.88 77.1063   1
  -5   1  -1 3095.01 76.9131   1
   5   1   1 3126.17 80.5275   8
   5   1   1 3040.49 78.6780   9
  -5   1  -1 3102.63 77.7328   5
  -5  -1   1 3064.30 77.1750   2
  -5   1  -1 3063.35 77.2985   2
  -5   1  -1 3078.52 76.5444   7
  -5  -1   1 3090.07 80.6310   8
  -5   1  -1 3097.54 78.2233   4
  -5  -1   1 3060.48 76.4804   7
   5   1   1 3072.33 77.7018   4
   5   1   1 3173.33 76.3076   2
   5  -1  -1 3031.39 79.1082   9
   5  -1  -1 3102.62 79.5090   8
  -5  -1   1 3086.79 76.3007  10
   5  -1  -1 3049.87 78.1255   4
  -5   1  -1 3159.98 80.2853   8
  -5   1  -1 3122.86 79.7127   9
   5  -1  -1 3103.97 77.8224   5
  -5  -1   1 3124.03 80.1780   8
  -5   1  -1 3112.24 76.3533  10
   5   1   1 3091.78 78.0789   5
   6   1  -1 -0.0992 0.57249   7
   6  -1   1 -0.7059 1.30217   9
  -6  -1  -1 0.15496 0.89845   2
  -6   1   1 0.22325 0.85068   7
   6   1  -1 -0.4066 0.50511   7
   6   1  -1 0.10752 1.40277   9
  -6   1   1 0.55062 1.49530   9
  -6   1   1 0.16170 1.36512   8
  -6  -1  -1 -0.7842 1.26307   9
   6   1  -1 -0.4260 0.85235   2
  -6   1   1 0.08752 0.78902  10
  -6  -1  -1 -0.0984 0.71219  10
   6  -1   1 0.26474 1.47882   8
  -6   1   1 -0.6543 1.04567   5
  -6  -1  -1 -0.4914 1.04826   5
   6  -1   1 -0.1770 0.66348   7
   6  -1   1 -0.1190 0.55216  10
  -6  -1  -1 -0.0134 1.55974   8
   6   1  -1 -0.2822 1.05519   4
  -6   1   1 -0.1616 1.49093   8
   6  -1   1 -0.8027 0.85169   2
  -6   1   1 -0.2344 0.86732   1
  -6  -1  -1 0.30645 0.84779   7
   6  -1   1 -0.4557 1.04672   4
  -6   1   1 0.98410 1.04578   2
   6  -1   1 -0.2621 0.87216   1
   6  -1  -1 0.14789 0.89806   1
   6   1   1 0.28489 1.32863   9
   6  -1  -1 -0.0561 0.65415  10
  -6  -1   1 -1.2373 1.02347   5
  -6  -1   1 0.19250 0.86043   7
   6   1   1 0.12636 1.42255   8
  -6   1  -1 -0.5192 1.37552   9
  -6  -1   1 -0.4788 0.77703  10
  -6  -1   1 -0.7677 1.35626   8
  -6   1  -1 -0.4925 1.07688   5
  -6   1  -1 0.35222 1.01723   2
  -6  -1   1 0.20511 0.93128   2
  -6   1  -1 0.06378 0.82673   1
   6  -1  -1 0.99573 1.01155   2
   6  -1  -1 -0.6812 1.05882   4
  -6   1  -1 0.66199 0.92606   7
  -6  -1   1 0.43511 1.50302   9
  -6   1  -1 0.18239 1.58691   8
   6  -1  -1 -0.1975 1.38292   9
   6  -1  -1 -0.0975 0.86584   1
  -6   1  -1 -0.0003 0.76454  10
   6   1   1 0.40208 0.74711   2
  -7  -1  -1 25.2196 2.35204   7
  -7  -1  -1 21.9163 4.21149   8
  -7   1   1 28.9366 2.48851   7
  -7   1   1 26.3329 2.34874   1
  -7   1   1 28.5573 3.08498   5
  -7   1   1 22.3936 4.09114   8
  -7  -1  -1 26.9215 3.13606   5
  -7  -1  -1 27.4814 2.26103  10
   7  -1   1 22.7241 3.71620   8
  -7  -1  -1 29.1157 4.41934   9
  -7   1   1 24.9446 2.25147  10
  -7   1   1 27.2444 3.98449   9
  -7   1   1 23.7824 2.76240   2
  -7  -1  -1 26.4021 2.71369   2
  -7   1  -1 27.7991 2.84323   2
  -7   1  -1 29.5463 3.12378   5
   7  -1  -1 29.1288 3.33124   1
  -7   1  -1 26.9564 4.14706   8
  -7  -1   1 29.0744 2.33549  10
  -7   1  -1 29.8071 2.50530   7
  -7   1  -1 27.1312 4.33509   9
  -7   1  -1 28.1385 2.25295   1
   7   1   1 28.6785 4.16737   8
  -7  -1   1 24.2708 3.94573   9
  -7  -1   1 23.8758 2.66036   2
   7  -1  -1 27.3341 1.76840  10
  -7  -1   1 27.9436 4.21982   8
  -7   1  -1 26.2314 2.29966  10
  -7  -1   1 26.2364 3.45056   5
  -7  -1   1 27.8191 2.40734   7
  -8   1   1 0.39030 1.54042   5
  -8   1   1 -0.1572 1.15574   7
  -8  -1  -1 0.64328 1.94997   9
  -8  -1  -1 0.27787 1.25422   2
  -8  -1  -1 -0.8079 0.94291  10
  -8   1   1 1.30651 2.00576   9
  -8   1   1 0.56757 1.92409   8
  -8   1   1 -0.7327 1.21155   2
  -8   1   1 -0.2720 1.04613  10
  -8  -1  -1 -1.3415 1.38858   5
   8  -1   1 0.39071 1.98936   8
  -8  -1  -1 -0.0916 2.08731   8
  -8  -1  -1 0.43583 1.22552   7
  -8   1  -1 -0.7813 1.16628   7
  -8   1  -1 0.38228 1.65151   5
  -8   1  -1 -0.8391 1.86993   8
  -8  -1   1 0.52893 1.82608   9
  -8  -1   1 -0.3529 1.34336   2
  -8   1  -1 -0.3235 1.05419  10
  -8   1  -1 -0.3390 1.90152   9
  -8  -1   1 -0.6294 1.37986   5
  -8  -1   1 -0.1987 1.01336  10
  -8   1  -1 -1.1506 1.21709   2
  -8  -1   1 -0.4613 2.08189   8
  -8  -1   1 -0.4491 1.15891   7
  -9   1   1 208.628 9.41640   2
  -9  -1  -1 218.289 8.47512   7
  -9   1   1 211.934 9.89260   5
  -9  -1  -1 215.986 12.9229   8
  -9  -1  -1 205.850 11.8123   9
  -9  -1  -1 212.383 10.0924   5
  -9   1   1 209.331 12.1878   8
  -9   1   1 213.388 12.1322   9
  -9  -1  -1 210.274 9.33680   2
  -9   1   1 210.427 8.18139  10
  -9   1   1 209.009 8.47111   7
  -9  -1  -1 203.264 8.02038  10
  -9   1  -1 229.616 8.62324   7
  -9   1  -1 212.971 12.0449   9
  -9  -1   1 226.904 10.3114   5
  -9  -1   1 222.393 8.26078  10
  -9   1  -1 224.791 12.7213   8
  -9  -1   1 224.564 12.1346   9
  -9  -1   1 216.240 9.39250   2
  -9   1  -1 234.633 8.41461  10
  -9   1  -1 212.512 9.85236   5
  -9  -1   1 227.522 8.63647   7
  -9   1  -1 216.715 9.56448   2
  -9  -1   1 233.696 13.1745   8
 -10   1   1 -0.0929 1.53180   7
 -10  -1  -1 0.07517 2.67732   8
 -10  -1  -1 0.33719 2.51017   9
 -10   1   1 -1.2630 2.23415   9
 -10   1   1 0.27642 1.45027  10
 -10  -1  -1 -0.8108 1.36321  10
 -10  -1  -1 2.29054 1.75167   7
 -10  -1  -1 -2.1104 1.43067   2
 -10   1   1 -0.0658 1.84025   2
 -10   1  -1 -0.1652 2.37496   9
 -10  -1   1 -0.6905 1.59371   2
 -10   1  -1 -1.0055 1.38616  10
 -10  -1   1 0.36378 1.57597   7
 -10  -1   1 -1.0242 2.30254   8
 -10   1  -1 -0.4677 1.69430   2
 -10   1  -1 -0.3951 2.79306   8
 -10   1  -1 1.01200 1.72125   7
 -10  -1   1 -1.9212 1.20758  10
 -10  -1   1 0.00107 2.44723   9
 -11   1   1 98.5943 6.05145   7
 -11   1   1 94.2585 6.86902   2
 -11  -1  -1 94.0620 9.03853   9
 -11   1   1 100.143 5.78541  10
 -11  -1  -1 85.5179 6.55949   2
 -11  -1  -1 101.236 5.96581   7
 -11  -1  -1 92.2581 5.58568  10
 -11  -1   1 98.6354 6.04448   7
 -11   1  -1 101.595 9.49514   9
 -11   1  -1 96.5484 5.72085  10
 -11   1  -1 101.992 6.00954   7
 -11  -1   1 102.859 6.92804   2
 -11   1  -1 99.8680 7.02250   2
 -11  -1   1 108.935 9.59403   9
 -11  -1   1 88.2264 5.45528  10
   0   2   1 253.743 7.40113   1
   0  -2   1 253.723 6.47603  10
   0   2  -1 252.095 6.43938   7
   0   2   1 254.072 6.98088   8
   0   2  -1 226.033 6.61795   2
   0  -2   1 273.350 7.54481   1
   0   2  -1 240.151 6.86375   4
   0  -2   1 263.114 6.94177   4
   0   2   1 247.619 7.01467   8
   0  -2   1 266.324 6.52036   7
   0  -2   1 260.200 7.22819   9
   0  -2   1 268.874 6.68911   2
   0   2   1 251.806 7.33635   3
   0   2  -1 252.896 6.46208   7
   0  -2  -1 243.225 7.01100   8
   0  -2  -1 261.634 7.43798   1
   0  -2   1 257.891 6.71879   2
   0  -2   1 246.362 6.53019   7
   0  -2   1 264.852 6.44910  10
   0  -2  -1 252.979 6.96735   8
   0   2  -1 261.511 7.57212   8
   0   2  -1 266.913 6.63297   6
   0   2  -1 273.216 6.64571   2
   0  -2   1 263.883 7.59054   8
   0  -2  -1 248.247 7.30608   3
  -1   2   1 11.8129 0.71702   2
  -1   2   1 11.6697 1.21912   1
   1  -2   1 7.97283 1.05045   9
  -1  -2  -1 14.4858 1.36210   8
   1  -2   1 8.61422 0.79108   2
   1  -2   1 12.5352 0.71609   5
   1  -2   1 10.3678 0.93886   4
   1   2  -1 11.8051 1.36560   8
  -1  -2  -1 12.5509 0.92212   1
  -1  -2  -1 11.4093 0.54783   4
   1  -2   1 13.4325 1.23860   8
   1   2  -1 9.34508 0.85304   5
  -1   2   1 11.8165 0.78701   2
   1   2  -1 10.3991 0.57888   2
   1   2  -1 9.38324 0.58296   2
  -1   2   1 10.3080 0.54079  10
  -1   2   1 14.6472 1.13860   9
  -1  -2  -1 9.89023 0.61746   9
  -1  -2  -1 12.3038 0.95309   5
   1  -2   1 10.6208 0.66537  10
   1   2  -1 9.03487 0.94387   1
   1  -2   1 9.84253 0.72360   7
   1  -2   1 8.58528 1.14304   1
  -1   2   1 11.7215 0.59506   7
  -1  -2   1 9.89954 0.94824   1
  -1  -2   1 10.4960 0.87975   5
   1   2   1 13.2259 0.98042   5
  -1  -2   1 10.7556 0.51322   7
  -1   2  -1 12.8166 1.22954   8
   1  -2  -1 10.8010 1.16493   1
  -1   2  -1 11.8207 0.93091   2
  -1   2  -1 10.7873 0.97863   4
  -1  -2   1 10.8429 1.34339   8
   1  -2  -1 11.5854 0.58362  10
  -1   2  -1 11.9188 0.69511   5
  -1  -2   1 9.74249 0.99923   9
  -1   2  -1 10.6652 0.68523  10
   1  -2  -1 12.0147 0.78505   2
   1  -2  -1 11.0487 0.62379   7
  -1   2  -1 7.96514 0.73056   2
   1  -2  -1 11.4342 0.74463   2
  -1  -2   1 11.2891 0.64784   2
  -1   2  -1 13.3160 1.30083   9
  -1   2  -1 9.64703 0.69588   7
  -1  -2   1 10.1837 0.68439   2
  -1  -2   1 9.83674 0.47254   7
   1  -2  -1 14.9817 1.15565   9
   1  -2  -1 10.9797 0.57498   6
  -1  -2   1 13.1603 0.98660   9
  -2   2   1 196.937 5.69008   5
  -2   2   1 187.060 5.69232   2
   2  -2   1 192.917 5.74714   2
  -2  -2  -1 186.367 7.13754   8
   2   2  -1 200.078 5.41920   1
   2  -2   1 192.084 6.10341   4
  -2  -2  -1 206.566 5.06794   2
  -2  -2  -1 187.285 5.02209   2
  -2  -2  -1 188.735 6.99252   8
   2   2  -1 182.685 6.99087   8
  -2   2   1 186.681 5.40191   7
  -2  -2  -1 184.058 5.20309   1
  -2   2   1 193.724 5.33747  10
   2  -2   1 187.881 5.29248  10
  -2   2   1 180.842 6.43711   9
  -2  -2  -1 191.375 5.19282   1
  -2   2   1 186.166 6.33069   1
   2   2  -1 191.841 5.98935   5
   2  -2   1 182.020 5.89789   2
   2  -2   1 187.465 6.53152   9
   2  -2   1 182.400 5.60476   5
  -2   2   1 176.285 5.77335   8
   2  -2   1 182.750 6.39475   8
   2  -2   1 192.872 6.37866   1
  -2  -2  -1 186.820 5.59625   4
  -2   2   1 179.498 5.87310   8
  -2  -2  -1 184.658 5.82723   9
  -2  -2  -1 181.062 5.95407   5
  -2  -2  -1 199.416 5.91126   9
  -2   2  -1 196.864 5.71669   2
  -2  -2   1 189.057 5.14691   7
  -2  -2   1 183.299 7.05186   8
   2  -2  -1 198.847 6.41145   1
   2  -2  -1 185.622 5.65978   2
  -2   2  -1 200.861 5.40405  10
   2  -2  -1 189.862 5.85296   8
   2   2   1 187.357 5.47270   4
  -2  -2   1 192.642 6.25624   9
   2  -2  -1 180.607 5.37539   7
  -2   2  -1 185.752 6.50534   8
  -2   2  -1 194.131 6.09343   4
   2  -2  -1 188.220 5.28121  10
  -2  -2   1 185.609 6.88481   8
   2  -2  -1 184.447 6.02707   4
  -2  -2   1 185.630 6.09331   9
   2  -2  -1 198.548 6.45387   9
  -2   2  -1 193.341 5.45270   7
   2  -2  -1 195.702 5.69920   2
  -2   2  -1 192.634 6.36792   1
  -2  -2   1 201.558 5.43258   1
  -2  -2   1 192.930 5.43547   2
  -2  -2   1 186.199 5.07607  10
  -2  -2   1 191.356 5.52271   2
  -2   2  -1 192.379 5.60963   5
   2  -2  -1 189.066 5.64350   5
   2   2   1 194.548 6.05166   5
   2   2   1 184.560 6.93381   8
  -2   2  -1 191.565 5.79908   2
   3   2  -1 24.4328 0.96879   7
   3  -2   1 19.9547 2.13900   9
   3  -2   1 26.0033 1.40861  10
   3  -2   1 20.7478 1.95365   1
   3   2  -1 26.3082 2.09348   9
  -3   2   1 31.7755 1.91524   2
   3  -2   1 21.7163 1.66961   2
   3   2  -1 31.1998 2.11803   5
  -3  -2  -1 22.9565 1.42877   2
  -3  -2  -1 33.6902 2.25286   9
   3   2  -1 30.6779 1.95981   4
   3  -2   1 29.2092 2.10098   4
   3  -2   1 31.1173 1.91725   5
  -3   2   1 32.0643 2.22212   1
  -3   2   1 27.2527 1.58010   7
  -3  -2  -1 24.1807 1.17326   7
  -3  -2  -1 29.5977 2.05963   5
  -3  -2  -1 32.2724 1.95518   4
  -3  -2  -1 26.9800 1.47776   2
  -3  -2  -1 37.7137 3.16805   8
  -3   2   1 28.1205 1.83948   5
  -3  -2  -1 27.0291 1.06936  10
  -3   2   1 26.7939 1.49641  10
  -3  -2  -1 24.2716 1.98346   9
   3   2   1 35.9030 2.97130   8
  -3   2  -1 35.2620 2.71410   9
  -3  -2   1 30.0435 1.72532   2
   3   2   1 30.5131 1.81060   4
   3   2   1 29.6657 2.09852   5
  -3  -2   1 23.6906 1.55351   2
   3  -2  -1 22.0335 1.68714   2
   3  -2  -1 31.7960 2.19952   4
   3  -2  -1 27.9177 1.82929   5
   3  -2  -1 22.8428 1.97738   1
  -3   2  -1 25.2803 1.47816  10
  -3   2  -1 24.1347 1.53409   7
  -3   2  -1 30.5413 1.84980   5
  -3  -2   1 25.8708 1.37947   7
  -3  -2   1 29.4122 2.05621   5
  -3   2  -1 33.1523 2.57943   8
  -3   2  -1 30.7440 2.16612   4
  -3  -2   1 36.2707 2.46442   9
  -3   2  -1 22.0789 1.92761   1
  -3  -2   1 27.8113 1.34779  10
   3  -2  -1 27.7484 1.44902  10
  -3   2  -1 32.9817 1.95849   2
  -3  -2   1 36.1498 3.00707   8
  -4  -2  -1 332.327 9.53403   2
   4  -2   1 338.598 10.4971   1
  -4  -2  -1 321.816 10.8199   9
  -4  -2  -1 301.398 8.82369  10
  -4   2   1 346.542 10.2305   5
  -4   2   1 322.458 9.96892   2
   4  -2   1 327.033 10.5683   4
  -4  -2  -1 327.983 10.4578   5
   4   2  -1 331.375 8.40727   7
   4   2  -1 332.021 10.7938   9
   4  -2   1 330.983 9.08279  10
  -4  -2  -1 316.430 10.1790   4
  -4  -2  -1 315.998 12.3740   8
   4  -2   1 355.105 11.5566   9
   4   2  -1 312.315 10.1387   4
   4  -2   1 322.177 11.3320   8
  -4  -2  -1 345.295 11.6564   9
   4   2  -1 315.499 12.0835   8
  -4   2   1 328.393 9.49208   7
   4  -2   1 346.864 9.99773   2
  -4  -2  -1 312.892 11.9786   8
  -4  -2  -1 325.722 9.53509   2
  -4  -2  -1 321.402 9.04228   7
   4   2  -1 325.462 10.4600   5
  -4   2   1 312.358 10.8790   8
  -4   2   1 312.011 11.3318   9
   4  -2   1 320.817 10.1032   5
  -4   2   1 330.958 10.4070   1
  -4   2   1 324.654 11.2157   8
  -4   2   1 331.982 9.33819  10
  -4  -2   1 321.594 11.8763   8
   4   2   1 344.605 10.8450   9
   4  -2  -1 328.821 10.0976   5
  -4  -2   1 328.419 11.0115   9
  -4  -2   1 333.959 9.79937   2
   4  -2  -1 342.933 11.4020   9
   4   2   1 332.818 8.71669   2
  -4  -2   1 324.287 9.21515   7
  -4  -2   1 319.366 12.2196   8
  -4  -2   1 299.977 9.04177  10
   4   2   1 322.790 9.98264   4
  -4  -2   1 334.979 10.5117   5
  -4   2  -1 338.316 9.35523  10
  -4   2  -1 310.663 11.4355   9
   4   2   1 310.770 10.4084   5
  -4  -2   1 328.699 9.66740   2
  -4   2  -1 321.303 11.5243   8
  -4   2  -1 338.640 10.4179   1
   4  -2  -1 334.220 10.4201   1
   4  -2  -1 334.994 9.93541   2
   4   2   1 318.320 12.0746   8
  -4   2  -1 331.819 10.6305   4
  -4   2  -1 334.248 9.48714   7
  -4   2  -1 328.325 10.0434   2
  -4   2  -1 333.350 10.0851   5
   4  -2  -1 331.291 11.0260   8
   4  -2  -1 325.343 10.5909   4
  -5   2   1 6.71080 1.45671   2
  -5  -2  -1 6.72160 1.01863  10
   5  -2   1 6.17710 1.49510   5
  -5  -2  -1 9.00774 2.59635   8
  -5  -2  -1 3.71859 1.09975   2
   5  -2   1 8.05369 1.73907   4
   5  -2   1 4.69137 1.30828   2
  -5  -2  -1 6.58754 1.32880   2
   5   2  -1 6.79418 1.59141   4
   5   2  -1 5.46314 1.61761   5
  -5   2   1 6.55547 2.00593   9
  -5   2   1 6.44411 1.24976   7
  -5   2   1 7.25141 2.06985   8
  -5   2   1 6.70808 1.20537  10
   5  -2   1 4.29395 1.61640   1
  -5  -2  -1 8.48017 2.08704   9
  -5  -2  -1 5.40331 1.47390   5
  -5  -2  -1 6.97695 1.20874   7
   5   2  -1 4.68165 1.64391   9
   5  -2   1 7.59569 1.06132  10
  -5   2   1 6.70186 1.51806   5
   5  -2   1 10.0962 2.28309   8
   5  -2   1 4.36825 1.67771   9
  -5   2   1 8.38901 1.65095   1
  -5   2   1 7.29747 2.03221   8
  -5  -2   1 5.26274 1.07333  10
  -5   2  -1 7.16152 2.11527   8
  -5  -2   1 5.66391 1.33257   2
   5   2   1 7.67714 1.53324   4
  -5   2  -1 5.40805 1.90667   9
   5   2   1 3.17358 0.77431   2
   5  -2  -1 8.28640 2.04894   8
   5   2   1 10.1562 2.54050   8
  -5  -2   1 7.72360 1.98409   9
   5  -2  -1 5.39446 1.43019   5
  -5  -2   1 7.01644 2.22185   8
  -5   2  -1 6.41061 1.14581  10
  -5   2  -1 5.21617 1.18894   7
   5  -2  -1 6.40049 1.10288  10
  -5   2  -1 5.27838 1.37004   5
  -5  -2   1 4.75301 1.12364   7
   5   2   1 7.48551 1.76801   5
  -5   2  -1 8.66179 2.24516   8
  -5   2  -1 5.27724 1.38584   1
   5  -2  -1 4.08704 1.66112   9
   5  -2  -1 4.47566 1.24797   2
   5   2   1 4.19749 1.54265   9
   5  -2  -1 7.07216 1.68667   4
  -5  -2   1 5.08002 1.43883   5
  -5   2  -1 9.24122 1.83688   4
  -5  -2   1 8.40503 2.40170   8
  -5   2  -1 8.53759 1.59683   2
  -6  -2  -1 293.377 9.77854   2
  -6   2   1 301.385 9.49862   7
   6   2  -1 307.458 11.4729   9
   6  -2   1 304.005 12.0639   9
  -6  -2  -1 306.141 10.8479   5
  -6  -2  -1 294.695 13.1882   8
  -6   2   1 309.984 9.31752  10
   6  -2   1 316.437 9.98168   2
   6  -2   1 295.699 12.0801   8
  -6   2   1 287.637 10.0262   1
  -6  -2  -1 305.858 9.22058   7
  -6   2   1 298.923 12.3133   9
  -6  -2  -1 309.211 9.03453  10
   6   2  -1 292.733 9.07611   2
  -6   2   1 275.051 11.6282   8
  -6   2   1 292.112 10.1748   2
  -6   2   1 301.615 10.5174   5
  -6  -2  -1 285.266 11.5713   9
  -6   2   1 281.599 11.9502   8
   6  -2   1 291.140 10.8302   4
   6  -2   1 293.860 8.59284  10
  -6  -2   1 302.314 9.14805  10
  -6   2  -1 300.285 12.3646   9
  -6  -2   1 292.524 12.9712   8
   6   2   1 292.005 12.7287   8
  -6   2  -1 303.768 10.0475   1
  -6   2  -1 312.008 9.33862  10
   6   2   1 291.710 8.49979   2
  -6  -2   1 285.656 9.87489   2
  -6   2  -1 301.479 10.4256   5
  -6  -2   1 300.544 9.30425   7
  -6   2  -1 297.367 12.4582   8
   6  -2  -1 311.860 12.0124   9
   6  -2  -1 316.819 10.0825   2
  -6   2  -1 297.581 10.2455   2
   6  -2  -1 299.938 11.8582   8
  -6   2  -1 300.955 9.47011   7
  -6  -2   1 305.236 10.8995   5
   6  -2  -1 299.706 10.9390   4
  -6  -2   1 305.059 11.9072   9
  -7   2   1 2.35833 1.39723   2
  -7  -2  -1 2.16903 1.02327  10
   7  -2   1 4.57566 2.23949   8
  -7  -2  -1 1.73260 1.57632   5
  -7   2   1 4.74399 1.48419   1
  -7   2   1 2.64997 1.48880   5
  -7  -2  -1 2.76195 1.37681   2
  -7  -2  -1 2.97932 1.25548   7
  -7  -2  -1 4.44687 2.21228   9
  -7   2   1 2.28503 1.07507  10
  -7   2   1 6.11696 2.61465   9
  -7  -2  -1 3.38678 2.41205   8
  -7   2   1 2.50647 1.22926   7
   7  -2   1 2.61753 0.85254  10
  -7   2   1 3.02062 2.04192   8
  -7   2  -1 2.87404 1.47955   2
  -7  -2   1 2.70858 1.16831  10
  -7   2  -1 2.61976 1.25736   7
  -7   2  -1 5.43384 2.65787   9
  -7  -2   1 5.15902 2.24787   9
   7  -2  -1 2.54423 1.37820   2
  -7   2  -1 3.00819 1.57405   5
  -7  -2   1 4.50741 2.49173   8
  -7   2  -1 4.48235 1.41527   1
   7  -2  -1 5.14849 1.55460   1
   7  -2  -1 2.46901 0.94740  10
  -7  -2   1 2.59625 1.16954   7
  -7   2  -1 2.78691 1.17068  10
  -7  -2   1 3.72846 1.48702   2
   7   2   1 3.92539 2.32393   8
  -7   2  -1 4.90720 2.43111   8
  -7  -2   1 2.28769 1.57281   5
  -8   2   1 9.44244 3.18787   8
  -8   2   1 11.1495 2.63069   5
  -8  -2  -1 13.2905 2.20396   7
  -8   2   1 6.48394 2.09412   2
  -8   2   1 11.5102 2.14689   7
  -8  -2  -1 11.6698 1.91766  10
  -8  -2  -1 10.9377 2.81267   5
  -8  -2  -1 7.68334 3.26978   8
  -8  -2  -1 13.3885 3.59082   9
   8  -2   1 8.21919 2.93869   8
  -8  -2  -1 12.4966 2.43873   2
  -8   2   1 13.8721 3.98209   9
  -8   2   1 11.3531 1.98048  10
  -8  -2   1 10.7625 3.21537   9
  -8  -2   1 10.5786 2.04267   7
  -8  -2   1 9.10439 2.46928   5
  -8   2  -1 13.3253 3.60443   8
  -8   2  -1 9.92847 3.22711   9
  -8   2  -1 13.6553 2.73059   2
  -8  -2   1 7.91965 3.32766   8
  -8   2  -1 9.16809 1.84660  10
  -8   2  -1 9.08068 2.54072   5
  -8  -2   1 12.2325 2.47639   2
  -8  -2   1 11.7984 2.05665  10
  -8   2  -1 10.8369 2.09500   7
  -9  -2  -1 3.45349 2.71049   9
  -9   2   1 0.73851 1.36076  10
  -9  -2  -1 1.34124 1.45876   7
  -9   2   1 0.86090 1.82646   5
  -9   2   1 2.95275 1.69319   7
  -9   2   1 2.43333 2.59350   9
   9  -2   1 3.75785 2.76994   8
  -9   2   1 0.20742 2.46524   8
  -9  -2  -1 2.27575 2.74037   8
  -9  -2  -1 1.39139 1.69988   2
  -9   2   1 1.91206 1.76278   2
  -9  -2  -1 0.04261 2.31853   5
  -9  -2  -1 1.64202 1.37757  10
  -9  -2   1 0.98914 1.29831  10
  -9  -2   1 2.46762 2.50987   9
  -9   2  -1 2.30279 1.61361   7
  -9   2  -1 0.65004 1.67914   2
  -9   2  -1 1.37510 2.63393   9
  -9  -2   1 1.90360 1.59765   7
  -9  -2   1 1.73565 1.73600   2
  -9   2  -1 2.65870 2.04697   5
  -9   2  -1 1.60981 1.39518  10
  -9  -2   1 0.78798 2.48810   8
  -9   2  -1 4.22052 2.91420   8
 -10   2   1 30.5194 6.00578   9
 -10  -2  -1 32.5095 3.46809   7
 -10  -2  -1 33.1830 4.41240   2
 -10   2   1 32.4805 3.60564  10
 -10   2   1 29.8026 4.35841   2
 -10   2   1 31.5774 3.61074   7
 -10  -2  -1 29.9264 6.35815   8
 -10  -2  -1 30.6840 3.50830  10
 -10  -2  -1 29.1283 5.62592   9
 -10  -2   1 31.0902 3.48926   7
 -10   2  -1 31.4218 3.59816  10
 -10   2  -1 24.0726 5.30793   9
 -10  -2   1 30.6729 3.29512  10
 -10   2  -1 30.0613 3.44633   7
 -10  -2   1 28.2056 5.56040   9
 -10  -2   1 33.0628 4.44511   2
 -10  -2   1 29.5905 6.11693   8
 -10   2  -1 31.7192 4.56752   2
 -11  -2  -1 0.16309 1.90454   2
 -11   2   1 -0.3461 1.50250  10
 -11  -2  -1 2.91209 1.92818   7
 -11  -2  -1 -0.3895 2.66708   9
 -11   2   1 1.02883 1.79441   7
 -11  -2  -1 1.59826 1.76190  10
 -11  -2   1 0.53552 1.62252  10
 -11  -2   1 1.49701 1.85152   7
 -11   2  -1 0.14405 1.61335   7
 -11  -2   1 0.98224 2.98961   9
 -11   2  -1 0.56731 2.05300   2
 -11  -2   1 1.93991 1.95437   2
 -11   2  -1 1.63272 1.78883  10
   0   3   1 -0.0395 0.51279   1
   0  -3  -1 0.00250 0.26742   9
   0  -3  -1 0.34866 0.44457   3
   0   3  -1 0.00172 0.19685   2
   0  -3  -1 0.14109 0.21779   9
   0  -3   1 -0.1239 0.56193   1
   0  -3  -1 -0.0150 0.39212   8
   0   3   1 -0.1937 0.44711   3
   0   3  -1 0.01842 0.50638   8
   0  -3   1 0.19733 0.36689   4
   0   3   1 0.30888 0.41254   8
   0  -3   1 0.03944 0.44924   9
   0  -3  -1 0.26389 0.31346   5
   0   3  -1 -0.1041 0.29533   9
   0  -3   1 -0.1645 0.23916   2
   0  -3  -1 -0.3175 0.35376   8
   0   3  -1 -0.2040 0.24749   6
   0  -3   1 0.10634 0.47449   9
   0  -3   1 -0.1870 0.15801   7
   0  -3   1 0.13148 0.52728   8
   0  -3   1 -0.0151 0.24461   2
   0   3  -1 0.05217 0.19165   4
   0   3  -1 -0.0465 0.22378   5
   0   3  -1 -0.0522 0.20597   2
   0  -3   1 -0.0089 0.17184   7
   0  -3  -1 0.48686 0.55101   1
   0   3  -1 -0.1715 0.52612   1
   1  -3   1 6399.37 162.144   1
   1   3  -1 6909.14 162.040   1
   1  -3   1 6117.23 158.354   2
  -1   3   1 6327.72 156.218   2
   1   3  -1 6075.20 164.284   8
  -1   3   1 6232.55 156.516   2
  -1  -3  -1 6263.52 158.953   5
   1  -3   1 6311.19 156.889   7
   1  -3   1 6224.32 156.491  10
   1   3  -1 6290.97 158.577   5
   1  -3   1 6265.47 160.163   4
  -1   3   1 6454.99 156.095   8
  -1  -3  -1 6612.38 167.038   8
  -1  -3  -1 6288.74 161.059   1
  -1   3   1 6341.89 156.509   2
   1  -3   1 6513.36 161.032   9
   1  -3   1 6322.77 161.878   8
   1  -3   1 6443.02 158.318   2
  -1   3   1 6064.02 162.855   1
  -1  -3  -1 6308.00 164.262   8
   1   3  -1 6054.33 161.939   9
  -1   3  -1 6214.52 155.684   5
  -1  -3   1 6287.52 159.153   5
   1  -3  -1 6424.95 154.808   6
   1   3   1 6343.33 161.279   1
   1  -3  -1 6266.14 159.230   4
   1  -3  -1 6635.75 155.261  10
  -1   3  -1 5982.99 158.883   4
   1  -3  -1 6387.19 157.534   2
  -1  -3   1 6382.75 160.276   9
   1  -3  -1 6146.73 156.803   2
  -1  -3   1 6197.75 161.645   1
  -1   3  -1 6503.30 162.716   8
   1  -3  -1 6482.39 155.205  10
  -1   3  -1 6335.10 158.567   2
   1  -3  -1 6311.05 160.498   9
  -1  -3   1 6537.30 156.199   2
   1   3   1 6198.71 164.694   8
  -1  -3   1 6422.74 166.360   8
   1  -3  -1 6239.60 163.343   1
   1  -3  -1 6485.60 156.036   8
  -1   3  -1 5762.78 162.484   1
  -1  -3   1 6085.31 159.562   9
  -1   3  -1 6233.00 158.316   2
   1   3   1 5866.85 161.062   8
  -1   3  -1 6273.19 155.302   6
   1  -3  -1 6235.51 160.275   9
   1   3   1 6062.87 159.107   5
  -1  -3   1 6352.56 155.802   2
  -1   3  -1 6453.57 156.171  10
   1  -3  -1 6018.33 155.482   7
  -1   3  -1 6081.93 156.700   7
   2  -3   1 0.44149 0.72105   1
   2  -3   1 0.36460 0.62906   8
  -2  -3  -1 0.82782 0.42172   4
  -2  -3  -1 0.27675 0.45471   9
   2   3  -1 0.09383 0.21879   2
  -2   3   1 0.51675 0.46267   2
   2   3  -1 0.00389 0.52103   5
  -2   3   1 0.33915 0.70556   9
  -2  -3  -1 0.32523 0.56714   5
   2  -3   1 0.53346 0.48282   2
   2  -3   1 -0.0038 0.62122   9
   2  -3   1 0.39045 0.39698  10
   2  -3   1 -0.0291 0.34631   5
  -2  -3  -1 0.07246 0.44435   9
  -2  -3  -1 0.16889 0.70876   8
   2   3  -1 0.04171 0.43571   1
   2   3  -1 0.14230 0.77526   8
  -2  -3  -1 0.17984 0.39646   1
  -2   3   1 0.18893 0.36099   7
   2  -3   1 0.11571 0.49255   2
  -2   3   1 0.82442 0.74864   1
   2  -3   1 0.05030 0.50219   4
  -2   3   1 0.06932 0.34721  10
  -2   3   1 0.12693 0.42364   8
   2   3  -1 0.02125 0.51557   9
   2   3  -1 0.26665 0.23684   2
  -2  -3  -1 0.28018 0.76614   8
  -2  -3   1 0.20246 0.16819  10
  -2  -3   1 0.24249 0.26819   7
  -2   3  -1 0.31580 0.38168   5
   2  -3  -1 0.26562 0.71977   1
   2   3   1 0.05422 0.29776   4
   2  -3  -1 0.66580 0.67156   9
  -2   3  -1 0.20175 0.77556   9
  -2  -3   1 0.00362 0.25353   7
   2   3   1 -0.2148 0.49088   5
  -2   3  -1 -0.6346 0.35961   7
  -2   3  -1 0.20196 0.59257   8
   2  -3  -1 0.12468 0.31829  10
  -2   3  -1 0.08488 0.47809   2
  -2  -3   1 -0.1440 0.30335   2
  -2  -3   1 0.21922 0.49851   9
  -2  -3   1 0.28139 0.45526   1
   2  -3  -1 0.52228 0.46400   2
  -2   3  -1 0.16101 0.69422   1
  -2   3  -1 -0.0144 0.34902  10
  -2  -3   1 -0.1577 0.54297   9
   2  -3  -1 -0.0005 0.36786   5
  -2   3  -1 0.24644 0.50483   4
  -2  -3   1 0.33237 0.19931  10
   2  -3  -1 0.48598 0.45398   8
   2   3   1 0.08759 0.37830   1
  -2  -3   1 0.13522 0.43245   5
   2  -3  -1 0.29174 0.41556   2
  -2   3  -1 0.76709 0.76698   9
   2   3   1 0.56856 0.76893   8
   2   3   1 1.06344 0.82157   8
   2  -3  -1 0.43885 0.55393   4
  -2  -3   1 0.04911 0.36661   2
  -2  -3   1 0.12236 0.75900   8
   3   3  -1 1156.79 28.7167   2
  -3   3   1 1140.09 30.7818   1
   3   3  -1 1185.28 28.8480   1
   3  -3   1 1136.40 29.0183  10
   3  -3   1 1073.85 30.6390   1
   3  -3   1 1139.42 31.1559   9
  -3  -3  -1 1144.28 28.9080   2
  -3  -3  -1 1123.85 29.5977   4
  -3   3   1 1086.16 29.1637   7
  -3   3   1 1131.66 30.1994   8
  -3  -3  -1 1125.20 32.3336   8
   3  -3   1 1119.80 30.3194   4
  -3   3   1 1134.37 29.7453   2
   3  -3   1 1176.37 29.7978   2
  -3  -3  -1 1147.45 32.0075   8
   3  -3   1 1120.54 29.5340   5
   3   3  -1 1124.50 29.7271   4
  -3  -3  -1 1158.55 28.9000   2
   3   3  -1 1143.92 30.1660   5
   3   3  -1 1117.53 32.1129   8
  -3   3   1 1123.50 30.1092   8
  -3  -3  -1 1093.97 30.0851   5
  -3   3   1 1111.87 31.1132   9
  -3   3   1 1148.42 29.1050  10
  -3   3   1 1166.13 29.6385   5
  -3  -3  -1 1160.53 30.1247   9
   3   3  -1 1158.14 30.1982   9
  -3  -3  -1 1145.61 30.0173   9
   3  -3   1 1144.68 30.7883   8
   3  -3  -1 1179.79 30.1164   8
  -3  -3   1 1167.58 32.3745   8
  -3  -3   1 1189.04 30.6109   9
  -3  -3   1 1170.77 29.2369   2
  -3  -3   1 1061.74 28.6341  10
   3  -3  -1 1160.36 30.8830   1
  -3   3  -1 1172.46 29.1873  10
   3  -3  -1 1160.87 29.7383   2
   3  -3  -1 1141.77 30.3019   4
  -3  -3   1 1075.27 28.7834   1
   3   3   1 1159.83 29.3908   4
   3  -3  -1 1166.45 29.5921   5
  -3  -3   1 1164.90 28.7952   7
  -3   3  -1 1165.46 31.0359   8
  -3   3  -1 1155.70 30.3432   4
   3   3   1 1164.92 32.0824   8
  -3  -3   1 1164.68 29.3671   2
  -3   3  -1 1165.34 30.8300   1
   3  -3  -1 1192.66 31.0691   9
  -3   3  -1 1156.26 29.2660   7
  -3  -3   1 1161.31 30.4010   9
  -3  -3   1 1168.62 31.9248   8
  -3   3  -1 1188.21 29.5719   5
  -3   3  -1 1175.84 29.9319   2
  -3   3  -1 1157.87 31.3870   9
   3  -3  -1 1179.13 29.0465  10
   3   3   1 1184.32 30.3130   5
  -4   3   1 -0.1323 0.85923   8
   4  -3   1 0.19069 0.70460  10
  -4   3   1 -0.0639 0.65603   7
  -4   3   1 0.51304 0.64196  10
  -4  -3  -1 0.16626 0.83366   9
   4  -3   1 -0.9108 0.77035   2
  -4  -3  -1 -0.4579 0.57455   7
   4  -3   1 0.15035 0.77421   5
  -4   3   1 0.17911 0.89468   8
  -4  -3  -1 -0.3640 0.57683   2
   4   3  -1 0.32457 0.77542   4
  -4  -3  -1 -0.0929 0.82956   9
   4  -3   1 0.41832 0.94974   4
  -4   3   1 0.41843 0.81981   2
   4   3  -1 0.86290 0.99664   5
  -4  -3  -1 0.40726 0.91549   5
   4  -3   1 0.97234 1.10807   8
  -4   3   1 -0.3856 1.02233   9
  -4  -3  -1 0.00114 0.59411   2
   4   3  -1 0.41881 1.21788   8
  -4   3   1 -0.2617 0.70629   5
  -4  -3  -1 0.33590 0.44250  10
  -4  -3  -1 -0.0148 1.22233   8
  -4  -3  -1 0.18203 1.08841   8
   4   3  -1 -0.1009 0.46312   9
   4   3  -1 0.36888 0.55122   2
  -4   3   1 0.12974 0.90035   1
   4  -3   1 1.21642 1.22607   9
   4  -3  -1 -0.1025 0.73088   2
   4  -3  -1 0.10645 0.90541   4
  -4  -3   1 0.48375 0.54368  10
  -4   3  -1 0.23331 1.00735   8
  -4   3  -1 -0.2547 0.72135   7
  -4   3  -1 0.12553 0.96831   1
   4   3   1 0.11776 0.65031   4
  -4  -3   1 0.73871 0.89019   5
  -4  -3   1 0.05997 0.60340   2
   4  -3  -1 0.22642 0.66070  10
  -4  -3   1 -0.5177 1.03078   8
  -4   3  -1 0.23309 0.87061   4
   4  -3  -1 0.03108 0.85330   8
   4   3   1 0.19801 0.88733   5
   4  -3  -1 0.32346 1.20947   9
  -4   3  -1 0.83845 0.65511  10
  -4   3  -1 0.63993 0.81969   2
   4  -3  -1 0.33835 0.77145   5
  -4  -3   1 0.40969 0.71404   2
  -4  -3   1 -0.3614 1.16063   8
  -4   3  -1 0.36089 1.11096   9
  -4   3  -1 0.17190 0.76505   5
  -4  -3   1 0.91118 1.03958   9
   4   3   1 -0.3740 1.12254   8
  -4  -3   1 -0.9477 0.54057   7
   5   3  -1 286.579 9.97105   4
  -5   3   1 296.508 9.96562   5
   5  -3   1 288.401 9.90491   5
  -5   3   1 283.383 10.3508   1
   5   3  -1 288.615 11.2642   5
  -5   3   1 286.852 10.9489   8
  -5  -3  -1 285.103 12.5987   8
  -5  -3  -1 279.275 8.70067   7
  -5  -3  -1 294.313 10.4136   5
  -5   3   1 285.725 11.6359   9
  -5  -3  -1 285.632 9.25689   2
   5  -3   1 284.250 10.5091   4
  -5  -3  -1 295.953 10.8718   9
   5  -3   1 295.603 11.3058   8
  -5   3   1 292.174 9.09053  10
  -5   3   1 287.096 9.21346   7
   5  -3   1 280.767 8.74397  10
  -5   3   1 298.811 11.2245   8
  -5   3   1 288.557 9.90450   2
   5  -3   1 285.277 11.4439   9
   5  -3   1 301.530 9.85197   2
  -5  -3  -1 270.249 8.51504  10
  -5  -3  -1 286.422 9.31465   2
   5  -3  -1 324.361 10.1468   5
   5  -3  -1 321.259 9.98528   2
  -5  -3   1 341.634 11.5115   9
  -5   3  -1 324.229 9.41419   7
   5  -3  -1 334.026 11.2737   8
   5  -3  -1 318.164 10.7973   4
  -5  -3   1 335.656 9.83271   2
   5   3   1 313.579 9.90312   4
  -5  -3   1 319.769 12.9424   8
  -5   3  -1 311.844 11.7013   8
  -5   3  -1 325.402 10.8368   4
  -5   3  -1 314.087 10.5801   1
  -5   3  -1 320.413 12.0746   9
  -5  -3   1 332.296 9.09197   7
   5   3   1 336.506 11.8072   5
  -5   3  -1 308.075 10.1046   2
  -5   3  -1 326.455 9.28737  10
  -5   3  -1 320.895 10.0563   5
   5   3   1 321.427 12.6770   8
   5  -3  -1 324.082 11.7433   9
  -5  -3   1 337.959 8.99643  10
  -5  -3   1 311.269 10.5362   5
   6  -3   1 0.82253 1.21186   5
  -6   3   1 -0.0541 1.57233   9
  -6  -3  -1 -0.2238 0.82743   7
  -6  -3  -1 -0.8119 1.43306   8
   6  -3   1 0.71542 1.20271   4
  -6  -3  -1 -0.3969 0.69203  10
  -6   3   1 0.65918 0.90374   7
   6  -3   1 -1.2481 1.10724   9
  -6   3   1 0.03536 0.97621   5
  -6   3   1 -0.0974 0.97474   2
  -6  -3  -1 0.04711 0.78126   2
   6   3  -1 -0.3964 0.65474   2
  -6   3   1 -0.1630 1.24235   8
  -6  -3  -1 0.25259 1.35989   9
  -6   3   1 0.35499 1.03854   1
  -6  -3  -1 0.41604 1.14999   5
  -6   3   1 0.03901 0.75749  10
   6  -3   1 0.09252 1.35251   8
   6  -3   1 -0.1151 0.94718   2
  -6   3   1 0.47543 1.36001   8
   6  -3   1 -0.2085 0.65777  10
   6   3   1 -1.1261 1.48685   8
  -6   3  -1 -0.2655 1.34927   9
  -6  -3   1 -0.6678 1.10650   5
   6  -3  -1 -0.2891 0.87703   2
  -6  -3   1 0.68388 1.31828   9
  -6  -3   1 -0.1359 0.75474  10
  -6   3  -1 -0.4761 0.72682  10
   6  -3  -1 0.08609 1.18410   8
  -6  -3   1 0.01359 0.84154   2
  -6   3  -1 -0.2111 1.34552   8
  -6   3  -1 0.23502 0.96265   2
  -6   3  -1 -0.1038 1.34005   8
  -6   3  -1 -0.6462 0.77521   7
  -6  -3   1 0.54780 1.67817   8
   6  -3  -1 0.32757 0.79773  10
   6  -3  -1 0.53667 1.41288   9
   6  -3  -1 0.89532 1.19781   4
  -6   3  -1 0.03090 1.03485   1
  -6  -3   1 0.17558 0.82700   7
  -6   3  -1 0.30192 1.07457   5
  -7  -3  -1 282.818 13.5190   8
  -7  -3  -1 274.401 8.46238  10
  -7  -3  -1 291.782 11.7837   9
  -7   3   1 262.884 8.94819   7
  -7   3   1 288.557 10.0120   1
   7  -3   1 286.679 11.9449   8
  -7  -3  -1 278.093 10.5439   5
  -7   3   1 270.823 8.78282  10
  -7   3   1 288.583 12.0297   8
  -7   3   1 273.653 9.93329   2
  -7  -3  -1 267.839 8.59595   7
   7  -3   1 256.628 7.91710  10
  -7  -3  -1 271.756 9.39337   2
  -7   3   1 267.395 10.0180   5
  -7   3   1 289.917 12.5759   9
  -7  -3   1 244.067 8.41059  10
  -7   3  -1 272.781 12.1445   8
  -7  -3   1 248.927 12.8404   8
  -7   3  -1 248.314 11.9787   9
  -7  -3   1 245.450 9.29495   2
  -7   3  -1 247.505 8.63866  10
  -7  -3   1 238.370 8.53300   7
  -7   3  -1 245.820 9.67329   5
  -7   3  -1 246.297 9.71758   2
  -7   3  -1 240.251 8.75924   7
   7  -3  -1 238.181 9.26784   2
   7  -3  -1 238.551 7.99754  10
   7  -3  -1 242.865 11.6687   9
  -7  -3   1 239.948 10.1744   5
  -7  -3   1 263.490 11.5235   9
  -7   3  -1 250.187 9.53489   1
  -8   3   1 -0.6843 1.97349   9
  -8  -3  -1 -0.8567 2.25643   8
  -8   3   1 -0.3565 1.18646   7
  -8   3   1 0.25295 1.11741  10
  -8   3   1 1.32173 1.67475   5
  -8   3   1 -1.4203 1.62879   8
  -8  -3  -1 -0.8655 1.24145   2
  -8  -3  -1 0.05633 1.84700   9
  -8   3   1 -0.3445 1.32470   2
  -8  -3  -1 -0.1413 1.04249  10
  -8  -3  -1 -0.8393 1.19418   7
  -8  -3  -1 0.43557 1.67434   5
   8  -3   1 -0.2406 1.63872   8
  -8   3  -1 -1.0487 1.36465   5
  -8   3  -1 0.27543 1.41198   2
  -8  -3   1 0.31348 1.52237   5
  -8  -3   1 -0.1787 1.16472   7
   8  -3  -1 -0.0063 0.92500  10
  -8  -3   1 0.52006 2.25972   8
  -8   3  -1 0.23885 2.08751   9
  -8   3  -1 -0.2447 1.01238  10
  -8  -3   1 0.50470 1.08857  10
  -8   3  -1 -0.2111 1.20421   7
  -8  -3   1 -0.4015 1.20913   2
  -8   3  -1 -1.1456 1.69354   8
  -8  -3   1 0.79050 2.00506   9
  -9  -3  -1 135.281 10.3851   8
  -9   3   1 126.753 7.39311   5
  -9   3   1 134.633 11.8256   8
  -9   3   1 131.106 6.37446   7
  -9   3   1 137.557 6.18290  10
  -9  -3  -1 142.107 6.08189  10
  -9  -3  -1 143.776 9.36558   9
  -9   3   1 136.923 9.63371   9
  -9  -3  -1 141.165 6.29191   7
  -9   3   1 133.540 7.34567   2
  -9  -3  -1 137.899 7.03714   2
   9  -3   1 133.780 9.06734   8
  -9  -3   1 138.806 7.11908   2
  -9  -3   1 134.668 6.27564   7
  -9  -3   1 138.444 6.11673  10
  -9  -3   1 146.145 10.5698   8
  -9   3  -1 134.565 9.71761   9
  -9   3  -1 137.259 9.60474   8
  -9   3  -1 134.714 7.45678   5
  -9   3  -1 127.259 6.06874  10
  -9   3  -1 146.448 6.54786   7
  -9  -3   1 146.460 9.39966   9
  -9   3  -1 137.924 7.45517   2
 -10  -3  -1 -0.1508 1.48737   7
 -10  -3  -1 1.34621 3.14384   8
 -10   3   1 0.84701 1.45779  10
 -10  -3  -1 0.30353 1.41682  10
 -10   3   1 1.03994 1.67688   7
 -10   3   1 1.81840 1.97835   2
 -10  -3  -1 0.24559 1.66655   2
 -10  -3  -1 1.84006 2.47012   9
 -10  -3   1 -2.6612 1.85980   9
 -10   3  -1 0.50186 1.91810   2
 -10   3  -1 -0.9150 2.64288   9
 -10  -3   1 -1.6878 1.50315   2
 -10  -3   1 -0.0403 1.52745   7
 -10  -3   1 -0.0954 2.76863   8
 -10   3  -1 -0.7859 1.32615  10
 -10   3  -1 -0.5002 1.49287   7
 -10  -3   1 0.54718 1.47950  10
 -11  -3  -1 127.270 6.72426   7
 -11   3   1 127.661 6.48379  10
 -11  -3  -1 122.441 7.60405   2
 -11  -3  -1 129.934 6.49328  10
 -11   3   1 133.983 6.98995   7
 -11  -3  -1 129.236 10.2911   9
 -11  -3   1 116.012 7.51197   2
 -11  -3   1 116.730 9.92426   9
 -11   3  -1 112.977 6.55933   7
 -11   3  -1 114.004 6.32812  10
 -11  -3   1 117.716 6.66406   7
 -11  -3   1 119.553 6.37503  10
   0  -4   1 23.4606 1.69407   9
   0  -4  -1 23.0324 1.74246   3
   0  -4  -1 27.1413 1.05071   4
   0  -4   1 25.1000 1.66443   9
   0  -4  -1 26.2648 1.75189   8
   0  -4   1 24.0084 1.43700   4
   0   4   1 23.5561 2.05598   1
   0   4   1 23.1304 1.67750   8
   0   4  -1 25.3496 2.11312   1
   0  -4  -1 25.1025 1.99476   1
   0   4  -1 25.5817 1.38623   4
   0   4  -1 22.9467 1.62474   9
   0  -4   1 23.0406 2.00152   8
   0  -4   1 29.1976 1.14749   2
   0   4  -1 23.4734 1.03192   5
   0  -4  -1 25.3773 1.17246   9
   0  -4   1 25.0114 2.08883   1
   0   4  -1 24.9449 1.10701   6
   0  -4   1 24.2995 1.12378   2
   0   4  -1 22.6977 1.91053   8
   0  -4  -1 22.5643 1.26348   9
   0   4   1 23.0518 1.79142   3
   0  -4  -1 24.1057 1.17860   5
   1  -4   1 56.9008 2.54317   4
   1  -4   1 57.4626 2.94576   8
  -1   4   1 66.7145 2.83587   9
  -1   4   1 52.4614 2.09333   8
   1  -4   1 49.8014 1.94358   7
   1  -4   1 60.8935 2.42398   2
  -1  -4  -1 66.3467 3.41804   8
  -1  -4  -1 46.4328 2.63755   1
   1   4  -1 61.8819 3.43628   8
  -1   4   1 54.5878 3.22597   1
   1  -4   1 54.3415 1.86941  10
   1   4  -1 58.7790 2.32361   5
  -1  -4  -1 61.1946 2.40379   5
  -1   4   1 61.9713 1.72404   2
   1  -4   1 62.3144 2.44274   2
   1   4   1 56.2061 2.83643   1
   1  -4  -1 53.8908 2.13507   8
   1  -4  -1 49.5374 2.47748   9
  -1   4  -1 56.2754 2.27404   2
   1  -4  -1 66.3029 2.46588   4
  -1   4  -1 51.7578 1.78827  10
   1   4   1 61.8169 2.44182   5
  -1  -4   1 56.6463 3.37378   8
  -1  -4   1 50.2309 2.79208   1
  -1   4  -1 55.9154 1.84280   7
   1  -4  -1 45.5986 2.99483   1
  -1  -4   1 55.5627 2.29767   5
  -1   4  -1 51.9474 2.82972   8
  -1   4  -1 61.6740 1.65379   5
   1  -4  -1 56.8140 2.11453   2
  -1   4  -1 56.7861 2.48594   4
  -1   4  -1 63.0010 3.08858   9
   1  -4  -1 58.6247 1.99386   2
  -1   4  -1 54.5044 1.92481   7
   1  -4  -1 66.6274 2.84674   9
   1  -4  -1 60.6683 1.68870   7
  -1  -4   1 55.3370 1.71370   2
  -1   4  -1 60.1237 1.75222   6
   2   4  -1 3994.16 97.9566   1
  -2   4   1 3629.69 94.6428   7
   2   4  -1 3602.25 95.7830   8
  -2  -4  -1 4082.82 95.6519   1
   2  -4   1 3854.01 95.0354   2
  -2  -4  -1 3535.57 95.7563   8
  -2   4   1 3856.00 94.2148   2
  -2   4   1 3572.20 94.7811   8
  -2  -4  -1 3819.20 95.9258   9
   2  -4   1 3997.33 97.0328   9
  -2  -4  -1 3948.77 95.8813   9
   2  -4   1 3689.72 94.1492   5
   2  -4   1 3640.19 97.7352   8
  -2  -4  -1 3777.68 95.6462   8
  -2   4   1 3621.18 94.6706   9
  -2  -4  -1 3701.37 96.2217   5
   2  -4   1 3730.85 95.1709  10
   2   4  -1 3769.92 93.8636   5
   2  -4   1 3789.58 97.0110   4
  -2   4   1 3768.55 95.2484   1
   2  -4   1 3783.91 93.7280   2
  -2   4   1 3896.12 93.8786  10
  -2  -4  -1 3606.19 94.7518   4
   2  -4  -1 3744.03 95.3282   8
   2  -4  -1 3830.69 94.6314   5
  -2  -4   1 3973.83 97.4711   1
   2   4   1 3735.24 96.3637   1
  -2   4  -1 3921.69 94.3196  10
  -2   4  -1 3931.68 99.7170   1
   2   4   1 3709.94 95.8098   8
  -2   4  -1 3697.26 94.9320   9
   2   4   1 3687.06 95.5997   8
  -2  -4   1 3477.40 93.7546   5
  -2   4  -1 3771.03 94.5302   8
   2   4   1 3758.50 95.2578   5
   2  -4  -1 3829.34 96.0493   9
  -2  -4   1 3660.64 95.9499   8
  -2   4  -1 3663.62 94.9443   5
  -2   4  -1 3831.28 96.8194   4
  -2  -4   1 3976.05 94.3280   9
  -2  -4   1 3840.95 94.6609   2
   2  -4  -1 3738.87 96.4162   2
  -2   4  -1 3792.39 95.2201   7
   2  -4  -1 3777.00 93.5581   2
   2  -4  -1 3926.77 94.8651  10
  -2   4  -1 3671.67 93.7377   2
   2  -4  -1 3723.84 97.7604   4
  -2  -4   1 3998.03 94.1971   2
  -2  -4   1 3755.05 93.9223   9
   3  -4   1 65.1259 2.66930  10
  -3   4   1 66.5075 2.93233   5
  -3   4   1 74.9437 4.16634   1
   3  -4   1 76.5175 3.01516   5
  -3  -4  -1 72.4902 3.31195   9
  -3   4   1 66.8064 2.66020  10
   3   4  -1 77.1643 3.58487   5
   3  -4   1 74.9520 3.68298   4
  -3   4   1 72.1741 2.79914   7
  -3   4   1 83.6562 3.50695   8
  -3  -4  -1 60.2708 2.26653   2
  -3  -4  -1 75.8646 3.57163   5
  -3  -4  -1 83.5028 3.52097   9
  -3   4   1 74.9276 3.29112   2
  -3   4  -1 69.5420 2.88675   5
  -3   4  -1 76.9271 3.45044   2
  -3  -4   1 89.1114 4.88835   8
  -3  -4   1 86.6663 3.73955   9
   3  -4  -1 75.1110 3.66184   4
  -3  -4   1 61.3409 2.24851   7
  -3  -4   1 65.9764 2.78369   1
  -3  -4   1 70.1206 2.83497   2
  -3  -4   1 71.6977 3.69471   9
  -3   4  -1 81.1022 4.06028   8
   3  -4  -1 68.5143 2.92187   5
   3   4   1 73.0032 2.74942   4
  -3  -4   1 75.3409 4.84450   8
  -3   4  -1 67.5678 2.79901   7
   3  -4  -1 70.0248 2.66396  10
  -3   4  -1 57.9235 3.82335   1
  -3   4  -1 64.8062 2.73192  10
  -3  -4   1 61.5040 2.62349   2
  -3   4  -1 83.0079 3.76956   4
  -3   4  -1 84.1533 4.52357   9
   3  -4  -1 59.0903 3.77374   9
  -3  -4   1 67.7327 2.18860  10
  -3  -4   1 75.2272 3.54790   5
   3  -4  -1 63.4076 3.08974   2
  -4   4   1 589.482 16.1851   5
  -4  -4  -1 562.152 16.8519   9
  -4  -4  -1 583.076 15.4060   2
  -4  -4  -1 554.843 18.8935   8
  -4  -4  -1 568.675 14.6972   7
  -4   4   1 586.607 17.6383   1
   4  -4   1 578.552 15.4558  10
  -4   4   1 556.025 16.8748   8
   4  -4   1 552.743 17.0074   4
  -4  -4  -1 574.177 19.4563   8
  -4   4   1 575.738 15.6728   7
   4  -4   1 568.503 17.4446   8
   4   4  -1 566.391 16.8790   5
   4  -4   1 572.583 16.1035   5
  -4   4   1 562.453 18.0432   9
   4   4  -1 562.421 16.1886   4
  -4   4   1 586.779 15.5344  10
  -4   4   1 571.273 16.3836   2
   4  -4   1 603.212 18.2722   9
  -4   4   1 553.700 16.8345   8
   4  -4   1 610.249 16.4820   2
  -4  -4  -1 579.438 16.8077   9
   4   4  -1 549.913 19.0463   8
  -4  -4  -1 578.767 16.8962   5
  -4  -4  -1 584.430 15.4868   2
   4  -4  -1 582.253 16.1144   5
  -4  -4   1 568.630 17.2575   9
   4   4   1 565.657 16.9054   5
  -4  -4   1 586.088 19.4960   8
  -4  -4   1 575.304 18.8549   8
   4  -4  -1 581.886 15.4279  10
  -4  -4   1 584.350 17.1494   9
  -4  -4   1 578.120 15.8721   2
  -4   4  -1 597.455 16.6232   2
  -4   4  -1 586.476 16.0674   5
  -4   4  -1 588.112 15.6514  10
  -4  -4   1 579.230 15.1576   7
   4   4   1 570.126 15.8275   4
  -4  -4   1 565.909 15.0069  10
   4  -4  -1 579.310 17.0957   4
  -4   4  -1 575.279 18.3713   9
   4  -4  -1 599.614 16.4082   2
   4   4   1 580.279 19.0850   8
  -4   4  -1 562.538 17.6468   8
  -4  -4   1 601.877 15.7472   2
  -4   4  -1 591.652 17.6492   1
   4  -4  -1 616.178 18.1611   9
  -4  -4   1 581.521 16.9220   5
   4  -4  -1 561.787 16.7221   8
  -4   4  -1 574.149 15.7200   7
  -4   4  -1 592.804 17.1587   4
   5  -4   1 4.00967 1.28792   5
   5  -4   1 5.06573 1.08738  10
  -5   4   1 7.24102 1.83179   8
   5  -4   1 2.90181 1.23730   2
   5  -4   1 6.89377 1.78328   4
  -5  -4  -1 2.70005 0.99306   2
   5  -4   1 6.67018 1.87577   8
  -5  -4  -1 4.26796 1.13858   2
  -5  -4  -1 3.90184 0.81947  10
  -5  -4  -1 2.56279 0.96490   7
  -5  -4  -1 5.84892 1.72887   9
   5   4  -1 4.29165 1.26592   4
  -5  -4  -1 6.21432 1.69047   9
   5  -4   1 2.58332 1.53742   9
  -5   4   1 4.04741 1.31426   5
  -5   4   1 5.94175 1.51339   2
  -5   4   1 5.63264 1.76296   1
  -5   4   1 4.55079 1.13316   7
  -5  -4  -1 5.19880 1.57587   5
  -5  -4  -1 5.92709 2.35119   8
  -5   4   1 7.52701 1.90869   8
  -5   4   1 7.00904 2.18673   9
  -5   4   1 4.56827 1.06821  10
  -5   4  -1 5.43102 1.19208   7
  -5  -4   1 7.38881 1.90000   9
   5  -4  -1 5.17670 1.40317   2
  -5  -4   1 5.89792 1.69626   5
   5   4   1 4.49429 2.03120   8
   5  -4  -1 3.74462 1.73043   9
  -5   4  -1 4.23599 1.05378  10
  -5   4  -1 5.59572 1.66166   4
  -5   4  -1 2.63565 1.44976   1
   5  -4  -1 5.37671 1.38565   5
   5   4   1 3.59402 1.15572   4
  -5   4  -1 6.55291 2.32412   9
  -5  -4   1 4.79064 1.24936   2
  -5   4  -1 3.74011 1.64756   8
  -5   4  -1 3.51623 1.32793   2
  -5  -4   1 4.61981 1.01493   7
   5  -4  -1 6.62344 1.86770   4
  -5   4  -1 3.30264 1.19971   5
  -5  -4   1 4.04416 1.13516   2
  -5  -4   1 4.79219 0.98368  10
   5  -4  -1 7.40131 1.78300   8
  -5  -4   1 3.81297 1.92255   8
   5  -4  -1 4.82096 1.08939  10
  -6   4   1 149.852 6.97410   1
  -6  -4  -1 150.771 5.06389  10
   6  -4   1 159.702 6.43048   2
   6  -4   1 153.666 8.15234   9
  -6   4   1 149.818 5.72094   7
  -6  -4  -1 142.510 8.98572   8
  -6   4   1 148.603 7.40638   8
  -6  -4  -1 148.952 7.36465   9
  -6  -4  -1 151.288 6.92389   5
  -6   4   1 144.118 8.08090   9
  -6  -4  -1 154.177 5.85150   2
  -6   4   1 153.792 5.58117  10
  -6  -4  -1 151.158 5.87140   2
   6  -4   1 148.409 7.54187   8
  -6  -4  -1 152.090 5.24140   7
  -6   4   1 154.594 6.45672   5
  -6   4   1 151.508 6.49111   2
   6  -4   1 143.140 6.32923   5
   6  -4   1 153.794 5.25784  10
   6  -4   1 149.016 7.07783   4
  -6   4   1 145.763 7.42070   8
  -6   4  -1 145.288 5.55133  10
  -6  -4   1 149.837 5.27484  10
  -6   4  -1 141.613 5.63106   7
   6  -4  -1 139.286 7.03450   8
  -6  -4   1 142.337 7.34897   9
   6  -4  -1 152.325 6.32755   2
  -6   4  -1 143.170 6.86426   1
   6  -4  -1 143.636 6.30441   5
  -6   4  -1 136.093 7.61613   8
  -6  -4   1 149.191 9.05095   8
  -6  -4   1 148.159 6.94247   5
   6  -4  -1 144.707 5.27296  10
  -6   4  -1 135.301 8.01293   9
   6  -4  -1 144.959 7.85456   9
  -6   4  -1 154.844 6.37189   5
  -6   4  -1 140.371 7.69974   8
   6  -4  -1 134.021 6.84331   4
  -6  -4   1 148.879 5.36160   7
  -6   4  -1 146.614 6.47958   2
  -6  -4   1 146.945 5.99521   2
  -7  -4  -1 19.4025 3.45143   9
  -7   4   1 13.3047 1.94309  10
   7  -4   1 14.1240 1.72982  10
   7  -4   1 14.0718 2.45802   2
  -7   4   1 22.8359 4.30922   9
   7  -4   1 21.9867 3.68353   8
  -7   4   1 18.8997 2.94517   2
  -7   4   1 21.1511 3.61199   8
  -7  -4  -1 21.0515 3.20296   5
  -7  -4  -1 17.9979 4.26785   8
  -7  -4  -1 16.2798 2.08418   7
  -7   4   1 17.9564 2.75341   5
  -7  -4  -1 15.7286 1.92005  10
  -7   4   1 18.6377 2.78936   1
  -7   4   1 19.9794 2.43951   7
  -7  -4  -1 18.3374 2.54929   2
  -7  -4   1 16.7310 3.06036   5
  -7  -4   1 15.6414 2.07116   7
   7  -4  -1 20.6776 3.26400   8
  -7  -4   1 18.4423 2.13199  10
   7  -4  -1 8.39444 2.70667   9
  -7  -4   1 26.9429 4.21825   9
   7  -4  -1 13.1049 1.73300  10
  -7   4  -1 15.1441 2.06230  10
  -7   4  -1 26.1739 4.26435   8
  -7  -4   1 16.3072 2.43669   2
  -7   4  -1 14.6824 2.53462   5
   7  -4  -1 12.1268 2.27619   2
  -7   4  -1 16.8492 2.30043   7
  -7   4  -1 17.5922 2.78962   2
  -7  -4   1 18.2420 4.35280   8
  -7   4  -1 20.0685 4.00677   9
  -7   4  -1 17.3139 2.83792   1
  -8   4   1 42.2041 4.94401   8
  -8  -4  -1 38.6885 4.75110   9
  -8  -4  -1 47.0734 6.32961   8
   8  -4   1 41.6739 2.59847  10
  -8  -4  -1 48.5735 3.77034   2
   8  -4   1 45.5309 5.04321   8
  -8  -4  -1 46.5378 3.20317   7
  -8   4   1 43.1051 3.37416   7
  -8   4   1 48.0248 4.16552   5
  -8   4   1 43.6467 3.99141   2
  -8   4   1 46.2689 3.27275  10
  -8   4   1 41.4116 5.45129   9
  -8  -4  -1 49.3994 4.56080   5
  -8  -4  -1 43.2692 3.01772  10
  -8  -4   1 42.9188 3.74642   2
  -8  -4   1 41.7033 3.09032  10
  -8  -4   1 44.1838 4.41319   5
   8  -4  -1 42.7514 2.76629  10
  -8  -4   1 43.5463 3.20714   7
  -8   4  -1 44.4667 5.70049   9
  -8  -4   1 45.8302 6.03126   8
  -8   4  -1 43.4252 3.26101  10
  -8   4  -1 45.9717 3.45141   7
  -8   4  -1 45.6683 5.26692   8
  -8   4  -1 44.2769 4.08061   2
  -8   4  -1 47.7380 4.09862   5
  -8  -4   1 36.5134 4.75746   9
  -9   4   1 4.54292 5.11553   9
  -9  -4  -1 2.87677 2.52758   9
  -9   4   1 1.58968 1.56650   7
   9  -4   1 2.36145 2.35909   8
  -9  -4  -1 1.20132 1.69656   2
  -9   4   1 2.52166 2.05086   5
  -9   4   1 2.63421 1.56125  10
  -9  -4  -1 1.19429 1.39356  10
  -9  -4  -1 2.63542 3.01857   8
  -9   4   1 1.59819 1.80308   2
  -9  -4  -1 0.86697 1.52582   7
  -9  -4   1 3.57666 1.70864   7
  -9   4  -1 1.79463 1.82589   2
  -9  -4   1 5.69681 2.11991   2
  -9   4  -1 2.48707 1.60443   7
  -9  -4   1 2.29949 2.99463   8
  -9   4  -1 2.51585 1.43924  10
  -9   4  -1 3.70948 2.96432   8
  -9  -4   1 2.67987 2.43368   9
  -9  -4   1 1.29327 1.42540  10
  -9   4  -1 4.53999 2.92422   9
  -9   4  -1 1.61380 1.81773   5
 -10  -4  -1 61.5657 4.37148   7
 -10   4   1 56.2224 4.16880  10
 -10  -4  -1 60.7772 6.86486   9
 -10  -4  -1 62.1410 5.12157   2
 -10  -4  -1 66.0352 4.36823  10
 -10   4   1 56.0964 4.42497   7
 -10  -4   1 67.2117 4.62788   7
 -10  -4   1 58.4574 5.04039   2
 -10   4  -1 64.9041 4.41322  10
 -10  -4   1 61.1320 4.31602  10
 -10  -4   1 76.1402 14.6981   8
 -10  -4   1 64.3028 6.97057   9
 -10   4  -1 63.4812 5.55856   2
 -10   4  -1 67.3909 4.66328   7
 -11  -4  -1 2.29917 1.90100   7
 -11   4   1 1.16864 1.87023   7
 -11  -4  -1 1.97913 2.93390   9
 -11  -4  -1 0.09882 1.63547  10
 -11  -4  -1 0.29750 1.82985   2
 -11   4   1 1.80587 1.67887  10
 -11  -4   1 0.68188 1.70520  10
 -11  -4   1 1.46725 2.83402   9
 -11  -4   1 3.65374 2.02308   7
 -11  -4   1 -0.7363 1.76214   2
 -11   4  -1 1.61698 1.66980  10
 -11   4  -1 0.45516 1.70727   7
   0  -5   1 0.12550 0.56551   9
   0  -5   1 -0.0317 0.56149   9
   0  -5  -1 0.23324 0.47027   9
   0  -5  -1 -0.0796 0.69381   1
   0  -5   1 -0.2020 0.62053   1
   0  -5   1 0.12339 0.45123   4
   0   5   1 0.26665 0.55278   8
   0   5  -1 0.19356 0.48227   3
   0  -5  -1 -0.0771 0.55161   3
   0  -5  -1 -0.0590 0.36601   9
   0   5  -1 -0.1452 0.26013   5
   0  -5   1 -0.3944 0.26882   2
   0   5   1 0.14861 0.67477   1
   0  -5   1 0.03046 0.29784   2
   0  -5  -1 -0.1806 0.55004   8
   0   5  -1 0.00919 0.74369   1
   0  -5  -1 0.36124 0.34549   5
   0   5  -1 0.12633 0.38710   4
   0  -5  -1 -0.1710 0.27861   4
   0   5  -1 0.26707 0.67502   8
   0  -5   1 -0.1418 0.61844   8
   1  -5   1 783.495 20.7491   9
   1   5  -1 764.557 19.7059   5
  -1  -5  -1 763.201 20.5359   3
   1   5  -1 770.819 21.0231   1
   1  -5   1 780.068 20.9400   8
   1   5  -1 767.934 19.5342   4
  -1  -5  -1 798.901 21.3266   8
  -1  -5  -1 762.596 19.7836   5
   1  -5   1 751.395 19.2059   7
  -1  -5  -1 755.541 18.8841   4
   1  -5   1 765.775 20.1379   4
  -1  -5  -1 786.219 19.1406   9
  -1  -5  -1 797.427 19.0750   9
  -1   5   1 775.935 19.8143   8
  -1  -5  -1 781.442 20.9591   1
  -1  -5  -1 765.988 21.5184   8
   1  -5   1 788.313 19.8707   2
   1   5  -1 756.630 21.7009   8
  -1   5   1 774.393 21.6862   1
   1  -5   1 796.424 19.6415   2
   1  -5   1 777.816 19.0822  10
   1  -5  -1 735.580 19.7859   4
  -1   5  -1 737.493 18.8202   7
   1  -5  -1 769.321 20.2251   9
  -1  -5   1 741.577 20.0920   9
   1  -5  -1 724.204 20.3473   9
  -1   5  -1 742.356 20.8101   9
  -1   5  -1 742.955 19.9706   4
  -1   5  -1 762.270 21.6821   1
  -1  -5   1 743.893 19.6909   5
  -1  -5   1 754.829 21.8292   8
  -1   5  -1 742.947 20.8226   8
  -1   5  -1 758.242 18.8749   6
   1  -5  -1 733.741 20.4047   9
  -1  -5   1 765.912 18.8478   2
  -1  -5   1 759.260 18.8316   2
   1   5   1 708.001 21.2831   8
   1  -5  -1 758.822 19.8406   8
  -1  -5   1 771.405 20.3198   9
   1   5   1 742.430 20.9065   1
   1  -5  -1 748.874 19.2000   2
   1   5   1 731.011 19.7862   5
   1  -5  -1 752.783 19.3734   2
  -1  -5   1 755.977 20.9588   1
  -1  -5   1 733.697 19.3314   3
   2  -5   1 0.15433 0.42863  10
   2  -5   1 1.55502 0.87041   8
   2  -5   1 0.62098 0.38880   5
  -2  -5  -1 0.97792 0.70457   1
   2  -5   1 1.20987 0.68938   2
   2   5  -1 1.37834 0.69580   5
   2  -5   1 1.05791 0.64203   2
   2   5  -1 1.13410 0.96347   8
   2  -5   1 0.54977 0.66174   4
   2  -5   1 0.87679 0.93507   9
   2   5  -1 0.53563 0.66709   1
  -2  -5  -1 0.17205 0.48610   9
  -2  -5  -1 1.52947 0.73381   5
  -2  -5   1 0.37230 0.72185   1
  -2   5  -1 0.56255 0.75161   8
  -2  -5   1 0.49488 0.66985   9
  -2  -5   1 0.55917 0.34787   2
  -2  -5   1 1.15466 1.02645   8
  -2   5  -1 0.94834 0.40150   6
  -2   5  -1 0.21944 0.41841  10
  -2   5  -1 0.33046 0.34400   5
  -2   5  -1 1.04049 0.68662   4
  -2   5  -1 0.80298 0.46266   7
  -2   5  -1 0.98509 0.68929   2
  -2   5  -1 1.13168 0.65975   2
  -2  -5   1 0.30421 0.30676   2
  -2   5  -1 0.82816 1.01453   1
  -2   5  -1 1.16506 1.05737   9
  -2  -5   1 1.05929 0.66808   9
   2  -5  -1 2.89991 0.67923   2
  -2  -5   1 1.52735 0.66738   5
   3   5  -1 4197.64 112.676   8
  -3  -5  -1 4484.44 111.456   9
  -3  -5  -1 4578.63 112.777   8
  -3   5   1 4396.16 110.636   8
   3  -5   1 4293.60 111.440  10
  -3   5   1 4466.01 109.278  10
  -3  -5  -1 4484.63 112.189   9
   3   5  -1 4444.92 112.058   1
   3  -5   1 4421.98 111.604   9
  -3  -5  -1 4459.11 110.563   1
   3  -5   1 4462.72 113.739   8
  -3   5   1 4293.85 109.728   2
   3  -5   1 4427.27 112.284   2
  -3   5   1 4195.26 109.881   7
   3  -5   1 4323.69 109.702   5
  -3  -5  -1 4180.22 112.845   8
   3   5  -1 4379.50 110.209   5
  -3   5   1 4441.63 111.841   1
  -3  -5  -1 4385.95 110.217   5
   3  -5   1 4371.29 110.535   4
  -3   5   1 4419.79 111.567   9
  -3   5  -1 4384.15 110.892   8
  -3  -5   1 4625.05 108.680   7
   3   5   1 4389.12 110.301   5
  -3  -5   1 4242.11 110.160   9
   3  -5  -1 4485.93 112.513   8
   3  -5  -1 4482.26 112.022   5
  -3   5  -1 4433.09 111.012   5
  -3  -5   1 4391.28 112.467   8
  -3   5  -1 4482.10 110.072   2
  -3  -5   1 4404.06 109.212   2
  -3  -5   1 4275.97 110.019   2
  -3  -5   1 4409.79 113.226   8
  -3   5  -1 4481.42 111.846   9
  -3   5  -1 4499.85 109.695  10
  -3   5  -1 4361.08 111.735   1
  -3  -5   1 4690.68 111.164   1
   3  -5  -1 4619.02 111.421   9
   3  -5  -1 4529.78 110.983   2
   3  -5  -1 4365.21 111.248  10
   3   5   1 4458.53 109.940   4
   3   5   1 4359.54 111.470   1
   3  -5  -1 4396.78 110.440   4
  -3   5  -1 4534.16 111.981   9
  -3   5  -1 4301.71 111.527   7
  -3  -5   1 4384.70 110.231   5
   3   5   1 4455.09 113.044   8
  -3   5  -1 4405.79 110.417   4
  -3  -5   1 4454.36 112.381   9
  -4   5   1 0.25250 0.82962   8
  -4   5   1 0.12453 0.81772   8
  -4   5   1 0.33295 0.63768  10
   4  -5   1 0.45379 0.72781   5
   4  -5   1 0.14874 0.65464  10
  -4   5   1 0.47169 0.72430   5
  -4   5   1 0.09172 0.64874   7
  -4  -5  -1 0.39497 0.50966   1
   4  -5   1 -0.5856 0.78319   4
   4  -5   1 -0.0106 0.96706   8
  -4  -5  -1 -0.4684 1.36996   8
  -4   5   1 0.00753 0.83252   2
  -4   5   1 0.02290 1.13163   9
   4  -5   1 0.15131 0.83796   2
  -4  -5  -1 0.11456 0.85171   9
   4   5  -1 0.04001 0.69451   4
   4   5  -1 0.14946 0.53331   1
  -4  -5  -1 -0.8221 0.80077   5
  -4  -5  -1 -0.2381 0.52646   1
  -4  -5  -1 0.27354 0.57346   2
  -4   5   1 0.01095 1.12866   1
   4   5  -1 -0.2207 0.93711   5
   4  -5   1 0.35411 1.25317   9
  -4  -5  -1 -0.0512 0.55127   2
  -4  -5  -1 0.29511 0.85601   9
  -4  -5  -1 0.29814 1.71958   8
   4   5  -1 -0.3526 1.42868   8
  -4   5  -1 0.46181 1.05034   8
  -4   5  -1 0.57404 0.70912   5
  -4  -5   1 0.01784 0.47248  10
  -4  -5   1 -0.2083 1.29508   8
  -4   5  -1 0.22934 0.91193   2
   4  -5  -1 0.25075 0.64746  10
   4  -5  -1 0.19208 0.70368   5
   4  -5  -1 0.87128 1.13083   4
   4   5   1 0.22078 0.58951   4
  -4  -5   1 0.78973 1.39957   8
   4   5   1 0.37240 1.01248   5
  -4   5  -1 0.70512 0.71950   7
  -4   5  -1 0.64854 1.17067   1
   4  -5  -1 0.29609 1.16256   9
   4  -5  -1 -0.4682 0.75193   2
  -4  -5   1 -0.0828 0.57602   2
  -4  -5   1 -0.9424 0.54024   7
  -4  -5   1 0.16082 0.83376   9
  -4  -5   1 0.11157 0.65648   2
  -4  -5   1 0.66181 0.96681   5
  -4  -5   1 0.49442 0.59668   1
  -4  -5   1 1.22354 1.02784   9
  -4   5  -1 0.18519 0.93281   4
   4  -5  -1 -0.4094 0.74568   8
  -4   5  -1 0.15316 0.64863  10
  -4   5  -1 0.55633 1.42166   9
  -5  -5  -1 560.082 20.0620   8
   5  -5   1 507.303 18.0542   9
  -5   5   1 553.992 16.3242   2
   5  -5   1 532.747 17.0290   4
  -5   5   1 549.380 17.6032   1
  -5  -5  -1 532.182 16.8455   9
  -5  -5  -1 550.107 15.2681   2
   5  -5   1 559.988 15.0729  10
  -5   5   1 536.201 15.1339  10
   5  -5   1 551.172 16.1997   2
  -5   5   1 523.103 16.7972   8
   5  -5   1 537.181 17.2903   8
  -5   5   1 543.419 16.9658   8
  -5   5   1 544.842 15.8762   5
  -5  -5  -1 541.649 16.7560   9
  -5   5   1 524.225 18.2343   9
   5   5  -1 541.729 15.9081   4
  -5  -5  -1 557.374 15.1656   2
  -5   5   1 532.103 15.2889   7
   5  -5   1 535.527 15.8495   5
  -5  -5  -1 538.800 16.7619   5
  -5  -5  -1 512.601 14.1469  10
  -5  -5  -1 523.550 14.3621   7
  -5   5  -1 535.466 18.6282   9
  -5   5  -1 576.545 17.7883   1
   5  -5  -1 571.258 16.2597   2
  -5   5  -1 542.734 15.3280   7
  -5   5  -1 551.722 17.0113   4
  -5  -5   1 572.694 14.7189  10
  -5  -5   1 542.838 17.0302   9
   5  -5  -1 550.647 17.0862   4
   5  -5  -1 576.851 18.2800   9
  -5  -5   1 562.528 15.6568   2
  -5  -5   1 573.436 15.4834   2
   5  -5  -1 568.263 15.1190  10
  -5   5  -1 541.546 17.6944   8
  -5   5  -1 559.899 15.8356   5
  -5  -5   1 551.781 16.8308   5
  -5  -5   1 543.433 17.2787   9
   5  -5  -1 550.310 15.8335   5
  -5  -5   1 553.171 19.9345   8
   5  -5  -1 548.653 16.6689   8
  -5  -5   1 557.607 14.7723   7
  -5   5  -1 569.803 15.3509  10
   5   5   1 547.594 15.4786   4
  -5   5  -1 559.274 16.4788   2
  -6  -5  -1 -0.4378 0.83402   2
  -6   5   1 -0.1362 0.81182  10
  -6  -5  -1 -0.1678 0.63819  10
  -6  -5  -1 -0.2332 0.76154   7
  -6  -5  -1 -0.1728 1.71964   8
  -6   5   1 -0.5956 1.13003   8
  -6  -5  -1 0.07200 1.16729   9
  -6   5   1 0.05743 0.86256   7
  -6   5   1 0.34046 1.22231   8
  -6   5   1 0.00386 0.98257   5
  -6   5   1 -0.1415 1.27737   1
  -6  -5  -1 -0.1696 0.81868   2
   6  -5   1 0.18966 1.11604   4
   6  -5   1 1.04870 1.14910   2
  -6   5   1 -0.3998 0.97744   2
   6  -5   1 0.16458 0.84395  10
   6  -5   1 0.12595 1.46435   9
   6  -5   1 0.39619 1.01218   5
  -6  -5  -1 0.88817 1.30851   5
  -6   5   1 0.44567 1.72748   9
   6  -5   1 -0.4764 1.11367   8
  -6  -5   1 -0.3252 0.82576   2
  -6  -5   1 1.00471 1.33638   5
   6  -5  -1 0.10782 1.22638   4
  -6  -5   1 0.39621 1.72951   8
   6  -5  -1 -0.3010 0.95074   5
  -6   5  -1 -0.3575 0.76676  10
  -6   5  -1 -0.3254 1.16438   8
  -6   5  -1 1.26989 1.70397   9
  -6   5  -1 -0.6224 0.95794   5
   6  -5  -1 -0.2106 1.10261   8
   6  -5  -1 -0.2503 1.34511   9
  -6   5  -1 0.32424 1.13139   2
   6  -5  -1 -0.2789 1.00639   2
  -6  -5   1 0.04061 1.17340   9
  -6   5  -1 0.28433 1.29695   1
  -6   5  -1 0.39169 0.91601   7
  -6   5  -1 -0.6268 1.24945   8
   6  -5  -1 -0.1493 0.79663  10
  -6  -5   1 0.04617 0.78064   7
  -6  -5   1 0.43696 0.76189  10
   7  -5   1 196.962 11.4640   9
  -7  -5  -1 204.605 6.99355   7
  -7  -5  -1 194.000 8.87877   5
   7  -5   1 207.239 6.94357  10
  -7   5   1 197.194 7.46107   7
  -7   5   1 199.052 8.24637   5
  -7  -5  -1 190.888 7.62868   2
  -7   5   1 197.789 7.23770  10
   7  -5   1 197.246 9.59960   8
  -7  -5  -1 195.976 9.53782   9
  -7   5   1 188.847 9.52544   8
  -7   5   1 198.306 9.01635   1
  -7   5   1 199.626 8.46578   2
  -7  -5  -1 201.103 6.83581  10
  -7   5   1 190.583 10.4624   9
  -7   5   1 196.709 9.51336   8
  -7  -5  -1 193.493 11.6274   8
   7  -5   1 211.486 8.35174   2
  -7  -5   1 216.485 8.09374   2
  -7  -5   1 212.277 7.11533  10
  -7   5  -1 218.469 9.27720   1
   7  -5  -1 217.260 8.42808   2
  -7   5  -1 212.779 7.60800   7
  -7   5  -1 208.265 7.42881  10
  -7   5  -1 206.520 8.67178   2
  -7   5  -1 212.348 8.33215   5
   7  -5  -1 215.440 10.6007   9
   7  -5  -1 210.527 9.37640   8
  -7  -5   1 205.313 11.7825   8
  -7  -5   1 212.807 9.81405   9
  -7   5  -1 199.187 10.8175   9
  -7   5  -1 211.610 10.1338   8
  -7  -5   1 217.435 9.26839   5
  -7  -5   1 201.891 7.14003   7
  -8  -5  -1 -0.8140 2.15788   8
  -8  -5  -1 -0.5564 1.15915   2
  -8  -5  -1 -0.0563 1.07953  10
  -8   5   1 0.54275 1.48334   2
  -8   5   1 -1.3294 1.33996   5
   8  -5   1 -0.4413 0.97515  10
  -8  -5  -1 -0.4218 1.65411   5
  -8  -5  -1 0.06323 1.82541   9
  -8   5   1 -0.0500 1.23767   7
  -8   5   1 -0.1054 1.05468  10
   8  -5   1 0.30064 1.84620   8
  -8   5   1 -0.4392 1.80573   8
  -8  -5  -1 -0.1755 1.14328   7
  -8   5   1 -0.6172 2.00014   9
  -8  -5   1 0.00167 1.13526  10
  -8  -5   1 -0.9074 2.12071   8
  -8   5  -1 -1.3268 1.34468   5
  -8  -5   1 0.43557 1.16303   7
  -8   5  -1 -0.6418 1.37187   2
  -8   5  -1 0.60414 1.22189  10
  -8   5  -1 0.90995 2.46047   9
   8  -5  -1 0.06335 1.03555  10
  -8   5  -1 0.53689 1.26060   7
  -8  -5   1 0.73330 1.34637   2
  -8  -5   1 -1.2571 1.68664   9
  -8  -5   1 -0.1428 1.55255   5
  -8   5  -1 -0.9816 1.84474   8
  -9  -5  -1 468.957 14.5029   7
  -9  -5  -1 498.734 19.0085   9
  -9  -5  -1 479.107 21.6893   8
  -9  -5  -1 460.900 14.2162  10
  -9   5   1 483.807 17.4398   2
  -9   5   1 475.741 14.6316  10
   9  -5   1 465.572 19.5565   8
  -9   5   1 479.845 15.0099   7
  -9  -5  -1 459.513 15.5747   2
  -9  -5   1 451.256 15.6027   2
  -9  -5   1 455.927 18.5717   9
  -9  -5   1 459.501 21.3067   8
  -9   5  -1 447.811 14.5797  10
  -9   5  -1 437.022 16.2856   2
  -9  -5   1 450.896 14.3000  10
  -9  -5   1 464.043 14.6234   7
  -9   5  -1 446.217 15.9728   5
  -9   5  -1 457.377 14.8236   7
 -10  -5  -1 2.67439 1.69342   7
 -10   5   1 -0.7636 1.26930  10
 -10  -5  -1 -0.6123 1.38048  10
 -10  -5  -1 0.81932 2.41381   9
 -10   5   1 0.66577 1.58099   7
 -10  -5  -1 -0.3053 1.62002   2
 -10  -5   1 0.97467 1.52112  10
 -10  -5   1 1.56496 1.62662   7
 -10   5  -1 -0.2841 1.48281   7
 -10   5  -1 -0.3212 1.34066  10
 -10  -5   1 -0.0515 2.22535   9
 -10  -5   1 -0.2016 1.60426   2
 -11  -5  -1 116.806 6.22218  10
 -11   5   1 117.470 6.28467  10
 -11  -5  -1 127.485 6.62155   7
 -11  -5  -1 109.394 9.47764   9
 -11   5   1 122.917 6.68103   7
 -11  -5  -1 125.104 7.57868   2
 -11  -5   1 121.959 6.65316   7
 -11  -5   1 114.494 9.58419   9
 -11  -5   1 113.180 6.23738  10
 -11   5  -1 113.519 6.29565  10
 -11   5  -1 119.613 6.66628   7
 -11  -5   1 112.886 7.35295   2
   0   6  -1 8.66382 0.95310   4
   0  -6  -1 8.80612 0.82578   4
   0  -6   1 8.75690 0.73477   2
   0  -6   1 9.45376 1.38185   9
   0   6  -1 7.93248 0.70064   5
   0  -6   1 7.81822 1.35457   9
   0  -6  -1 8.89221 1.48426   8
   0  -6  -1 7.27417 1.05726   9
   0  -6   1 8.20615 0.74111   2
   0   6   1 9.34827 1.36811   8
   0  -6   1 6.76289 1.03888   4
   0  -6   1 8.15147 1.63649   8
   0   6   1 7.39475 1.56491   1
   0  -6  -1 8.32418 0.79688   5
   0   6  -1 8.69354 1.79602   1
   0  -6  -1 8.17575 1.32581   3
   0  -6   1 8.17628 0.69333   5
   0  -6  -1 8.65372 0.96954   9
   0   6  -1 7.20755 1.50780   8
  -1   6   1 275.365 8.29413   8
  -1  -6  -1 272.691 7.26068   4
   1  -6   1 261.008 9.12000   8
   1  -6   1 269.676 7.23051  10
  -1  -6  -1 287.988 8.04873   5
   1   6  -1 296.628 10.1136   8
   1  -6   1 269.722 8.02522   2
   1  -6   1 260.244 7.54338   7
  -1   6   1 245.881 9.66206   1
   1   6  -1 261.107 7.63226   4
  -1  -6  -1 293.739 9.87818   8
   1  -6   1 278.118 8.42321   4
   1  -6   1 292.579 9.28402   9
   1   6  -1 281.622 7.94271   5
   1   6   1 280.409 8.07869   5
   1  -6  -1 272.600 7.57765   2
   1   6   1 257.937 9.22130   1
  -1  -6   1 311.443 7.91853   3
  -1   6  -1 251.137 8.98274   8
  -1   6  -1 270.830 7.52452   2
   1  -6  -1 303.777 8.22143   4
  -1  -6   1 268.162 9.98426   8
  -1   6  -1 272.711 7.06126   6
   1  -6  -1 256.433 8.25647   8
   1  -6  -1 276.836 7.41324   2
  -1  -6   1 267.822 7.89458   5
   2  -6   1 86.4278 3.83883   4
  -2   6   1 84.0182 3.02794   2
   2  -6   1 79.1628 3.50632   2
   2  -6   1 80.9081 3.98628   8
   2  -6   1 86.9999 3.40991   2
   2  -6   1 83.7956 2.82172  10
  -2  -6  -1 83.3403 3.19043   9
   2   6  -1 76.8147 4.79607   8
  -2  -6  -1 80.8581 4.90929   8
  -2  -6  -1 79.9877 4.70078   8
   2   6  -1 87.8402 4.10201   1
  -2   6   1 84.6915 3.20979   8
  -2   6   1 84.8256 4.83810   1
  -2  -6  -1 84.5282 3.97134   1
   2  -6   1 94.5871 4.51358   9
   2   6  -1 82.5123 3.51656   5
  -2  -6  -1 78.7296 3.49035   5
  -2  -6  -1 84.5986 3.00163   9
  -2  -6   1 77.9902 2.48515   2
  -2   6  -1 78.5314 3.31565   2
  -2  -6   1 80.5886 3.78137   9
  -2  -6   1 77.1114 3.43396   5
   2  -6  -1 83.9532 4.08259   9
   2   6   1 78.6211 3.89824   1
  -2   6  -1 76.8073 2.65997   7
  -2   6  -1 80.6407 4.38918   9
  -2  -6   1 75.1987 4.91300   8
  -2   6  -1 75.1932 3.56161   4
   2  -6  -1 71.6276 3.48751   4
  -2  -6   1 83.7506 2.45829   2
  -2   6  -1 76.1123 2.36739   6
   2  -6  -1 76.4655 2.63776  10
  -2   6  -1 79.2662 4.00956   8
   2  -6  -1 76.4281 3.08772   8
   2  -6  -1 75.7105 3.27262   2
   2  -6  -1 84.0664 3.18387   2
   2  -6  -1 78.4882 2.58809   5
  -2   6  -1 78.7664 2.44236   5
   2   6   1 73.2121 4.70810   8
  -2   6  -1 76.5385 2.60602  10
  -2   6  -1 76.6591 4.67291   1
   2   6   1 67.5538 3.36135   5
  -2  -6   1 74.6869 3.47170   9
  -3  -6  -1 16.7560 2.08322   5
  -3  -6  -1 10.7662 1.60409   1
  -3   6   1 16.3504 1.66218   8
  -3   6   1 15.8498 2.46324   9
   3  -6   1 19.2960 2.16314   8
  -3  -6  -1 18.0283 1.67093   9
  -3   6   1 19.7575 2.91685   9
  -3  -6  -1 18.9120 3.00353   8
  -3  -6  -1 22.8786 3.07204   8
  -3   6   1 15.5333 1.20868   7
   3   6  -1 18.1361 1.97048   5
   3   6  -1 18.3091 2.89397   8
  -3   6   1 14.2276 1.13136  10
   3  -6   1 14.3250 1.95865   4
  -3   6   1 16.0350 1.72705   2
   3  -6   1 13.7373 1.25478   5
  -3   6   1 14.3783 2.56351   1
   3  -6   1 14.0872 1.79891   2
   3  -6   1 12.6386 2.33076   9
   3   6  -1 11.3006 1.67139   1
  -3  -6  -1 16.4712 1.74152   9
   3  -6   1 17.2212 1.41239  10
  -3   6  -1 15.1953 1.81713   2
  -3   6  -1 14.4022 2.05401   8
   3  -6  -1 17.7617 2.27495   4
  -3  -6   1 18.8644 2.80332   8
   3   6   1 18.6107 2.01937   5
  -3  -6   1 18.0882 1.93810   9
   3  -6  -1 15.6332 1.27321  10
  -3  -6   1 12.5899 1.78608   1
   3  -6  -1 17.9836 1.59534   8
   3  -6  -1 13.2111 1.63894   2
   3   6   1 16.0550 1.75430   1
   3   6   1 22.3870 3.16756   8
   3  -6  -1 14.0320 1.27312   5
  -3   6  -1 20.5855 2.13119   4
  -3  -6   1 15.5775 2.94627   8
  -3  -6   1 13.8926 1.23179   2
  -3  -6   1 14.8727 1.16472   2
   3  -6  -1 11.0194 1.99618   9
  -3   6  -1 16.4435 1.34373   7
  -3   6  -1 14.4611 1.22459   5
  -3   6  -1 16.6809 1.34752  10
  -3  -6   1 14.2349 1.93343   9
  -3   6  -1 15.5762 2.49130   9
  -3   6  -1 10.0738 2.20641   1
  -3  -6   1 16.1509 2.04210   5
   4  -6   1 246.559 10.1032   9
   4  -6   1 247.723 9.14163   4
  -4  -6  -1 248.756 7.18537   2
   4   6  -1 240.307 8.84372   5
   4  -6   1 245.230 9.10099   8
  -4   6   1 240.522 8.40767   2
  -4  -6  -1 250.161 8.56998   9
  -4   6   1 248.426 7.60015   7
  -4   6   1 254.745 10.1533   1
   4  -6   1 257.821 7.66169  10
   4   6  -1 250.616 7.79458   1
   4  -6   1 245.226 7.80216   5
  -4  -6  -1 234.347 7.59835   1
  -4   6   1 231.426 9.96514   9
  -4   6   1 235.976 8.46812   8
  -4  -6  -1 237.060 8.59297   9
  -4   6   1 252.503 7.47432  10
  -4  -6  -1 260.143 7.14035   2
  -4  -6  -1 240.039 11.1706   8
  -4  -6  -1 259.718 8.99127   5
  -4  -6  -1 259.330 7.70094   1
   4   6  -1 238.054 7.84845   4
   4  -6   1 263.496 8.59344   2
  -4   6  -1 254.426 7.70834   7
   4  -6  -1 262.156 9.22448   4
   4  -6  -1 244.889 7.50928  10
   4   6   1 246.277 7.61125   1
  -4  -6   1 244.096 7.75585   1
  -4  -6   1 250.903 6.71769  10
  -4  -6   1 239.872 8.79899   9
  -4   6  -1 256.934 10.4311   9
   4  -6  -1 262.204 8.47331   2
  -4   6  -1 258.828 8.73057   2
  -4  -6   1 259.443 7.80759   2
  -4   6  -1 251.044 9.41835   8
  -4   6  -1 253.066 9.07456   4
  -4  -6   1 260.271 8.98329   5
  -4   6  -1 262.362 10.2742   1
   4   6   1 257.638 7.36856   4
   4  -6  -1 259.412 9.96947   9
  -4   6  -1 264.293 7.72260  10
   4   6   1 259.461 9.06573   5
  -4   6  -1 259.747 7.80149   5
  -4   6  -1 246.581 10.2412   9
   4  -6  -1 251.734 7.83180   5
  -4  -6   1 256.216 9.24470   9
   4  -6  -1 245.057 8.26958   8
  -4  -6   1 247.003 11.3501   8
  -4  -6   1 254.157 7.54787   2
  -5  -6  -1 23.4579 2.92729   5
   5  -6   1 17.8924 1.73586  10
  -5   6   1 20.4936 2.33681   2
   5  -6   1 17.9656 1.92955   5
   5   6  -1 19.5646 2.29410   4
  -5   6   1 17.4603 1.68021  10
  -5  -6  -1 18.6377 2.35506   9
  -5  -6  -1 18.2131 1.69706   2
   5  -6   1 15.7672 2.28898   2
   5  -6   1 10.8924 2.46077   9
  -5  -6  -1 14.7172 1.13930   7
  -5  -6  -1 16.9053 1.59155   2
  -5  -6  -1 28.0816 4.66888   8
  -5   6   1 18.1901 3.19622   9
   5  -6   1 22.1158 2.69274   4
  -5  -6  -1 21.7933 2.53963   9
  -5   6   1 18.9253 1.78389   7
  -5   6   1 18.2715 2.93102   1
  -5   6   1 19.7805 2.45456   8
  -5   6  -1 19.7876 2.78064   8
  -5  -6   1 24.8316 2.71185   9
   5  -6  -1 22.2105 2.36136   8
  -5  -6   1 15.6160 1.67971   2
  -5  -6   1 14.2852 1.37341   7
  -5  -6   1 20.6238 1.43412  10
  -5   6  -1 21.8941 2.64115   4
  -5  -6   1 17.4273 1.83351   2
  -5   6  -1 15.6724 2.83523   1
  -5  -6   1 16.6400 3.53201   8
   5  -6  -1 15.4042 2.98535   9
   5  -6  -1 16.6821 2.36376   2
  -5   6  -1 24.9209 3.51987   9
   5  -6  -1 22.3193 3.01950   4
  -5   6  -1 18.6026 1.76739   7
   5  -6  -1 18.4504 1.72245  10
  -5   6  -1 21.0317 2.44450   2
   5   6   1 17.5932 1.67810   4
  -5   6  -1 19.1608 3.26349   9
  -5   6  -1 17.5092 1.74363  10
  -5  -6   1 23.4756 2.97722   5
  -5   6  -1 19.0761 1.91014   5
   5  -6  -1 19.0530 1.99764   5
  -5  -6   1 21.2123 2.67350   9
  -6   6   1 5.61282 2.36782   9
   6  -6   1 5.18299 1.67005   2
  -6   6   1 5.17961 1.70269   2
   6  -6   1 6.69847 2.07184   4
  -6  -6  -1 5.08456 1.10037   7
   6  -6   1 4.18166 1.16666  10
  -6  -6  -1 5.40098 1.95634   5
  -6   6   1 5.34698 2.07203   1
  -6   6   1 6.33989 1.39206  10
  -6   6   1 6.11398 1.45812   7
  -6  -6  -1 4.06967 1.74047   9
   6  -6   1 8.69924 2.81187   9
   6  -6   1 5.90605 1.62093   5
  -6   6   1 5.21406 1.84341   8
  -6  -6  -1 5.47842 1.01757  10
  -6  -6  -1 3.78658 2.53082   8
  -6   6   1 4.94814 1.56066   5
  -6   6   1 8.11556 2.12805   8
  -6  -6  -1 5.76951 1.35539   2
   6  -6   1 5.46252 1.90533   8
   6  -6  -1 4.62490 2.30332   9
  -6  -6   1 5.32888 1.42693   2
  -6  -6   1 4.88492 2.58682   8
  -6   6  -1 3.02768 1.89307   1
  -6  -6   1 5.92019 1.20224   7
  -6  -6   1 4.26176 1.01127  10
  -6   6  -1 5.22019 1.26709  10
   6  -6  -1 4.11883 1.74852   4
  -6   6  -1 5.80522 2.02409   8
   6  -6  -1 6.10400 1.84363   8
   6  -6  -1 4.02822 1.43842   5
  -6   6  -1 4.28550 1.69178   2
  -6   6  -1 4.35596 2.34579   9
   6  -6  -1 3.39633 1.19935  10
  -6  -6   1 4.60037 1.78888   9
  -6   6  -1 4.40025 1.29296   7
  -6  -6   1 4.48383 1.89527   5
  -6   6  -1 6.55176 1.63940   5
   6  -6  -1 4.37808 1.65282   2
   7  -6   1 7.38860 2.01511   2
  -7  -6  -1 14.9618 4.03789   8
  -7   6   1 9.53501 1.84039   7
  -7  -6  -1 13.5974 2.93573   9
  -7   6   1 8.90809 2.09941   5
  -7   6   1 16.1909 3.12045   8
  -7  -6  -1 12.8036 1.66313  10
  -7   6   1 8.55796 1.70759  10
  -7  -6  -1 10.4463 1.96384   2
  -7   6   1 11.1731 2.72845   1
   7  -6   1 11.0405 1.76722  10
   7  -6   1 15.8543 3.10068   8
  -7   6   1 11.3233 2.46831   2
  -7  -6  -1 8.57269 1.56927   7
  -7  -6  -1 8.80097 2.27096   5
   7  -6   1 6.06048 2.57567   9
  -7   6   1 17.8303 4.19869   9
  -7  -6   1 10.1872 2.45448   5
  -7  -6   1 11.6326 1.73618  10
   7  -6  -1 11.7520 1.85022  10
  -7  -6   1 14.8614 3.20302   9
  -7   6  -1 12.2283 1.98511   7
  -7   6  -1 13.3943 2.71694   2
  -7   6  -1 10.1829 1.88257  10
  -7  -6   1 14.4802 4.03819   8
  -7   6  -1 16.6853 3.27444   8
   7  -6  -1 6.59288 2.62087   9
   7  -6  -1 7.82511 2.03692   2
  -7  -6   1 11.1122 1.78461   7
  -7   6  -1 14.2691 3.76124   9
   7  -6  -1 13.7234 2.66851   8
  -7   6  -1 11.0567 2.74395   1
   7  -6  -1 9.85889 2.73864   4
  -7  -6   1 12.7015 2.16636   2
  -7   6  -1 9.57736 2.07944   5
  -8  -6  -1 116.637 7.17388   5
  -8  -6  -1 123.049 5.31011   7
  -8  -6  -1 134.339 5.28817  10
  -8  -6  -1 108.957 9.39241   8
  -8  -6  -1 127.130 7.98041   9
  -8  -6  -1 125.684 6.13661   2
  -8   6   1 133.289 5.88460   7
   8  -6   1 130.020 7.89810   8
   8  -6   1 129.615 5.18746  10
  -8   6   1 131.062 5.63280  10
  -8   6   1 130.561 7.45980   1
  -8   6   1 127.707 6.84435   2
  -8  -6   1 123.767 5.31906  10
  -8   6  -1 118.711 6.80843   2
   8  -6  -1 131.899 5.32850  10
  -8  -6   1 124.880 7.31126   5
  -8  -6   1 120.089 6.15310   2
  -8   6  -1 119.288 9.03207   9
  -8   6  -1 119.080 6.35192   5
  -8   6  -1 123.037 5.60724  10
  -8   6  -1 119.773 5.68040   7
  -8   6  -1 113.089 7.12071   1
  -8  -6   1 122.803 5.45690   7
  -8  -6   1 123.471 7.88642   9
  -8  -6   1 121.698 9.82598   8
  -8   6  -1 114.651 7.89376   8
  -9  -6  -1 0.95491 2.29713   9
  -9  -6  -1 1.25227 1.63837   2
  -9  -6  -1 1.62259 1.40771  10
  -9   6   1 2.01541 1.47688  10
  -9  -6  -1 2.89490 3.20322   8
  -9  -6  -1 2.24075 1.60934   7
  -9   6   1 2.30350 1.61333   7
  -9  -6   1 1.47087 2.40068   9
  -9  -6   1 0.51206 1.36375  10
  -9  -6   1 3.99461 1.69525   7
  -9  -6   1 2.68333 3.19203   8
  -9   6  -1 1.52711 2.50716   2
   9  -6  -1 1.55142 1.31180  10
  -9   6  -1 1.55735 1.91850   5
  -9  -6   1 1.21832 1.62973   2
  -9   6  -1 3.03814 1.71601   7
  -9   6  -1 1.97755 1.49436  10
 -10   6   1 41.6519 3.92658   7
 -10  -6  -1 50.3207 3.94231   7
 -10  -6  -1 43.0998 4.36130   2
 -10  -6  -1 48.0559 6.05731   9
 -10   6   1 40.3824 3.63854  10
 -10  -6  -1 45.8852 3.67432  10
 -10  -6   1 42.0687 3.64835  10
 -10  -6   1 46.6855 3.88602   7
 -10   6  -1 48.5938 4.09093   7
 -10  -6   1 42.2219 4.37276   2
 -10  -6   1 40.4950 5.80690   9
 -10   6  -1 39.3315 3.70965  10
 -11   6   1 2.15418 1.91546   7
 -11  -6  -1 2.03802 1.87945   7
 -11  -6  -1 1.88684 2.17579   2
 -11  -6  -1 3.08652 3.04133   9
 -11  -6  -1 3.20590 1.87288  10
 -11   6   1 1.57914 1.75973  10
 -11  -6   1 2.21584 1.89377  10
 -11  -6   1 4.51273 3.22732   9
 -11  -6   1 2.17141 1.93137   7
 -11   6  -1 1.21005 1.69398  10
 -11  -6   1 1.97152 2.06630   2
 -11   6  -1 3.44507 2.06859   7
   0   7  -1 -0.1161 0.89406   1
   0  -7  -1 -0.1115 0.38853   4
   0  -7  -1 0.06411 0.62241   9
   0   7   1 -0.0760 0.62985   8
   0   7  -1 -0.0409 0.31063   5
   0  -7   1 0.01918 0.31794   5
   0   7  -1 -0.1754 0.72553   8
   0  -7   1 -0.2104 0.61522   9
   0  -7  -1 -0.0912 0.50577   9
   0  -7  -1 0.01306 0.37276   5
   0  -7   1 -0.0174 0.33845   2
   0  -7   1 -0.3008 0.73300   8
   0  -7   1 0.09911 0.70886   9
   0  -7   1 0.07780 0.36666   2
   0  -7  -1 -0.4401 0.61058   3
   0   7   1 0.36666 0.98799   1
   0  -7   1 -0.1051 0.52165   4
   0  -7  -1 0.16497 0.70419   8
   0   7  -1 0.20429 0.46745   4
   1  -7   1 3015.71 74.1365   8
  -1  -7  -1 2940.71 74.3466   8
   1   7  -1 2910.38 72.1298   5
   1  -7   1 2869.88 72.7730   4
   1  -7   1 2973.47 72.8249   2
  -1  -7  -1 2891.00 73.2693   3
  -1  -7  -1 2885.16 72.1804   4
   1   7  -1 2790.97 74.8574   8
  -1  -7  -1 2963.90 72.4768   9
  -1   7   1 2948.59 75.2072   1
   1  -7   1 2943.76 72.1848  10
   1  -7   1 2910.81 72.3140   2
   1  -7   1 2939.03 73.8692   9
  -1  -7  -1 2913.73 74.7344   8
   1   7  -1 2803.20 72.3004   4
   1  -7   1 2998.68 73.6987   9
  -1   7   1 2905.15 74.1620   8
   1   7  -1 2870.23 74.3479   1
  -1  -7  -1 2887.59 72.2046   5
   1  -7   1 2806.86 71.6618   7
  -1  -7  -1 2810.73 72.3111   9
   1  -7  -1 2885.20 72.4085   4
   1  -7  -1 2974.17 73.0334   9
   1   7   1 2762.35 74.4455   8
  -1  -7   1 2920.14 73.3437   5
   1   7   1 2818.76 72.2684   5
   1  -7  -1 2895.26 73.2615   9
  -1  -7   1 2899.33 75.1821   8
  -1   7  -1 2879.00 72.4955   4
   1   7   1 2887.46 74.3471   1
  -1  -7   1 2883.38 73.0383   9
   1  -7  -1 2899.09 71.7538   5
  -1  -7   1 2907.84 73.0010   9
  -1   7  -1 2843.44 75.0074   1
  -1  -7   1 2893.40 71.5741   2
  -1  -7   1 2902.40 73.3724   3
  -1   7  -1 2905.43 73.9080   8
   1  -7  -1 2912.93 72.5650   2
  -1   7  -1 2981.22 71.5585   2
   1  -7  -1 2913.16 71.7513   2
   1  -7  -1 2955.87 74.3800   8
  -1   7  -1 2839.51 73.6452   9
   2  -7   1 -0.4561 0.57641   2
   2   7  -1 -0.1444 1.02225   8
   2  -7   1 0.27036 0.84099   8
  -2   7   1 0.57806 0.99039   9
  -2  -7  -1 0.54672 1.14599   8
   2   7  -1 0.18346 0.46732   4
  -2   7   1 0.32584 0.59330   8
  -2  -7  -1 0.07345 1.02432   8
  -2  -7  -1 -0.3450 0.52948   9
   2  -7   1 0.35970 0.63604   2
  -2   7   1 -0.4081 1.14985   1
   2  -7   1 0.14826 0.44272  10
   2   7  -1 -0.2641 0.81351   1
   2  -7   1 -0.4119 0.68618   4
   2  -7   1 0.13811 0.92765   9
  -2   7   1 -0.4374 0.42768   2
  -2  -7  -1 0.21525 0.67058   5
  -2  -7  -1 0.12426 0.50517   9
   2   7  -1 -0.0867 0.61562   5
   2   7   1 0.51739 1.09488   8
  -2   7  -1 0.02104 0.58235   2
  -2  -7   1 0.01538 0.49712   3
   2  -7  -1 0.21156 0.32546   5
  -2  -7   1 0.05547 0.29965   2
   2   7   1 -0.0062 0.66853   5
   2  -7  -1 -0.0634 0.61355   2
   2  -7  -1 -0.0803 0.97267   9
  -2  -7   1 0.04184 0.66135   9
   2  -7  -1 0.25500 0.53153   2
   2  -7  -1 0.52566 0.63569   8
   2   7   1 0.09982 0.82450   1
   2  -7  -1 -0.0939 0.35009  10
  -2   7  -1 0.56276 1.06079   9
   2  -7  -1 0.38606 0.72372   4
  -2  -7   1 0.16156 0.64283   5
  -2   7  -1 -0.0637 0.32970   7
  -2   7  -1 -0.1437 1.13890   1
  -2   7  -1 0.18975 0.85573   8
  -2   7  -1 0.01520 0.34054   7
   2  -7  -1 0.39400 0.84158   9
  -2  -7   1 -0.1630 0.72797   9
  -2  -7   1 0.22375 1.10011   8
  -2  -7   1 0.18930 0.34024   2
  -2   7  -1 0.30692 0.67884   4
  -3   7   1 3231.68 79.3451   8
  -3   7   1 3157.08 79.2687   2
  -3  -7  -1 3254.60 83.5831   8
  -3  -7  -1 3280.55 79.6852   9
   3   7  -1 3148.10 79.9752   5
  -3   7   1 3223.79 79.2537   2
  -3   7   1 3224.05 81.4372   9
   3  -7   1 3246.54 81.7584   9
   3   7  -1 3208.53 83.4055   8
   3   7  -1 3189.89 80.2199   1
   3  -7   1 3199.01 79.6117   2
  -3   7   1 3306.24 77.8453  10
  -3   7   1 3269.71 78.1221   7
   3  -7   1 3181.21 78.6181  10
   3  -7   1 3234.19 80.5210   4
  -3  -7  -1 3234.52 80.0119   5
  -3  -7  -1 3324.08 79.3458   9
   3  -7   1 3179.04 78.3742   5
  -3  -7  -1 3341.73 83.0525   8
  -3   7   1 3237.01 82.5505   1
   3  -7   1 3186.39 80.4259   8
  -3  -7  -1 3161.50 80.0543   1
   3   7   1 3076.02 83.0637   8
   3   7   1 3077.40 80.0238   5
  -3  -7   1 3044.97 80.1496   1
  -3   7  -1 3212.01 79.6482   2
   3  -7  -1 3038.33 80.1506   4
  -3   7  -1 3043.24 80.0631   4
  -3   7  -1 3105.93 78.4724   7
  -3   7  -1 3172.58 81.8478   9
   3  -7  -1 3009.50 79.3104   2
  -3   7  -1 3171.81 78.0139   6
  -3   7  -1 3223.04 79.7006   2
  -3   7  -1 3156.09 80.7082   8
  -3  -7   1 3084.23 78.3490   2
  -3  -7   1 3199.80 82.9295   8
   3  -7  -1 3167.77 79.0362   8
   3   7   1 3099.04 79.9888   1
  -3  -7   1 3201.30 80.4213   9
   3  -7  -1 3086.49 78.3868   5
  -3   7  -1 3182.92 78.4419  10
  -3  -7   1 3087.29 79.9143   9
  -3  -7   1 3091.35 83.5222   8
  -3  -7   1 3191.62 78.2330   2
   3  -7  -1 3118.24 78.4944  10
   3  -7  -1 3055.62 81.0944   9
  -3   7  -1 3106.41 78.2774   5
  -3   7  -1 3067.81 82.2606   1
  -3  -7   1 3093.34 79.9126   5
  -4   7   1 0.43719 1.27547   9
   4   7  -1 0.38792 0.81015   1
  -4   7   1 -0.0957 0.60377   7
  -4  -7  -1 -0.1961 1.43680   8
  -4  -7  -1 0.15931 0.46885   2
  -4   7   1 -0.2049 0.83070   2
   4  -7   1 0.04990 0.64695   5
   4   7  -1 0.29125 1.04493   5
   4  -7   1 0.21729 1.42813   9
  -4  -7  -1 -0.0766 0.98379   5
   4  -7   1 0.58399 0.96085   2
  -4   7   1 -0.5627 1.24571   1
  -4  -7  -1 -0.0752 0.77759   1
  -4  -7  -1 0.39500 0.93592   9
   4  -7   1 -0.4161 0.97601   4
  -4   7   1 0.83379 0.61210  10
  -4   7   1 0.29781 1.42459   9
  -4   7   1 0.17969 0.81922   8
  -4  -7  -1 0.04021 0.44577   2
  -4  -7  -1 0.67447 0.88392   9
   4  -7   1 0.01004 0.94516   8
   4  -7   1 0.94753 0.77323  10
   4   7  -1 0.35864 0.65528   4
   4   7   1 0.29161 0.75224   1
   4  -7  -1 0.46549 0.65887   5
  -4   7  -1 -0.0396 0.62903   5
   4  -7  -1 -0.5271 0.93104   4
  -4  -7   1 0.23192 1.01448   9
   4  -7  -1 0.37566 0.66592  10
  -4   7  -1 -0.3710 0.95062   8
  -4   7  -1 -0.5445 0.59733  10
   4  -7  -1 -0.6863 1.17436   9
  -4  -7   1 0.57228 0.89007   1
  -4  -7   1 0.92596 1.04338   5
  -4   7  -1 1.08799 1.48860   9
  -4  -7   1 0.29049 0.43430   7
  -4  -7   1 0.77150 0.59901   2
  -4  -7   1 0.46109 0.93182   9
  -4   7  -1 -0.2907 0.91458   2
   4  -7  -1 -0.0588 0.82793   2
  -4   7  -1 0.48948 1.05118   4
  -4  -7   1 -0.0614 0.62333   2
  -4   7  -1 -0.0612 1.32582   1
  -4   7  -1 0.06692 0.66482   7
   4   7   1 -0.1532 0.98422   5
  -4  -7   1 -0.2031 1.32723   8
   4   7   1 0.27102 0.46415   4
   4  -7  -1 0.05291 0.75759   8
  -5   7   1 708.971 20.2720   2
   5  -7   1 703.547 22.7495   9
  -5  -7  -1 679.459 20.7711   5
  -5  -7  -1 735.328 18.4845   1
  -5   7   1 697.595 22.7214   9
  -5  -7  -1 699.936 24.4644   8
  -5   7   1 698.481 18.8185  10
  -5  -7  -1 680.660 18.6506   2
   5  -7   1 698.690 21.2814   4
   5  -7   1 699.155 20.2846   2
  -5  -7  -1 711.540 18.4224   1
   5  -7   1 693.335 19.4390   5
  -5  -7  -1 705.960 18.8955   2
   5  -7   1 694.468 19.0338  10
  -5   7   1 731.874 20.4628   8
   5   7  -1 699.865 18.6384   1
  -5  -7  -1 726.893 20.6672   9
  -5   7   1 694.904 19.0121   7
  -5   7   1 679.743 20.3747   8
  -5  -7  -1 700.315 20.7589   9
  -5   7   1 696.628 22.4316   1
   5  -7   1 732.311 21.1680   8
  -5  -7   1 702.483 21.2173   9
   5  -7  -1 709.086 21.1925   4
  -5   7  -1 693.303 19.1098   7
  -5   7  -1 702.169 22.4597   1
  -5   7  -1 722.240 23.0737   9
  -5  -7   1 698.275 18.2998   7
  -5   7  -1 703.963 20.5162   2
  -5  -7   1 693.874 19.3675   2
  -5  -7   1 704.587 20.8593   5
   5   7   1 726.703 18.4928   1
   5  -7  -1 694.718 19.4130   5
   5  -7  -1 727.704 20.1685   8
  -5   7  -1 704.322 23.0811   9
   5  -7  -1 707.209 22.4827   9
  -5  -7   1 603.542 18.0400  10
   5   7   1 696.466 18.8579   4
   5  -7  -1 691.374 18.9418  10
  -5   7  -1 716.637 19.3837   5
   5  -7  -1 697.363 20.1750   2
  -5  -7   1 681.636 18.6357   1
  -5  -7   1 715.690 24.7689   8
  -5  -7   1 706.350 19.1000   2
  -5  -7   1 685.642 20.9193   9
  -5   7  -1 694.489 19.0323  10
  -5   7  -1 705.149 21.5467   8
  -5   7  -1 718.221 21.1053   4
   6  -7   1 -0.1776 1.15087   2
  -6  -7  -1 0.32005 1.24824   5
  -6   7   1 0.30642 1.78515   9
  -6   7   1 -0.4304 1.45252   1
  -6   7   1 0.08240 1.20955   2
  -6  -7  -1 1.05353 2.05463   8
  -6   7   1 0.58483 1.16018   8
   6  -7   1 0.77316 1.31886   4
   6  -7   1 1.31914 1.08675   5
  -6  -7  -1 0.02908 0.75157   7
   6  -7   1 0.76670 1.85906   9
  -6  -7  -1 0.10896 0.63161  10
  -6  -7  -1 -0.2290 0.82889   2
   6  -7   1 0.24102 0.88128  10
  -6   7   1 0.58256 0.89813   7
  -6   7   1 -0.1231 1.19477   8
   6  -7   1 -1.1167 1.08528   8
  -6  -7  -1 0.45650 1.22724   9
  -6   7   1 -0.0137 0.81168  10
   6  -7  -1 0.76794 0.96759  10
  -6   7  -1 0.41754 0.92257   7
  -6  -7   1 0.77604 0.77458  10
  -6   7  -1 0.53118 1.69163   9
   6  -7  -1 0.12278 1.55378   9
  -6   7  -1 -0.6986 0.93284   5
  -6   7  -1 -0.9425 1.76794   9
   6  -7  -1 0.06327 1.16247   2
  -6  -7   1 0.64146 1.31247   9
  -6  -7   1 0.07160 0.93200   2
  -6   7  -1 0.47183 1.43169   8
  -6  -7   1 0.76585 1.88690   8
  -6   7  -1 0.23973 0.88165  10
  -6   7  -1 -0.6030 1.45705   1
  -6  -7   1 0.24615 0.75893   7
   6  -7  -1 0.05232 1.39499   4
   6  -7  -1 1.11839 1.03610   5
  -6  -7   1 0.27056 1.26727   5
  -6   7  -1 0.77460 1.21108   2
   6  -7  -1 -0.0812 1.05497   8
   7  -7   1 30.3638 3.64087   8
   7  -7   1 28.5873 2.50756  10
  -7  -7  -1 35.5819 6.13357   8
  -7   7   1 29.4828 3.95660   1
  -7  -7  -1 26.3476 2.69012   2
   7  -7   1 28.3520 4.96432   9
  -7   7   1 26.2600 3.43356   8
  -7   7   1 26.6279 2.57007   7
  -7   7   1 28.9479 2.50853  10
  -7  -7  -1 31.5327 4.17881   5
  -7   7   1 29.2259 3.33848   2
   7  -7   1 30.5044 3.36572   2
  -7  -7  -1 29.4317 3.66948   9
  -7  -7  -1 30.4984 2.28656   7
  -7  -7  -1 23.3938 2.00468  10
  -7   7  -1 34.7230 5.02125   9
  -7   7  -1 37.4595 2.81808  10
   7  -7  -1 40.1973 3.58385   2
  -7   7  -1 34.5358 3.60273   2
  -7  -7   1 33.9770 5.40980   8
  -7   7  -1 36.6090 4.32674   1
  -7  -7   1 36.0263 3.06833   2
   7  -7  -1 34.2944 3.87536   4
   7  -7  -1 32.1180 3.45143   8
   7  -7  -1 38.9468 2.76336  10
  -7  -7   1 38.4261 4.13242   9
  -7   7  -1 34.3426 3.06409   5
  -7  -7   1 34.8910 2.51944   7
   7  -7  -1 38.8855 4.87640   9
  -7  -7   1 39.7148 2.52897  10
  -7   7  -1 37.2070 5.08583   9
  -7  -7   1 38.6461 3.95759   5
  -7   7  -1 35.0498 2.78334   7
  -7   7  -1 31.1693 3.91404   8
  -8   7   1 0.78515 1.28802   7
  -8  -7  -1 -0.6295 1.64379   5
  -8   7   1 -0.0173 1.08663  10
   8  -7   1 -0.7774 1.53297   8
  -8  -7  -1 -0.1359 1.06798  10
  -8   7   1 -0.5153 1.72394   1
  -8  -7  -1 -0.2559 1.20424   2
  -8  -7  -1 0.29789 2.40516   8
  -8  -7  -1 -0.4172 1.64642   9
   8  -7   1 -0.1406 1.05892  10
  -8   7  -1 0.91655 1.28349   7
   8  -7  -1 0.09167 1.14673  10
  -8   7  -1 0.56990 1.85030   1
  -8  -7   1 -0.2582 1.59849   9
  -8   7  -1 -0.2152 1.50084   5
  -8  -7   1 0.56683 1.71093   5
  -8  -7   1 0.18845 1.15868   7
  -8  -7   1 0.88249 1.40124   2
  -8  -7   1 1.65742 1.26784  10
  -8  -7   1 -1.3218 2.16190   8
  -8   7  -1 0.67497 1.21258  10
  -8   7  -1 0.85322 1.65445   2
  -9   7   1 101.675 5.42685   7
  -9  -7  -1 98.1219 7.57411   9
   9  -7   1 89.7515 4.61495  10
  -9  -7  -1 93.6380 5.73280   2
  -9  -7  -1 95.7709 10.6019   8
  -9   7   1 93.5228 5.07011  10
  -9  -7  -1 100.122 4.95226  10
  -9  -7   1 109.272 8.03921   9
  -9  -7   1 103.798 5.26199   7
  -9   7  -1 98.4742 5.27139  10
  -9  -7   1 104.333 9.86825   8
  -9  -7   1 101.136 5.10263  10
  -9  -7   1 106.338 6.12305   2
  -9   7  -1 108.979 5.58998   7
   9  -7  -1 99.9421 4.82781  10
 -10  -7  -1 -0.4344 1.61319   2
 -10  -7  -1 -1.6837 1.93866   9
 -10   7   1 -0.1714 1.34843  10
 -10   7   1 1.63430 1.68689   7
 -10  -7  -1 1.10548 1.47199  10
 -10  -7   1 0.78615 1.47561   7
 -10   7  -1 -0.8506 1.47352   7
 -10  -7   1 1.38417 1.77767   2
 -10   7  -1 -0.9511 1.26624  10
 -10  -7   1 -0.4467 1.35972  10
 -10  -7   1 0.06538 2.19005   9
 -11  -7  -1 44.2012 6.45487   9
 -11  -7  -1 44.4177 4.00787  10
 -11   7   1 42.0269 3.91976  10
 -11  -7  -1 48.7195 4.98313   2
 -11   7   1 46.5062 4.34633   7
 -11  -7   1 45.0972 4.23849   7
 -11   7  -1 43.2482 4.02496  10
 -11   7  -1 43.0741 4.63032   7
 -11  -7   1 50.2257 6.70731   9
 -11  -7   1 38.7747 4.75214   2
 -11  -7   1 41.1329 4.01969  10
   0   8   1 5.95819 1.49364   8
   0  -8  -1 5.81381 1.12012   9
   0  -8   1 5.11570 1.29897   9
   0  -8   1 5.06207 1.37679   9
   0  -8  -1 4.19830 0.83993   4
   0  -8   1 6.46826 0.85014   2
   0  -8   1 6.64504 0.81705   2
   0  -8  -1 5.26940 0.78370   5
   0   8  -1 8.83338 1.95561   8
   0  -8  -1 4.71549 1.12436   9
   0   8   1 8.52476 2.17528   1
   0   8  -1 6.61509 1.02463   4
   0  -8  -1 5.38865 1.37638   3
   0  -8  -1 5.66910 1.48905   8
   0   8  -1 5.40237 0.73567   5
   0  -8   1 6.32330 1.22006   4
   0  -8   1 5.11519 1.61912   8
   0  -8   1 5.51580 0.74406   5
   0   8  -1 8.35718 2.11212   1
   1  -8   1 16.5570 1.52602   2
  -1   8   1 16.7850 2.65947   1
  -1  -8  -1 19.4873 1.52934   9
   1  -8   1 15.3257 1.73167   4
  -1  -8  -1 16.0556 1.18552   4
   1  -8   1 16.5954 2.20617   9
  -1  -8  -1 16.4893 2.44122   8
   1  -8   1 11.9057 1.26125   2
  -1  -8  -1 21.1919 2.45603   8
   1   8  -1 15.1743 1.16654   4
  -1   8   1 16.0297 1.79105   8
   1   8  -1 19.0872 2.60087   8
   1  -8   1 12.7037 1.98878   9
   1  -8   1 17.6898 0.94479  10
   1  -8   1 15.8399 2.23107   8
   1   8  -1 14.0194 2.27453   1
  -1  -8  -1 20.1884 1.54870   5
   1  -8   1 15.8804 1.14558   7
   1   8  -1 17.4045 1.42901   5
  -1  -8  -1 20.7929 2.04587   3
  -1   8  -1 18.0028 1.59835   4
  -1  -8   1 13.7695 2.48857   8
  -1  -8   1 17.6119 0.84659   2
   1  -8  -1 18.1103 1.60204   4
  -1   8  -1 13.9543 2.05266   8
  -1   8  -1 11.7756 2.40792   1
   1   8   1 15.7020 2.33188   1
  -1  -8   1 18.2497 1.88719   9
   1  -8  -1 19.1237 0.84764   6
   1   8   1 19.4279 1.58986   5
  -1  -8   1 13.4653 0.80044   2
   1  -8  -1 19.2034 2.11293   9
   1  -8  -1 15.4577 1.07400   2
   1  -8  -1 19.4205 0.88559   5
   1  -8  -1 15.8792 1.22157   2
  -1  -8   1 14.8092 1.33382   5
  -1  -8   1 12.2122 1.69525   9
   1   8   1 20.7093 2.53825   8
   1  -8  -1 12.3586 1.70324   9
   1  -8  -1 14.5153 1.78728   8
  -2  -8  -1 423.879 12.2207   9
   2  -8   1 400.119 12.8307   2
  -2  -8  -1 441.199 15.1200   8
  -2  -8  -1 449.628 12.5811   9
  -2  -8  -1 435.737 15.5802   8
   2   8  -1 449.491 14.4263   1
  -2   8   1 449.384 15.5410   1
   2  -8   1 446.850 12.6884   2
  -2  -8  -1 417.588 13.4152   3
   2  -8   1 455.192 14.3996   9
   2   8  -1 430.827 11.8354   4
   2  -8   1 437.612 13.3861   4
   2   8  -1 425.104 12.8099   5
  -2   8   1 436.999 12.7680   8
   2  -8   1 437.460 13.9156   8
   2  -8   1 446.999 11.8505  10
   2   8  -1 427.853 15.4026   8
  -2  -8  -1 434.252 12.8554   5
   2  -8  -1 439.557 12.6828   2
  -2   8  -1 418.707 13.0181   4
   2  -8  -1 451.075 12.3968   2
   2  -8  -1 458.290 12.9202   8
   2   8   1 460.347 14.4238   1
   2  -8  -1 451.780 11.6561  10
  -2  -8   1 471.834 13.6056   9
  -2  -8   1 444.352 12.8560   5
   2   8   1 434.302 15.4205   8
   2  -8  -1 425.726 13.9919   9
  -2   8  -1 486.426 15.8742   1
   2  -8  -1 459.074 13.2331   4
  -2   8  -1 434.891 14.3673   9
  -2   8  -1 463.154 12.3309   2
  -2   8  -1 456.377 14.0147   8
   2  -8  -1 468.883 14.0425   9
  -2  -8   1 452.503 12.3484   3
  -2  -8   1 443.468 13.1967   9
   2  -8  -1 461.483 11.3191   5
  -2  -8   1 431.198 15.7340   8
   2   8   1 453.155 13.0541   5
   3  -8   1 28.6855 2.40154   2
   3  -8   1 43.1287 1.78535   5
   3  -8   1 42.3584 3.09916   8
  -3   8   1 32.2786 2.10388   2
  -3  -8  -1 32.0586 2.43319   9
   3  -8   1 37.1188 2.97386   4
   3  -8   1 26.5282 3.15594   9
   3   8  -1 40.8443 2.82404   5
  -3   8   1 34.8705 3.84444   1
   3   8  -1 31.5129 2.86090   1
  -3   8   1 32.6291 2.29007   8
   3   8  -1 40.3153 1.93216   4
  -3   8   1 41.5713 3.63030   9
  -3  -8  -1 43.6243 4.37378   8
  -3  -8  -1 40.1154 2.79070   5
   3  -8   1 35.1049 2.01043  10
  -3   8  -1 35.7781 1.76584   7
  -3  -8   1 34.9223 2.63203   5
   3   8   1 37.6017 3.00210   1
  -3   8  -1 39.4899 1.44493   6
  -3   8  -1 44.7639 3.01012   4
  -3   8  -1 41.0296 3.79718   9
  -3  -8   1 33.7010 1.62984   2
  -3   8  -1 32.8226 3.72804   1
  -3  -8   1 34.2226 4.05808   8
   3  -8  -1 35.3447 1.72243   5
  -3   8  -1 39.1680 2.54479   2
  -3   8  -1 34.4326 2.98262   8
   3  -8  -1 30.3595 2.33641   2
   3  -8  -1 27.4939 3.00475   9
   3  -8  -1 37.6517 2.86516   4
   3  -8  -1 38.8977 1.94869  10
  -3  -8   1 33.5801 1.73676   2
  -3  -8   1 47.1104 2.95651   9
  -3   8  -1 35.8273 1.66074  10
   3   8   1 37.5676 2.79042   5
   3  -8  -1 42.4298 2.39654   8
   4  -8   1 561.224 16.5569   2
   4  -8   1 532.631 16.9022   8
  -4   8   1 544.796 19.0104   1
   4   8  -1 562.456 16.5394   1
  -4  -8  -1 556.434 16.9298   5
  -4  -8  -1 559.710 14.3892   2
   4  -8   1 576.078 18.7935   9
  -4   8   1 568.580 14.7503  10
  -4   8   1 555.039 14.9756   7
   4  -8   1 570.324 15.4408  10
  -4  -8  -1 534.695 16.2200   9
   4   8  -1 549.874 16.9582   5
  -4   8   1 548.004 18.5766   9
  -4  -8  -1 568.367 16.6944   9
   4  -8   1 549.003 15.2641   5
  -4   8   1 560.208 16.2731   8
  -4   8   1 565.294 16.2899   2
  -4  -8  -1 538.953 20.1655   8
   4  -8   1 559.100 17.4114   4
  -4   8   1 523.943 18.2317   9
   4   8  -1 553.550 15.3032   4
  -4  -8  -1 585.753 17.0142   1
  -4  -8   1 586.925 17.0648   5
   4  -8  -1 550.923 15.2697   5
  -4   8  -1 564.959 17.5181   8
  -4   8  -1 574.689 18.9390   9
   4  -8  -1 554.636 15.8638   8
  -4  -8   1 578.462 17.3752   9
  -4   8  -1 558.784 17.1494   4
   4   8   1 534.347 17.0373   5
  -4   8  -1 583.495 15.2525   5
  -4  -8   1 557.298 16.9484   9
  -4  -8   1 581.154 15.4251   2
  -4  -8   1 558.939 20.4831   8
   4  -8  -1 590.020 18.5523   9
   4  -8  -1 577.729 16.4327   2
   4  -8  -1 557.402 15.3237  10
  -4   8  -1 570.439 19.2570   1
  -4   8  -1 572.054 14.7743   6
   4   8   1 557.166 16.3493   1
   4  -8  -1 541.013 17.1459   4
  -4  -8   1 597.369 15.2000   2
  -4   8  -1 567.970 15.2922   7
  -4   8  -1 582.550 16.6720   2
  -4   8  -1 592.152 15.2615  10
   5  -8   1 17.5228 2.54198   2
  -5  -8  -1 19.9957 2.80868   5
  -5   8   1 23.3444 2.45798   8
  -5  -8  -1 17.7166 1.63012   2
  -5   8   1 22.2914 1.82829   7
   5  -8   1 27.8434 2.90218   8
  -5  -8  -1 16.5839 1.82449   1
  -5  -8  -1 21.2729 2.52964   9
   5  -8   1 19.6821 2.86988   4
   5  -8   1 18.0203 3.48546   9
  -5   8   1 23.0225 3.49452   1
  -5   8   1 20.7014 2.37984   2
   5   8  -1 21.0671 1.92357   1
  -5   8   1 26.1900 4.19965   9
   5  -8   1 21.5100 1.97757   5
  -5  -8  -1 24.0698 2.55632   9
  -5  -8  -1 25.0844 4.66105   8
  -5   8   1 23.0060 3.57551   9
  -5  -8  -1 17.0631 1.53412   2
   5  -8   1 18.3142 1.85014  10
  -5   8   1 19.8509 1.64305  10
  -5   8  -1 22.5609 2.71423   4
  -5  -8   1 26.0962 3.19098   5
  -5  -8   1 21.7108 2.04317   1
   5  -8  -1 14.6790 2.23852   2
  -5  -8   1 19.5126 1.38210   7
   5  -8  -1 22.2379 1.88425  10
  -5   8  -1 19.7753 1.85325   7
  -5  -8   1 23.5835 4.46542   8
  -5  -8   1 22.8177 2.80172   9
   5   8   1 22.5685 1.56316   4
  -5   8  -1 20.0267 2.80506   8
  -5  -8   1 29.7162 2.97758   9
   5  -8  -1 25.8898 3.40248   4
  -5   8  -1 18.0774 1.81203   5
   5  -8  -1 23.2684 1.99945   5
  -5   8  -1 22.6986 3.78866   9
  -5  -8   1 20.0707 1.28245  10
  -5   8  -1 21.4096 3.41501   1
   5  -8  -1 19.8079 3.63660   9
  -5   8  -1 16.2041 1.68357  10
  -5   8  -1 18.2255 2.53443   2
  -5  -8   1 20.3540 1.96756   2
  -5  -8   1 18.5800 1.73801   2
  -6  -8  -1 623.703 18.3252  10
  -6   8   1 701.879 21.2768   8
  -6   8   1 740.227 19.5802  10
  -6  -8  -1 736.783 19.9649   2
  -6  -8  -1 717.760 26.3210   8
  -6   8   1 742.679 25.7296   9
  -6   8   1 727.363 25.4962   9
  -6  -8  -1 714.212 21.9464   5
  -6   8   1 710.751 21.2546   2
  -6  -8  -1 677.231 21.7268   9
   6  -8   1 724.594 22.5220   4
   6  -8   1 732.151 19.8373  10
  -6   8   1 734.285 23.7718   1
   6  -8   1 702.111 20.2905   5
   6  -8   1 736.717 21.4036   2
  -6   8   1 727.000 19.8050   7
   6  -8   1 736.124 24.3466   9
   6  -8   1 711.086 21.9653   8
  -6   8  -1 706.949 24.5673   9
  -6  -8   1 719.109 22.0506   5
  -6  -8   1 710.171 22.4162   9
  -6   8  -1 724.846 19.7782  10
   6  -8  -1 701.384 20.9811   8
   6  -8  -1 730.187 19.7853  10
  -6   8  -1 736.827 20.2915   5
   6  -8  -1 699.384 22.2832   4
   6  -8  -1 728.689 20.3150   5
   6  -8  -1 729.794 21.2982   2
  -6   8  -1 712.378 22.6284   8
  -6  -8   1 718.911 19.1286   7
  -6  -8   1 728.127 20.3498   2
  -6   8  -1 722.683 21.6009   2
   6  -8  -1 740.870 24.1041   9
  -6  -8   1 724.837 26.4091   8
  -6  -8   1 699.483 18.9584  10
  -6   8  -1 717.458 19.9065   7
  -6   8  -1 718.788 23.7078   1
  -6   8  -1 688.523 24.2469   9
  -7   8   1 0.98176 1.06246  10
  -7   8   1 0.32863 1.08620   7
  -7  -8  -1 1.19429 2.41114   8
   7  -8   1 1.24529 1.17826  10
   7  -8   1 -0.0413 1.42204   2
  -7  -8  -1 0.56074 0.87050  10
   7  -8   1 0.25212 2.18601   9
   7  -8   1 2.02841 1.67512   8
  -7   8   1 -0.4170 1.71984   1
  -7  -8  -1 1.54673 1.22445   2
  -7  -8  -1 0.08001 1.34944   9
  -7  -8  -1 1.31249 1.73362   5
   7  -8  -1 0.13748 1.09501  10
  -7  -8   1 0.03647 0.91593  10
   7  -8  -1 0.79777 1.37727   8
  -7   8  -1 1.02351 1.26244   5
   7  -8  -1 1.04352 1.60614   4
  -7   8  -1 0.48572 1.43770   2
  -7   8  -1 0.88034 1.11736   7
  -7   8  -1 1.81599 1.74568   8
   7  -8  -1 -0.5141 1.73261   9
  -7  -8   1 0.12361 1.52943   5
  -7  -8   1 2.30293 2.67230   8
  -7   8  -1 0.36027 1.80562   1
  -7  -8   1 0.72798 1.14566   2
   7  -8  -1 -0.2390 1.31117   2
  -7  -8   1 0.94933 1.60514   9
  -7  -8   1 0.11581 0.95620   7
  -7   8  -1 0.99505 1.10560  10
  -8  -8  -1 63.8966 5.73268   9
  -8  -8  -1 72.0692 4.59449   2
  -8   8   1 72.0452 4.07492  10
  -8  -8  -1 70.9473 7.94550   8
   8  -8   1 77.8701 4.09704  10
  -8   8   1 76.3789 4.30502   7
  -8  -8  -1 76.6993 3.78739  10
  -8   8   1 68.3340 6.12878   1
   8  -8  -1 75.2438 5.30205   2
  -8  -8   1 77.1472 4.09236   7
  -8   8  -1 77.4592 6.32638   1
  -8   8  -1 80.8378 4.35791  10
  -8  -8   1 88.3173 9.30282   5
  -8  -8   1 71.1890 6.03376   9
  -8  -8   1 73.5556 3.96696  10
  -8   8  -1 71.5402 4.30039   7
  -8  -8   1 68.8684 8.01097   8
  -8  -8   1 75.7088 4.83118   2
   9  -8   1 4.55949 1.64146  10
  -9   8   1 4.83149 1.81528   7
  -9  -8  -1 3.62981 1.57238  10
  -9   8   1 4.80603 1.72167  10
  -9  -8  -1 8.13800 3.17595   9
  -9  -8  -1 6.88618 2.20384   2
  -9  -8   1 4.95196 2.08404   2
  -9  -8   1 7.05390 3.04686   9
   9  -8  -1 4.60648 1.69394  10
  -9   8  -1 4.79877 1.72730  10
  -9   8  -1 5.54065 1.92041   7
  -9  -8   1 4.83231 1.67580  10
 -10   8   1 38.4529 3.77007   7
 -10  -8  -1 40.0980 4.21109   2
 -10   8   1 44.9242 3.66634  10
 -10  -8  -1 44.5022 3.66009  10
 -10  -8  -1 37.9541 5.98287   9
 -10  -8   1 42.4518 3.69026  10
 -10   8  -1 40.6113 3.80279   7
 -10   8  -1 37.8340 3.60925  10
 -10  -8   1 41.5272 4.36740   2
 -10  -8   1 39.4154 6.25020   9
 -11  -8  -1 -1.8959 1.43461  10
 -11  -8  -1 -0.2042 2.44726   9
 -11   8   1 1.70361 1.80742   7
 -11  -8  -1 -1.7485 1.71196   2
 -11  -8   1 0.79797 1.69489  10
 -11   8  -1 0.63328 1.65147  10
 -11  -8   1 2.24770 2.94865   9
 -11  -8   1 0.91746 2.00952   2
   0  -9   1 0.43148 1.01701   9
   0  -9   1 0.18801 1.08813   8
   0   9  -1 0.21165 1.05555   8
   0  -9   1 0.81159 0.80071   4
   0   9  -1 0.14543 0.46448   5
   0   9  -1 0.38246 0.54932   4
   0  -9   1 0.13787 0.48525   2
   0  -9  -1 0.44702 0.60946   4
   0  -9  -1 0.30366 0.98764   8
   0  -9  -1 0.30633 0.90671   3
   0  -9  -1 0.25115 0.47056   5
   0   9  -1 0.59429 1.37461   1
   0   9   1 -0.6285 1.04561   1
   0  -9   1 0.78274 0.97118   9
   0  -9   1 -0.0242 0.48483   2
   0  -9  -1 0.37946 0.82788   9
   0   9   1 0.81727 0.96543   8
   0  -9  -1 0.14927 0.75656   9
  -1  -9  -1 366.379 10.0706   4
   1   9  -1 360.817 12.9890   1
  -1  -9  -1 369.777 13.1049   8
   1  -9   1 358.590 10.5549   2
  -1   9   1 374.181 13.6601   1
   1   9  -1 360.651 13.1886   8
  -1  -9  -1 352.498 11.5342   3
   1  -9   1 352.410 9.80254   7
  -1  -9  -1 361.237 12.6350   8
   1  -9   1 376.482 12.0218   9
   1   9  -1 360.908 10.3298   5
  -1  -9  -1 369.154 10.5995   9
   1  -9   1 359.241 12.1509   9
   1   9  -1 362.400 9.85681   4
  -1   9   1 358.948 11.5355   8
   1  -9   1 361.786 12.4362   8
   1  -9   1 347.940 11.0584   4
   1  -9   1 374.293 10.3157   2
  -1  -9  -1 374.908 10.7313   9
  -1  -9  -1 360.000 10.3848   5
   1  -9   1 361.792 9.42078  10
   1   9   1 348.486 10.4734   5
   1  -9  -1 358.774 9.78276   2
  -1   9  -1 351.717 10.6276   4
  -1   9  -1 355.523 13.4178   1
  -1  -9   1 350.155 13.2486   8
   1   9   1 371.028 13.0147   1
  -1  -9   1 358.393 11.4438   9
  -1  -9   1 357.343 10.3184   5
   1  -9  -1 359.139 11.6812   8
   1  -9  -1 363.790 10.7720   4
   1  -9  -1 361.888 9.29140   5
  -1  -9   1 355.879 11.4755   9
   1  -9  -1 370.985 11.5194   9
   1  -9  -1 351.421 9.98507   2
  -1  -9   1 362.656 9.39925   2
  -1  -9   1 367.843 9.40298   2
  -1   9  -1 349.411 12.1954   8
   1  -9  -1 342.580 11.5569   9
   1   9   1 343.170 12.7228   8
   2  -9   1 0.36766 0.82472   2
  -2  -9  -1 0.60215 1.31698   8
   2  -9   1 0.94894 0.89682   4
  -2   9   1 0.24163 0.78157   8
   2   9  -1 0.36869 0.77836   5
   2   9  -1 -0.1690 1.10817   1
   2  -9   1 0.31006 1.14738   9
   2   9  -1 0.39383 1.24964   8
  -2  -9  -1 -0.8306 0.70736   5
  -2  -9  -1 0.36582 0.87514   3
   2  -9   1 0.06252 0.96407   8
  -2  -9  -1 0.22247 0.63917   9
  -2  -9  -1 0.59033 1.27730   8
   2   9  -1 0.40080 0.46251   4
   2  -9   1 0.24264 0.72901   2
   2  -9   1 0.18670 0.52734  10
  -2  -9  -1 0.13418 0.70968   9
  -2   9   1 -0.1558 1.39477   1
  -2   9  -1 -0.7129 1.30504   1
   2   9   1 0.71759 1.33911   8
  -2   9  -1 0.12965 0.56291   9
   2   9   1 0.06590 0.77633   5
  -2  -9   1 0.19102 0.70715   5
  -2   9  -1 0.46687 0.55554   2
  -2  -9   1 0.15112 0.62425   3
   2  -9  -1 -0.1178 0.57067   2
   2  -9  -1 0.07585 0.99254   9
  -2  -9   1 0.30344 0.89218   9
   2  -9  -1 0.44537 0.81120   4
   2  -9  -1 -0.2874 0.99660   9
  -2  -9   1 0.03417 0.77805   9
   2   9   1 0.08431 1.12884   1
   2  -9  -1 0.25419 0.42115  10
  -2   9  -1 -0.1936 0.70384   4
  -2  -9   1 0.08339 1.25958   8
   2  -9  -1 -0.0574 0.83367   8
  -2   9  -1 0.72262 1.00869   8
   2  -9  -1 1.19329 0.83523   2
   3   9  -1 721.618 18.4325   4
  -3   9   1 723.983 23.1988   1
  -3   9   1 719.688 18.9079   2
   3   9  -1 704.282 20.1728   5
  -3  -9  -1 707.385 23.7033   8
  -3  -9  -1 720.613 20.2294   5
   3  -9   1 729.501 20.8496   8
   3  -9   1 725.845 19.9332   2
   3  -9   1 707.961 18.8058  10
  -3  -9  -1 704.386 19.8380   9
  -3  -9  -1 756.351 19.6287   9
   3   9  -1 725.827 18.5068   4
   3  -9   1 710.762 20.7835   4
  -3   9   1 725.554 19.6503   8
   3   9  -1 720.027 21.2327   1
   3  -9   1 710.442 21.9405   9
  -3  -9   1 684.046 23.7060   8
   3   9   1 706.890 20.2658   5
  -3  -9   1 699.263 20.0959   5
   3  -9  -1 711.082 20.5374   4
  -3  -9   1 702.876 20.6307   9
  -3  -9   1 725.889 18.4140   2
  -3  -9   1 706.614 20.3168   9
  -3  -9   1 719.214 18.2738   2
   3  -9  -1 695.836 18.1935   5
  -3   9  -1 707.481 18.1012   7
   3  -9  -1 705.852 18.6808  10
   3   9   1 727.654 21.1577   1
  -3   9  -1 709.414 20.9598   8
   3  -9  -1 725.849 19.5037   8
   3  -9  -1 701.152 21.5578   9
  -3   9  -1 661.905 18.0943   7
   3  -9  -1 725.103 19.6992   2
  -3   9  -1 672.788 22.8121   1
  -3   9  -1 725.942 22.1923   9
  -3   9  -1 730.154 19.5582   2
  -3   9  -1 690.249 20.3132   4
  -4   9   1 0.26193 0.80396   2
   4  -9   1 0.35458 0.99070   8
   4  -9   1 0.67198 0.74276  10
  -4   9   1 0.28433 0.82399   8
   4  -9   1 0.82798 1.12607   4
   4  -9   1 -0.1470 1.25198   9
  -4   9   1 0.82627 0.87731   2
  -4  -9  -1 0.78685 1.63610   8
   4   9  -1 0.35849 0.99745   1
   4  -9   1 0.12205 0.62501   5
  -4  -9  -1 1.04144 1.11650   5
   4  -9   1 0.22501 0.91335   2
  -4   9   1 -0.1581 1.50024   1
  -4   9   1 1.18491 1.55410   9
  -4  -9  -1 1.11082 1.03278   9
   4   9  -1 0.20626 0.57841   4
  -4  -9  -1 0.73286 0.84801   9
  -4   9   1 0.52516 0.47223   7
  -4   9   1 0.48323 0.46708   7
  -4  -9   1 0.17990 1.03265   9
  -4   9  -1 0.51392 0.63690   7
   4  -9  -1 0.44983 0.60741   5
  -4   9  -1 -0.0645 1.50373   1
  -4  -9   1 -0.2039 0.54359   2
   4  -9  -1 0.89206 0.73869  10
  -4   9  -1 0.70775 0.52074   6
  -4   9  -1 0.43173 1.10362   8
  -4  -9   1 0.16360 1.47174   8
  -4   9  -1 0.61030 1.48670   9
  -4   9  -1 0.09040 0.55073  10
  -4  -9   1 0.30365 0.96842   5
   4   9   1 0.50111 0.97534   1
  -4  -9   1 0.72823 0.67988   2
  -4   9  -1 0.04692 0.95804   2
   4  -9  -1 1.33050 1.41392   9
  -4  -9   1 0.44408 0.93491   9
   4  -9  -1 0.80005 0.78043   8
  -4   9  -1 0.84517 0.91908   2
   4  -9  -1 0.35633 1.02211   4
   4  -9  -1 -0.0543 0.82172   2
  -4   9  -1 1.14984 1.13073   4
  -5   9   1 633.457 21.6884   9
  -5  -9  -1 644.815 18.1373   1
   5  -9   1 635.100 21.5144   9
  -5   9   1 636.078 18.6441   8
  -5   9   1 639.963 17.0985   7
  -5   9   1 613.637 21.3102   9
  -5  -9  -1 629.791 16.8513   2
  -5   9   1 664.535 16.8423  10
  -5  -9  -1 665.469 19.1381   9
  -5  -9  -1 608.605 17.0095   2
  -5   9   1 662.117 21.9621   1
   5   9  -1 660.814 18.2941   1
   5  -9   1 635.785 19.9632   4
   5  -9   1 651.258 19.0143   2
  -5  -9  -1 650.789 19.2995   9
   5  -9   1 627.040 17.5154   5
   5  -9   1 669.608 19.4929   8
  -5   9   1 653.064 18.7025   2
   5  -9   1 640.534 17.5976  10
  -5  -9  -1 635.742 23.5328   8
  -5  -9  -1 628.548 19.3721   5
  -5  -9   1 617.216 17.3563   2
   5  -9  -1 618.912 19.7573   4
  -5   9  -1 626.253 18.9107   2
   5   9   1 639.870 18.0396   1
  -5   9  -1 631.557 21.6635   9
  -5   9  -1 622.378 19.7924   8
  -5  -9   1 625.284 19.4607   9
   5  -9  -1 646.926 18.1851   8
  -5   9  -1 624.471 17.4061   5
  -5  -9   1 635.436 19.8224   9
  -5  -9   1 623.376 19.8525   1
  -5  -9   1 661.267 16.2141  10
   5  -9  -1 615.673 17.4516   5
  -5   9  -1 621.071 21.6523   1
  -5   9  -1 616.973 19.5248   4
  -5  -9   1 630.548 19.3961   5
  -5   9  -1 634.743 16.8223   6
   5  -9  -1 609.368 21.0506   9
   5  -9  -1 609.873 17.3961  10
  -5   9  -1 626.732 17.3375   7
  -5  -9   1 620.979 17.6777   2
   5  -9  -1 637.499 18.8056   2
  -5   9  -1 634.696 17.2491  10
  -5  -9   1 594.147 23.2084   8
   6  -9   1 -0.5373 0.96600   5
   6  -9   1 0.08838 1.25977   2
  -6  -9  -1 -0.0225 0.84141   2
  -6   9   1 -0.3368 1.12566   8
  -6  -9  -1 0.27825 1.99690   8
  -6   9   1 -1.0831 0.72872  10
   6  -9   1 0.32945 1.39556   4
   6  -9   1 0.62991 1.24940   8
  -6   9   1 0.11207 0.84052   7
  -6  -9  -1 -0.1560 1.22233   9
   6  -9   1 -0.8481 1.62395   9
  -6   9   1 -0.3613 1.66267   1
  -6  -9  -1 -1.0447 1.25624   5
   6  -9   1 0.42622 0.97762  10
   6  -9  -1 0.94289 1.36415   2
  -6   9  -1 0.43648 0.94366   7
  -6   9  -1 0.21973 0.85309  10
  -6  -9   1 -0.7785 1.92515   8
  -6  -9   1 -0.9657 1.29081   5
  -6   9  -1 -1.1692 1.59971   1
  -6  -9   1 0.55065 1.32884   9
  -6   9  -1 -0.3524 0.92967   5
  -6  -9   1 -0.2204 0.90971   2
   6  -9  -1 -0.1864 0.87627  10
  -6   9  -1 -0.0965 1.24822   2
   6  -9  -1 -0.3876 1.30646   4
  -6  -9   1 0.19441 0.78579   7
   6  -9  -1 -0.2227 0.92901   5
  -6  -9   1 0.15392 0.74637  10
   6  -9  -1 -0.4837 1.60690   9
   6  -9  -1 0.51500 1.08234   8
  -7  -9  -1 337.397 17.1035   8
  -7  -9  -1 349.917 10.0159  10
  -7  -9  -1 341.866 13.2893   5
   7  -9   1 353.425 13.2093   8
  -7   9   1 343.522 10.9949   7
   7  -9   1 340.664 15.3405   9
   7  -9   1 342.773 11.0539  10
  -7  -9  -1 354.508 13.4764   9
  -7   9   1 342.494 14.6846   1
  -7  -9  -1 338.488 11.3377   2
  -7   9   1 335.036 10.6680  10
   7  -9   1 326.799 12.5109   2
   7  -9  -1 349.803 15.3370   9
  -7  -9   1 326.522 10.3909  10
  -7  -9   1 349.284 13.3822   5
   7  -9  -1 357.600 12.6793   2
   7  -9  -1 351.313 11.0878  10
   7  -9  -1 337.643 13.7634   4
  -7  -9   1 355.421 11.7905   2
  -7  -9   1 362.559 13.9420   9
  -7   9  -1 372.805 11.1331  10
  -7   9  -1 370.001 15.2952   5
  -7  -9   1 357.927 17.5901   8
  -7   9  -1 359.234 11.2238   7
  -7   9  -1 363.012 14.9787   1
  -8   9   1 0.30331 1.10918  10
   8  -9   1 0.62486 1.22930  10
  -8   9   1 0.76755 1.25856   7
  -8  -9  -1 0.38750 2.50694   8
  -8  -9  -1 0.51326 1.07279  10
  -8  -9  -1 -0.1607 1.28576   2
  -8  -9  -1 0.31749 1.75697   9
  -8   9   1 0.03777 2.07717   1
  -8  -9   1 1.20759 1.45705   2
  -8   9  -1 0.44223 2.10548   1
  -8   9  -1 0.64985 1.26058   7
  -8   9  -1 -0.0130 1.10919  10
  -8  -9   1 1.21819 1.93354   9
  -8  -9   1 0.49162 2.65886   8
  -8  -9   1 1.04351 1.17274  10
   8  -9  -1 -0.1541 1.54729   2
  -9   9   1 285.191 10.1510   7
  -9   9   1 276.575 9.68492  10
  -9  -9  -1 275.066 13.2039   9
  -9  -9  -1 290.904 11.0015   2
  -9  -9  -1 275.115 9.52050  10
   9  -9   1 277.585 9.67662  10
  -9  -9   1 285.636 9.84837  10
  -9  -9   1 282.013 11.0931   2
   9  -9  -1 276.660 9.78316  10
  -9   9  -1 274.357 9.87361  10
  -9  -9   1 285.382 13.4247   9
  -9   9  -1 287.322 10.2606   7
 -10   9   1 -1.1397 1.33666   7
 -10  -9  -1 0.35647 1.66380   2
 -10  -9  -1 0.06821 2.38003   9
 -10  -9  -1 -0.7685 1.38266  10
 -10  -9   1 -0.6636 1.43755  10
 -10  -9   1 -0.2339 2.32212   9
 -10   9  -1 -1.5820 1.17279  10
  10  -9  -1 -0.8718 1.35873  10
 -10  -9   1 -0.8961 1.47563   2
 -10   9  -1 -2.2009 1.30585   7
   0  10   1 7.22249 1.85306   8
   0  10  -1 6.71806 0.90824   5
   0 -10  -1 7.82807 0.98995   5
   0 -10   1 5.57707 1.64987   9
   0 -10   1 6.38022 1.97187   8
   0 -10   1 5.36755 0.94011   2
   0 -10  -1 6.36666 1.12527   4
   0 -10   1 7.25811 1.64296   9
   0 -10  -1 7.57581 1.62357   9
   0  10  -1 9.04020 2.39381   1
   0 -10  -1 9.69776 1.66994   9
   0 -10   1 8.91405 1.07459   2
   0  10   1 8.04148 2.30967   1
   0  10  -1 6.73836 1.09139   4
   0 -10  -1 5.04000 1.63647   8
   0  10  -1 5.09423 1.79832   8
   0 -10   1 7.08090 1.44291   4
  -1 -10  -1 88.2160 5.64465   8
   1  10  -1 94.2914 3.19528   4
  -1 -10  -1 103.994 4.28207   9
   1 -10   1 74.5273 3.45598   2
  -1  10   1 86.2120 5.99842   1
   1 -10   1 94.2358 4.40999   4
   1 -10   1 93.6564 3.93038   2
   1  10  -1 74.1298 5.32887   1
   1 -10   1 83.3458 3.18027   7
   1 -10   1 91.8939 2.86711  10
   1  10  -1 106.055 6.17453   8
  -1 -10  -1 87.5726 3.53698   4
  -1  10   1 98.2463 4.84084   8
   1 -10   1 83.1197 5.18450   8
   1 -10   1 103.133 5.36352   9
   1  10  -1 95.2424 3.72299   5
  -1 -10  -1 92.0596 3.70536   5
  -1 -10  -1 104.337 4.87530   3
   1  10   1 96.9030 3.90302   5
   1 -10  -1 87.1021 3.22885   2
  -1 -10   1 86.6887 3.60120   5
  -1  10  -1 80.0177 4.99790   8
   1 -10  -1 82.9007 4.69150   8
   1  10   1 90.2115 5.71612   1
  -1  10  -1 101.869 4.05398   4
  -1 -10   1 95.7168 4.75344   9
   1 -10  -1 92.5957 4.07975   4
   1 -10  -1 89.2727 3.43644   2
  -1 -10   1 96.2800 2.97519   2
   1 -10  -1 93.8203 2.72361   5
  -1 -10   1 74.0094 2.83561   2
  -1 -10   1 84.0671 5.76879   8
   1 -10  -1 104.285 5.02184   9
   2  10  -1 109.276 4.59159   5
  -2 -10  -1 107.111 5.10695   3
   2 -10   1 107.656 5.84257   9
   2 -10   1 107.655 4.46469   2
  -2 -10  -1 104.617 6.70118   8
   2 -10   1 106.471 5.64072   8
   2 -10   1 103.976 5.05937   4
  -2  10   1 105.640 4.82734   8
   2 -10   1 104.652 4.73545   2
   2  10  -1 104.700 3.33605   4
   2 -10   1 105.770 3.68459  10
  -2 -10  -1 103.570 4.34292   9
  -2  10   1 102.225 6.64162   1
  -2 -10  -1 106.324 4.53782   9
   2  10  -1 115.762 6.26111   1
  -2 -10  -1 105.689 4.56828   5
  -2 -10  -1 103.424 6.37305   8
  -2  10  -1 108.328 6.80078   1
   2  10   1 107.185 4.70344   5
   2 -10  -1 109.435 3.48353  10
  -2 -10   1 103.838 5.00006   9
  -2  10  -1 106.071 4.71853   4
  -2  10  -1 113.847 5.69301   8
  -2 -10   1 111.899 4.32962   3
   2 -10  -1 107.303 4.96661   8
  -2  10  -1 95.7359 8.01861   9
   2 -10  -1 110.904 5.72297   9
   2 -10  -1 114.533 4.28627   2
   2 -10  -1 107.666 5.67867   9
  -2 -10   1 114.314 5.27962   9
   2  10   1 104.905 6.00324   1
  -2  10  -1 112.174 3.74751   2
   2 -10  -1 114.012 4.99256   4
   2 -10  -1 113.511 5.67046   9
   2  10   1 106.708 6.71156   8
  -2 -10   1 118.315 4.70355   5
  -2 -10   1 115.602 3.28640   2
  -2 -10   1 113.911 7.12604   8
   2 -10  -1 108.748 4.53821   2
  -2 -10   1 118.013 3.33963   2
  -3  10   1 19.4751 1.95680   8
  -3  10   1 15.1862 1.29632   2
  -3 -10  -1 20.5761 3.88477   8
   3  10  -1 22.2707 1.14153   4
   3 -10   1 21.3647 2.51398   8
  -3  10   1 20.0669 2.91192   9
  -3 -10  -1 20.2329 2.23715   5
  -3 -10  -1 25.9762 2.06394   9
  -3 -10  -1 15.4572 1.96324   9
   3 -10   1 18.5613 2.52221   4
   3 -10   1 11.5572 2.56633   9
   3  10  -1 17.9230 1.09013   4
   3 -10   1 15.8467 2.08079   2
   3  10  -1 22.5361 2.23990   5
   3 -10   1 18.3705 1.55141  10
   3  10  -1 15.8518 2.54514   1
  -3  10   1 16.3544 3.11539   1
   3 -10  -1 21.2882 1.50235  10
   3  10   1 20.9084 2.34423   5
   3 -10  -1 16.5357 1.87558   2
  -3 -10   1 17.0700 1.26004   2
  -3  10  -1 13.4523 2.94754   1
  -3 -10   1 19.1429 3.75961   8
  -3 -10   1 19.1297 2.12035   5
  -3 -10   1 18.0903 1.20040   2
  -3  10  -1 18.6781 2.45013   8
  -3  10  -1 17.5956 1.73713   2
  -3  10  -1 23.0553 3.43259   9
   3  10   1 18.8913 2.64372   1
   3 -10  -1 16.8602 2.81047   9
   3 -10  -1 23.4338 2.07968   8
  -3 -10   1 24.2485 1.88985   3
  -3 -10   1 22.9282 2.35050   9
  -3 -10   1 15.9343 2.28822   9
   3 -10  -1 20.0223 2.34676   4
  -3  10  -1 21.4549 2.31883   4
   4  10  -1 359.846 12.4866   1
  -4 -10  -1 362.060 11.9207   9
  -4  10   1 354.379 13.9316   9
   4 -10   1 372.545 14.0841   9
   4 -10   1 351.717 12.6443   4
  -4  10   1 359.102 10.9821   2
  -4  10   1 367.159 14.8654   1
  -4  10   1 363.596 11.2835   8
  -4 -10  -1 348.438 11.4987   9
   4 -10   1 353.284 10.6267  10
   4 -10   1 354.135 11.7869   2
   4 -10   1 345.611 12.1525   8
  -4 -10  -1 367.812 12.2012   5
  -4 -10  -1 363.422 15.7187   8
   4  10  -1 354.704 9.93369   4
   4  10  -1 347.295 9.85905   4
  -4  10  -1 360.777 10.0792   7
  -4 -10   1 385.607 12.3044   5
  -4  10  -1 362.152 12.3258   4
  -4  10  -1 370.514 9.63393  10
   4 -10  -1 368.028 10.5838  10
  -4  10  -1 378.562 12.7607   8
  -4 -10   1 356.660 15.7376   8
   4 -10  -1 361.864 13.6997   9
  -4  10  -1 385.830 15.0796   1
   4 -10  -1 365.620 12.5805   4
  -4 -10   1 360.053 10.4410   2
  -4  10  -1 366.371 14.1533   9
   4 -10  -1 356.482 10.0758   5
   4  10   1 356.788 12.3034   1
  -4 -10   1 371.649 10.2493   2
   4 -10  -1 367.703 11.6863   2
  -4 -10   1 352.866 12.1411   9
  -4  10  -1 364.794 9.98634   7
  -4 -10   1 387.388 12.7926   9
  -4  10  -1 356.836 11.4274   2
   4 -10  -1 362.057 10.9778   8
   5 -10   1 59.7926 4.55569   4
  -5 -10  -1 58.7696 6.20291   8
  -5 -10  -1 44.6050 2.34346   2
  -5  10   1 56.1157 5.39029   1
   5 -10   1 41.3144 3.51948   2
   5 -10   1 58.7135 2.93092   5
  -5  10   1 58.1663 2.46387   7
  -5 -10  -1 52.1825 4.08830   5
   5 -10   1 53.8164 3.07177  10
   5  10  -1 58.0022 3.73949   1
  -5 -10  -1 56.9031 4.00459   9
  -5  10  -1 45.9565 5.02288   1
  -5  10  -1 55.5912 4.27358   8
   5 -10  -1 43.6537 3.50059   2
  -5  10  -1 49.8108 4.12893   2
  -5 -10   1 56.7762 4.29293   9
  -5 -10   1 59.3442 6.32398   8
  -5  10  -1 51.0875 2.55982  10
   5 -10  -1 60.9299 3.09372  10
  -5 -10   1 52.1733 4.07565   5
   5 -10  -1 57.3470 4.40939   4
   5 -10  -1 60.7000 2.94357   5
  -5  10  -1 63.2451 4.42345   4
   5 -10  -1 43.2347 4.65514   9
  -5 -10   1 63.5245 2.65360   7
  -5  10  -1 56.5412 2.75653   7
  -5 -10   1 49.5850 3.00776   2
  -5  10  -1 52.0459 4.14295   2
   6 -10   1 108.005 7.71551   9
  -6 -10  -1 107.133 6.12897   9
   6 -10   1 118.653 6.15268   2
  -6 -10  -1 118.355 6.46640   5
   6 -10   1 116.377 4.99749  10
   6 -10   1 108.378 5.98595   8
  -6  10   1 115.989 7.95870   1
  -6  10   1 115.011 4.47077   7
   6 -10   1 112.400 6.75757   4
  -6 -10  -1 114.870 9.11392   8
  -6 -10  -1 119.458 4.86041   2
  -6 -10   1 111.209 6.52819   9
  -6 -10   1 112.169 9.10953   8
  -6  10  -1 101.755 7.60433   1
  -6 -10   1 110.565 4.03464  10
   6 -10  -1 116.665 6.83432   8
   6 -10  -1 109.593 6.60839   4
   6 -10  -1 123.985 6.16010   2
  -6 -10   1 113.575 6.41554   5
  -6  10  -1 110.212 4.67562   7
   6 -10  -1 117.948 7.84123   9
  -6  10  -1 114.915 4.58107  10
  -6 -10   1 110.869 5.12256   2
   6 -10  -1 112.502 4.88174  10
  -7 -10  -1 2.04153 1.25658   2
   7 -10   1 2.92674 1.83800   2
   7 -10   1 2.22699 1.37761  10
  -7 -10  -1 2.76905 2.63743   8
  -7 -10  -1 3.21185 1.98724   5
  -7  10   1 3.83835 1.30627   7
  -7 -10  -1 3.31596 1.86399   9
   7 -10   1 2.23302 2.52117   9
  -7  10   1 3.95916 2.48687   1
   7 -10  -1 2.74658 1.37237  10
   7 -10  -1 1.81441 1.60637   2
  -7 -10   1 2.72061 2.80782   8
  -7 -10   1 2.39822 1.08034  10
  -7 -10   1 0.37198 1.64302   5
  -7  10  -1 2.62589 2.31980   1
  -7 -10   1 2.62177 1.48652   2
  -7 -10   1 4.41093 2.07745   9
   7 -10  -1 1.53751 2.13571   9
  -7  10  -1 3.95995 1.39213   7
  -7  10  -1 3.60409 1.29301  10
  -8  10   1 206.603 11.4388   1
  -8 -10  -1 207.936 10.4291   9
  -8 -10  -1 219.424 8.65640   2
   8 -10   1 212.006 8.04443  10
  -8  10   1 208.284 7.84604   7
  -8 -10  -1 203.267 13.8668   8
  -8 -10  -1 208.959 7.26541  10
   8 -10  -1 223.640 8.20979  10
  -8  10  -1 229.050 8.24591   7
  -8 -10   1 213.719 10.7157   9
  -8 -10   1 231.552 14.6993   8
  -8  10  -1 228.665 8.01710  10
  -8 -10   1 229.155 9.01702   2
  -8  10  -1 221.447 11.7113   1
   8 -10  -1 224.117 9.78554   2
  -8 -10   1 200.016 7.46421  10
  -9 -10  -1 5.04742 1.61398  10
  -9  10   1 3.25794 1.60618   7
   9 -10   1 3.19967 1.59203  10
  -9 -10  -1 2.78723 2.32692   9
  -9 -10  -1 2.94722 1.89183   2
  -9  10  -1 4.22778 1.75200  10
  -9 -10   1 3.66630 1.59026  10
   9 -10  -1 2.24591 1.59239  10
  -9 -10   1 3.60481 2.47217   9
  -9  10  -1 2.57898 1.63796   7
  -9 -10   1 2.85352 1.87827   2
 -10 -10  -1 23.6595 3.69856   2
 -10 -10  -1 24.8041 5.16126   9
 -10 -10  -1 24.5500 3.14504  10
 -10  10   1 21.8122 3.02927   7
 -10 -10   1 27.7014 5.33480   9
 -10 -10   1 29.7145 3.44953  10
  10 -10  -1 25.2996 3.07804  10
 -10  10  -1 28.4813 3.60843   7
 -10 -10   1 29.5495 4.09718   2
   0 -11  -1 -0.1761 1.08460   8
   0 -11  -1 -0.4737 0.63407   4
   0 -11  -1 0.37009 0.98808   9
   0  11   1 -0.4049 1.37467   1
   0 -11  -1 -0.2892 0.48083   5
   0  11  -1 0.10238 1.29333   1
   0 -11  -1 -0.2582 0.79691   9
   0 -11   1 -0.2793 0.53442   2
   0  11   1 -0.1513 1.06576   8
   0  11  -1 -0.4984 1.10128   8
   0 -11   1 -0.1455 0.98121   9
   0 -11   1 0.09601 0.60207   2
   0  11  -1 -0.2170 0.50336   5
   0 -11   1 -0.5652 0.72747   4
   0  11  -1 0.15775 0.59919   4
   0 -11   1 -0.4827 1.05518   9
   0 -11   1 0.05026 1.20993   8
   1 -11   1 1850.27 50.3336   9
   1 -11   1 1907.14 50.2158   9
  -1 -11  -1 1877.76 47.7870   4
  -1  11   1 1859.23 52.5173   1
  -1 -11  -1 1895.75 48.7942   9
   1 -11   1 1846.55 46.6870  10
   1 -11   1 1879.45 47.7909   2
   1 -11   1 1826.09 47.1685   7
   1  11  -1 1877.77 47.8141   5
  -1 -11  -1 1820.56 48.4659   9
   1  11  -1 1869.64 51.9049   8
   1  11  -1 1859.93 51.8262   1
  -1 -11  -1 1856.19 51.7534   8
   1  11  -1 1913.10 46.9809   4
   1 -11   1 1869.73 48.9539   4
  -1 -11  -1 1866.51 47.8334   5
   1 -11   1 1808.90 50.7769   8
  -1 -11  -1 1929.57 51.1856   8
  -1  11   1 1843.71 49.7453   8
   1 -11   1 1902.54 48.1971   2
  -1 -11  -1 1861.68 49.5926   3
  -1 -11   1 1956.04 46.9393   2
   1 -11  -1 1865.44 48.4927   4
   1  11   1 1926.07 51.9584   1
   1 -11  -1 1914.43 49.8103   9
  -1 -11   1 1914.78 46.9577   2
  -1 -11   1 1899.12 49.7058   9
   1 -11  -1 1873.63 47.5523   2
   1  11   1 1869.60 48.0078   5
  -1  11  -1 1849.97 52.4809   1
  -1  11  -1 1908.30 50.7462   8
  -1 -11   1 1931.54 47.8000   5
   1 -11  -1 1914.44 50.1162   8
   1 -11  -1 1894.31 49.5295   9
   1  11   1 1915.51 51.5952   8
   1 -11  -1 1912.64 47.2838   2
  -1  11  -1 1874.54 48.0865   4
  -1 -11   1 1924.46 49.5998   9
  -1 -11   1 1872.48 52.2401   8
  -2 -11  -1 0.74095 0.79533   9
   2 -11   1 0.40118 1.19192   9
   2 -11   1 -0.0839 0.86302   4
  -2 -11  -1 0.58943 1.42157   8
  -2 -11  -1 0.90012 0.97002   3
  -2 -11  -1 0.90691 0.82673   5
   2 -11   1 1.16570 0.90149   2
  -2  11   1 0.02906 0.85370   8
   2 -11   1 -0.1928 0.49862  10
   2 -11   1 0.28047 0.77504   2
  -2  11   1 0.20846 1.41152   1
  -2 -11  -1 0.03669 0.80809   9
   2  11  -1 0.58278 1.31868   1
   2 -11   1 -0.3308 0.80495   2
   2  11  -1 -0.0735 0.73956   5
   2 -11   1 -0.2648 1.09695   8
  -2 -11   1 0.38271 1.47784   8
  -2  11  -1 -0.0499 0.96894   8
  -2 -11   1 -0.1189 0.38480   2
   2 -11  -1 -0.1185 1.10265   9
  -2  11  -1 0.22453 1.51257   1
   2  11   1 -0.2013 0.82116   5
  -2 -11   1 0.17311 0.43296   2
   2  11   1 0.32440 1.25753   1
   2 -11  -1 0.09754 1.05108   9
   2 -11  -1 0.27630 0.87874   4
   2 -11  -1 0.15427 1.06899   9
   2 -11  -1 0.37405 0.78294   2
   2 -11  -1 1.22038 1.05578   8
  -2 -11   1 -0.3141 0.84543   9
  -2 -11   1 -0.6118 0.67758   5
  -2  11  -1 -0.2962 0.76723   4
   2 -11  -1 0.21978 0.67595   2
   2 -11  -1 0.95849 0.81413   2
  -2 -11   1 0.01141 0.82755   9
  -2 -11   1 0.28054 0.68687   3
   2 -11  -1 0.38191 0.42967  10
   3 -11   1 342.367 11.8964   4
   3  11  -1 339.539 12.7340   1
   3  11  -1 335.418 11.1672   5
  -3  11   1 332.359 14.2333   1
  -3 -11  -1 331.800 11.1099   5
  -3 -11  -1 349.975 11.1191   9
  -3 -11  -1 340.178 10.7433   9
   3 -11   1 342.044 13.0466   9
   3 -11   1 342.849 10.9569   2
   3 -11   1 343.850 9.86093  10
  -3 -11  -1 346.225 11.6104   3
   3 -11   1 348.432 12.0381   8
  -3 -11  -1 344.961 14.7502   8
  -3  11   1 353.691 10.9481   8
   3 -11  -1 345.474 10.7701   2
  -3 -11   1 343.118 14.8558   8
   3  11   1 345.627 12.7208   1
   3 -11  -1 352.802 11.7726   4
   3 -11  -1 341.104 9.70635  10
   3 -11  -1 334.979 10.7611   8
  -3 -11   1 349.207 11.8902   9
  -3 -11   1 342.667 11.1807   5
  -3  11  -1 349.908 12.1795   8
  -3 -11   1 334.821 9.38229   2
  -3 -11   1 343.505 10.2768   3
   3  11   1 347.097 11.3499   5
  -3 -11   1 344.220 9.29690   2
  -3  11  -1 280.606 12.3343   9
  -3 -11   1 338.014 11.5312   9
  -3  11  -1 339.762 14.3474   1
   3 -11  -1 345.833 12.8225   9
  -3  11  -1 336.889 9.89761   2
   4 -11   1 0.41606 1.11715   8
  -4 -11  -1 0.46787 0.97422   9
  -4  11   1 0.02348 1.76108   1
   4 -11   1 0.70333 0.77920  10
  -4  11   1 0.22007 0.84381   8
  -4 -11  -1 0.25618 0.90676   9
   4 -11   1 0.76679 1.10179   2
   4 -11   1 0.34072 1.20332   4
   4 -11   1 -0.2832 1.37496   9
  -4 -11  -1 -0.5426 1.01028   5
   4  11  -1 -0.0164 1.14138   1
  -4 -11  -1 -0.4111 1.53568   8
   4 -11  -1 0.59462 0.54874   5
   4 -11  -1 0.29507 0.94422   2
  -4  11  -1 0.27668 1.54073   1
   4 -11  -1 -0.4484 1.05007   4
  -4 -11   1 0.42892 0.59062   2
  -4 -11   1 1.26387 1.93350   8
  -4 -11   1 0.85073 0.86064   3
  -4 -11   1 0.05774 0.98873   5
   4  11   1 -0.0363 1.11538   1
  -4 -11   1 0.73689 1.12236   9
  -4 -11   1 0.15113 0.65498   2
  -4  11  -1 0.07921 1.07067   4
   4 -11  -1 0.16413 1.35804   9
  -4 -11   1 0.02562 1.00679   9
   4 -11  -1 -0.0034 0.75861   8
  -4  11  -1 0.12573 1.08474   8
   4 -11  -1 0.75575 0.73278  10
  -5 -11  -1 167.198 10.8687   8
  -5 -11  -1 165.729 5.60932   2
   5 -11   1 183.699 7.80518   8
  -5  11   1 170.913 9.97540   1
  -5 -11  -1 173.266 7.92777   5
  -5 -11  -1 180.900 7.83411   9
  -5 -11  -1 168.377 5.77071   2
   5  11  -1 178.597 7.69516   1
   5 -11   1 176.192 6.05438   5
   5 -11   1 171.920 8.38438   4
   5 -11   1 157.621 9.24618   9
   5 -11   1 164.021 7.50806   2
  -5 -11  -1 177.617 7.64006   9
   5 -11   1 177.303 6.56018  10
   5 -11  -1 205.299 6.64767  10
   5 -11  -1 188.724 9.75133   9
   5 -11  -1 185.406 7.64552   2
  -5 -11   1 187.503 6.58573   2
  -5 -11   1 187.892 8.14088   5
  -5  11  -1 193.348 10.4618   1
   5 -11  -1 208.244 6.92652   8
   5 -11  -1 189.575 6.12701   5
   5  11   1 199.481 7.81668   1
   5 -11  -1 187.850 8.54816   4
  -5 -11   1 193.850 11.6352   8
  -5 -11   1 198.062 8.58353   9
  -5  11  -1 200.856 5.95834   7
  -6 -11  -1 -0.7076 1.33676   5
  -6 -11  -1 -0.0367 0.89157   2
  -6 -11  -1 1.09007 2.25734   8
  -6  11   1 0.70007 2.10666   1
   6 -11   1 -0.7926 1.84076   9
  -6  11   1 0.62938 0.74728   7
   6 -11   1 0.44137 2.49577   4
   6 -11   1 0.74324 1.41981   8
  -6 -11  -1 0.38556 1.30520   9
   6 -11   1 -0.3129 1.34755   2
   6 -11   1 1.08000 1.07909  10
  -6 -11   1 0.47124 1.40393   5
  -6  11  -1 0.31950 0.84162   7
  -6 -11   1 1.22499 1.51776   9
   6 -11  -1 0.28030 1.01441  10
   6 -11  -1 -0.5230 1.26395   2
  -6 -11   1 0.69686 0.73777  10
  -6 -11   1 0.88814 1.07131   2
  -6  11  -1 -0.7734 1.84050   1
   6 -11  -1 -0.4945 1.79964   9
  -6 -11   1 -0.1287 2.16620   8
  -7 -11  -1 41.4243 6.33598   8
   7 -11   1 37.4870 5.39881   9
  -7  11   1 41.4101 5.23096   1
  -7  11   1 44.1566 2.67264   7
  -7 -11  -1 46.3255 4.37004   9
  -7 -11  -1 44.6423 3.23905   2
   7 -11   1 44.8175 3.29179  10
   7 -11   1 42.5357 4.17742   2
  -7 -11  -1 46.0359 4.46646   5
  -7 -11   1 42.2474 6.51425   8
   7 -11  -1 41.3140 3.17587  10
  -7 -11   1 38.7806 3.29514   2
  -7  11  -1 37.4568 5.15497   1
  -7  11  -1 40.2037 2.84592   7
  -7 -11   1 42.6568 2.57766  10
   7 -11  -1 36.0265 5.27317   9
   7 -11  -1 30.6789 3.67205   2
  -7 -11   1 34.2862 3.99937   5
  -7 -11   1 44.9802 4.55533   9
  -8 -11  -1 1.23120 1.83524   9
  -8 -11  -1 0.47386 1.33131   2
  -8  11   1 0.40876 1.06586   7
   8 -11   1 0.19241 1.36942  10
   8 -11   1 -1.2784 2.23938   2
  -8  11   1 0.83226 2.40484   1
   8 -11  -1 1.25559 1.80096   2
  -8 -11   1 0.97712 1.15871  10
  -8  11  -1 0.57169 1.16714   7
  -8  11  -1 -0.8904 2.20724   1
  -8 -11   1 0.47506 1.39148   2
  -8 -11   1 -0.9510 1.66453   9
   8 -11  -1 0.23508 1.32376  10
   9 -11   1 252.930 9.35820  10
  -9 -11  -1 259.702 10.2892   2
  -9  11   1 270.087 9.17178   7
  -9 -11  -1 266.135 12.6135   9
  -9 -11  -1 248.961 8.74339  10
  -9 -11   1 250.498 8.99658  10
   9 -11  -1 234.768 9.23335  10
  -9  11  -1 259.109 9.36066   7
  -9 -11   1 245.190 12.5073   9
  -9 -11   1 255.912 10.4826   2
 -10 -11  -1 0.99910 1.78740   2
 -10 -11  -1 0.02129 2.16820   9
  10 -11   1 -0.3702 1.50043  10
 -10 -11  -1 -0.0572 1.48368  10
 -10  11   1 0.64111 1.43854   7
  10 -11  -1 0.11290 1.49025  10
 -10 -11   1 -0.5285 1.49061  10
 -10  11  -1 -0.6382 1.30433   7
 -10 -11   1 0.08001 1.83385   2
 -10 -11   1 1.39548 2.42811   9
   0 -12  -1 31.0901 2.69718   9
   0 -12   1 28.2827 3.55694   8
   0 -12   1 31.2254 2.57544   4
   0  12  -1 30.9699 1.89214   4
   0 -12  -1 33.9506 2.37128   4
   0 -12  -1 30.7257 2.88087   9
   0 -12   1 29.2974 3.11668   9
   0 -12   1 28.4054 1.93873   2
   0 -12  -1 28.1767 1.71229   5
   0 -12   1 29.5068 1.86265   2
   0 -12  -1 29.8624 3.44982   8
   0  12   1 31.6996 4.05340   1
   0  12  -1 26.7878 1.66692   5
   0  12  -1 25.6568 3.37034   8
   0  12   1 31.6708 3.35471   8
   0  12  -1 27.5772 3.71886   1
   0 -12   1 32.3207 3.13842   9
   1 -12   1 30.6081 3.28925   9
   1 -12   1 19.9749 1.84309   2
  -1 -12  -1 30.3566 2.90391   3
  -1 -12  -1 20.3326 2.26401   9
  -1 -12  -1 30.4814 2.64488   9
   1 -12   1 27.7134 1.34832  10
   1  12  -1 28.8864 2.04866   5
  -1 -12  -1 34.8684 3.62288   8
   1 -12   1 26.6084 1.67931   7
  -1  12   1 30.2337 3.00624   8
  -1  12   1 26.5821 3.90318   1
   1 -12   1 26.2836 3.28927   8
  -1 -12  -1 26.6685 3.55293   8
   1 -12   1 20.2026 2.73562   9
   1 -12   1 27.4701 2.23313   2
  -1 -12  -1 26.2639 1.95583   5
   1 -12   1 25.7719 2.52521   4
   1  12  -1 30.2117 1.43103   4
  -1 -12  -1 27.7435 2.05706   4
  -1 -12   1 26.5678 1.92365   5
   1 -12  -1 19.4833 2.51625   9
  -1 -12   1 29.4668 1.61833   2
   1 -12  -1 25.2736 1.89392   2
  -1 -12   1 27.8891 2.89064   9
  -1  12  -1 30.2160 3.36088   8
   1 -12  -1 27.3598 2.37370   4
   1 -12  -1 32.9752 3.11906   9
  -1  12  -1 21.1297 3.76647   1
  -1 -12   1 24.6007 3.66712   8
   1 -12  -1 22.8450 1.62846   2
   1 -12  -1 27.0034 3.01626   8
   1  12   1 26.3307 3.64382   1
   1  12   1 30.0907 2.18570   5
  -1 -12   1 22.3127 1.48340   2
  -1  12  -1 31.4218 2.21421   4
   1  12   1 35.0738 3.83372   8
  -1 -12   1 21.0784 2.56437   9
   2 -12   1 969.365 25.7712   2
  -2 -12  -1 919.135 26.3026   3
   2 -12   1 942.125 27.5529   8
   2 -12   1 928.489 25.2589   2
   2 -12   1 959.520 25.7930   2
   2  12  -1 900.277 25.2859   5
  -2  12   1 910.046 26.1606   8
  -2 -12  -1 933.334 25.6502   9
   2  12  -1 949.268 28.7430   1
   2 -12   1 946.572 26.4431   4
   2 -12   1 939.580 24.0666  10
  -2 -12  -1 947.499 25.3807   5
  -2  12   1 919.691 29.7841   1
  -2 -12  -1 973.076 29.9041   8
   2 -12   1 969.203 27.9336   9
  -2 -12  -1 956.288 25.7599   9
   2 -12  -1 913.686 23.7415  10
   2 -12  -1 912.510 25.2396   2
  -2 -12   1 922.854 23.6951   2
   2 -12  -1 948.969 27.3417   9
   2 -12  -1 898.932 27.1904   9
   2 -12  -1 898.630 27.2732   9
  -2 -12   1 941.418 25.3153   5
  -2 -12   1 967.159 23.8003   2
   2  12   1 878.384 25.3864   5
   2 -12  -1 937.795 26.0775   4
  -2 -12   1 908.321 29.7840   8
  -2  12  -1 918.352 25.5212   4
   2 -12  -1 910.551 25.2967   2
  -2  12  -1 952.240 27.4342   8
   2  12   1 953.534 28.6833   1
  -2  12  -1 929.381 29.8722   1
   2 -12  -1 945.388 24.8963   2
   2 -12  -1 939.046 26.5061   8
  -2 -12   1 943.181 26.6744   9
  -2 -12   1 913.490 26.4706   9
   3  12  -1 19.9345 3.04464   1
  -3 -12  -1 23.2482 2.53682   3
   3 -12   1 12.2014 2.83711   9
  -3  12   1 17.6238 2.08588   8
  -3 -12  -1 19.9969 2.49687   5
   3 -12   1 22.4833 2.78218   8
  -3 -12  -1 19.4928 4.00483   8
   3 -12   1 19.1589 1.64589  10
  -3 -12  -1 13.7950 2.03913   9
  -3  12   1 17.2275 3.75767   1
   3 -12   1 18.9476 2.79313   4
  -3 -12  -1 24.6946 2.25622   9
   3 -12   1 15.2531 2.12713   2
   3  12  -1 20.2662 2.27394   5
   3 -12  -1 20.4537 2.23460   8
  -3  12  -1 17.8294 2.60616   8
   3 -12  -1 19.8682 2.49485   4
  -3 -12   1 15.1217 1.31928   2
  -3 -12   1 23.0795 4.65031   8
   3 -12  -1 15.3858 1.91778   2
   3  12   1 16.6777 3.05868   1
  -3 -12   1 18.9218 1.30235   2
  -3  12  -1 21.0234 2.38164   4
   3 -12  -1 10.6049 2.52105   9
  -3 -12   1 20.6545 2.51976   9
  -3  12  -1 17.3226 3.65537   1
   3  12   1 18.5142 2.45553   5
  -3 -12   1 22.3493 1.90423   3
  -3 -12   1 15.4700 2.60216   9
   3 -12  -1 17.7765 1.47425  10
  -3 -12   1 18.1458 2.39033   5
   4 -12   1 642.865 21.5819   9
   4  12  -1 635.764 20.2999   1
   4 -12   1 635.565 18.8545   2
  -4 -12  -1 604.348 18.4842   9
  -4 -12  -1 617.539 19.2216   3
   4 -12   1 617.416 19.2743   8
  -4 -12  -1 625.645 19.0524   5
  -4  12   1 612.440 22.6079   1
   4 -12   1 639.530 17.4642  10
  -4 -12  -1 634.381 18.9614   9
  -4 -12  -1 635.375 23.7786   8
   4 -12   1 611.146 19.8116   4
   4 -12  -1 644.848 18.6617   2
  -4 -12   1 604.999 19.2676   9
  -4 -12   1 647.833 19.8316   9
  -4 -12   1 605.548 23.5979   8
  -4 -12   1 657.553 19.2220   5
   4 -12  -1 638.628 21.3328   9
  -4 -12   1 641.181 16.8699   2
  -4  12  -1 619.983 22.7114   1
   4  12   1 633.015 20.0891   1
   4 -12  -1 636.465 17.3047  10
   4 -12  -1 627.279 17.8464   8
   4 -12  -1 622.407 19.6895   4
  -4 -12   1 644.717 17.1470   2
  -4  12  -1 647.910 19.7605   8
  -4 -12   1 624.799 17.7073   3
   5 -12   1 2.59944 1.93494   4
   5 -12   1 0.76760 0.99540  10
  -5 -12  -1 1.08094 1.31440   9
   5  12  -1 1.97462 1.49800   1
  -5  12   1 0.21986 1.90686   1
  -5 -12  -1 0.41051 1.27833   5
   5 -12   1 1.01243 1.35459   2
   5 -12   1 0.44562 1.91137   9
  -5 -12  -1 1.47412 0.77291   2
   5 -12   1 1.97215 1.42768   8
  -5 -12  -1 1.91003 2.28925   8
   5 -12  -1 0.86068 1.72065   9
  -5 -12   1 2.78698 1.59890   5
   5  12   1 3.09715 1.58406   1
   5 -12  -1 1.71662 1.01418  10
  -5  12  -1 2.85906 2.28728   1
   5 -12  -1 1.49451 1.31724   2
  -5  12  -1 2.56156 0.63546   7
  -5 -12   1 2.61976 1.59981   9
  -5 -12   1 0.84892 2.30496   8
   6 -12   1 394.858 13.9831   2
   6 -12   1 395.122 12.4351  10
  -6  12   1 377.321 16.9388   1
  -6 -12  -1 391.963 14.4077   5
   6 -12   1 401.467 16.9230   9
  -6 -12  -1 386.895 11.9912   2
  -6 -12  -1 390.528 18.8723   8
  -6 -12  -1 363.307 13.8940   9
  -6 -12   1 398.106 19.1607   8
   6 -12  -1 427.173 12.5048  10
   6 -12  -1 417.290 16.9898   9
  -6  12  -1 409.432 11.4530   7
  -6  12  -1 417.118 17.5301   1
  -6 -12   1 404.001 12.6246   2
  -6 -12   1 401.809 14.8209   9
   6 -12  -1 411.914 13.9568   2
  -6 -12   1 412.585 14.5858   5
  -7 -12  -1 -0.9519 1.68146   5
  -7 -12  -1 1.40194 1.62647   9
  -7 -12  -1 1.13084 1.15637   2
  -7 -12  -1 1.72222 2.72501   8
   7 -12   1 0.22653 1.33734  10
   7 -12   1 -0.1466 2.09302   9
  -7  12   1 0.86705 2.33340   1
   7 -12   1 0.27712 1.68576   2
   7 -12  -1 1.24839 1.33812  10
  -7 -12   1 0.19042 1.61788   5
  -7  12  -1 -0.1609 2.25865   1
  -7  12  -1 1.54051 1.06954   7
  -7 -12   1 0.99548 1.73575   9
   7 -12  -1 2.22074 2.50823   9
  -7 -12   1 2.22258 2.98348   8
  -7 -12   1 1.86876 1.42321   2
   7 -12  -1 0.46765 1.57963   2
   8 -12   1 2.66286 2.10785   2
  -8 -12  -1 7.14200 2.64289   9
  -8 -12  -1 4.54284 1.74741   2
  -8  12   1 5.03613 3.22765   1
   8 -12   1 1.93144 1.57673  10
   8 -12  -1 3.19071 1.65956  10
   8 -12  -1 1.98961 1.95844   2
  -8 -12   1 4.15507 1.45943  10
  -8  12  -1 3.84557 1.43671   7
  -8 -12   1 4.69696 1.88160   2
  -8 -12   1 3.93107 2.28181   9
  -8  12  -1 2.63687 2.75698   1
  -9 -12  -1 1.57546 2.17267   9
   9 -12   1 1.51661 1.55255  10
  -9 -12  -1 2.84296 1.88940   2
  -9 -12   1 2.10475 1.80676   2
   9 -12  -1 1.35291 1.56011  10
  -9 -12   1 2.44116 2.38193   9
  -9  12  -1 2.04000 1.47859   7
  -9 -12   1 1.54970 1.42861  10
 -10 -12  -1 24.3279 3.69875   2
 -10 -12  -1 29.1488 3.70093  10
  10 -12   1 27.0725 3.34910  10
 -10 -12  -1 27.0740 5.11726   9
 -10  12  -1 26.8082 3.10517   7
  10 -12  -1 29.3056 3.47643  10
 -10 -12   1 24.4317 3.27730  10
 -10 -12   1 29.3239 5.41579   9
 -10 -12   1 29.7267 4.20666   2
   0 -13  -1 -0.5899 1.23104   8
   0 -13  -1 0.47179 0.81440   4
   0  13  -1 0.02490 0.57672   4
   0  13  -1 -0.1677 0.56462   5
   0 -13   1 0.40193 0.94902   4
   0  13   1 0.68476 1.72164   1
   0 -13   1 -0.0093 1.15685   9
   0 -13  -1 0.09800 0.55263   5
   0 -13   1 0.40047 0.68746   2
   0 -13  -1 0.12015 0.47448   2
   0  13  -1 0.28405 1.42237   1
   0 -13   1 -0.1062 0.61289   2
   0 -13   1 0.87486 1.48305   8
   0 -13  -1 0.16006 1.03489   9
   0  13  -1 -0.0086 1.39246   8
   0 -13   1 0.14473 1.17811   9
   0  13   1 -0.4586 1.06088   8
   0 -13  -1 -0.1377 0.93176   9
   0 -13  -1 -0.0291 0.42733   2
   1 -13   1 65.1671 3.56063   2
  -1 -13  -1 73.7046 3.54099   4
   1 -13   1 72.4727 5.01072   9
   1 -13   1 72.5223 4.17863   4
   1 -13   1 72.0782 2.49138  10
  -1  13   1 72.6178 6.01914   1
  -1  13   1 73.3693 4.74579   8
  -1 -13  -1 67.7317 3.24325   5
   1 -13   1 73.1078 5.34203   8
   1 -13   1 71.2367 4.83937   9
  -1 -13  -1 67.6582 3.99079   9
   1  13  -1 69.5882 3.30952   5
   1 -13   1 71.3763 3.41331   2
  -1 -13  -1 71.4153 4.46969   3
  -1 -13  -1 71.7848 4.19753   9
   1 -13   1 65.1030 2.87232   7
  -1 -13  -1 63.5429 5.35107   8
   1  13  -1 70.0827 5.77650   1
   1 -13  -1 62.4909 3.15823   2
   1  13   1 67.1939 5.67084   1
  -1  13  -1 65.2186 3.32405   4
  -1 -13   1 60.8495 4.27866   9
   1 -13  -1 63.3281 4.32507   9
   1 -13  -1 65.0368 2.95341   2
  -1 -13   1 64.5385 2.76590   2
  -1 -13   1 63.5592 5.62753   8
  -1  13  -1 63.7708 5.85622   1
   1 -13  -1 62.0920 4.44542   9
   1 -13  -1 62.4543 3.72693   4
   1 -13  -1 66.1193 4.76319   8
  -1  13  -1 64.2954 4.92719   8
   1  13   1 64.2646 3.36345   5
  -1 -13   1 64.9652 3.14885   5
  -1 -13   1 64.0329 2.80034   2
  -1 -13   1 62.7140 4.42099   9
   2 -13   1 -0.5595 1.15066   9
  -2 -13  -1 -0.2252 0.84759   9
   2  13  -1 0.00505 1.43133   1
  -2 -13  -1 0.14478 0.94274   9
   2 -13   1 -0.0193 0.91711   2
   2 -13   1 0.11803 0.55812  10
  -2 -13  -1 0.29723 1.01116   3
   2  13  -1 -0.1227 0.80134   5
  -2 -13  -1 0.23454 1.40682   8
  -2  13   1 -0.5517 1.42493   1
  -2 -13  -1 0.03550 0.77965   5
   2 -13   1 0.23780 1.29541   8
   2 -13   1 0.63123 0.87172   2
   2 -13   1 0.62986 1.01023   2
   2 -13   1 -0.1446 0.98507   4
  -2  13   1 0.01382 0.95056   8
  -2 -13   1 0.24404 0.80884   5
  -2 -13   1 0.42716 0.52093   2
   2 -13  -1 0.57319 1.14980   8
  -2  13  -1 -0.3223 0.79110   4
  -2  13  -1 0.99586 1.84265   1
   2 -13  -1 -0.0954 1.18077   9
   2 -13  -1 0.14151 0.87493   2
   2 -13  -1 0.04854 0.75830   2
  -2 -13   1 -0.3101 0.99997   9
  -2 -13   1 -0.0704 0.51824   2
   2 -13  -1 0.63734 1.19593   9
   2 -13  -1 0.32700 1.01116   4
  -2 -13   1 0.35091 1.15281   9
   2  13   1 -0.3019 0.85983   5
   2 -13  -1 0.19311 0.47920  10
  -2 -13   1 -0.1834 1.47095   8
   2 -13  -1 -0.1694 1.10942   9
   2 -13  -1 0.22361 0.89368   2
   2  13   1 0.11417 1.45533   1
  -2  13  -1 0.62094 1.28912   8
   3 -13   1 539.428 17.5446   4
  -3 -13  -1 545.771 16.5963   5
   3 -13   1 526.714 18.9117   9
  -3 -13  -1 563.064 21.2021   8
   3 -13   1 526.078 16.3850   2
  -3  13   1 546.339 20.8920   1
   3 -13   1 541.778 17.8005   8
  -3 -13  -1 530.433 16.7025   9
   3  13  -1 542.945 19.0547   1
  -3 -13  -1 537.429 16.4877   9
   3  13  -1 547.341 16.6967   5
   3 -13   1 536.008 15.1255  10
  -3  13   1 553.823 16.6161   8
  -3 -13  -1 530.388 16.9031   3
  -3 -13   1 552.097 21.3809   8
   3 -13  -1 563.112 18.8476   9
  -3  13  -1 559.409 20.9866   1
  -3  13  -1 554.503 17.1042   4
   3 -13  -1 566.618 16.7311   8
   3 -13  -1 564.162 15.0136  10
  -3 -13   1 569.033 15.6993   3
   3  13   1 588.724 19.3671   1
  -3 -13   1 560.573 14.6663   2
   3 -13  -1 563.705 17.4474   4
  -3  13  -1 551.631 17.8702   8
   3  13   1 541.815 16.8992   5
   3 -13  -1 535.770 16.1310   2
  -3 -13   1 566.802 16.6915   5
  -3 -13   1 536.291 14.7529   2
  -3 -13   1 574.568 17.7237   9
  -3 -13   1 554.373 17.4756   9
   4  13  -1 -0.1046 1.38258   1
   4 -13   1 -0.3068 1.07353   2
  -4 -13  -1 -0.5865 1.75266   8
  -4  13   1 -0.0849 1.95283   1
  -4 -13  -1 -0.4194 0.95103   9
  -4 -13  -1 0.56979 1.19124   3
  -4 -13  -1 0.47088 1.16195   9
   4 -13   1 -0.4216 1.12585   8
   4 -13   1 0.82504 1.76739   9
   4 -13   1 0.37577 0.88147  10
  -4 -13  -1 -0.0656 1.11289   5
   4 -13   1 0.51001 1.35622   4
   4  13   1 -0.4267 1.31670   1
  -4 -13   1 0.30501 1.29564   9
  -4  13  -1 0.62182 2.14990   1
  -4 -13   1 0.39746 0.78347   2
   4 -13  -1 0.20572 1.06294   2
  -4 -13   1 0.22278 1.94858   8
   4 -13  -1 0.07223 1.48401   9
  -4 -13   1 0.34812 1.12724   5
   4 -13  -1 -0.4163 0.71355  10
   4 -13  -1 0.14713 0.88455   8
   5 -13   1 338.109 14.8408   9
   5  13  -1 353.593 13.1863   1
   5 -13   1 354.166 10.9520  10
   5 -13   1 358.133 12.4380   2
  -5 -13  -1 353.838 17.2103   8
  -5 -13  -1 353.945 12.6485   5
  -5 -13  -1 349.548 9.93082   2
  -5  13   1 346.852 15.8710   1
  -5 -13  -1 349.487 12.4503   9
  -5 -13   1 334.702 12.9333   9
   5 -13  -1 349.687 14.8515   9
  -5 -13   1 332.847 16.8751   8
  -5  13  -1 348.459 15.9609   1
   5 -13  -1 343.228 12.1320   2
  -5 -13   1 344.917 10.7589   2
   5  13   1 340.929 13.4517   1
  -5 -13   1 336.544 12.4990   5
   5 -13  -1 340.224 10.6849  10
  -6 -13  -1 0.23260 1.36941   9
   6 -13   1 -0.5856 1.39711   2
   6 -13   1 0.09888 1.86268   9
  -6  13   1 1.21296 2.39279   1
  -6 -13  -1 -1.4169 1.22746   5
  -6 -13  -1 -0.2507 2.30564   8
  -6 -13  -1 0.63390 0.92563   2
   6 -13   1 -0.0829 1.02278  10
  -6  13  -1 1.45077 2.42041   1
   6 -13  -1 0.73860 1.47835   2
   6 -13  -1 0.86957 2.12128   9
  -6 -13   1 0.26504 1.47515   5
  -6 -13   1 0.57554 1.54564   9
  -6 -13   1 0.35714 2.37596   8
   6 -13  -1 -0.0173 1.06138  10
  -6 -13   1 0.79777 1.15661   2
  -7 -13  -1 142.696 11.5430   8
  -7  13   1 139.873 9.83707   1
   7 -13   1 129.468 5.99181  10
   7 -13   1 138.387 7.54147   2
  -7 -13  -1 137.123 5.99952   2
   7 -13   1 131.528 9.56900   9
  -7 -13  -1 135.677 7.59838   9
  -7  13  -1 136.211 9.80674   1
  -7 -13   1 118.428 10.8492   8
  -7 -13   1 140.119 8.04842   9
   7 -13  -1 141.609 9.78028   9
   7 -13  -1 133.455 7.30034   2
   7 -13  -1 128.556 5.95389  10
  -7 -13   1 137.613 6.38690   2
   8 -13   1 0.33197 1.68611   2
  -8  13   1 -0.3843 2.52598   1
  -8 -13  -1 0.09410 1.36520   2
   8 -13   1 0.53563 1.47359  10
  -8 -13  -1 0.84805 1.82419   9
  -8 -13   1 0.68708 1.51104   2
   8 -13  -1 0.26139 1.78756   2
   8 -13  -1 0.56214 1.41030  10
  -8  13  -1 -1.8255 2.30949   1
  -8 -13   1 -0.3029 1.84727   9
  -9 -13  -1 77.4228 6.66192   9
  -9 -13  -1 82.1302 5.35808   2
   9 -13   1 76.0693 4.76060  10
  -9 -13   1 76.9854 6.82835   9
  -9 -13   1 74.8964 4.37491  10
  -9 -13   1 74.5731 5.35506   2
 -10 -13  -1 1.49393 2.44512   9
 -10 -13  -1 -0.2634 2.14715   2
  10 -13   1 -0.4929 1.54827  10
 -10 -13   1 0.94533 1.62109  10
 -10 -13   1 0.83616 3.39807   2
  10 -13  -1 1.07777 1.71148  10
 -10 -13   1 -0.7015 2.10349   9
   0  14  -1 401.308 16.3933   1
   0 -14   1 393.839 14.1205   9
   0 -14  -1 389.281 10.8346   2
   0 -14  -1 401.425 12.3015   4
   0 -14  -1 371.426 13.3405   9
   0 -14  -1 385.306 14.9408   8
   0 -14  -1 398.190 10.6648   2
   0 -14   1 379.256 11.5985   2
   0 -14  -1 391.612 10.9088   5
   0 -14   1 355.710 10.2325   7
   0 -14   1 402.096 15.6312   8
   0 -14  -1 393.459 13.2285   9
   0 -14   1 397.300 12.8000   4
   0  14   1 406.590 16.3847   1
   0 -14   1 408.816 11.4484   2
   0 -14   1 414.510 14.0834   9
   0  14   1 369.305 14.4347   8
   1  14  -1 38.3855 4.63644   1
  -1  14   1 40.5467 4.99903   1
  -1 -14  -1 41.7310 4.64275   8
   1 -14   1 42.5896 1.86342  10
  -1 -14  -1 44.7257 3.57350   9
   1 -14   1 38.6513 3.28517   4
  -1 -14  -1 29.6622 2.92762   9
  -1  14   1 49.9671 4.10545   8
   1 -14   1 38.0363 4.17806   8
  -1 -14  -1 44.8279 2.58463   5
   1  14  -1 46.0740 2.68223   5
  -1 -14  -1 43.3627 2.87009   4
   1 -14   1 34.1571 2.50520   2
   1 -14   1 39.0638 3.19013   2
   1 -14   1 42.2562 2.30662   7
  -1  14  -1 44.9960 4.28387   8
   1 -14  -1 43.9223 2.68645   2
   1 -14  -1 29.1395 3.29267   9
  -1 -14   1 31.9355 3.35785   9
  -1 -14   1 33.9932 2.10798   2
   1 -14  -1 36.0993 2.28135   2
  -1  14  -1 46.8577 2.69220   4
   1 -14  -1 48.8630 4.08054   9
   1 -14  -1 38.2816 3.88739   8
   1 -14  -1 48.6000 3.31002   4
  -1 -14   1 42.6232 3.84045   9
  -1 -14   1 40.7079 2.48380   5
  -1 -14   1 43.2217 2.30354   2
  -1 -14   1 44.2414 4.95161   8
  -1  14  -1 36.4586 4.84050   1
   2  14  -1 250.272 11.8959   1
   2 -14   1 249.134 10.9076   8
  -2 -14  -1 257.601 8.86064   5
   2  14  -1 240.760 8.80670   5
  -2  14   1 248.035 12.8004   1
  -2  14   1 250.077 9.92301   8
  -2 -14  -1 246.494 12.4474   8
   2 -14   1 254.838 9.93140   4
  -2 -14  -1 259.662 9.63796   9
   2 -14   1 254.617 8.90878   2
   2 -14   1 256.250 7.75190  10
  -2 -14  -1 253.294 9.50017   9
  -2 -14  -1 252.223 9.82132   3
   2 -14   1 248.365 11.0301   9
   2  14   1 254.757 9.08811   5
  -2 -14   1 272.250 13.1529   8
  -2 -14   1 258.102 10.2764   9
   2 -14  -1 266.572 9.75833   4
  -2 -14   1 269.140 7.72270   2
  -2  14  -1 274.339 11.0129   8
  -2 -14   1 272.762 7.79483   2
   2 -14  -1 278.344 10.4809   8
   2  14   1 263.616 12.0951   1
   2 -14  -1 277.096 7.54776  10
  -2  14  -1 258.682 8.98380   4
  -2 -14   1 281.429 10.5568   9
  -2 -14   1 266.295 8.90540   5
   2 -14  -1 276.314 8.77022   2
  -2  14  -1 267.605 13.1209   1
   2 -14  -1 287.216 11.0995   9
   3 -14   1 51.7056 2.74441  10
  -3  14   1 46.9229 5.67585   1
  -3 -14  -1 42.1070 3.49070   9
  -3 -14  -1 51.9216 5.84633   8
   3 -14   1 38.6564 3.25069   2
   3 -14   1 47.6221 5.84413   4
   3  14  -1 47.3624 4.85491   1
   3 -14   1 59.8006 4.52936   8
  -3 -14  -1 52.3300 3.59430   5
  -3 -14  -1 62.9759 4.08183   3
  -3 -14   1 53.5680 2.44630   2
   3 -14  -1 42.4334 3.13899   2
   3 -14  -1 52.3526 2.56630  10
   3 -14  -1 53.6642 3.76781   8
  -3  14  -1 49.5305 5.72126   1
  -3 -14   1 53.0798 3.57956   5
   3  14   1 55.2092 5.14085   1
   3 -14  -1 41.8762 4.38220   9
  -3 -14   1 51.3714 5.97769   8
  -3 -14   1 43.9979 3.93579   9
  -4 -14  -1 402.753 13.4307   9
  -4 -14  -1 407.641 18.0914   8
  -4  14   1 396.646 17.2916   1
   4  14  -1 412.674 15.2610   1
   4 -14   1 390.767 13.6364   8
   4 -14   1 393.743 11.7084  10
  -4 -14  -1 394.511 13.8261   3
   4 -14   1 387.643 13.1165   2
  -4 -14  -1 403.919 13.3291   5
   4 -14   1 395.717 15.8822   9
   4 -14  -1 374.244 11.4310  10
  -4 -14   1 391.750 14.0609   9
   4 -14  -1 387.671 15.4525   9
  -4  14  -1 362.900 16.8700   1
   4  14   1 366.587 14.5654   1
   4 -14  -1 384.150 12.8326   2
  -4 -14   1 374.675 11.3079   2
  -4 -14   1 378.641 17.8771   8
  -4 -14   1 372.490 13.0960   5
   5 -14   1 19.0540 2.39034  10
   5 -14   1 10.6268 2.39053   2
  -5 -14  -1 16.4829 2.87704   9
  -5 -14  -1 14.4695 1.50994   2
  -5  14   1 13.3716 3.75807   1
  -5 -14  -1 10.5680 3.79242   8
   5 -14   1 11.3408 3.56539   9
  -5 -14  -1 19.4264 3.12466   5
  -5  14  -1 7.28871 3.12023   1
  -5 -14   1 13.9385 4.42317   8
   5 -14  -1 17.1422 2.13957  10
  -5 -14   1 22.5970 3.29584   5
  -5 -14   1 13.2820 2.82068   9
   5 -14  -1 12.4239 3.53139   9
  -5 -14   1 13.2414 1.93690   2
   5 -14  -1 13.5167 2.59828   2
  -6 -14  -1 71.8463 5.24579   9
   6 -14   1 73.2820 4.25780  10
  -6  14   1 67.2639 7.14748   1
  -6 -14  -1 66.7582 5.23803   5
   6 -14   1 75.0328 7.10354   9
   6 -14   1 73.7657 5.32051   2
  -6 -14  -1 75.7725 8.36049   8
  -6 -14  -1 74.8356 3.84630   2
   6 -14  -1 86.8103 5.47833   2
  -6 -14   1 83.0836 5.89961   9
  -6  14  -1 81.5367 7.77458   1
  -6 -14   1 84.0886 5.76337   5
   6 -14  -1 82.9905 4.32706  10
  -6 -14   1 84.0895 8.74838   8
   6 -14  -1 77.3355 7.06584   9
  -6 -14   1 81.9852 4.43382   2
   7 -14   1 13.8506 4.02019   9
  -7  14   1 26.4554 5.39321   1
   7 -14   1 18.2493 3.59965   2
  -7 -14  -1 22.0194 2.75948   2
   7 -14   1 16.8802 2.56658  10
  -7 -14  -1 24.1070 3.93517   9
   7 -14  -1 19.8266 2.70468  10
  -7 -14   1 28.3211 4.43858   9
   7 -14  -1 16.0310 4.32684   9
  -7  14  -1 18.7018 4.75908   1
  -7 -14   1 21.0539 2.89369   2
   7 -14  -1 12.1761 2.86400   2
  -8 -14  -1 52.3357 5.27984   9
   8 -14   1 56.0153 5.30892   2
   8 -14   1 55.8676 4.08647  10
  -8  14   1 47.2538 6.61562   1
  -8 -14  -1 57.1098 4.16019   2
  -8 -14   1 53.8361 5.56100   9
   8 -14  -1 58.1925 5.34314   2
  -8  14  -1 56.5191 7.20102   1
   8 -14  -1 58.7517 4.19915  10
   8 -14  -1 61.8385 7.69116   9
  -8 -14   1 53.7605 4.33080   2
   9 -14   1 1.25111 1.69327  10
  -9 -14  -1 2.43039 1.72787   2
  -9 -14  -1 1.56599 2.09969   9
   9 -14  -1 1.41027 1.71596  10
  -9 -14   1 2.03985 2.35970   9
  -9 -14   1 2.23403 1.83955   2
   0 -15  -1 0.26676 1.19996   9
   0 -15   1 -0.0318 0.98602   4
   0 -15  -1 0.47199 0.95128   4
   0  15   1 -0.4830 1.80641   1
   0 -15   1 -0.1776 1.18211   9
   0 -15   1 0.52105 1.62994   8
   0 -15  -1 -0.1473 0.57738   2
   0 -15  -1 0.36673 1.21404   9
   0  15  -1 -0.1867 1.87312   1
   0 -15  -1 -0.4297 1.43560   8
   0 -15  -1 0.56003 0.59852   5
   0 -15   1 0.32229 0.81018   2
   0 -15  -1 0.06062 0.63309   2
   1 -15   1 1012.69 29.9908   9
   1  15  -1 987.186 26.9658   5
   1 -15   1 1020.28 28.5060   4
   1  15  -1 985.974 32.1517   1
   1 -15   1 977.102 25.4672  10
  -1 -15  -1 994.382 28.4089   9
   1 -15   1 1008.75 30.9513   8
  -1 -15  -1 983.874 27.2239   4
  -1 -15  -1 989.982 26.5419   5
   1 -15   1 1006.30 26.9700   2
  -1  15   1 962.222 29.4967   8
   1 -15   1 969.131 26.1498   7
  -1 -15  -1 985.332 31.6440   8
  -1  15   1 995.689 32.9061   1
  -1 -15  -1 978.925 28.5982   9
   1  15   1 1017.51 32.3504   1
   1 -15  -1 987.496 27.8903   4
  -1 -15   1 1015.16 29.3845   9
   1 -15  -1 996.624 29.2334   9
  -1 -15   1 1052.36 26.2608   2
   1 -15  -1 1011.49 30.1513   8
  -1  15  -1 1011.96 32.9785   1
  -1 -15   1 1037.48 32.5573   8
   1 -15  -1 986.503 26.4040   2
   2  15  -1 -0.1175 1.71363   1
   2 -15   1 0.92982 0.71672  10
   2 -15   1 0.42972 1.48900   8
  -2 -15  -1 0.42543 1.21771   3
   2  15  -1 1.21017 1.08217   5
  -2 -15  -1 1.07740 1.24588   9
  -2  15   1 0.67554 1.88074   1
   2 -15   1 0.49161 1.47605   9
  -2 -15  -1 -0.6847 1.66965   8
  -2 -15  -1 0.80751 0.97042   5
  -2 -15  -1 -0.3180 1.10434   9
   2 -15   1 0.55671 1.02740   2
  -2 -15   1 0.42472 0.74654   2
   2 -15  -1 0.01363 0.82564   2
  -2 -15   1 -0.2718 1.75519   8
   2  15   1 0.38106 1.69108   1
   2 -15  -1 0.37609 1.33847   8
  -2  15  -1 0.36885 1.40824   8
   2 -15  -1 0.08066 0.54956  10
  -2  15  -1 0.04239 1.90945   1
  -2 -15   1 -0.1068 1.24080   9
  -2 -15   1 0.79094 0.99187   5
   2 -15  -1 1.02291 1.53352   9
   2  15   1 -0.1022 1.02441   5
  -3 -15  -1 635.231 18.8908   5
  -3 -15  -1 641.059 24.1720   8
  -3 -15  -1 637.322 19.3688   9
  -3  15   1 619.472 23.8834   1
   3 -15   1 624.325 18.8317   2
   3 -15   1 633.198 20.4765   8
  -3 -15  -1 622.124 19.2484   3
   3 -15   1 603.146 21.5489   9
   3  15  -1 645.498 22.3483   1
   3 -15   1 623.128 17.3222  10
  -3 -15  -1 633.357 19.3817   9
   3 -15  -1 628.015 18.5506   2
  -3 -15   1 619.485 18.7433   5
  -3 -15   1 641.933 24.4142   8
   3 -15  -1 641.567 19.5018   8
  -3 -15   1 639.169 20.2885   9
   3  15   1 636.603 22.1517   1
  -3  15  -1 642.247 24.1604   1
   3 -15  -1 637.882 21.4760   9
  -3 -15   1 610.334 17.0603   2
   3 -15  -1 634.667 17.1342  10
   4 -15   1 -0.2207 0.94965  10
  -4 -15  -1 -1.4648 1.86129   8
   4 -15   1 0.10323 1.23703   2
  -4 -15  -1 0.33722 1.31192   5
   4 -15   1 -0.6995 1.65792   9
   4  15  -1 -0.7149 1.59801   1
  -4  15   1 -0.2384 2.06169   1
  -4 -15  -1 0.81224 1.27238   9
   4  15   1 0.30005 1.68503   1
   4 -15  -1 1.19205 0.93979  10
  -4 -15   1 0.33164 1.37163   9
  -4 -15   1 -0.2183 0.82748   2
   4 -15  -1 -0.2324 1.61417   9
  -4 -15   1 0.13427 1.19432   5
  -4 -15   1 -0.3428 2.03372   8
  -4  15  -1 -0.3323 2.18384   1
   4 -15  -1 -0.0395 1.09099   2
   5 -15   1 204.908 11.5403   9
   5 -15   1 205.217 9.10652   2
  -5 -15  -1 205.022 9.22193   5
  -5 -15  -1 213.091 13.4973   8
  -5 -15  -1 218.697 9.36279   9
   5 -15   1 205.432 7.75675  10
  -5  15   1 227.248 12.9879   1
  -5 -15  -1 208.554 6.81923   2
  -5 -15   1 226.422 10.0745   9
  -5 -15   1 232.993 7.84805   2
  -5 -15   1 214.714 13.6694   8
  -5  15  -1 228.090 13.0162   1
  -5 -15   1 212.370 9.32368   5
   5 -15  -1 210.976 11.3848   9
   5 -15  -1 227.116 7.75694  10
   5 -15  -1 220.018 9.13041   2
  -6 -15  -1 0.31808 1.44463   5
  -6  15   1 1.52712 2.72192   1
   6 -15   1 -0.1919 1.14652  10
   6 -15   1 0.50679 1.66370   2
  -6 -15  -1 -0.2642 1.39299   9
  -6 -15  -1 0.07584 0.99863   2
   6 -15   1 1.02104 2.32288   9
  -6 -15  -1 -0.3062 2.36134   8
  -6 -15   1 -0.0179 1.51278   9
  -6 -15   1 0.68986 1.19409   2
   6 -15  -1 -0.1609 1.47024   2
   6 -15  -1 0.66049 1.19218  10
  -6 -15   1 0.08997 1.47079   5
  -6 -15   1 2.02004 3.07835   8
  -6  15  -1 1.67697 2.66606   1
   6 -15  -1 0.58783 2.07454   9
  -7  15   1 32.5330 6.06512   1
   7 -15   1 28.5901 5.88693   9
   7 -15   1 33.6603 3.26278  10
  -7 -15  -1 31.7395 4.03835   9
   7 -15   1 28.8735 4.36764   2
  -7 -15  -1 30.6034 2.95660   2
   7 -15  -1 29.6922 5.85296   9
  -7 -15   1 24.1206 2.97704   2
  -7  15  -1 26.1644 5.55753   1
   7 -15  -1 28.7051 4.19892   2
  -7 -15   1 29.2540 4.18609   9
   7 -15  -1 29.7254 3.36708  10
  -8 -15  -1 0.64268 1.79030   9
  -8  15   1 1.37638 2.90425   1
   8 -15   1 0.46846 1.56799  10
  -8 -15  -1 1.70744 1.55287   2
   8 -15   1 0.65722 1.91237   2
   8 -15  -1 0.56634 2.00621   2
  -8 -15   1 1.58992 2.06980   9
   8 -15  -1 1.04424 1.54447  10
   8 -15  -1 0.50713 2.75621   9
  -8  15  -1 1.28348 2.95731   1
  -8 -15   1 1.96747 1.69001   2
  -9 -15  -1 108.560 6.32147   2
   9 -15   1 98.2233 5.77937  10
  -9 -15  -1 112.890 8.01232   9
  -9 -15   1 110.866 8.18711   9
  -9 -15   1 116.163 6.73560   2
   0 -16  -1 113.453 4.80541   5
   0 -16  -1 114.150 6.31348   9
   0 -16  -1 109.973 7.45082   8
   0 -16   1 112.623 4.75396   2
   0  16  -1 115.028 8.50460   1
   0 -16   1 113.115 6.70727   9
   0 -16   1 111.031 7.79434   8
   0  16   1 114.385 8.49777   1
   0 -16  -1 112.560 4.23541   2
  -1 -16  -1 2.84286 0.73610   2
   1 -16   1 5.39992 0.93725  10
  -1 -16  -1 5.32864 1.26438   5
  -1 -16  -1 5.41033 1.54140   4
  -1 -16  -1 4.21822 0.85445   2
   1  16  -1 4.05664 2.48842   1
  -1 -16  -1 2.66250 1.69667   9
   1 -16   1 3.00336 2.12377   8
  -1  16   1 2.79915 2.47111   1
   1 -16   1 2.65474 1.19048   2
  -1 -16  -1 4.45543 2.45879   8
   1 -16   1 3.66941 1.89374   9
   1 -16  -1 1.90677 1.60947   9
   1 -16  -1 4.26025 2.24389   8
   1 -16  -1 4.27994 1.21070   2
  -1  16  -1 2.48629 2.40048   1
  -1 -16   1 1.62757 1.57481   9
  -1 -16   1 3.87126 1.13834   2
   1  16   1 4.37231 2.55274   1
  -1 -16   1 3.98188 2.52691   8
   2 -16   1 1096.12 29.4411   2
   2 -16   1 1086.67 32.5454   8
  -2  16   1 1080.51 35.7031   1
  -2 -16  -1 1054.45 28.9864   5
   2 -16   1 1075.91 27.7756  10
  -2 -16  -1 1077.77 30.5121   9
   2 -16   1 1101.86 32.7692   9
  -2 -16  -1 1116.89 35.2307   8
   2  16  -1 1069.14 34.2653   1
  -2 -16   1 1042.46 35.1765   8
  -2 -16   1 1029.86 28.8962   5
   2 -16  -1 1052.05 31.3370   8
   2 -16  -1 1058.18 28.9255   2
  -2  16  -1 1058.60 35.5388   1
   2  16   1 1073.87 34.1669   1
  -2 -16   1 1071.30 31.4056   9
   2 -16  -1 1075.69 32.1661   9
  -2 -16   1 1056.56 27.9514   2
   2 -16  -1 1026.82 27.3830  10
   3 -16   1 0.53906 1.20405   2
  -3  16   1 0.64929 2.41602   1
   3 -16   1 0.69237 1.89885   9
  -3 -16  -1 0.86333 1.21375   5
  -3 -16  -1 0.64021 1.27666   9
   3 -16   1 0.99957 1.58582   8
   3 -16   1 0.18858 0.85304  10
   3  16  -1 0.98023 1.99461   1
  -3 -16  -1 1.81561 2.33002   8
  -3 -16   1 0.41866 1.36782   9
  -3 -16   1 1.40547 0.91120   2
  -3 -16   1 1.76352 1.31013   5
  -3 -16   1 1.53670 2.39625   8
  -3  16  -1 1.15988 2.23340   1
   3 -16  -1 0.47964 0.77311  10
   3 -16  -1 0.42241 1.74160   9
   3 -16  -1 1.54969 1.24594   2
   3  16   1 1.99131 2.07098   1
   4  16  -1 89.7588 6.88995   1
  -4 -16  -1 92.7833 5.54523   9
   4 -16   1 95.3778 5.45437   2
  -4  16   1 82.0286 7.75061   1
   4 -16   1 88.5355 7.12084   9
   4 -16   1 82.8764 4.16363  10
  -4 -16  -1 86.2848 5.20322   5
  -4 -16  -1 88.0765 8.38722   8
   4 -16  -1 85.8766 4.02708  10
   4 -16  -1 89.2833 6.96630   9
  -4 -16   1 81.9647 5.73512   9
   4 -16  -1 84.5498 5.05856   2
   4  16   1 87.9836 6.70652   1
  -4 -16   1 77.6647 5.02872   5
  -4 -16   1 89.7888 4.06695   2
  -4  16  -1 85.4485 8.10210   1
  -4 -16   1 85.5583 8.33553   8
  -5 -16  -1 4.05709 1.86511   5
   5 -16   1 2.02640 1.72365   2
   5 -16   1 1.85087 2.42014   9
  -5 -16  -1 2.21461 0.99685   2
  -5  16   1 2.70957 2.87984   1
  -5 -16  -1 2.37226 1.75663   9
   5 -16   1 2.64016 1.35789  10
  -5 -16  -1 1.61840 2.77334   8
   5 -16  -1 2.76841 2.42117   9
   5 -16  -1 2.70330 1.31632  10
  -5 -16   1 1.73430 1.60915   5
   5 -16  -1 0.99319 1.53613   2
  -5 -16   1 2.31054 1.24489   2
  -5  16  -1 3.73587 3.14179   1
  -5 -16   1 1.70674 1.77686   9
  -5 -16   1 2.70601 2.97936   8
  -6 -16  -1 235.363 8.17417   2
   6 -16   1 235.871 13.2474   9
  -6 -16  -1 234.477 10.3898   9
   6 -16   1 235.796 10.4057   2
   6 -16   1 225.180 8.69098  10
  -6 -16  -1 229.114 10.4436   5
  -6  16   1 223.508 13.6963   1
  -6 -16   1 239.090 8.79806   2
   6 -16  -1 242.294 13.1603   9
  -6 -16   1 237.074 11.0073   9
   6 -16  -1 230.520 10.1644   2
  -6  16  -1 248.758 14.3097   1
   6 -16  -1 238.520 8.67995  10
  -6 -16   1 249.168 10.6875   5
  -7 -16  -1 1.93169 1.94294   9
   7 -16   1 0.08556 1.81527   2
  -7  16   1 1.85832 2.90900   1
  -7 -16  -1 1.12985 1.37310   2
   7 -16   1 -0.7988 2.40194   9
   7 -16   1 1.73742 1.58519  10
  -7 -16   1 1.38051 1.93040   9
  -7  16  -1 1.95080 2.94551   1
   7 -16  -1 1.90313 1.95434   2
  -7 -16   1 1.16804 1.47224   2
   7 -16  -1 0.99962 1.56943  10
   7 -16  -1 1.04741 2.74009   9
  -8 -16  -1 224.327 9.14213   2
  -8  16   1 246.754 14.6937   1
   8 -16   1 234.822 11.0904   2
  -8 -16  -1 219.715 11.0665   9
   8 -16   1 247.102 9.36209  10
   8 -16  -1 226.446 9.09565  10
   8 -16  -1 221.864 10.8376   2
  -8 -16   1 218.579 11.4528   9
   8 -16  -1 216.215 13.8116   9
  -8 -16   1 225.990 9.57377   2
  -8  16  -1 222.311 14.0801   1
  -9 -16  -1 2.43118 2.39887   9
  -9 -16  -1 3.01141 1.95077   2
   9 -16   1 1.89964 1.84549  10
  -9 -16   1 3.31969 2.60015   9
   9 -16  -1 1.76198 1.84250  10
  -9 -16   1 5.16094 2.41585   2
   0 -17  -1 -0.0120 1.71977   8
   0 -17   1 0.09995 1.88882   8
   0 -17   1 0.21326 1.00849   2
   0 -17   1 0.69895 1.57196   9
   0  17  -1 0.60270 2.04547   1
   0  17   1 0.37832 2.25009   1
   0 -17  -1 -0.5098 1.25791   9
   0 -17  -1 -0.3560 0.72317   2
  -1 -17  -1 93.0132 5.77719   9
   1 -17   1 96.5685 7.16159   8
   1 -17   1 96.3677 4.72902   2
  -1 -17  -1 100.541 3.59692   2
   1  17  -1 94.0250 7.89441   1
  -1  17   1 102.433 8.50073   1
   1 -17   1 96.6286 6.69281   9
   1 -17   1 100.390 3.59826  10
  -1 -17  -1 96.6121 7.65257   8
   1  17   1 97.3817 8.05913   1
  -1 -17   1 88.8720 4.16230   2
  -1 -17   1 97.5472 7.90714   8
   1 -17  -1 88.7344 4.27198   2
   1 -17  -1 85.8556 5.97897   9
  -1 -17   1 88.2213 6.08368   9
   1 -17  -1 91.0294 6.60584   8
  -1  17  -1 90.9889 7.96890   1
  -2 -17  -1 0.25392 2.00234   8
   2  17  -1 -0.6272 1.93536   1
  -2 -17  -1 0.01258 1.39329   9
   2 -17   1 0.95568 1.79018   9
  -2  17   1 0.06530 2.27446   1
   2 -17   1 0.60981 1.75682   8
   2 -17   1 -0.1247 0.75254  10
  -2 -17  -1 0.81388 1.06309   5
   2 -17   1 0.40747 1.17850   2
  -2 -17   1 0.33770 1.01103   5
  -2 -17   1 -0.2839 1.44208   9
   2 -17  -1 0.92561 1.77016   9
   2  17   1 0.46324 2.10481   1
  -2  17  -1 -0.5854 1.89623   1
   2 -17  -1 0.42255 1.08460   2
  -2 -17   1 0.14648 2.21559   8
  -2 -17   1 0.21621 0.89662   2
   2 -17  -1 -0.0020 0.66717  10
   3 -17   1 145.107 6.93548   2
   3  17  -1 155.627 9.72093   1
   3 -17   1 156.963 5.78476  10
  -3  17   1 160.523 10.9959   1
  -3 -17  -1 150.004 7.49618   9
   3 -17   1 149.243 9.14647   9
  -3 -17  -1 150.274 6.84123   5
  -3 -17  -1 144.867 10.3848   8
   3 -17  -1 163.348 9.23985   9
  -3 -17   1 167.157 11.2572   8
   3 -17  -1 156.576 6.84260   2
  -3 -17   1 151.382 5.70632   2
   3  17   1 161.511 9.80317   1
  -3 -17   1 158.789 6.88258   5
  -3  17  -1 146.131 10.6590   1
   3 -17  -1 154.751 5.55216  10
  -3 -17   1 157.772 8.18544   9
   4 -17   1 -0.5910 1.34658   2
   4 -17   1 -0.8363 1.00374  10
  -4  17   1 0.90726 2.61629   1
   4  17  -1 0.64967 2.13610   1
  -4 -17  -1 0.31672 0.68581   2
  -4 -17  -1 -0.2680 1.28357   5
  -4 -17  -1 0.09948 2.42921   8
  -4 -17  -1 0.54082 1.47300   9
   4 -17   1 -0.1794 1.87260   9
  -4  17  -1 1.43666 2.57502   1
  -4 -17   1 -0.1343 1.35700   5
   4 -17  -1 0.35468 1.29608   2
  -4 -17   1 0.73179 1.04228   2
   4  17   1 1.27465 2.09862   1
  -4 -17   1 -0.4778 1.37595   9
   4 -17  -1 -0.3286 1.87255   9
  -4 -17   1 -1.7207 2.26625   8
   4 -17  -1 0.33939 0.98728  10
   5 -17   1 66.6019 4.04432  10
  -5  17   1 68.9212 7.79402   1
  -5 -17  -1 68.0755 8.13503   8
  -5 -17  -1 62.9086 5.03418   9
  -5 -17  -1 72.3486 3.38301   2
   5 -17   1 65.5550 5.06569   2
  -5 -17  -1 69.2541 5.17026   5
   5 -17   1 67.1536 6.86662   9
  -5 -17   1 61.6346 7.99462   8
  -5 -17   1 64.2712 4.99640   5
   5 -17  -1 63.2529 6.56135   9
  -5 -17   1 63.5846 5.43014   9
  -5  17  -1 67.6503 7.52986   1
   5 -17  -1 69.8119 3.94043  10
   5 -17  -1 64.6585 4.85836   2
  -5 -17   1 66.2070 3.89105   2
   6 -17   1 0.68416 1.39091  10
  -6 -17  -1 -0.3812 1.04792   2
  -6 -17  -1 1.19172 2.15991   5
   6 -17   1 0.26115 2.50374   9
  -6 -17  -1 0.96712 1.68935   9
   6 -17   1 1.79324 1.80091   2
  -6  17   1 2.04859 2.82495   1
   6 -17  -1 -0.6851 1.21699  10
   6 -17  -1 0.51829 2.19231   9
  -6 -17   1 0.24905 1.72193   9
  -6 -17   1 0.00747 1.78158   5
   6 -17  -1 0.00375 1.48472   2
  -6  17  -1 -1.0544 2.71738   1
  -6 -17   1 0.90034 1.33644   2
  -7  17   1 55.1215 7.35542   1
   7 -17   1 50.1825 5.06276   2
   7 -17   1 48.8199 6.93425   9
  -7 -17  -1 49.5984 3.72445   2
   7 -17   1 46.1625 3.91101  10
  -7 -17  -1 59.9063 5.31882   9
  -7 -17   1 48.7657 4.00190   2
  -7  17  -1 52.1046 7.33392   1
  -7 -17   1 51.9486 5.36277   9
   7 -17  -1 54.7384 4.08062  10
   7 -17  -1 49.5844 6.80314   9
   7 -17  -1 53.2758 5.10584   2
  -8  17   1 0.87591 3.03360   1
   8 -17   1 1.00058 2.12464   2
  -8 -17  -1 -1.0407 1.42011   2
  -8 -17  -1 0.33054 1.74032   9
   8 -17   1 -0.4069 1.53947  10
   8 -17  -1 1.07217 1.99946   2
   8 -17  -1 -0.2412 1.57355  10
  -8 -17   1 0.05031 1.56057   2
   8 -17  -1 -0.2306 2.59124   9
  -8 -17   1 1.25809 2.17721   9
  -8  17  -1 -0.7267 2.86258   1
   0 -18   1 420.179 12.8849   2
   0  18  -1 418.075 18.8205   1
   0 -18  -1 421.769 17.1932   8
   0 -18  -1 412.479 15.3082   9
   0 -18  -1 402.117 12.1499   2
   0 -18   1 410.962 17.5828   8
   0 -18   1 411.071 15.8572   9
   0  18   1 411.620 18.5333   1
   1 -18   1 29.6798 4.56309   8
   1 -18   1 22.0846 2.58978   2
  -1 -18  -1 25.0424 3.42866   9
   1 -18   1 29.0513 1.89505  10
   1  18  -1 23.1711 4.64095   1
  -1  18   1 33.5896 5.97011   1
  -1 -18  -1 25.9316 1.91622   2
   1 -18   1 24.3420 4.21287   9
  -1 -18  -1 24.2128 4.78537   8
   1 -18  -1 23.4882 2.33842   2
  -1 -18   1 25.6730 2.40966   2
   1  18   1 34.9064 5.37387   1
   1 -18  -1 31.2497 4.38008   8
  -1  18  -1 30.8138 5.81328   1
  -1 -18   1 23.5074 3.90350   9
   1 -18  -1 19.7862 3.63661   9
  -1 -18   1 33.7947 5.22195   8
   2 -18   1 224.211 11.3064   9
  -2  18   1 212.581 13.1080   1
   2 -18   1 224.670 8.81308   2
  -2 -18  -1 221.417 9.77410   9
  -2 -18  -1 229.286 12.9966   8
  -2 -18  -1 224.292 6.79658   2
   2 -18   1 221.689 7.30220  10
   2  18  -1 233.080 12.7417   1
  -2 -18   1 241.408 10.7111   9
   2 -18  -1 227.340 11.0289   9
  -2  18  -1 212.344 13.1919   1
   2  18   1 230.666 12.7027   1
  -2 -18   1 230.716 13.3288   8
   2 -18  -1 223.341 7.01745  10
  -2 -18   1 227.842 7.75101   2
   2 -18  -1 231.465 8.51422   2
  -3  18   1 12.0080 4.17780   1
   3 -18   1 9.88357 1.63010  10
  -3 -18  -1 8.53807 2.39425   9
  -3 -18  -1 11.1350 4.07788   8
   3  18  -1 9.75551 3.37440   1
   3 -18   1 7.78342 3.02212   9
   3 -18   1 9.22215 2.24989   2
  -3 -18  -1 9.15094 1.19324   2
   3 -18  -1 11.9432 1.70098  10
  -3  18  -1 11.3023 4.14051   1
  -3 -18   1 9.31104 1.67753   2
   3 -18  -1 6.70510 1.86673   2
  -3 -18   1 8.08547 2.53678   9
   3 -18  -1 5.98044 2.73550   9
   3  18   1 10.7302 3.32833   1
  -3 -18   1 11.8692 4.19625   8
  -4 -18  -1 226.858 14.1507   8
  -4 -18  -1 228.973 7.15611   2
   4  18  -1 229.649 12.2293   1
   4 -18   1 226.791 12.3671   9
   4 -18   1 230.498 9.73563   2
  -4  18   1 215.642 13.6987   1
  -4 -18  -1 227.661 9.54307   5
   4 -18   1 227.929 8.15403  10
  -4 -18  -1 228.385 9.99032   9
   4 -18  -1 230.886 7.98421  10
  -4  18  -1 228.945 14.0542   1
   4 -18  -1 233.721 9.51166   2
   4  18   1 221.681 11.9534   1
  -4 -18   1 229.467 14.4778   8
  -4 -18   1 229.604 10.6377   9
  -4 -18   1 238.217 8.18471   2
  -4 -18   1 241.018 9.75060   5
   4 -18  -1 237.306 12.3015   9
  -5 -18  -1 0.69951 1.73921   9
   5 -18   1 1.45472 1.40440  10
  -5 -18  -1 1.62745 1.11403   2
   5 -18   1 2.67060 1.90880   2
   5 -18   1 0.87327 2.47047   9
  -5  18   1 -0.4228 2.51243   1
  -5 -18  -1 2.20745 1.84039   5
  -5 -18  -1 4.32603 5.35126   8
  -5 -18   1 1.57566 1.35905   2
   5 -18  -1 3.40609 2.86170   9
  -5 -18   1 3.83150 2.21103   9
  -5 -18   1 1.51375 1.83821   5
   5 -18  -1 1.32674 1.27267  10
   5 -18  -1 1.50545 1.71206   2
  -5  18  -1 0.87441 3.02371   1
  -6 -18  -1 173.261 8.93856   9
   6 -18   1 172.226 7.35823  10
  -6  18   1 164.616 12.2467   1
   6 -18   1 167.196 11.4503   9
  -6 -18  -1 172.523 6.80918   2
   6 -18   1 182.564 9.15701   2
  -6 -18   1 166.257 9.27670   9
   6 -18  -1 173.873 7.26137  10
   6 -18  -1 183.456 11.7332   9
  -6  18  -1 163.510 12.2843   1
   6 -18  -1 186.238 9.01903   2
  -6 -18   1 180.023 7.48532   2
  -7 -18  -1 0.76995 1.44328   2
   7 -18   1 1.05030 2.71683   9
   7 -18   1 2.01579 1.75288  10
  -7 -18  -1 0.57769 1.86686   9
   7 -18   1 2.35460 2.16151   2
  -7  18   1 2.59748 3.21319   1
   7 -18  -1 1.05528 1.57381  10
  -7 -18   1 1.53328 2.11954   9
  -7 -18   1 0.47762 1.48351   2
   7 -18  -1 0.61962 2.75072   9
  -7  18  -1 -0.0399 3.00643   1
   7 -18  -1 0.59319 1.97763   2
  -8 -18  -1 102.677 7.33984   9
  -8  18   1 98.1493 9.94960   1
   8 -18   1 94.0828 5.79277  10
   8 -18   1 100.718 7.41134   2
  -8 -18  -1 94.7244 5.68492   2
  -8 -18   1 96.5383 7.54217   9
   8 -18  -1 110.966 7.61030   2
  -8  18  -1 102.132 10.0940   1
  -8 -18   1 103.893 6.21922   2
   8 -18  -1 109.289 10.2518   9
   0  19  -1 0.78589 2.43234   1
   0 -19  -1 0.40115 0.92498   2
   0 -19   1 0.11581 1.74532   9
   0  19   1 1.42521 2.65186   1
   0 -19   1 -0.4393 2.03625   8
   0 -19   1 0.79273 1.16103   2
   0 -19  -1 0.14059 1.54049   9
   0 -19  -1 0.79819 2.08243   8
   1 -19   1 230.379 7.24173  10
  -1 -19  -1 237.710 12.9768   8
  -1  19   1 239.234 13.9669   1
  -1 -19  -1 226.025 7.51813   2
   1 -19   1 222.410 8.71663   2
   1 -19   1 208.490 11.0078   9
   1 -19   1 235.071 12.5646   8
  -1 -19  -1 224.216 10.2886   9
   1  19  -1 244.027 13.6878   1
  -1 -19   1 230.009 8.25674   2
  -1  19  -1 240.654 13.9280   1
  -1 -19   1 237.430 13.3167   8
  -1 -19   1 225.620 10.8513   9
   1  19   1 251.618 13.7980   1
   1 -19  -1 240.785 8.44992   2
   1 -19  -1 228.223 10.9375   9
   2 -19   1 -0.2476 0.84686  10
   2 -19   1 -1.1690 1.10584   2
   2 -19   1 0.60086 1.92751   9
   2  19  -1 -2.2558 1.88199   1
  -2 -19  -1 -0.2741 0.73238   2
  -2  19   1 0.22980 2.62210   1
  -2 -19  -1 0.23113 1.50435   9
  -2 -19  -1 -0.4933 2.08936   8
   2 -19  -1 1.57800 1.97231   9
   2  19   1 -0.0974 2.35851   1
  -2 -19   1 -2.1046 2.07732   8
  -2 -19   1 0.26635 1.02490   2
   2 -19  -1 -0.3672 0.70336  10
   2 -19  -1 -0.7609 1.05610   2
  -2 -19   1 -0.7221 1.55482   9
  -2  19  -1 -0.6639 2.40096   1
  -3  19   1 71.1385 7.81390   1
   3 -19   1 72.3792 6.77038   9
   3  19  -1 77.2362 7.36605   1
  -3 -19  -1 69.3108 5.33404   9
  -3 -19  -1 75.0039 3.29850   2
   3 -19   1 69.1309 3.79834  10
  -3 -19  -1 76.9383 8.05134   8
   3 -19   1 69.0298 4.85715   2
   3 -19  -1 74.7324 3.67048  10
   3 -19  -1 81.2490 4.92765   2
  -3  19  -1 77.7468 8.32576   1
  -3 -19   1 72.5182 3.95946   2
  -3 -19   1 74.8812 5.95189   9
   3  19   1 81.8154 7.43221   1
   3 -19  -1 80.6496 6.80030   9
  -3 -19   1 75.0439 8.15481   8
   4 -19   1 -0.7230 1.39596   2
   4 -19   1 -0.8758 1.06193  10
   4 -19   1 0.90778 2.20999   9
   4  19  -1 0.32269 2.27274   1
  -4  19   1 2.38526 3.14974   1
  -4 -19  -1 -0.4794 2.37065   8
  -4 -19  -1 0.45962 1.56328   9
  -4 -19  -1 -0.5386 0.87929   2
  -4  19  -1 -0.1063 2.63699   1
   4 -19  -1 -0.3587 1.05079  10
   4  19   1 -0.4596 2.37736   1
   4 -19  -1 0.39030 1.39387   2
  -4 -19   1 -0.1697 1.71649   9
  -4 -19   1 0.83358 2.69283   8
  -4 -19   1 -0.4080 1.11792   2
   4 -19  -1 -0.7037 1.94377   9
  -5 -19  -1 319.578 12.9908   9
   5 -19   1 321.092 11.0224  10
  -5 -19  -1 328.681 10.2629   2
   5 -19   1 318.319 12.8769   2
  -5  19   1 321.827 17.7343   1
   5 -19   1 311.205 15.9647   9
   5 -19  -1 326.834 10.9119  10
  -5 -19   1 320.798 11.0500   2
  -5  19  -1 328.672 17.8922   1
   5 -19  -1 328.095 12.6957   2
   5 -19  -1 323.394 15.9330   9
  -5 -19   1 332.264 13.8591   9
  -6 -19  -1 -0.2134 1.16603   2
   6 -19   1 -0.2118 2.48546   9
  -6  19   1 1.21687 3.13360   1
   6 -19   1 0.83577 1.83140   2
  -6 -19  -1 -0.4380 1.74330   9
   6 -19   1 0.98616 1.52238  10
   6 -19  -1 0.59980 1.73800   2
   6 -19  -1 -0.4852 2.35415   9
  -6  19  -1 -0.8259 2.72527   1
  -6 -19   1 0.60628 1.32563   2
   6 -19  -1 0.23574 1.39456  10
  -6 -19   1 0.05445 1.87213   9
  -7 -19  -1 11.7680 2.36842   2
  -7 -19  -1 12.3635 3.23033   9
  -7  19   1 12.0638 4.73159   1
   7 -19   1 8.28292 2.41710  10
   7 -19   1 10.1602 3.23719   2
   7 -19   1 7.69268 3.90057   9
  -7 -19   1 11.4498 2.52890   2
  -7  19  -1 6.61224 3.94867   1
   7 -19  -1 10.6037 3.16854   2
  -7 -19   1 11.8060 3.46778   9
   7 -19  -1 9.46647 2.34763  10
   7 -19  -1 9.67147 4.13461   9
   0 -20  -1 27.6132 2.54090   2
   0 -20   1 30.2567 2.97694   2
   0  20  -1 30.8044 6.19569   1
   0 -20   1 31.9497 5.73421   8
   0 -20  -1 30.8112 4.61719   9
   0  20   1 25.0656 5.67785   1
   0 -20   1 24.6003 4.45459   9
   1 -20   1 0.69713 1.30599   2
  -1  20   1 2.23135 2.90279   1
   1 -20   1 2.97337 2.17477   9
   1 -20   1 2.56439 1.44037  10
  -1 -20  -1 3.14099 1.19305   2
  -1 -20  -1 2.85026 2.60429   8
  -1 -20  -1 2.21834 1.80388   9
   1  20  -1 3.47781 2.95818   1
   1 -20  -1 1.93390 1.35828   2
   1 -20  -1 1.98087 1.98967   9
  -1 -20   1 3.20906 2.19380   9
  -1  20  -1 3.78462 3.33926   1
  -1 -20   1 2.18713 1.32031   2
   1  20   1 2.46408 2.83254   1
  -1 -20   1 3.74043 2.96457   8
  -2  20   1 95.0713 9.24412   1
   2  20  -1 90.3293 8.46952   1
   2 -20   1 88.0868 4.23877  10
   2 -20   1 99.4352 5.69457   2
  -2 -20  -1 92.4843 8.77546   8
  -2 -20  -1 96.4810 6.54055   9
  -2 -20  -1 96.6454 4.19205   2
   2 -20   1 87.5975 7.45180   9
  -2  20  -1 109.582 9.77586   1
  -2 -20   1 102.209 4.89845   2
   2 -20  -1 115.283 7.85246   9
   2 -20  -1 102.969 5.44160   2
  -2 -20   1 115.421 9.70858   8
   2  20   1 109.498 9.05956   1
  -2 -20   1 113.536 7.37895   9
   3 -20   1 1.02776 1.53975   2
  -3  20   1 2.21391 3.07173   1
   3 -20   1 1.23805 1.19706  10
   3 -20   1 0.80056 2.32390   9
  -3 -20  -1 1.18551 0.98857   2
  -3 -20  -1 1.48499 1.77886   9
   3  20  -1 3.37515 2.95371   1
  -3 -20  -1 2.36536 2.94335   8
  -3 -20   1 1.52742 2.01917   9
   3 -20  -1 1.18332 1.49796   2
   3 -20  -1 1.46763 2.23697   9
  -3 -20   1 1.69669 1.32714   2
  -3 -20   1 -0.7284 2.52527   8
  -3  20  -1 0.23303 2.83589   1
   3 -20  -1 1.49089 1.03994  10
   3  20   1 1.44395 2.55379   1
  -4 -20  -1 94.5769 4.36449   2
   4 -20   1 101.302 8.54975   9
   4 -20   1 99.8032 5.11093  10
   4 -20   1 102.929 6.44972   2
  -4  20   1 87.1516 9.37517   1
  -4 -20  -1 102.961 14.7839   8
  -4 -20  -1 105.249 6.79545   9
   4 -20  -1 110.693 6.38538   2
   4 -20  -1 110.747 8.61849   9
  -4  20  -1 116.355 10.5608   1
  -4 -20   1 108.224 7.33934   9
   4 -20  -1 113.036 5.06597  10
  -4 -20   1 110.356 5.24688   2
  -5 -20  -1 0.26140 1.11771   2
   5 -20   1 -1.0949 2.21545   9
   5 -20   1 1.62681 1.49363  10
   5 -20   1 -0.4591 1.68757   2
  -5  20   1 0.82636 3.15042   1
  -5 -20  -1 -1.1305 1.55701   9
   5 -20  -1 -0.6416 2.27483   9
   5 -20  -1 0.07371 1.23821  10
  -5 -20   1 -0.2178 1.25669   2
   5 -20  -1 0.38253 1.66751   2
  -5 -20   1 -0.0164 1.84514   9
  -5  20  -1 0.18758 3.07313   1
  -6  20   1 112.875 10.7228   1
  -6 -20  -1 112.569 7.37493   9
   6 -20   1 115.396 7.46093   2
   6 -20   1 116.650 6.10272  10
  -6 -20  -1 122.521 5.66255   2
   6 -20   1 114.298 9.90794   9
   6 -20  -1 110.787 7.23546   2
  -6 -20   1 115.853 6.08448   2
  -6 -20   1 125.104 8.14877   9
   6 -20  -1 110.641 9.71795   9
   6 -20  -1 121.162 6.04910  10
  -6  20  -1 111.118 10.7042   1
  -7  20   1 1.60501 3.31707   1
  -7 -20  -1 0.43031 1.99959   9
  -7 -20  -1 0.87181 1.47877   2
   7 -20   1 -0.0136 1.57917  10
   7 -20   1 0.60033 2.93662   9
   7 -20   1 -0.4591 1.97177   2
  -7  20  -1 4.56680 3.80731   1
   7 -20  -1 -0.0551 2.79720   9
  -7 -20   1 1.08998 1.68187   2
  -7 -20   1 1.82695 2.26551   9
   7 -20  -1 0.65769 2.06820   2
   7 -20  -1 1.49309 1.77987  10
   0 -21   1 -0.5053 1.75979   9
   0  21  -1 0.02194 2.64544   1
   0 -21  -1 0.65014 1.86408   9
   0 -21  -1 0.66514 1.19019   2
   0 -21   1 -0.1607 1.21470   2
   0  21   1 -1.0065 2.49016   1
   1  21  -1 246.562 14.4755   1
  -1  21   1 227.589 14.4036   1
   1 -21   1 223.049 11.8076   9
  -1 -21  -1 234.146 7.97398   2
   1 -21   1 226.181 9.07722   2
  -1 -21  -1 227.881 10.8535   9
  -1  21  -1 226.873 14.3111   1
  -1 -21   1 210.313 11.0803   9
  -1 -21   1 214.716 13.3394   8
   1 -21  -1 211.737 8.46429   2
   1 -21  -1 211.811 11.2479   9
  -1 -21   1 211.627 8.39032   2
   1  21   1 212.447 13.5724   1
   2  21  -1 -0.2226 2.44722   1
  -2 -21  -1 0.04874 1.65841   9
   2 -21   1 -0.6054 1.93307   9
   2 -21   1 -0.7292 1.32172   2
  -2 -21  -1 -0.0263 2.64761   8
  -2 -21  -1 -0.1491 0.98181   2
  -2  21   1 0.59484 2.88126   1
   2 -21   1 0.84652 1.07790  10
  -2 -21   1 -0.0076 2.51948   8
  -2  21  -1 1.27370 3.15125   1
   2 -21  -1 0.09143 1.31707   2
   2  21   1 0.37862 2.48893   1
  -2 -21   1 -1.0155 1.18316   2
  -2 -21   1 0.83465 1.89066   9
   2 -21  -1 -0.0638 1.90854   9
  -3  21   1 85.7382 9.27978   1
   3 -21   1 78.3299 4.26526  10
  -3 -21  -1 76.1538 3.88027   2
   3  21  -1 81.4473 8.06447   1
  -3 -21  -1 74.6580 8.63187   8
  -3 -21  -1 80.8737 6.10382   9
   3 -21   1 72.1767 7.24338   9
   3 -21   1 81.9215 5.59023   2
   3 -21  -1 72.0556 6.97428   9
  -3  21  -1 83.3679 9.20180   1
  -3 -21   1 74.4417 6.39654   9
  -3 -21   1 83.5098 4.62793   2
   3 -21  -1 80.5148 4.04999  10
  -3 -21   1 77.5296 8.99651   8
   3  21   1 84.0861 8.17852   1
   3 -21  -1 79.7504 5.27615   2
   4 -21   1 0.36935 2.37697   9
  -4  21   1 -1.4514 2.99090   1
   4 -21   1 0.11688 1.28599  10
  -4 -21  -1 0.36333 1.11996   2
  -4 -21  -1 -0.0988 1.71821   9
   4 -21   1 -0.3588 1.54688   2
   4 -21  -1 -0.0878 1.51426   2
   4 -21  -1 1.23187 1.23624  10
   4 -21  -1 0.67838 2.39034   9
  -4 -21   1 0.99965 1.91640   9
  -4  21  -1 -0.3670 3.20211   1
  -4 -21   1 0.06514 1.33678   2
   5 -21   1 32.8329 6.51470   9
  -5 -21  -1 30.8801 4.16745   9
  -5 -21  -1 32.2062 2.88661   2
   5 -21   1 28.7856 4.30714   2
   5 -21   1 28.4154 3.15741  10
  -5  21   1 35.4558 7.33728   1
  -5 -21   1 32.0396 5.05179   9
  -5 -21   1 29.3958 3.20689   2
   5 -21  -1 31.3896 3.14071  10
   5 -21  -1 26.5326 4.05754   2
  -5  21  -1 31.8325 7.18509   1
   5 -21  -1 25.9499 5.51841   9
  -6 -21  -1 0.20367 1.89480   9
   6 -21   1 -0.8940 1.50532  10
   6 -21   1 1.27939 2.83608   9
  -6  21   1 -1.1612 2.77524   1
  -6 -21  -1 -1.0509 1.25839   2
   6 -21   1 -1.1172 1.84253   2
  -6  21  -1 -1.7117 2.89682   1
  -6 -21   1 2.19946 2.23428   9
   6 -21  -1 0.57512 1.44344  10
  -6 -21   1 -0.0836 1.39442   2
   6 -21  -1 0.62987 1.95287   2
   6 -21  -1 0.05733 2.65866   9
   0 -22   1 441.128 17.7864   9
   0 -22   1 409.683 14.0268   2
   0  22  -1 406.468 20.5231   1
   0 -22  -1 425.780 13.5741   2
   0 -22  -1 416.056 16.8698   9
   0  22   1 423.709 20.7642   1
  -1 -22  -1 2.13204 2.10661   9
  -1 -22  -1 0.82908 1.24188   2
  -1  22   1 3.36057 3.33327   1
   1 -22   1 1.64739 1.63793   2
   1 -22   1 1.16362 2.33897   9
   1  22  -1 3.13837 3.43791   1
  -1 -22   1 3.06179 1.57041   2
  -1 -22   1 0.37388 2.05978   9
  -1  22  -1 1.36789 3.35359   1
   1 -22  -1 2.55668 1.55231   2
   1  22   1 3.19941 3.13459   1
   1 -22  -1 1.26767 2.11895   9
   2  22  -1 183.915 12.7971   1
  -2  22   1 199.575 13.9484   1
   2 -22   1 192.115 11.3997   9
   2 -22   1 187.651 6.96002  10
   2 -22   1 199.237 8.78418   2
  -2 -22  -1 191.749 7.12844   2
  -2 -22  -1 180.078 9.76755   9
   2  22   1 183.964 12.5694   1
   2 -22  -1 189.047 11.0075   9
  -2 -22   1 183.879 10.3175   9
  -2 -22   1 177.568 7.60166   2
   2 -22  -1 182.048 8.20045   2
  -2  22  -1 186.690 13.4457   1
  -2 -22   1 181.942 13.0194   8
  -3 -22  -1 0.17443 1.11036   2
   3 -22   1 0.12773 1.57731   2
   3  22  -1 1.34809 3.04060   1
  -3  22   1 -2.0290 2.76212   1
  -3 -22  -1 0.62890 1.82549   9
   3 -22   1 -0.3384 1.21026  10
   3 -22   1 2.02991 2.67107   9
  -3  22  -1 0.83550 3.28965   1
   3 -22  -1 -1.4033 1.88925   9
  -3 -22   1 -0.0786 1.18989   2
  -3 -22   1 -1.1858 1.87985   9
   3  22   1 -0.1809 2.64032   1
   3 -22  -1 -0.8562 1.40664   2
   3 -22  -1 -0.5197 1.08467  10
  -4  22   1 101.078 10.4223   1
   4 -22   1 98.5233 6.67754   2
  -4 -22  -1 105.610 5.04086   2
   4 -22   1 101.805 9.04481   9
  -4 -22  -1 106.261 7.17718   9
   4 -22   1 100.757 5.33058  10
  -4  22  -1 107.487 10.7680   1
   4 -22  -1 108.354 5.28882  10
   4 -22  -1 113.279 9.09856   9
   4 -22  -1 115.722 6.87091   2
  -4 -22   1 111.147 5.68174   2
  -4 -22   1 107.554 7.73022   9
   5 -22   1 -0.5154 2.81831   9
   5 -22   1 0.16312 1.44269  10
  -5 -22  -1 1.70205 1.40655   2
  -5 -22  -1 1.03789 2.08271   9
  -5  22   1 1.52660 3.35915   1
   5 -22   1 0.73245 1.97650   2
   5 -22  -1 -0.1254 1.79501   2
  -5  22  -1 -1.5782 3.03530   1
  -5 -22   1 2.10456 2.30823   9
   5 -22  -1 0.72224 1.52526  10
  -5 -22   1 -0.0115 1.36404   2
   5 -22  -1 -0.1551 2.67994   9
   0 -23   1 0.16070 2.17878   9
   0 -23  -1 0.36963 1.31607   2
   0 -23  -1 1.49954 2.15163   9
   0  23   1 1.99059 3.07141   1
   0 -23   1 0.66714 1.57246   2
   0  23  -1 0.30614 3.18257   1
  -1 -23  -1 48.5586 5.47977   9
   1 -23   1 53.9170 6.34248   9
   1 -23   1 55.6696 4.53342   2
  -1 -23  -1 50.0364 3.71969   2
  -1  23   1 59.5622 8.19656   1
   1  23  -1 55.4016 7.96234   1
   1 -23  -1 55.6621 6.05620   9
   1  23   1 63.7371 8.07903   1
  -1 -23   1 55.5722 4.15197   2
  -1 -23   1 53.1575 5.90116   9
  -1  23  -1 57.2287 7.85414   1
   1 -23  -1 59.2691 4.33862   2
   2  23  -1 -1.2412 2.48120   1
   2 -23   1 -0.0527 1.54987   2
  -2 -23  -1 0.02359 1.17733   2
  -2  23   1 -1.4030 2.92824   1
   2 -23   1 1.49240 2.36290   9
   2 -23   1 -0.0865 1.16884  10
  -2 -23  -1 0.13196 2.02541   9
   2  23   1 0.05222 2.74906   1
   2 -23  -1 0.41293 2.26494   9
  -2  23  -1 -0.8605 3.11178   1
  -2 -23   1 0.01689 1.88283   9
  -2 -23   1 0.73957 1.46150   2
   2 -23  -1 -0.3759 1.45034   2
  -3  23   1 41.0772 7.92426   1
   3 -23   1 35.4358 4.27904   2
   3  23  -1 43.5874 6.82801   1
  -3 -23  -1 39.4872 4.87532   9
  -3 -23  -1 34.5668 3.11375   2
   3 -23   1 34.9372 6.40703   9
   3 -23   1 36.4589 3.23993  10
   3 -23  -1 37.9767 3.05951  10
  -3  23  -1 45.3241 8.54541   1
   3  23   1 39.3793 7.00206   1
   3 -23  -1 33.1354 5.98167   9
   3 -23  -1 32.4347 3.93849   2
  -3 -23   1 44.4174 3.75988   2
  -3 -23   1 38.9729 5.88327   9
  -4 -23  -1 0.34771 1.94899   9
   4 -23   1 -1.9311 1.57786   2
   4 -23   1 1.08425 1.50064  10
  -4  23   1 -1.0743 3.12722   1
  -4 -23  -1 -0.5883 1.23107   2
   4 -23   1 0.19635 2.61862   9
  -4 -23   1 -1.0697 1.87212   9
   4 -23  -1 -0.6077 1.27350  10
  -4 -23   1 0.57164 1.51001   2
   4 -23  -1 0.87803 2.55253   9
   4 -23  -1 -0.3803 1.64741   2
  -4  23  -1 -0.6376 3.72243   1
   0  24  -1 289.578 17.5625   1
   0 -24   1 305.509 14.8515   9
   0 -24  -1 309.998 11.1081   2
   0 -24   1 273.563 11.1705   2
   0 -24  -1 292.006 14.1016   9
   0  24   1 295.532 17.6055   1
  -1  24   1 1.98539 3.51442   1
   1 -24   1 2.70186 2.55779   9
   1  24  -1 2.28657 3.56340   1
  -1 -24  -1 0.22359 1.37023   2
  -1 -24  -1 0.79274 2.15374   9
   1 -24   1 0.95704 1.71011   2
   1 -24  -1 1.50182 1.64083   2
  -1 -24   1 0.40009 1.56001   2
   1  24   1 0.91625 3.05240   1
  -1 -24   1 2.49175 2.47055   9
   1 -24  -1 0.40864 2.11694   9
  -1  24  -1 1.77898 3.56230   1
   2  24  -1 280.390 16.9637   1
  -2 -24  -1 284.183 13.4698   9
   2 -24   1 289.992 15.3305   9
   2 -24   1 302.659 12.1733   2
   2 -24   1 293.069 10.0785  10
  -2 -24  -1 279.885 10.2883   2
  -2  24   1 280.040 17.7382   1
  -2  24  -1 304.924 18.4050   1
  -2 -24   1 297.793 14.2761   9
  -2 -24   1 300.238 11.1560   2
   2 -24  -1 307.579 15.2292   9
   2 -24  -1 305.994 11.8152   2
   2  24   1 299.835 17.2738   1
   3 -24   1 4.45025 3.11844   9
   3 -24   1 5.28854 2.39430   2
  -3 -24  -1 3.82708 1.71077   2
  -3 -24  -1 5.48931 2.88185   9
   3 -24   1 5.86093 1.86114  10
   3 -24  -1 3.40011 2.11017   2
  -3 -24   1 3.94965 1.76185   2
  -3 -24   1 2.68397 2.61018   9
   3 -24  -1 5.23665 3.20730   9
   3 -24  -1 3.80038 1.61492  10
   0 -25  -1 -0.5063 1.35610   2
   0  25   1 0.50075 3.00995   1
   0 -25  -1 0.52731 2.27582   9
   0  25  -1 -0.9494 2.86160   1
   0 -25   1 1.04221 1.73101   2
   0 -25   1 -0.6318 2.34983   9
  -1 -25  -1 29.3979 5.29327   9
  -1 -25  -1 32.2035 3.46181   2
   1 -25   1 26.8967 5.58384   9
   1  25  -1 32.1282 7.05259   1
   1 -25   1 33.1301 5.02373   2
   1 -25  -1 35.6278 3.94418   2
   1 -25  -1 36.5757 6.07810   9
   1  25   1 43.1928 7.98839   1
  -1 -25   1 33.1503 3.76817   2
  -1 -25   1 36.3450 5.95058   9
   0   0  -2 293.981 7.42595  10
   0   0  -2 290.090 8.04335   9
   0   0   2 294.896 7.65379   2
   0   0  -2 286.019 8.36969   1
   0   0  -2 317.171 7.84249   6
   0   0  -2 295.177 7.44564  10
   0   0   2 313.147 8.48236   1
   0   0  -2 291.759 7.68251   2
   0   0  -2 296.907 8.10743   9
   0   0  -2 290.101 7.61057   2
   0   0   2 304.760 7.65987   2
   0   0  -2 294.574 8.44132   8
   0   0   2 293.261 8.42623   8
   1   0  -2 0.41476 0.47587   8
  -1   0  -2 0.06449 0.42759   9
  -1   0   2 0.00044 0.44969   8
   1   0  -2 -0.1013 0.38992   3
   1   0  -2 0.27971 0.44416   1
   1   0  -2 0.09929 0.39232   9
  -1   0   2 -0.2644 0.39789   3
  -1   0  -2 -0.0221 0.38376   9
   1   0   2 -0.0799 0.30931   4
  -1   0   2 0.09828 0.27809   7
   1   0   2 0.01194 0.20645   2
  -1   0  -2 0.45350 0.24091   2
  -1   0  -2 0.34837 0.18763   7
   1   0  -2 0.00415 0.22886  10
  -1   0  -2 0.17091 0.45278   9
  -1   0   2 0.27457 0.40430   9
  -1   0   2 0.11830 0.28381   2
   1   0  -2 -0.1557 0.24840   7
   1   0   2 0.29942 0.19111   2
  -1   0  -2 0.00627 0.12950  10
  -1   0  -2 0.23677 0.25598   2
   1   0  -2 0.52313 0.37544   6
  -1   0   2 0.06090 0.30021   2
   1   0   2 -0.0385 0.20251   9
  -1   0  -2 -0.1552 0.33760   4
  -1   0  -2 -0.0910 0.47516   8
  -1   0  -2 -0.0274 0.46321   1
   1   0   2 0.16370 0.52558   8
   1   0   2 0.16159 0.43314   1
  -1   0   2 0.19252 0.22634  10
   1   0  -2 0.20977 0.30199   2
   1   0  -2 -0.0588 0.24695   2
  -1   0  -2 -0.2514 0.37865   5
  -1   0   2 -0.1529 0.40630   1
   2   0   2 584.742 15.5946   4
   2   0   2 604.835 16.9581   8
  -2   0   2 580.748 15.1595   7
  -2   0   2 585.508 15.3956   2
   2   0  -2 611.820 15.7690   1
  -2   0  -2 585.468 15.6433   4
   2   0  -2 582.603 14.9643  10
  -2   0  -2 597.461 15.1795   2
  -2   0  -2 592.723 14.7728  10
   2   0  -2 590.424 15.3850   2
   2   0  -2 593.792 16.1713   9
   2   0   2 596.394 15.6751   1
  -2   0  -2 597.235 16.1084   9
   2   0  -2 562.422 15.3775   2
   2   0  -2 572.762 15.6571   5
  -2   0   2 582.476 16.1869   9
   2   0   2 596.877 15.7822   5
  -2   0  -2 614.988 15.6974   1
  -2   0   2 590.916 15.7916   1
  -2   0  -2 597.732 16.9789   8
  -2   0   2 575.466 15.0370  10
   2   0  -2 597.296 15.3869   6
  -2   0  -2 587.795 16.1344   9
   2   0  -2 579.700 15.8049   1
  -2   0  -2 585.300 15.7062   5
  -2   0  -2 569.545 15.2107   2
  -2   0   2 579.013 15.4069   2
   2   0  -2 578.819 15.0825   7
   2   0  -2 584.070 16.3862   8
  -2   0  -2 547.181 14.8947   7
  -2   0   2 592.814 16.4943   8
  -3   0  -2 0.31976 0.56301   1
  -3   0   2 0.12147 0.50036   2
   3   0  -2 0.16283 0.47478   7
  -3   0  -2 -0.1508 0.60252   5
   3   0   2 0.74741 0.63204   4
   3   0  -2 0.79626 0.69224   5
   3   0  -2 0.72868 0.43813  10
  -3   0  -2 0.27295 0.48482   7
  -3   0  -2 0.45457 0.70073   9
   3   0   2 0.18576 0.25949   7
   3   0   2 0.90624 0.84224   9
  -3   0   2 0.46586 0.82088   8
  -3   0   2 0.79819 0.81894   8
   3   0  -2 0.75335 0.86047   8
   3   0   2 0.12222 0.89730   8
   3   0  -2 0.62679 0.57004   1
  -3   0  -2 0.63932 0.52449   2
   3   0   2 0.59287 0.68705   5
   3   0   2 0.38385 0.43197   2
  -3   0   2 0.53923 0.69123   5
  -3   0  -2 0.70459 0.38460  10
   3   0  -2 0.07720 0.73419   9
   3   0  -2 0.65474 0.57383   2
  -3   0  -2 1.08172 1.01820   8
  -3   0  -2 0.70857 0.67845   4
  -3   0   2 -0.0475 0.78036   9
  -3   0  -2 0.83408 0.54957   2
   3   0  -2 0.60310 0.60179   1
   3   0   2 0.41691 0.55898   1
  -3   0   2 0.11085 0.49467   7
  -3   0   2 -0.4711 0.40827  10
  -4   0   2 88.1368 5.08394   8
  -4   0   2 81.3846 3.24894  10
  -4   0  -2 87.8319 3.66790   2
   4   0   2 82.3508 3.96859   4
   4   0  -2 91.6648 5.09495   8
  -4   0  -2 78.2447 3.53374   2
  -4   0  -2 88.3685 4.14134   4
   4   0   2 88.1006 3.58894   1
  -4   0  -2 77.3571 3.23306   7
  -4   0   2 89.7500 4.79923   9
  -4   0  -2 77.4963 3.37370   1
  -4   0  -2 84.2161 3.10388  10
   4   0  -2 86.0404 4.16274   4
   4   0  -2 97.6634 3.89007   1
  -4   0   2 84.2038 3.72045   2
   4   0  -2 77.5626 3.52475   2
   4   0   2 77.6647 4.00323   5
   4   0   2 81.0170 3.31103   2
  -4   0  -2 90.3919 4.12109   5
   4   0  -2 82.2914 3.56654   1
  -4   0  -2 91.3339 5.40201   8
   4   0  -2 83.2376 4.55483   9
  -4   0   2 83.0745 4.07013   5
  -4   0   2 84.8936 3.39919   7
  -4   0   2 93.2871 4.89703   8
   4   0  -2 84.7717 4.05231   5
  -4   0  -2 89.7674 4.83200   9
   4   0   2 74.2800 4.38109   9
   4   0   2 92.3072 5.30354   8
  -5   0   2 -0.1918 0.75812   7
  -5   0  -2 1.88752 0.90336   7
  -5   0  -2 0.45380 0.80633   2
   5   0   2 0.02700 0.70687   1
   5   0  -2 0.19338 1.00517   4
  -5   0   2 -0.0633 1.17463   9
   5   0  -2 0.30637 0.74375   1
   5   0   2 -0.6100 0.79873   4
   5   0  -2 0.08941 1.00781   5
  -5   0  -2 -0.6039 1.29807   8
  -5   0   2 0.57398 1.31609   8
   5   0  -2 -0.1567 0.60298  10
   5   0   2 0.55510 0.67160   2
  -5   0   2 -0.5014 0.89779   5
  -5   0  -2 -0.3160 1.34334   8
  -5   0  -2 0.56955 1.23059   9
  -5   0   2 -0.0190 0.68176  10
  -5   0  -2 -0.0897 0.90087   5
   5   0  -2 -0.3264 0.76300   2
   5   0   2 -0.6681 1.24201   8
   5   0   2 -0.6703 0.89958   5
   5   0   2 -0.0739 1.15011   9
  -5   0   2 0.54677 1.20816   8
  -5   0  -2 -0.0913 0.60655  10
  -5   0  -2 -0.3904 0.92592   4
  -5   0  -2 0.29970 0.71594   1
  -5   0   2 -0.6939 0.77794   2
   5   0  -2 -0.7098 1.09706   9
   5   0  -2 0.32128 0.76106   1
   6   0  -2 11.9611 1.30964  10
  -6   0   2 7.61894 2.32239   9
   6   0   2 10.2662 2.76350   8
   6   0  -2 9.25041 1.50189   1
  -6   0  -2 13.4075 1.81697   7
  -6   0  -2 12.8908 1.99815   2
  -6   0  -2 9.04182 1.96910   5
  -6   0  -2 10.5592 2.51125   9
  -6   0   2 10.7894 2.13430   5
  -6   0  -2 10.3663 1.42012   1
  -6   0   2 9.97474 1.82879   2
   6   0  -2 10.7139 1.61909   1
  -6   0   2 11.4632 1.73282   7
  -6   0  -2 11.0973 2.94480   8
   6   0  -2 12.8693 2.39769   4
  -6   0  -2 13.5806 2.38480   4
  -6   0   2 8.67396 2.55596   8
   6   0   2 9.67731 2.42366   9
   6   0   2 10.1017 1.53095   1
   6   0  -2 11.6932 2.68739   9
  -6   0   2 9.31100 1.46923  10
  -6   0  -2 9.87774 1.43913  10
   6   0   2 9.89220 1.49016   2
   6   0  -2 11.5639 1.86118   2
   7   0  -2 0.22448 0.65587  10
  -7   0   2 0.36291 1.27224   5
   7   0   2 0.54356 1.72110   8
  -7   0  -2 0.48572 1.23375   5
  -7   0   2 0.20754 1.65929   9
  -7   0   2 -0.3964 0.80286  10
  -7   0  -2 0.92212 1.07416   7
  -7   0   2 1.19028 1.22205   2
  -7   0  -2 0.42654 0.86512  10
  -7   0  -2 -0.0422 0.74475   1
  -7   0  -2 1.14171 1.92758   8
  -7   0   2 0.18343 1.66452   8
  -7   0  -2 -0.1389 1.54284   9
  -7   0   2 0.59438 1.02592   7
  -7   0  -2 -0.5821 0.98343   2
  -8   0   2 162.470 9.59876   9
  -8   0  -2 171.534 9.86406   9
  -8   0   2 169.615 8.17437   5
  -8   0   2 161.190 6.49102  10
  -8   0  -2 167.828 7.52395   2
  -8   0  -2 169.791 6.51051  10
  -8   0   2 157.736 7.44956   2
  -8   0   2 163.741 10.0248   8
  -8   0  -2 159.336 7.96079   5
  -8   0   2 168.648 6.87332   7
   8   0   2 165.572 9.96887   8
  -8   0  -2 171.193 10.6646   8
  -8   0  -2 166.673 6.73336   7
  -9   0  -2 0.00412 2.16590   9
  -9   0   2 -0.6278 1.23015  10
  -9   0   2 0.06701 1.63199   2
   9   0   2 -1.1693 2.12870   8
  -9   0   2 2.46840 2.43786   8
  -9   0  -2 -0.5971 1.15642  10
  -9   0   2 -2.8245 1.89151   9
  -9   0   2 -0.5377 1.85131   5
  -9   0  -2 2.71070 1.99389   5
  -9   0   2 0.63342 1.44342   7
  -9   0  -2 -0.6183 1.39804   2
  -9   0  -2 -0.2640 2.47997   8
  -9   0  -2 -0.1674 1.39195   7
 -10   0  -2 462.012 20.3810   9
 -10   0   2 488.411 15.2941  10
 -10   0   2 465.203 20.3797   9
 -10   0  -2 483.189 15.2607  10
 -10   0  -2 448.342 21.1533   8
 -10   0   2 485.795 15.8015   7
 -10   0  -2 485.534 17.0560   2
 -10   0  -2 480.466 15.5305   7
 -10   0   2 487.858 17.0464   2
 -11   0   2 1.83324 1.86312   7
 -11   0  -2 0.89174 2.07156   2
 -11   0   2 0.90774 2.05434   2
 -11   0  -2 0.61432 1.64320  10
 -11   0  -2 0.49256 1.64853   7
 -11   0   2 0.32500 1.56471  10
 -11   0  -2 1.36091 2.92270   9
   0  -1   2 25.4300 1.15406   2
   0  -1  -2 24.5191 1.10172   6
   0  -1   2 22.0535 0.95715   7
   0   1  -2 23.1791 1.09345   6
   0  -1  -2 28.5090 1.44280   8
   0  -1  -2 26.1659 1.07644   9
   0   1  -2 26.9028 1.48393   9
   0  -1   2 24.4519 0.92761  10
   0   1  -2 22.7669 1.59097   8
   0   1   2 28.4701 1.44563   8
   0  -1  -2 28.1832 1.17122   9
   0   1  -2 22.6517 0.95061  10
   0   1  -2 24.3403 1.14956   2
  -1   1   2 115.572 3.32627   7
  -1   1   2 114.570 4.24225   3
   1  -1   2 117.616 4.43798   8
   1   1  -2 126.627 3.66051   6
   1  -1   2 113.823 3.49722   2
  -1   1   2 118.485 3.45953   2
   1   1  -2 112.513 3.98264   1
   1  -1   2 121.876 3.54995   2
   1   1  -2 116.544 3.70819   3
  -1  -1  -2 114.032 4.37503   8
   1  -1   2 113.441 4.05588   9
   1   1  -2 115.364 3.97190   9
  -1   1   2 114.600 4.19409   1
  -1  -1  -2 111.089 3.78000   5
  -1  -1  -2 127.485 3.66385   9
   1  -1   2 113.289 3.23349  10
  -1  -1  -2 116.554 3.91423   1
   1  -1   2 114.426 4.15025   1
  -1   1   2 113.524 3.88631   9
  -1  -1  -2 114.959 3.54905   9
   1   1  -2 111.525 3.33529   7
  -1   1   2 115.113 3.46863   2
  -1   1   2 121.601 3.77190   8
   1   1  -2 117.844 4.42810   8
   1  -1   2 121.559 3.82964   4
   1   1  -2 115.823 3.27161  10
   1  -1   2 111.083 3.32615   7
   1   1  -2 117.680 3.52465   2
  -1   1   2 118.239 3.21593  10
   1  -1  -2 117.794 3.71850   8
   1   1   2 115.209 3.91188   1
  -1   1  -2 116.743 3.80438   4
  -1   1  -2 114.756 3.37352   7
  -1  -1   2 118.272 3.56296   2
  -1   1  -2 116.678 4.15756   9
   1  -1  -2 116.264 3.46871   2
  -1   1  -2 117.065 3.59938   2
   1   1   2 111.330 4.35655   8
  -1  -1   2 124.790 4.05685   1
  -1  -1   2 110.912 3.38461   7
  -1   1  -2 121.695 3.30406  10
   1  -1  -2 118.009 3.36048   7
   1  -1  -2 118.632 3.28502  10
   1  -1  -2 121.479 3.48039   6
   1   1   2 115.332 3.83518   5
  -1  -1   2 120.683 3.32252  10
   1  -1  -2 115.198 3.49581   2
   1  -1  -2 121.110 4.30142   3
  -1   1  -2 117.848 4.48373   8
  -1   1  -2 119.988 4.20607   1
  -1  -1   2 118.220 4.45095   8
   1  -1  -2 114.367 3.89665   9
  -1   1  -2 116.915 3.52918   6
  -1   1  -2 129.595 3.61722   2
   1  -1  -2 116.417 4.15464   1
  -1  -1   2 113.426 3.70396   3
  -1  -1   2 119.375 4.10349   9
   1  -1  -2 114.700 4.23924   1
  -1  -1   2 120.617 3.59167   2
   2   1  -2 17.1015 0.99542   7
  -2  -1  -2 23.8659 2.09756   8
  -2  -1  -2 19.4552 1.33901   1
   2  -1   2 19.7355 1.62199   1
   2   1  -2 17.5022 0.91268  10
   2  -1   2 22.4986 1.49442   5
   2  -1   2 18.6766 1.46245   4
  -2  -1  -2 23.3594 1.59843   9
   2   1  -2 20.5071 1.41751   1
   2  -1   2 22.1457 1.98665   8
   2   1  -2 16.1191 1.16801   2
  -2   1   2 16.9394 1.01829  10
  -2   1   2 18.2036 1.54365   8
   2   1  -2 16.2446 1.38192   5
  -2  -1  -2 18.9634 0.95535   2
  -2   1   2 20.2874 1.28875   2
  -2  -1  -2 13.5762 1.37535   9
   2  -1   2 16.5677 0.91192  10
   2  -1   2 14.2954 1.16290   2
  -2  -1  -2 19.9652 1.33322   4
  -2  -1  -2 14.8888 0.93760   2
   2   1  -2 19.7145 1.92841   8
  -2  -1  -2 17.2940 1.44665   5
  -2   1   2 24.3051 1.81765   9
  -2   1   2 19.1216 1.13003   7
   2  -1   2 15.8553 0.98749   7
  -2   1  -2 14.8848 1.49395   1
   2  -1  -2 17.5352 1.31666   5
  -2  -1   2 16.7790 1.22504   2
   2  -1  -2 19.3496 1.55503   1
   2  -1  -2 17.0852 0.99055  10
  -2   1  -2 17.6219 0.98900  10
  -2  -1   2 15.1530 1.81625   8
  -2   1  -2 20.8880 1.39315   5
   2   1   2 24.7733 2.15699   8
  -2  -1   2 16.9531 1.04150  10
  -2  -1   2 23.4293 1.48451   1
  -2  -1   2 19.4517 1.70686   9
   2  -1  -2 22.9940 1.65064   8
   2  -1  -2 17.8937 1.08543   7
   2   1   2 20.6760 1.32527   1
   2  -1  -2 20.2782 1.69805   9
  -2   1  -2 20.5774 1.51111   4
  -2  -1   2 17.0848 1.18747   2
  -2   1  -2 16.7382 1.10143   7
  -2   1  -2 17.9430 1.23802   2
  -2   1  -2 21.6269 2.04751   8
   2  -1  -2 18.4398 1.24623   2
  -2   1  -2 14.8081 1.17212   2
  -2  -1   2 17.7884 1.07983   7
   2   1   2 16.4056 1.20441   4
   2   1   2 20.6262 1.55600   5
   2  -1  -2 17.6778 1.23969   2
   2  -1  -2 18.0071 1.18504   6
   3  -1   2 309.110 9.21196   1
  -3   1   2 306.214 9.12984   5
  -3  -1  -2 293.675 9.50516   9
  -3  -1  -2 294.522 8.96428   4
   3   1  -2 313.797 9.26544   5
  -3  -1  -2 302.640 7.86603  10
   3  -1   2 301.739 9.22955   4
  -3   1   2 293.327 8.45177   7
   3  -1   2 305.543 9.87838   9
   3  -1   2 310.645 8.67191   2
   3  -1   2 296.218 10.2577   8
  -3  -1  -2 318.265 9.54181   9
   3   1  -2 309.233 9.69969   9
   3  -1   2 312.666 8.19732   7
  -3   1   2 300.656 9.92775   9
  -3  -1  -2 296.659 8.44093   2
   3  -1   2 282.600 9.00841   5
  -3  -1  -2 286.708 8.02252   7
  -3   1   2 293.379 9.76768   8
  -3  -1  -2 307.637 8.40122   1
  -3   1   2 301.145 9.60879   8
  -3  -1  -2 290.034 8.36636   2
  -3   1   2 315.279 8.36224  10
   3   1  -2 287.982 10.2463   8
  -3   1   2 288.929 9.15490   1
  -3  -1  -2 299.270 9.22031   5
   3  -1   2 293.942 7.95362  10
   3   1  -2 278.731 8.60540   1
   3   1  -2 313.870 8.64660   2
  -3  -1  -2 293.835 10.6351   8
  -3   1   2 292.737 8.77330   2
   3   1  -2 297.338 8.56737   1
  -3   1  -2 307.027 9.28976   4
  -3   1  -2 307.673 8.76384   2
   3   1   2 296.654 10.5423   8
   3  -1  -2 298.232 8.18627  10
  -3  -1   2 298.238 10.4517   8
   3  -1  -2 290.648 9.27903   1
   3  -1  -2 290.211 9.68238   8
  -3  -1   2 286.498 8.22744  10
   3   1   2 304.917 8.89990   4
  -3  -1   2 296.168 8.66561   1
  -3  -1   2 305.574 9.26911   5
  -3   1  -2 293.338 9.08574   1
  -3   1  -2 295.481 8.38630   7
  -3  -1   2 291.565 8.35461   7
  -3   1  -2 293.980 9.00247   5
   3   1   2 290.963 8.38262   1
  -3   1  -2 313.886 8.24170  10
   3  -1  -2 301.851 9.05507   5
  -3  -1   2 297.242 8.75380   2
  -3   1  -2 299.148 10.4147   8
  -3  -1   2 292.990 10.0847   8
  -3   1  -2 288.666 8.70794   2
   3  -1  -2 301.847 9.81959   9
   3   1   2 305.975 9.33218   5
  -3   1  -2 285.600 9.84734   9
   3  -1  -2 297.255 9.16894   1
  -3  -1   2 281.681 9.63509   9
   3   1   2 319.331 9.53355   9
   3  -1  -2 300.621 8.76749   2
   3   1   2 321.464 7.96734   2
   4   1  -2 29.2900 1.80485   1
   4  -1   2 26.1557 1.54316   7
  -4  -1  -2 26.9141 1.50941  10
   4   1  -2 39.4482 3.49969   8
   4   1  -2 25.9570 1.58029   7
   4  -1   2 29.5156 2.29164   1
   4   1  -2 35.9704 2.01619   1
  -4  -1  -2 26.0591 1.71519   7
   4  -1   2 35.1964 2.52921   5
  -4  -1  -2 32.7310 2.48603   5
  -4  -1  -2 21.6449 1.80980   2
   4   1  -2 23.6981 1.87172   2
   4  -1   2 33.5542 2.54336   4
  -4   1   2 29.0701 2.33104   5
   4   1  -2 28.6572 2.39606   5
  -4   1   2 31.5874 2.23809   2
   4   1  -2 28.0233 2.69399   9
  -4  -1  -2 32.2646 1.99482   2
  -4   1   2 33.8628 3.02115   8
   4  -1   2 21.9795 2.66700   9
   4   1  -2 34.0607 2.56347   4
  -4  -1  -2 35.9587 2.50385   4
  -4   1   2 28.6573 1.89310   7
  -4   1   2 28.4699 1.78497  10
   4  -1   2 23.8319 1.91528   2
   4  -1   2 28.2322 1.43686  10
  -4   1   2 39.7853 3.28076   9
  -4  -1   2 27.9335 2.35276   5
   4  -1  -2 34.0032 2.65034   4
  -4  -1   2 30.3663 1.87671   7
   4  -1  -2 23.8849 2.13205   1
  -4   1  -2 36.9209 2.66168   4
  -4  -1   2 32.1247 3.29511   8
   4  -1  -2 27.4390 2.82026   9
   4  -1  -2 31.3930 2.34043   5
  -4   1  -2 35.3173 2.43646   5
   4  -1  -2 28.7004 1.68466  10
  -4  -1   2 27.6956 1.73324  10
  -4   1  -2 36.0436 2.29422   2
  -4   1  -2 23.8657 2.07714   1
  -4   1  -2 38.7254 3.49181   8
   4   1   2 29.4133 2.24747   4
   4  -1  -2 25.0130 2.06279   2
  -4  -1   2 31.2050 2.16502   2
  -4  -1   2 40.2597 3.39034   8
   4   1   2 35.0235 1.78897   1
   4   1   2 33.4564 2.58568   5
   4   1   2 40.3027 3.54985   8
  -4   1  -2 37.7692 3.22459   9
  -4   1  -2 30.8992 1.76910  10
   4   1   2 24.5548 1.51714   2
  -4   1  -2 25.3347 1.85947   7
   5   1  -2 59.5365 2.74664   1
   5  -1   2 66.3006 3.23437   2
   5   1  -2 67.0553 3.24725   2
   5  -1   2 56.9997 2.21723  10
  -5  -1  -2 62.7537 2.71685  10
   5  -1   2 66.3969 4.57028   9
  -5   1   2 57.3568 4.42655   9
   5   1  -2 57.8285 3.72284   4
  -5  -1  -2 62.7417 5.21417   8
  -5   1   2 64.8929 3.82074   5
   5  -1   2 62.2925 2.53690   7
   5   1  -2 59.2587 3.74263   5
   5  -1   2 62.0512 3.79198   4
  -5   1   2 60.9447 4.36957   8
  -5   1   2 62.7024 3.51084   2
  -5  -1  -2 61.8140 3.76360   5
  -5  -1  -2 63.0410 3.25015   2
  -5   1   2 67.5619 3.00761  10
   5  -1   2 56.3807 3.37554   1
   5   1  -2 58.6053 4.20498   9
   5  -1   2 56.8993 3.70087   5
  -5  -1  -2 59.9408 2.85967   7
  -5  -1  -2 59.1004 2.42796   1
  -5   1   2 59.5558 4.50367   8
  -5  -1  -2 64.7343 3.98207   2
  -5  -1  -2 61.9414 3.77294   4
  -5   1   2 58.9657 3.39976   1
   5   1  -2 59.5166 2.85984   1
   5  -1   2 64.9580 4.83417   8
   5   1  -2 57.8679 4.79526   8
  -5   1   2 61.8555 3.08690   7
   5   1  -2 61.0398 2.35874  10
  -5  -1  -2 68.3691 4.51359   9
   5   1   2 57.3605 4.85467   8
  -5   1  -2 61.4045 3.33249   1
  -5   1  -2 63.5600 3.68901   5
  -5  -1   2 64.0618 3.88235   5
   5   1   2 62.4594 3.59482   4
  -5   1  -2 63.7284 4.64470   9
   5  -1  -2 62.3040 3.32787   2
  -5  -1   2 59.2216 4.33443   9
  -5  -1   2 60.4926 3.00371   7
   5  -1  -2 56.4487 3.55563   5
   5  -1  -2 65.4926 4.45452   9
  -5   1  -2 63.2320 3.91761   4
   5   1   2 60.2870 2.61406   2
  -5   1  -2 60.4801 4.95592   8
   5   1   2 56.4212 3.77565   5
  -5   1  -2 61.4172 3.40101   2
   5   1   2 56.6080 2.47746   1
  -5   1  -2 65.1977 2.89332  10
  -5   1  -2 66.4255 5.00459   8
  -5   1  -2 64.4082 3.04942   7
   5  -1  -2 60.4401 3.39427   1
  -5  -1   2 65.1672 2.94128  10
  -5  -1   2 59.8232 4.81071   8
  -5  -1   2 63.5002 3.41427   2
   5  -1  -2 64.1501 3.95806   4
  -5  -1   2 57.1635 4.54662   8
   5  -1  -2 55.2542 3.42699   1
   6  -1   2 30.9197 3.02938   4
  -6  -1  -2 36.6861 3.85129   9
  -6  -1  -2 25.6904 1.95372  10
  -6   1   2 28.9290 2.65504   2
   6  -1   2 36.2225 4.12631   8
  -6  -1  -2 37.6922 4.48337   8
  -6  -1  -2 32.1266 3.01488   4
   6  -1   2 23.1503 2.17031   2
  -6  -1  -2 30.0558 2.93374   5
   6   1  -2 23.9792 1.42259  10
   6   1  -2 22.7228 1.65018   7
  -6   1   2 26.6868 2.81988   5
   6  -1   2 22.2162 1.53038   7
  -6   1   2 25.5662 2.08754  10
   6   1  -2 24.6842 3.28604   9
   6  -1   2 17.3309 3.08310   9
  -6   1   2 31.9658 3.75950   8
  -6  -1  -2 31.0509 2.53987   2
  -6   1   2 27.5161 2.29458   7
   6   1  -2 24.6221 2.83812   4
   6  -1   2 26.3822 1.29452  10
   6  -1   2 24.3048 2.34355   1
  -6  -1  -2 22.5714 2.03093   7
   6   1  -2 20.2437 2.11673   2
   6   1   2 37.3338 4.20611   8
   6  -1  -2 17.5999 2.13569   1
  -6   1  -2 36.7724 4.04197   9
  -6   1  -2 26.1492 2.27100   1
  -6  -1   2 24.1473 2.07732  10
   6   1   2 20.0950 1.69658   2
  -6   1  -2 30.8807 2.67802   2
   6  -1  -2 25.3884 1.80664  10
  -6   1  -2 27.2972 2.07854  10
   6  -1  -2 22.7112 3.30814   9
  -6  -1   2 37.9513 3.93087   9
  -6  -1   2 27.5227 2.90324   5
  -6  -1   2 26.8421 2.23445   7
  -6  -1   2 26.6690 2.56295   2
  -6  -1   2 32.9137 4.13976   8
   6  -1  -2 25.7829 2.92104   4
   6   1   2 14.9264 3.52209   9
  -6   1  -2 24.3589 2.16296   7
  -6   1  -2 33.1645 3.17652   4
  -6   1  -2 29.0899 2.80490   5
   6  -1  -2 20.6003 2.24542   2
  -7   1   2 36.3472 2.79906   7
  -7   1   2 32.0924 4.24984   8
  -7   1   2 31.2963 4.20150   9
   7   1  -2 35.6911 1.89540   7
  -7  -1  -2 35.9034 2.52100  10
  -7  -1  -2 36.4808 3.11934   2
  -7  -1  -2 35.1126 2.67288   7
  -7   1   2 33.9953 2.55492  10
  -7   1   2 31.6498 3.40009   5
  -7  -1  -2 38.8972 4.97013   8
   7  -1   2 34.5961 4.30656   8
  -7  -1  -2 27.7139 3.20872   5
  -7  -1  -2 39.3819 4.44080   9
  -7   1   2 31.2481 3.08051   2
  -7   1  -2 33.9795 3.12676   2
   7  -1  -2 32.7581 2.09129  10
  -7   1  -2 35.6810 4.47293   9
  -7  -1   2 35.3225 2.71441   7
   7  -1  -2 36.1523 3.15201   1
  -7  -1   2 33.5192 4.20059   9
  -7   1  -2 36.8931 3.39920   5
  -7  -1   2 33.9006 2.55970  10
  -7   1  -2 34.4169 2.56990  10
  -7  -1   2 34.4004 4.61954   8
   7  -1  -2 33.8524 3.43258   2
  -7   1  -2 36.2633 2.57706   1
  -7  -1   2 37.3100 3.62375   5
  -7   1  -2 39.4805 2.84563   7
  -7   1  -2 32.9231 4.42754   8
   7   1   2 33.5559 4.43804   8
  -7  -1   2 34.3486 3.13065   2
  -8  -1  -2 1.61696 2.14261   9
  -8  -1  -2 0.26441 1.68288   5
   8  -1   2 1.15756 2.06056   8
  -8  -1  -2 1.29161 1.43283   2
  -8   1   2 -0.1879 1.89642   8
  -8   1   2 3.61798 1.82024   5
  -8  -1  -2 0.25800 1.22385   7
  -8  -1  -2 0.71040 1.10484  10
  -8  -1  -2 1.12924 2.32914   8
  -8   1   2 1.06706 1.47887   2
  -8   1   2 1.58728 1.39364   7
  -8   1   2 1.64642 1.24112  10
  -8   1   2 2.77270 2.46939   9
  -8  -1   2 2.24324 1.66997   2
  -8   1  -2 0.78912 1.06375  10
   8   1   2 1.60229 2.26991   8
  -8   1  -2 2.27607 2.15113   9
  -8  -1   2 1.36803 2.21786   8
  -8  -1   2 1.50407 2.14951   9
  -8  -1   2 2.77390 1.87647   5
  -8   1  -2 0.63470 1.29667   7
  -8   1  -2 0.65027 1.69109   5
  -8  -1   2 1.65998 1.34797   7
  -8   1  -2 2.40395 2.38557   8
  -8   1  -2 2.42977 1.60446   2
  -8  -1   2 1.40353 1.27322  10
  -9  -1  -2 23.0902 3.57218   2
  -9   1   2 19.1872 3.32712   2
  -9   1   2 21.1092 3.61136   5
  -9   1   2 20.0889 4.46955   9
  -9   1   2 22.9137 3.12881   7
   9  -1   2 18.0904 4.41541   8
  -9  -1  -2 22.9464 5.20672   8
  -9   1   2 17.8787 2.58202  10
  -9   1   2 20.4697 4.53160   8
  -9  -1  -2 18.1149 3.37623   5
  -9  -1  -2 23.1517 2.81783  10
  -9  -1  -2 17.9205 4.26679   9
  -9  -1  -2 20.2008 2.87400   7
  -9   1  -2 20.7119 4.73948   9
  -9   1  -2 20.0499 2.64267  10
   9   1   2 22.0528 5.01856   8
  -9  -1   2 15.1966 4.25990   8
  -9   1  -2 21.7277 4.97367   8
  -9  -1   2 18.3325 3.65948   5
  -9   1  -2 21.0083 3.62760   5
  -9  -1   2 20.1335 2.72534  10
  -9  -1   2 20.2489 2.94696   7
  -9  -1   2 16.9313 3.27352   2
  -9   1  -2 19.8495 3.32248   2
  -9  -1   2 15.3268 3.94696   9
  -9   1  -2 24.7771 3.12350   7
 -10  -1  -2 2.26727 1.62993  10
 -10   1   2 3.36917 1.97974   7
 -10  -1  -2 3.62304 1.96554   7
 -10  -1  -2 1.40909 2.60653   9
 -10   1   2 4.36114 3.10983   9
 -10  -1  -2 3.92929 2.19755   2
 -10   1   2 3.74035 2.19889   2
 -10   1   2 2.59512 1.66564  10
 -10  -1  -2 5.50632 3.60729   8
 -10  -1   2 5.28133 2.41247   2
 -10   1  -2 4.37087 1.98993   7
 -10  -1   2 2.53185 1.64876  10
 -10   1  -2 3.87592 3.19551   8
 -10  -1   2 3.15668 1.89233   7
 -10   1  -2 0.46831 1.40184  10
 -10   1  -2 3.00807 2.13696   2
 -10   1  -2 4.84680 3.30552   9
 -10  -1   2 5.14309 3.32981   9
 -10  -1   2 4.55993 3.34450   8
 -11   1   2 3.36409 2.51420   2
 -11  -1  -2 5.23304 3.52182   9
 -11  -1  -2 4.63821 2.02537  10
 -11  -1  -2 3.74748 2.30169   2
 -11  -1  -2 5.69701 2.27198   7
 -11   1   2 3.85031 1.89716  10
 -11   1   2 2.76438 2.13491   7
 -11   1  -2 3.94236 3.45349   9
 -11  -1   2 3.62807 3.28387   9
 -11  -1   2 4.51126 1.89782  10
 -11  -1   2 5.50540 2.24418   7
 -11   1  -2 5.47876 2.60165   2
 -11  -1   2 2.98868 2.21439   2
 -11   1  -2 5.83427 2.06659  10
 -11   1  -2 3.19555 2.02882   7
   0   2  -2 3045.76 80.0390   8
   0  -2  -2 2976.00 74.2842   9
   0   2   2 3049.81 77.5461   8
   0  -2   2 3031.69 74.5111  10
   0   2  -2 2871.54 74.2385  10
   0  -2   2 2924.51 74.7322   7
   0   2  -2 3004.92 80.1560   1
   0   2  -2 2946.87 74.3915  10
   0   2   2 2916.21 79.8323   1
   0  -2   2 3018.39 75.4966   9
   0  -2   2 2964.53 75.0977   2
   0   2  -2 2997.47 75.0473   7
   0  -2   2 2984.82 75.8070   2
   0  -2   2 3019.15 74.9713   7
   0  -2  -2 2951.50 78.9762   1
   0  -2  -2 2856.06 77.0625   8
   0  -2   2 3050.81 79.8849   1
   0  -2  -2 2982.82 80.4922   1
   0   2  -2 2949.31 74.5660   2
   0   2  -2 2940.57 74.7861   7
   0  -2  -2 2871.99 75.8356   3
   0  -2  -2 3083.44 74.9202   6
   0  -2  -2 2991.86 74.2865   9
   0   2  -2 3000.89 74.0093   6
   0   2  -2 2886.72 75.5474   2
   1  -2   2 2.63996 0.59342   2
  -1   2   2 1.90081 0.85829   1
   1  -2   2 2.61694 0.73092   4
   1  -2   2 3.69510 0.94454   9
   1  -2   2 1.56965 0.84506   1
   1   2  -2 0.46004 0.63197   1
  -1  -2  -2 2.33520 0.83083   1
  -1  -2   2 0.65753 0.34858  10
  -1   2  -2 0.78470 0.80686   1
  -1  -2   2 1.51625 0.52733   2
   1  -2  -2 1.45140 0.84730   1
  -1   2  -2 4.96933 1.07578   9
  -1  -2   2 0.93280 0.41509   7
  -1   2  -2 1.32053 0.49603   2
  -1  -2   2 0.60654 0.66048   1
  -1   2  -2 1.38090 0.49258   7
  -2  -2  -2 461.726 12.9333   9
   2  -2   2 461.407 12.9240   5
  -2   2   2 453.612 13.7196   1
   2  -2   2 466.957 12.9155   2
  -2  -2  -2 454.838 12.8214   1
  -2  -2  -2 476.386 14.5682   8
  -2   2   2 469.032 13.7262   9
   2  -2   2 472.446 13.7970   1
  -2  -2  -2 462.696 12.8133   1
   2  -2   2 465.619 12.6096   7
   2   2  -2 471.088 13.2283   5
   2   2  -2 463.476 12.1303  10
   2  -2   2 470.354 13.9108   9
   2   2  -2 476.589 12.6393   2
  -2   2   2 470.661 13.0363   8
   2   2  -2 467.659 12.3688   7
  -2   2   2 469.343 12.4315  10
   2  -2   2 460.904 14.1163   8
  -2  -2  -2 485.997 13.0846   9
  -2   2   2 460.056 12.5610   7
   2   2  -2 467.368 14.5010   8
  -2   2   2 463.927 12.8384   2
  -2   2   2 469.712 12.8979   8
   2  -2   2 458.878 13.3210   4
  -2  -2  -2 459.181 12.6822   4
   2   2  -2 445.823 12.9997   1
   2   2  -2 461.419 13.4410   9
   2  -2  -2 499.213 12.6079   6
   2  -2  -2 496.564 13.8749   1
  -2  -2   2 495.036 12.4284  10
  -2   2  -2 499.027 12.9793   2
   2   2   2 508.229 14.6891   8
  -2   2  -2 501.733 13.4334   4
   2   2   2 468.913 12.8616   1
  -2  -2   2 499.265 12.9108   2
  -2   2  -2 490.848 12.9284   5
  -2   2  -2 485.310 14.1319   9
   2  -2  -2 510.125 13.0085   5
  -2   2  -2 476.794 13.8150   1
   2  -2  -2 501.504 13.0677   8
  -2   2  -2 501.829 12.5786  10
  -2  -2   2 499.860 12.8019   2
   2  -2  -2 511.318 13.8087   9
  -2   2  -2 501.930 13.1179   2
  -2  -2   2 491.756 13.3177   5
  -2  -2   2 499.099 12.5126   7
  -2  -2   2 498.501 14.7708   8
  -2   2  -2 492.831 14.3105   8
   2  -2  -2 494.710 12.9111   2
   2  -2  -2 492.033 12.4911  10
  -2  -2   2 507.988 13.8621   9
  -2   2  -2 494.624 14.1390   9
   2  -2  -2 490.199 12.8907   2
   2   2   2 495.054 12.5736   4
  -2  -2   2 517.424 13.1700   1
   3   2  -2 0.39455 0.31688  10
  -3  -2  -2 0.39125 0.44922   1
  -3  -2  -2 1.49125 0.79452   9
   3  -2   2 -0.1130 0.42542  10
   3   2  -2 1.64831 1.11396   8
   3  -2   2 0.58491 0.67871   4
   3   2  -2 0.94782 0.81763   9
   3   2  -2 0.48859 0.53797   1
  -3   2   2 0.70665 0.65671   8
  -3  -2  -2 1.22272 1.10841   8
   3  -2   2 1.31529 0.69216   5
   3  -2   2 0.85825 0.94769   9
  -3  -2  -2 1.28373 1.00788   8
   3  -2   2 0.98505 0.94641   8
  -3   2   2 0.55583 0.56434   2
  -3  -2  -2 0.62320 0.56320   4
  -3   2   2 0.60658 0.70606   8
   3  -2   2 0.93418 0.82468   1
   3   2  -2 0.15940 0.38486   7
   3   2  -2 0.29113 0.38942   7
  -3  -2  -2 0.41807 0.42560   1
  -3  -2  -2 0.47527 0.40494   2
  -3  -2  -2 1.33905 0.77701   5
  -3  -2  -2 0.49202 0.25462   7
  -3   2   2 1.40406 0.80155   1
  -3   2   2 1.11979 0.89225   9
  -3   2   2 0.72212 0.54566   7
  -3   2   2 0.81875 0.49898  10
   3  -2   2 -0.3205 0.50230   7
   3   2  -2 1.20021 0.74173   5
  -3  -2  -2 0.78336 0.45782   2
   3  -2   2 0.64120 0.60852   2
   3   2  -2 0.81730 0.54541   2
  -3   2  -2 0.52956 0.59854   2
   3   2   2 3.17457 1.29190   8
  -3  -2   2 0.58703 0.90319   8
  -3   2  -2 0.36668 0.55566   5
   3  -2  -2 1.14027 0.92056   9
   3   2   2 1.07461 0.55377   4
  -3   2  -2 0.45816 0.72944   1
   3  -2  -2 1.09937 0.77836   1
  -3  -2   2 0.59649 0.52483   2
  -3  -2   2 0.40277 0.63510   5
   3  -2  -2 0.85021 0.45314  10
   3  -2  -2 1.42829 0.65178   2
  -3  -2   2 0.29901 0.44758   7
  -3   2  -2 1.11755 0.50322  10
  -3   2  -2 0.60582 0.87340   8
   3  -2  -2 0.80653 0.63836   5
   3   2   2 0.97988 0.69514   5
  -3   2  -2 0.52765 0.89884   9
  -3  -2   2 0.15686 0.50785   2
   3   2   2 0.68833 0.48307   1
  -3   2  -2 1.02796 0.80251   4
  -3  -2   2 0.30709 0.42416  10
  -3  -2   2 1.03305 0.97801   8
  -3  -2   2 0.32946 0.50319   1
  -3  -2   2 0.62382 0.76904   9
  -3   2  -2 -0.4016 0.55233   7
  -4   2   2 646.632 18.9772   8
  -4   2   2 638.506 17.2483   7
   4   2  -2 647.394 17.1955   2
  -4   2   2 643.602 18.7286   8
   4  -2   2 618.108 18.2820   1
   4  -2   2 638.274 19.5649   8
  -4   2   2 650.966 17.0520  10
   4   2  -2 648.696 18.7730   9
  -4  -2  -2 623.714 16.6268   7
  -4  -2  -2 652.956 20.7330   8
  -4   2   2 640.872 19.3971   9
   4   2  -2 665.509 16.9688   1
  -4  -2  -2 624.086 17.1195   2
  -4   2   2 637.941 17.7781   2
  -4  -2  -2 632.198 16.4311  10
  -4  -2  -2 648.620 18.5401   9
   4   2  -2 644.888 18.3421   5
  -4  -2  -2 642.187 18.2942   5
   4  -2   2 634.982 18.3749   4
  -4   2   2 642.556 18.3860   1
   4   2  -2 654.189 20.2923   8
   4   2  -2 634.567 16.7409   1
   4  -2   2 654.991 19.4275   9
   4   2  -2 625.876 18.1183   4
   4  -2   2 632.106 17.9754   5
  -4   2   2 657.544 18.0468   5
   4  -2   2 647.605 17.6115   2
  -4  -2  -2 645.962 18.7296   9
   4   2  -2 626.035 16.1930  10
   4  -2   2 608.971 16.6672  10
   4   2  -2 645.309 16.5715   7
  -4  -2  -2 643.097 17.1981   2
  -4  -2  -2 636.981 20.3460   8
  -4  -2  -2 634.186 17.9223   4
  -4   2  -2 649.878 17.8904   5
   4   2   2 627.001 18.3725   5
  -4  -2   2 624.043 17.5863   2
  -4  -2   2 640.964 18.3500   5
  -4   2  -2 645.325 18.4852   4
  -4   2  -2 656.224 19.9322   8
   4  -2  -2 636.764 18.4839   4
  -4  -2   2 628.458 17.0210   7
   4  -2  -2 633.940 16.8605  10
   4  -2  -2 636.554 17.9150   5
  -4  -2   2 634.658 18.9899   9
   4  -2  -2 643.465 19.2149   9
   4  -2  -2 642.219 17.7342   2
  -4   2  -2 637.429 18.2619   1
  -4   2  -2 638.568 17.8039   2
  -4   2  -2 623.948 17.1596   7
   4   2   2 652.931 17.7202   4
  -4  -2   2 662.985 16.9786  10
   4  -2  -2 654.308 19.0430   1
   4   2   2 654.680 20.3896   8
  -4   2  -2 648.356 19.6276   9
  -4  -2   2 651.626 20.4139   8
  -4  -2   2 650.373 19.9462   8
  -4   2  -2 664.304 17.0647  10
   5   2  -2 1.04851 1.14027   5
  -5   2   2 0.56996 1.39668   9
   5  -2   2 1.67830 1.44609   8
   5  -2   2 0.25200 0.80785   2
   5   2  -2 0.22351 0.98242   4
   5   2  -2 -0.1999 0.53536   7
  -5   2   2 0.27428 0.94230   1
  -5   2   2 0.44515 1.13973   8
  -5  -2  -2 0.34264 0.60345  10
   5   2  -2 -0.1943 0.70172   2
  -5  -2  -2 0.10731 0.77774   7
   5   2  -2 0.39907 0.53337   1
  -5  -2  -2 0.36743 1.11745   9
  -5   2   2 0.18274 1.07882   8
  -5  -2  -2 0.10839 0.89900   4
   5  -2   2 0.31336 1.29515   9
  -5  -2  -2 0.51374 0.72729   2
  -5   2   2 0.38028 0.71005  10
  -5   2   2 0.09679 0.86436   2
   5   2  -2 0.01684 1.26561   9
  -5   2   2 -0.2295 0.76133   7
   5   2  -2 0.61770 1.39268   8
  -5  -2  -2 -0.2212 0.94247   5
  -5   2   2 0.40221 1.02134   5
   5  -2   2 0.12708 0.89147   4
   5   2  -2 0.30286 0.53593   7
  -5  -2  -2 -0.7592 1.29053   8
  -5  -2  -2 0.17165 0.76638   2
   5  -2   2 0.60700 0.59772  10
   5   2  -2 -0.3376 0.38473  10
   5  -2   2 0.34977 0.91598   5
  -5   2  -2 -0.1343 1.27437   8
   5  -2  -2 0.29712 1.14323   9
   5  -2  -2 -0.2689 0.64528  10
  -5  -2   2 0.06540 0.97079   5
  -5  -2   2 0.23947 1.30063   8
  -5   2  -2 -0.1140 0.88084   5
   5  -2  -2 0.50344 1.00095   1
  -5   2  -2 0.04034 0.82750   2
  -5   2  -2 0.11035 0.96686   4
  -5   2  -2 -0.0692 0.80543   7
  -5  -2   2 -0.1545 0.81508   2
  -5  -2   2 0.60115 1.20660   9
   5   2   2 0.02158 1.35667   8
   5  -2  -2 -0.2914 1.00777   4
   5  -2  -2 0.37312 0.96331   5
  -5  -2   2 0.21771 0.71234  10
  -5   2  -2 0.34621 0.71548  10
   5  -2  -2 0.97396 0.94408   2
  -5   2  -2 0.17166 0.93737   1
   5   2   2 0.70150 1.13049   5
  -5  -2   2 0.23705 0.74172   7
  -5   2  -2 0.20291 1.27469   9
  -5  -2   2 -0.3076 1.27292   8
   5   2   2 -0.2184 0.82561   4
  -6   2   2 1705.24 44.5473   2
   6  -2   2 1753.77 44.0831   2
  -6  -2  -2 1670.45 42.9450  10
   6  -2   2 1698.18 45.3897   4
  -6  -2  -2 1706.01 44.0311   2
   6  -2   2 1697.21 46.9279   9
  -6  -2  -2 1691.97 43.2228   7
  -6   2   2 1717.01 47.2530   9
   6   2  -2 1649.07 42.0040   7
   6   2  -2 1719.31 43.4595   2
  -6  -2  -2 1745.63 49.2515   8
  -6  -2  -2 1715.12 45.3159   5
  -6   2   2 1754.67 44.7366   1
   6  -2   2 1693.99 47.2691   8
   6  -2   2 1615.84 42.3823  10
  -6   2   2 1751.26 45.0350   5
   6   2  -2 1661.49 46.0297   9
  -6   2   2 1686.59 46.4291   8
  -6   2   2 1713.57 46.9758   8
  -6   2   2 1705.67 43.3891  10
  -6   2   2 1737.42 43.7533   7
  -6  -2  -2 1710.70 46.6053   9
   6  -2  -2 1667.00 45.5115   4
   6  -2  -2 1712.67 46.8391   9
  -6   2  -2 1710.22 47.9462   8
  -6   2  -2 1657.12 43.5501   7
  -6   2  -2 1666.03 47.3147   9
   6   2   2 1713.30 48.4798   8
  -6   2  -2 1696.41 44.8039   5
   6  -2  -2 1676.65 44.2387   2
  -6  -2   2 1661.71 44.2894   2
  -6   2  -2 1650.62 44.5430   2
   6  -2  -2 1660.27 44.8301   1
  -6   2  -2 1631.93 45.3824   4
   6  -2  -2 1698.28 42.9191  10
  -6  -2   2 1650.51 46.5224   9
  -6  -2   2 1717.40 43.3177  10
  -6  -2   2 1678.47 43.4826   7
  -6  -2   2 1647.46 48.3502   8
  -6   2  -2 1674.00 44.3854   1
  -6  -2   2 1699.54 45.3624   5
  -6   2  -2 1635.54 43.2928  10
  -7  -2  -2 0.32021 1.57171   9
  -7  -2  -2 -0.3303 1.21350   5
   7  -2   2 -0.7446 1.36195   8
  -7  -2  -2 -0.4783 0.99084   2
  -7   2   2 -0.5802 1.39447   8
  -7   2   2 0.93677 1.75448   9
  -7   2   2 0.15506 1.05287   1
  -7  -2  -2 0.19360 0.86746  10
  -7   2   2 0.81060 1.31468   5
  -7  -2  -2 -0.3576 1.86855   8
  -7   2   2 -0.0036 0.97601   7
  -7   2   2 -0.3575 1.09317   2
  -7  -2  -2 0.22008 1.00523   7
  -7   2   2 -0.2009 0.85446  10
  -7   2  -2 -0.2859 0.98801   7
  -7   2  -2 -0.6359 1.04344   2
  -7  -2   2 -0.7209 1.38843   9
  -7   2  -2 0.61859 1.70050   9
  -7  -2   2 -0.3951 0.88163   7
   7  -2  -2 0.00643 0.80444  10
  -7  -2   2 -0.4142 0.81780  10
  -7  -2   2 0.50961 1.67437   8
  -7   2  -2 -0.6467 0.82347  10
   7  -2  -2 -0.2470 1.01987   1
  -7   2  -2 1.59245 1.90709   8
   7  -2  -2 -1.6062 2.21505   9
  -7  -2   2 0.36282 1.33187   5
   7   2   2 -0.6694 1.58961   8
   7  -2  -2 -0.6563 1.05926   2
  -7  -2   2 -0.2010 0.99349   2
  -7   2  -2 -0.0671 1.00295   1
  -7   2  -2 1.08540 1.32974   5
  -8  -2  -2 933.927 26.1927   7
  -8  -2  -2 958.834 32.8831   8
  -8   2   2 943.061 28.2713   5
  -8  -2  -2 959.031 27.4362   2
  -8  -2  -2 945.000 25.9687  10
   8  -2   2 960.180 31.2218   8
  -8   2   2 952.208 26.6655   7
  -8  -2  -2 939.266 30.5721   9
  -8   2   2 954.631 30.9481   8
  -8  -2  -2 955.811 28.5462   5
  -8   2   2 948.010 27.7648   2
  -8   2   2 951.829 31.2028   9
  -8   2   2 944.645 26.2233  10
  -8  -2   2 997.205 28.9100   5
  -8  -2   2 971.799 26.2459  10
   8   2   2 964.694 32.1494   8
  -8   2  -2 959.176 26.2910  10
  -8  -2   2 973.040 30.7089   9
  -8   2  -2 966.880 26.5880   7
  -8   2  -2 965.643 31.9119   8
  -8   2  -2 978.287 28.2294   5
  -8   2  -2 940.915 27.8235   2
  -8  -2   2 978.509 27.7017   2
  -8  -2   2 949.891 26.5000   7
   8  -2  -2 926.789 25.0698  10
  -8   2  -2 968.760 31.5040   9
  -8  -2   2 976.031 32.5612   8
  -9  -2  -2 0.67943 2.20849   9
  -9  -2  -2 1.45063 2.68712   8
  -9   2   2 0.67842 2.26874   8
  -9   2   2 0.58422 1.60912   2
  -9   2   2 -0.7811 1.60705   5
  -9  -2  -2 0.33895 1.41717   7
   9  -2   2 -0.9546 2.12447   8
  -9  -2  -2 1.49813 1.64255   2
  -9   2   2 0.18530 1.29041  10
  -9  -2  -2 1.52798 1.37831  10
  -9   2   2 0.80005 1.46728   7
  -9   2   2 1.65581 2.43105   9
  -9  -2   2 0.01087 1.30645  10
  -9  -2   2 -0.8697 2.10214   9
  -9  -2   2 -0.1344 1.37227   7
  -9   2  -2 -0.5276 1.72226   5
  -9   2  -2 -1.1111 2.28097   8
  -9   2  -2 0.88599 1.33566  10
  -9  -2   2 -1.0361 2.30117   8
  -9   2  -2 -1.8093 1.37102   2
  -9   2  -2 -0.2262 1.36856   7
  -9  -2   2 0.40560 1.69535   2
  -9   2  -2 0.04540 2.29205   9
 -10   2   2 41.1849 3.68476  10
 -10   2   2 46.6286 4.10175   7
 -10   2   2 36.2508 4.39664   2
 -10  -2  -2 42.7855 4.41126   2
 -10  -2  -2 40.1466 7.03469   8
 -10  -2  -2 42.8600 6.09388   9
 -10  -2  -2 47.1052 3.72370  10
 -10  -2  -2 45.8345 3.92236   7
 -10  -2   2 48.4803 4.15049   7
 -10  -2   2 44.2518 4.56703   2
 -10  -2   2 43.5506 3.75083  10
 -10   2  -2 43.0412 4.65954   2
 -10  -2   2 47.5137 6.89904   8
 -10   2  -2 49.3548 4.08441   7
 -10  -2   2 44.7155 6.23558   9
 -10   2  -2 47.7008 6.80603   8
 -10   2  -2 44.6691 6.50250   9
 -10   2  -2 47.3449 3.86576  10
 -11  -2  -2 -0.2840 2.70898   9
 -11   2   2 -1.3591 1.61226   7
 -11  -2  -2 0.27498 1.54356  10
 -11  -2  -2 2.94406 1.90350   7
 -11   2   2 -1.1260 1.43818  10
 -11  -2  -2 -0.0409 1.83123   2
 -11   2  -2 0.27718 1.67544   7
 -11  -2   2 -0.0096 1.80731   2
 -11  -2   2 1.63152 1.94341   7
 -11  -2   2 -1.0825 1.43593  10
 -11   2  -2 1.25615 2.10331   2
 -11  -2   2 1.25136 2.78504   9
 -11   2  -2 0.66712 1.54941  10
   0   3  -2 19.4471 1.52951   9
   0  -3  -2 20.0523 0.80301   9
   0  -3   2 14.9957 0.89313   7
   0   3  -2 19.1520 1.08462   2
   0   3  -2 13.8999 0.94854   2
   0  -3   2 14.9213 1.04227   2
   0   3   2 20.4064 1.70739   1
   0   3  -2 14.0608 1.67476   1
   0   3  -2 15.5620 0.97166   6
   0  -3   2 14.6720 1.66989   1
   0  -3  -2 18.7754 1.00943   6
   0  -3   2 17.8888 1.10809   2
   0  -3  -2 22.1658 1.73708   3
   0  -3   2 17.8018 1.77665   8
   0  -3   2 16.6689 0.94515   7
   0  -3  -2 19.3238 1.61512   1
   0  -3   2 16.7316 0.84339  10
   0   3  -2 16.8322 0.84655   7
   0   3  -2 15.8386 1.23492   4
   0   3  -2 13.4004 1.59425   8
   1  -3   2 21.1736 1.38841   2
  -1   3   2 21.9820 0.87992   2
  -1  -3  -2 22.4310 1.65625   1
  -1  -3  -2 21.2008 1.43820   5
   1   3  -2 20.9139 1.32266   5
   1  -3   2 22.3939 1.80551   9
  -1   3   2 19.8487 1.44899   9
   1   3  -2 23.2602 1.11149   2
  -1  -3  -2 19.5347 1.88967   8
   1  -3   2 20.3866 1.52488   4
   1  -3   2 21.8620 1.97663   8
   1   3  -2 23.1985 2.12327   8
  -1   3   2 21.4833 1.86722   1
   1  -3   2 24.3297 1.39919   2
  -1  -3  -2 21.5918 1.87553   8
  -1  -3  -2 21.0579 1.70188   1
   1  -3   2 23.8423 2.10121   1
   1   3  -2 22.3273 0.79702   7
   1   3  -2 21.3025 1.28612   6
  -1   3   2 22.2876 0.86748   2
   1   3  -2 24.3500 1.81767   1
   1  -3   2 20.1955 1.09096  10
   1  -3   2 20.9402 1.16600   7
  -1   3  -2 20.6366 1.85184   9
  -1  -3   2 19.6953 2.05810   8
  -1   3  -2 19.9060 1.16743   7
  -1   3  -2 21.1955 1.27997   2
   1  -3  -2 19.2206 1.85794   1
   1  -3  -2 19.0863 0.95118   6
   1   3   2 15.9069 1.66889   8
  -1   3  -2 18.2317 1.87854   8
  -1  -3   2 17.2918 1.50296   9
   1  -3  -2 19.2516 1.44787   9
   1   3   2 19.6522 1.60264   1
   1  -3  -2 19.8242 0.76265   7
  -1   3  -2 22.7444 1.97094   1
  -1  -3   2 19.2787 0.94016   7
  -1  -3   2 19.0736 1.63997   9
  -1   3  -2 21.5868 1.54460   4
   1  -3  -2 19.9729 1.05950   2
  -1   3  -2 20.7561 1.41222   2
  -1  -3   2 23.6611 1.85500   1
  -1  -3   2 19.2605 1.10606   2
  -1  -3   2 22.4056 1.23808   2
  -1  -3   2 22.3171 0.93021  10
   1  -3  -2 19.7441 0.76373   7
   1  -3  -2 19.1176 1.84204   3
  -1   3  -2 20.7738 1.09838   6
   1  -3  -2 18.4165 1.00473   2
  -1   3  -2 19.6265 1.40194   2
  -1   3  -2 19.3792 1.08135  10
  -1  -3   2 20.8959 1.00964   7
   1  -3  -2 20.6354 1.42181   9
   1   3   2 19.2605 1.41436   5
  -2  -3  -2 92.6551 3.26490   1
  -2   3   2 88.0162 2.85503   8
   2  -3   2 66.7941 3.01732   2
   2   3  -2 89.9655 4.54836   8
   2   3  -2 72.7442 3.23607   1
  -2   3   2 77.6310 2.66856   7
  -2  -3  -2 95.2421 3.05311   9
  -2  -3  -2 88.0658 3.46680   5
   2  -3   2 81.4983 3.49522   4
   2  -3   2 87.1139 3.03364   5
   2  -3   2 72.5913 2.68992  10
   2  -3   2 66.1166 3.74826   1
  -2  -3  -2 82.6426 2.73715   4
   2  -3   2 94.5965 4.19200   8
  -2   3   2 74.2482 2.54647  10
  -2   3   2 96.1719 4.19608   1
  -2   3   2 81.2958 3.02793   2
  -2   3  -2 85.4249 4.06929   8
  -2  -3   2 72.3510 2.90227   2
   2  -3  -2 83.3523 2.68068  10
  -2  -3   2 95.6758 4.11196   9
  -2   3  -2 92.7888 4.21855   9
   2  -3  -2 75.8378 2.63249   6
  -2  -3   2 79.6650 3.34318   5
  -2  -3   2 76.6885 2.57272   7
   2   3   2 82.8185 3.45981   5
  -2   3  -2 69.7471 2.78912   7
  -2  -3   2 83.6273 2.89178   2
  -2  -3   2 76.0780 3.63852   9
   2  -3  -2 77.3076 2.97325   2
  -2   3  -2 71.7727 2.75203  10
  -2  -3   2 85.4844 2.59397  10
  -2   3  -2 86.9838 2.97233   5
  -2   3  -2 80.7990 3.28717   2
   2  -3  -2 77.5324 3.88315   1
  -2  -3   2 74.4564 2.63607   7
  -2  -3   2 85.7867 3.38386   1
   2  -3  -2 78.3854 2.96707   5
  -3   3   2 483.340 13.1218   7
   3  -3   2 482.772 13.5537   5
   3   3  -2 492.417 14.0931   5
  -3  -3  -2 470.069 12.9675   1
  -3   3   2 479.016 13.8326   8
  -3   3   2 461.316 13.6583   8
   3   3  -2 460.475 15.6466   8
   3   3  -2 486.526 14.2237   9
  -3  -3  -2 496.179 13.8700   9
   3  -3   2 502.906 13.6976   2
  -3   3   2 467.442 14.6193   1
  -3   3   2 485.971 12.9635  10
  -3   3   2 480.683 13.5795   2
   3  -3   2 488.658 12.9465  10
  -3  -3  -2 475.488 16.0133   8
  -3  -3  -2 478.826 15.7642   8
   3  -3   2 483.854 14.2302   4
  -3  -3  -2 484.143 14.1028   5
  -3   3   2 485.041 14.9130   9
   3   3  -2 531.914 13.4166   1
   3  -3   2 513.284 15.1576   9
  -3  -3  -2 512.454 12.6461   2
  -3  -3  -2 469.305 13.7910   9
   3  -3   2 471.349 14.8862   8
  -3  -3  -2 487.229 12.9665   1
  -3  -3  -2 497.386 12.5928   2
  -3  -3  -2 479.361 13.4065   4
   3  -3  -2 504.092 13.6235   2
  -3   3  -2 486.987 15.1598   8
  -3   3  -2 494.792 14.2434   4
  -3  -3   2 491.918 14.6049   9
  -3  -3   2 487.777 16.0084   8
  -3   3  -2 480.446 15.1795   9
   3   3   2 480.819 14.1700   5
   3  -3  -2 499.741 14.7719   9
   3  -3  -2 499.945 13.5754   5
   3  -3  -2 474.631 14.1127   4
   3   3   2 482.019 15.7646   8
  -3   3  -2 502.197 13.1197  10
  -3   3  -2 514.362 14.8834   1
   3  -3  -2 481.338 12.9463  10
  -3   3  -2 499.600 13.8658   2
  -3  -3   2 496.781 13.4533   2
  -3  -3   2 483.358 13.2900   1
  -3  -3   2 494.503 14.1284   5
  -3  -3   2 481.553 12.8793   7
  -3   3  -2 510.250 13.2410   7
  -3  -3   2 473.336 13.2301   2
  -3  -3   2 496.453 12.8124  10
   3   3   2 500.577 13.1371   4
  -3   3  -2 503.935 13.5257   5
  -4   3   2 18.6878 1.90011   5
  -4  -3  -2 19.2000 1.19554   7
  -4   3   2 25.9196 2.93529   9
   4   3  -2 21.9497 2.15406   5
  -4   3   2 27.6156 2.51188   8
  -4   3   2 29.6736 2.70311   1
  -4  -3  -2 33.3145 3.54228   8
   4   3  -2 20.5118 1.48574   1
  -4  -3  -2 19.6112 2.17933   9
  -4   3   2 29.5307 2.47461   8
   4   3  -2 29.1653 3.37356   8
  -4   3   2 21.2071 1.71918   7
   4  -3   2 18.1782 1.92466   2
  -4  -3  -2 26.3683 2.09706   4
   4   3  -2 19.7333 2.32242   9
  -4  -3  -2 25.0912 2.34673   5
  -4  -3  -2 17.9939 1.52701   2
  -4  -3  -2 25.7906 1.66895   2
  -4  -3  -2 22.3920 1.03486  10
   4  -3   2 30.8684 2.95830   8
   4  -3   2 17.9295 1.51444  10
  -4   3   2 23.0350 2.09335   2
  -4   3   2 20.3711 1.61087  10
   4  -3   2 24.0697 2.04876   5
   4  -3   2 22.8214 2.32241   4
  -4  -3   2 21.8640 1.51659  10
   4  -3  -2 23.9013 2.40300   4
  -4  -3   2 25.0191 3.25140   8
  -4   3  -2 18.8393 2.28518   1
  -4  -3   2 26.2353 2.66751   9
  -4   3  -2 19.3143 1.73988   7
   4   3   2 26.6611 2.45996   5
  -4   3  -2 23.6205 1.69769  10
  -4   3  -2 27.9255 2.97647   8
  -4   3  -2 30.4236 2.60982   4
  -4   3  -2 23.2722 1.97295   5
   4   3   2 30.9849 3.41523   8
  -4   3  -2 30.4471 3.18023   9
  -4  -3   2 21.3696 1.56510   7
  -4  -3   2 31.8174 3.32279   8
   4  -3  -2 22.8021 1.62226  10
  -4  -3   2 24.2555 2.27541   5
  -4  -3   2 22.7617 1.91148   2
   4  -3  -2 22.2518 1.96518   5
  -4   3  -2 23.9804 2.13656   2
   4   3   2 21.7971 1.78695   4
   4  -3  -2 20.4014 1.96594   2
  -4  -3   2 23.6006 1.84625   2
   4  -3  -2 19.7971 2.62469   9
  -5   3   2 125.041 6.92113   9
   5  -3   2 135.394 5.71820   5
   5   3  -2 130.495 5.74380   4
   5   3  -2 133.787 4.73338   2
  -5   3   2 135.643 4.91028  10
  -5  -3  -2 137.903 6.21271   9
   5  -3   2 140.329 7.12652   9
   5  -3   2 137.951 7.01069   8
  -5   3   2 126.753 6.27117   8
  -5   3   2 128.503 5.02293   7
  -5   3   2 130.438 6.44903   8
  -5  -3  -2 137.323 5.07116   2
  -5  -3  -2 138.039 6.09231   5
  -5   3   2 131.226 6.10524   1
  -5   3   2 131.466 5.69352   5
  -5  -3  -2 134.731 6.44455   9
  -5   3   2 130.498 5.57072   2
   5  -3   2 135.830 5.52478   2
   5  -3   2 136.356 6.19209   4
  -5  -3  -2 129.856 5.00029   2
   5   3  -2 133.609 6.35825   9
  -5  -3  -2 135.881 4.34763  10
  -5  -3  -2 135.865 5.73848   4
   5  -3   2 129.570 4.55407  10
  -5  -3  -2 130.496 7.93027   8
  -5  -3   2 136.519 4.77588  10
  -5   3  -2 141.937 6.21547   1
  -5   3  -2 139.824 7.27874   8
  -5  -3   2 133.798 6.08918   5
  -5  -3   2 129.631 7.71729   8
   5   3   2 138.969 5.43387   4
  -5  -3   2 137.960 4.86797   7
   5  -3  -2 135.157 6.19891   4
   5  -3  -2 144.526 7.05249   9
  -5   3  -2 141.587 5.79401   2
  -5   3  -2 135.596 5.06175   7
  -5   3  -2 139.472 7.33911   9
   5  -3  -2 146.190 5.76004   5
  -5   3  -2 147.848 6.38300   4
  -5  -3   2 133.498 6.58515   9
   5  -3  -2 130.093 4.67966  10
   5   3   2 133.020 7.69974   8
  -5  -3   2 132.733 5.39178   2
   5  -3  -2 142.812 5.63778   2
  -5   3  -2 138.958 5.63418   5
  -5   3  -2 140.189 4.99229  10
  -6   3   2 6.23243 2.08120   8
   6   3  -2 3.63590 1.07552   2
  -6   3   2 5.49658 1.60008   2
  -6  -3  -2 4.97849 1.08263  10
   6  -3   2 5.50152 2.08573   8
   6  -3   2 4.63358 0.98792  10
  -6   3   2 6.02732 2.01667   8
   6  -3   2 5.21314 1.73658   4
  -6   3   2 5.31365 2.13020   9
  -6  -3  -2 5.27110 1.34124   2
  -6   3   2 3.99722 1.25777   7
  -6  -3  -2 2.92730 1.17121   2
  -6  -3  -2 4.15843 1.63442   5
  -6   3   2 5.54665 1.75041   1
   6  -3   2 2.93374 1.26555   2
  -6  -3  -2 4.04569 1.17157   7
  -6  -3  -2 7.77109 2.88023   8
  -6   3   2 6.97245 1.72575   5
  -6   3   2 3.56481 1.08864  10
   6  -3   2 2.44363 1.78053   9
  -6  -3  -2 3.90549 1.79826   9
  -6   3  -2 5.60714 2.21842   9
  -6   3  -2 3.80045 1.41220   2
  -6   3  -2 6.40276 1.95515   4
  -6   3  -2 5.17403 1.31868   7
  -6  -3   2 5.03325 1.43680   2
   6  -3  -2 3.96424 1.62095   4
   6   3   2 3.21592 2.12838   8
  -6  -3   2 4.85275 2.29225   8
  -6  -3   2 3.96437 1.17954   7
   6  -3  -2 6.03447 2.00165   9
  -6   3  -2 3.65448 1.46647   1
  -6   3  -2 4.05018 1.14233  10
   6  -3  -2 4.01364 1.10248  10
  -6  -3   2 3.79325 1.53560   5
  -6  -3   2 4.67704 1.11641  10
  -6  -3   2 7.19472 2.28021   9
  -6   3  -2 5.22845 2.10973   8
  -6   3  -2 4.31675 1.52814   5
   6  -3  -2 4.81745 1.45435   2
  -7  -3  -2 51.0378 4.78755   9
  -7   3   2 51.9841 3.90671   2
  -7   3   2 57.1310 3.29384  10
  -7  -3  -2 52.8792 5.96383   8
  -7   3   2 49.3094 4.71605   8
   7  -3   2 55.2641 5.17394   8
  -7  -3  -2 55.2986 4.31040   5
   7  -3   2 53.6239 2.60114  10
  -7   3   2 50.6383 3.87839   1
  -7   3   2 55.8334 4.07066   5
  -7  -3  -2 54.0641 3.13508   7
  -7  -3  -2 53.2159 3.54376   2
  -7   3   2 50.3113 5.27283   9
  -7   3   2 56.3748 3.46969   7
  -7  -3  -2 58.6135 3.04467  10
  -7   3  -2 51.8988 3.96439   2
  -7  -3   2 54.7626 5.90741   8
   7  -3  -2 54.3045 5.09796   9
   7   3   2 53.1955 5.65336   8
  -7   3  -2 54.4711 3.27432  10
  -7   3  -2 48.5882 3.84692   5
  -7  -3   2 53.6281 3.16100  10
  -7  -3   2 52.0820 3.24565   7
  -7   3  -2 54.1449 5.32331   8
  -7   3  -2 54.5956 3.40732   7
  -7   3  -2 49.9956 5.24785   9
   7  -3  -2 57.1287 3.87127   2
  -7  -3   2 50.1136 4.84250   9
   7  -3  -2 52.8756 4.07804   1
  -7   3  -2 53.3184 3.88287   1
  -7  -3   2 51.6534 4.26152   5
  -7  -3   2 50.4496 3.64649   2
   8  -3   2 2.04268 2.10670   8
  -8   3   2 0.33922 1.46344   5
  -8   3   2 -0.4603 1.08202  10
  -8  -3  -2 0.45054 1.08020  10
  -8   3   2 1.70425 1.43195   7
  -8  -3  -2 0.31689 2.38311   8
  -8  -3  -2 1.07272 1.28123   7
  -8   3   2 0.06138 1.46902   2
  -8  -3  -2 -0.6014 1.61367   5
  -8  -3  -2 1.11888 1.42485   2
  -8   3   2 0.17433 1.99788   8
  -8  -3  -2 1.44588 2.09095   9
  -8   3   2 1.14151 2.08877   9
  -8  -3   2 1.47456 1.47072   2
  -8   3  -2 2.15420 1.36497   7
  -8  -3   2 0.86060 1.19779  10
   8   3   2 -0.9229 2.12504   8
  -8   3  -2 1.10888 1.22729  10
  -8  -3   2 1.27496 1.72711   5
  -8   3  -2 1.30337 1.69434   5
  -8  -3   2 1.40169 2.09141   9
  -8   3  -2 1.14660 2.17041   9
  -8   3  -2 1.70975 1.54444   2
  -8  -3   2 1.34458 2.33355   8
  -8   3  -2 1.73809 2.18460   8
  -8  -3   2 1.11393 1.20216   7
   8  -3  -2 0.46930 1.04899  10
  -9  -3  -2 41.8369 6.55673   8
   9  -3   2 38.4856 5.37230   8
  -9  -3  -2 41.4667 3.44607   7
  -9   3   2 36.7677 3.27164  10
  -9   3   2 37.0669 3.50779   7
  -9   3   2 30.9982 3.95047   2
  -9  -3  -2 42.0226 4.01880   2
  -9   3   2 32.9471 5.66354   9
  -9  -3  -2 41.6062 5.50717   9
  -9  -3  -2 43.0327 3.34716  10
  -9  -3   2 44.1073 6.26615   8
  -9   3  -2 37.0561 4.30093   5
  -9   3  -2 39.5358 3.52467   7
  -9  -3   2 40.6640 3.38486  10
  -9  -3   2 35.9155 3.94293   2
  -9   3  -2 41.4478 4.26673   2
  -9   3  -2 44.5055 3.48233  10
  -9  -3   2 41.7666 3.56330   7
  -9  -3   2 39.1801 5.27673   9
  -9   3  -2 46.3961 6.25326   9
  -9   3  -2 42.5865 5.85747   8
 -10   3   2 0.31442 1.49772  10
 -10  -3  -2 1.36922 1.81624   2
 -10  -3  -2 1.07542 1.48124  10
 -10   3   2 0.82106 1.73269   7
 -10  -3  -2 2.00287 2.69689   9
 -10  -3  -2 2.05309 1.70840   7
 -10   3   2 4.37528 3.24535   2
  10  -3   2 2.03193 2.81065   8
 -10   3  -2 1.94463 1.63064  10
 -10  -3   2 2.13886 1.72990  10
 -10  -3   2 1.74932 3.03277   8
 -10  -3   2 1.03659 1.91537   2
 -10  -3   2 -0.8315 1.50251   7
 -10   3  -2 1.60151 1.65079   7
 -10   3  -2 0.43527 1.83776   2
 -10   3  -2 1.28083 3.06527   9
 -10  -3   2 3.74333 2.86777   9
 -11  -3  -2 5.28558 3.53995   9
 -11  -3  -2 6.84615 2.29657   7
 -11  -3  -2 6.49521 2.11854  10
 -11   3   2 4.62371 2.06800  10
 -11   3   2 7.07336 2.46359   7
 -11  -3  -2 6.50914 2.61210   2
 -11  -3   2 6.22959 2.27384   7
 -11  -3   2 8.89424 2.31890  10
 -11   3  -2 6.09573 2.80750   2
 -11  -3   2 6.93589 2.70497   2
 -11  -3   2 7.62391 3.71766   9
 -11   3  -2 7.80046 2.44026   7
 -11   3  -2 5.73913 2.14077  10
   0  -4   2 2179.61 54.3145  10
   0  -4  -2 2220.02 55.6436   1
   0  -4   2 2158.03 54.1190   2
   0  -4   2 2196.16 55.2255   9
   0   4  -2 2202.78 54.3505   2
   0   4   2 2171.66 55.6244   1
   0   4  -2 2073.07 53.6159  10
   0  -4   2 2151.30 54.3581   7
   0   4  -2 2160.85 54.4456   4
   0  -4  -2 2198.19 54.5157   9
   0  -4   2 2181.72 55.6229   2
   0   4   2 2219.25 55.7488   8
   0   4  -2 2146.66 54.1208   7
   0  -4  -2 2261.31 56.4875   8
   0  -4  -2 2199.64 54.1981   9
   0   4  -2 2112.62 54.2880   7
   0   4  -2 2253.56 55.1225   9
   0  -4  -2 2135.17 55.3843   3
   0  -4  -2 2074.55 55.6702   8
   0   4  -2 2225.85 55.9632   8
   0   4  -2 2224.42 54.4538   2
   0  -4   2 2210.58 55.9680   8
   0   4   2 2093.04 55.3338   8
   0  -4   2 2164.73 55.6756   1
   0  -4   2 2218.04 55.1173   9
   0   4  -2 2217.49 55.7724   1
   0  -4   2 2179.82 54.7222   7
   0   4  -2 2133.85 53.8652   6
   1  -4   2 0.28200 0.50136   2
   1   4  -2 0.61902 0.46566   6
  -1  -4  -2 0.11828 0.47765   5
   1   4  -2 0.10541 0.29267   2
   1  -4   2 0.16889 0.37922  10
   1  -4   2 0.47446 0.49949   7
   1   4  -2 0.32153 0.53282   9
  -1  -4  -2 0.58924 0.67309   8
   1  -4   2 0.45702 0.49103   2
   1   4  -2 0.29580 0.79801   8
   1  -4   2 0.11814 0.69108   9
   1  -4   2 0.68541 0.55776   4
   1   4  -2 0.17995 0.25991   2
   1  -4   2 0.31038 0.48812   2
   1  -4   2 0.60462 0.92238   1
   1  -4   2 0.20258 0.72034   8
   1   4  -2 -0.0975 0.67596   1
  -1  -4  -2 0.15387 0.71186   8
   1   4  -2 -0.1048 0.44946   5
  -1   4   2 0.01573 0.65554   1
  -1  -4  -2 0.24563 0.59277   1
   1  -4  -2 0.15283 0.29425   2
   1  -4  -2 0.82990 0.37858   2
   1  -4  -2 0.40089 0.75384   1
   1  -4  -2 0.32831 0.30997   6
  -1  -4   2 0.14004 0.29731   7
  -1   4  -2 -0.2597 0.76647   1
  -1   4  -2 0.26746 0.71684   9
   1  -4  -2 0.68435 0.52998   9
  -1   4  -2 -0.0717 0.45744   2
   1   4   2 0.50453 0.55479   5
  -1  -4   2 -0.1046 0.32351  10
  -1  -4   2 0.14204 0.81303   8
  -1  -4   2 -0.0417 0.31067   2
  -1   4  -2 0.49547 0.54423   4
   1  -4  -2 1.21126 0.77635   3
  -1  -4   2 0.02022 0.23767  10
  -1  -4   2 0.02101 0.37115   2
  -1  -4   2 -0.3750 0.48706   9
  -1  -4   2 0.17238 0.25587   7
  -1  -4   2 0.60125 0.63196   9
  -1   4  -2 0.70396 0.38291   6
   1   4   2 0.52274 0.66311   1
  -1   4  -2 0.01929 0.33413  10
  -1   4  -2 0.20649 0.70508   8
  -1  -4   2 0.26226 0.67668   1
   1  -4  -2 -0.0192 0.48448   9
   1   4   2 0.44181 0.71564   8
  -1   4  -2 0.18974 0.37424   7
   2  -4   2 1472.51 38.0132   4
  -2   4   2 1542.99 36.4023  10
  -2   4   2 1426.96 38.9524   1
   2  -4   2 1479.43 37.4876   2
  -2  -4  -2 1471.02 37.8400   1
  -2   4   2 1422.71 38.3009   9
   2   4  -2 1489.43 37.9722   1
  -2  -4  -2 1488.27 36.9206   9
  -2  -4  -2 1493.47 37.7429   1
  -2   4   2 1445.70 37.1270   2
  -2  -4  -2 1449.19 36.5963   4
   2   4  -2 1534.84 37.8638   9
   2   4  -2 1466.52 36.4428   2
   2   4  -2 1376.15 39.5244   8
   2   4  -2 1435.44 37.6322   5
   2  -4   2 1484.15 38.7988   9
  -2  -4  -2 1439.94 37.7304   5
  -2  -4  -2 1479.89 36.8769   9
   2  -4   2 1452.88 38.7054   8
  -2  -4  -2 1475.51 39.4381   8
   2  -4   2 1438.87 36.8111  10
  -2   4   2 1479.92 36.5474   7
  -2  -4  -2 1483.07 39.7403   8
  -2  -4   2 1511.36 37.1200   2
  -2   4  -2 1460.16 39.0466   1
  -2  -4   2 1495.74 36.4090  10
  -2  -4   2 1472.17 38.0208   9
  -2  -4   2 1451.69 36.4925   7
   2   4   2 1468.45 39.4133   8
  -2   4  -2 1471.89 37.6799   2
  -2  -4   2 1483.76 39.9701   8
  -2   4  -2 1475.24 36.8705   5
  -2   4  -2 1462.52 37.9391   4
  -2   4  -2 1510.58 38.9257   8
  -2  -4   2 1334.80 36.5495   7
  -2   4  -2 1474.26 38.9963   9
  -2  -4   2 1488.60 36.9235   2
   2  -4  -2 1478.86 36.6744  10
  -2  -4   2 1526.93 37.7738   5
   2  -4  -2 1499.26 37.1810   2
   2  -4  -2 1464.85 37.2507   2
  -2   4  -2 1503.74 36.7878   6
  -2   4  -2 1449.63 36.9450   7
   2   4   2 1472.76 37.7385   1
  -2   4  -2 1504.38 36.9553  10
   2  -4  -2 1503.13 36.5805   6
   2  -4  -2 1483.95 38.2234   9
  -2  -4   2 1466.83 37.9276   1
  -2  -4   2 1498.00 38.3737   9
  -3  -4  -2 0.18409 0.52179   1
   3   4  -2 0.29052 0.71219   9
  -3   4   2 -0.0463 0.56496   8
  -3  -4  -2 -0.3144 1.06358   8
  -3  -4  -2 0.15499 0.52683   1
  -3   4   2 0.14611 0.93818   9
  -3  -4  -2 0.11891 0.63677   9
   3  -4   2 -0.0727 0.77699   8
   3   4  -2 -0.0445 0.61834   1
  -3  -4  -2 0.18150 0.61462   9
   3  -4   2 -0.1147 0.63561   2
  -3   4   2 -0.2029 0.45752  10
   3  -4   2 0.13292 1.04990   9
  -3   4   2 0.39450 0.64244   2
  -3  -4  -2 0.71942 0.78593   5
   3   4  -2 -0.0566 1.01038   8
   3   4  -2 0.11579 0.61730   5
   3  -4   2 -0.0380 0.56145   5
   3  -4   2 -0.4899 0.66982   4
  -3   4   2 0.42264 0.89083   1
   3  -4   2 0.52132 0.58606  10
  -3  -4  -2 -0.1643 0.89538   8
  -3   4   2 0.09841 0.54214   8
   3   4  -2 0.22399 0.36369   2
  -3  -4  -2 0.34825 0.53358   4
  -3   4   2 0.12273 0.50601   7
   3   4   2 0.11171 1.00440   8
  -3   4  -2 0.39941 0.85440   8
  -3  -4   2 0.00286 1.05461   8
  -3  -4   2 -0.1171 0.66839   5
  -3   4  -2 -0.1024 0.48966   5
  -3  -4   2 -0.3622 0.70637   9
  -3  -4   2 0.36990 0.42895  10
  -3   4  -2 0.10644 0.55516   7
  -3  -4   2 0.18448 0.54982   2
   3  -4  -2 0.17504 0.45567  10
   3  -4  -2 -0.0943 0.52569   8
  -3   4  -2 0.14961 0.50046  10
  -3   4  -2 0.00419 0.68999   2
  -3   4  -2 0.16421 0.71763   4
   3  -4  -2 -0.7003 0.84601   9
   3  -4  -2 -0.0608 0.57424   2
  -3   4  -2 1.13286 1.20963   9
  -3  -4   2 -0.0990 0.61539   1
   3   4   2 0.20021 0.68574   5
   3  -4  -2 -0.3935 0.70965   4
  -3  -4   2 0.49386 0.75643   9
  -3  -4   2 0.37410 0.44983   7
  -3   4  -2 -0.1977 0.92049   9
  -3  -4   2 0.05394 0.45914   2
   3  -4  -2 0.41963 0.57516   5
  -3   4  -2 -0.4387 0.85013   1
   3   4   2 0.21577 0.41135   4
  -4   4   2 2469.28 62.1932   7
  -4   4   2 2482.08 62.8793   2
  -4   4   2 2487.81 63.2263   8
  -4  -4  -2 2519.06 66.2780   8
   4   4  -2 2555.71 61.9283   1
  -4   4   2 2570.08 61.9886  10
   4   4  -2 2510.64 63.5509   5
   4  -4   2 2497.78 62.9677   2
   4  -4   2 2513.61 61.9481  10
  -4  -4  -2 2496.46 66.7868   8
   4   4  -2 2523.28 61.5427   2
   4  -4   2 2487.82 64.6207   8
  -4  -4  -2 2478.16 63.2548   9
  -4  -4  -2 2468.31 63.5170   5
  -4   4   2 2513.68 63.3785   8
  -4  -4  -2 2489.30 63.4119   9
   4  -4   2 2526.05 65.0648   9
  -4  -4  -2 2492.34 61.7528   2
   4   4  -2 2443.36 66.2934   8
  -4   4   2 2424.15 64.8591   9
   4  -4   2 2499.69 63.8361   4
  -4  -4  -2 2507.56 62.7775   4
  -4   4   2 2503.58 64.4741   1
   4  -4   2 2479.01 62.7472   5
  -4  -4  -2 2522.65 61.7682   2
  -4  -4  -2 2607.10 61.3962   1
   4   4   2 2554.23 62.1950   4
  -4  -4   2 2430.34 61.9026   1
   4  -4  -2 2467.67 63.0947   8
   4  -4  -2 2485.32 62.7103   5
  -4   4  -2 2506.02 62.6085   5
  -4   4  -2 2433.02 64.2825   1
  -4  -4   2 2148.48 61.5759  10
   4  -4  -2 2517.84 61.9573  10
  -4  -4   2 2420.61 62.3318   2
  -4  -4   2 2453.96 66.5045   8
  -4  -4   2 2462.80 63.5550   5
  -4   4  -2 2419.66 65.2153   9
  -4   4  -2 2451.66 63.1779   2
  -4  -4   2 2443.59 65.7470   8
  -4  -4   2 2453.35 62.5430   2
  -4   4  -2 2532.66 63.8577   4
  -4  -4   2 2455.59 64.1768   9
  -4   4  -2 2430.88 64.8419   8
  -4  -4   2 2444.95 61.7906   7
   4  -4  -2 2432.42 63.6536   4
   4  -4  -2 2552.25 64.7554   9
   4   4   2 2503.52 66.2757   8
  -4   4  -2 2446.49 62.2294   7
   4  -4  -2 2483.65 62.8823   2
  -4   4  -2 2515.60 62.1852  10
   4   4   2 2480.90 63.6838   5
  -5  -4  -2 -0.0424 0.97824   9
  -5   4   2 0.07642 0.85201   2
   5  -4   2 1.03482 1.17063   4
  -5   4   2 0.11216 0.71858  10
  -5   4   2 -0.8552 0.67907   7
  -5   4   2 0.92149 1.47021   9
   5   4  -2 -0.3604 0.81583   4
  -5  -4  -2 -0.1063 0.70599   2
   5   4  -2 0.23324 0.59694   9
   5  -4   2 0.10817 1.14938   8
  -5  -4  -2 -0.0292 0.65597   2
   5  -4   2 0.47942 0.90136   2
  -5   4   2 -0.1277 0.96489   8
  -5  -4  -2 0.33552 1.45880   8
   5  -4   2 0.26146 0.93232   5
  -5   4   2 -0.3669 1.02418   1
  -5  -4  -2 -0.2107 0.61120   7
  -5  -4  -2 0.11588 0.97737   9
   5  -4   2 0.23327 1.25772   9
   5   4  -2 0.00465 0.56486   2
  -5  -4  -2 0.22656 0.47812  10
   5  -4   2 -0.0424 0.68031  10
  -5  -4  -2 0.02762 1.04335   5
  -5   4   2 0.14712 0.99894   8
  -5  -4   2 0.01789 1.09469   9
  -5   4  -2 0.12650 1.12261   1
  -5  -4   2 0.26954 1.00816   5
   5  -4  -2 0.52948 1.38297   9
  -5  -4   2 0.53095 0.68114  10
  -5   4  -2 0.37009 0.82716   7
  -5  -4   2 0.48971 1.46099   8
  -5  -4   2 -0.1568 0.67918   7
  -5   4  -2 0.08945 0.68793  10
   5  -4  -2 -0.0372 0.66514  10
  -5   4  -2 0.20430 0.81743   5
  -5   4  -2 0.76100 1.22841   8
  -5   4  -2 -0.5239 0.81705   2
   5   4   2 -0.3081 1.24625   8
  -5   4  -2 0.31028 1.34242   9
   5  -4  -2 -0.0545 1.05623   4
   5  -4  -2 0.33904 0.88899   2
   5  -4  -2 0.76323 0.93966   5
  -5   4  -2 0.80702 1.12968   4
  -5  -4   2 0.08295 0.77938   2
   5   4   2 -0.6105 0.69171   4
   6  -4   2 974.823 29.4295   9
  -6   4   2 980.807 26.9301   2
  -6  -4  -2 965.609 25.8821   2
  -6   4   2 958.793 29.5505   9
   6  -4   2 958.788 27.8193   4
  -6   4   2 964.648 28.0518   8
   6  -4   2 934.935 25.1046  10
   6  -4   2 964.214 28.9599   8
  -6   4   2 985.153 27.8802   1
  -6  -4  -2 943.250 31.2177   9
  -6  -4  -2 983.467 27.6663   5
   6  -4   2 989.747 26.6810   2
  -6  -4  -2 945.680 31.1464   8
  -6   4   2 988.454 28.3543   8
  -6  -4  -2 939.202 25.1099   7
  -6   4   2 961.201 25.5835  10
  -6  -4  -2 979.130 28.3698   9
   6  -4   2 927.292 26.7797   5
  -6  -4  -2 966.504 25.9629   2
  -6  -4  -2 929.974 24.8361  10
  -6   4   2 969.007 25.9178   7
  -6   4   2 981.959 26.9534   5
  -6  -4   2 944.667 27.5876   5
  -6   4  -2 963.706 27.6881   1
  -6   4  -2 938.443 25.8147   7
  -6   4  -2 938.276 26.9942   2
  -6  -4   2 953.544 25.5088   7
   6  -4  -2 972.418 25.3742  10
   6  -4  -2 964.288 29.1551   9
  -6  -4   2 948.333 26.4106   2
  -6  -4   2 937.586 25.3647  10
   6   4   2 933.656 30.4562   8
  -6   4  -2 930.304 27.7371   4
  -6   4  -2 977.057 26.7075   5
   6  -4  -2 955.427 27.8303   4
   6  -4  -2 977.137 27.9940   5
  -6   4  -2 953.135 29.8686   9
  -6   4  -2 987.233 25.7721  10
  -6  -4   2 966.524 28.5882   9
   6  -4  -2 988.601 26.7486   2
  -6  -4   2 962.257 31.1829   8
  -7   4   2 -1.0075 1.61946   9
  -7   4   2 0.37387 1.19484   2
  -7   4   2 0.67743 0.99011  10
  -7  -4  -2 0.00863 0.83504  10
  -7  -4  -2 0.00752 1.40189   5
  -7   4   2 1.10811 1.14747   7
   7  -4   2 1.01864 1.61660   8
  -7   4   2 0.69653 1.50724   8
  -7   4   2 1.04525 1.30555   5
  -7   4   2 0.67325 1.79844   8
  -7  -4  -2 -0.0551 0.92899   2
  -7   4   2 0.13826 1.32217   1
  -7  -4  -2 0.55080 1.46027   9
  -7  -4  -2 0.42866 2.02621   8
   7  -4   2 0.57619 0.84286  10
  -7  -4  -2 0.44346 1.03032   7
  -7  -4   2 0.45026 1.31564   5
  -7   4  -2 0.67707 1.90848   9
  -7  -4   2 0.09812 1.01881   2
  -7   4  -2 0.27871 1.56307   8
  -7   4  -2 1.33755 1.32414   5
  -7  -4   2 1.43561 1.65349   9
  -7   4  -2 0.78709 1.03761   7
  -7   4  -2 0.30591 1.39141   1
   7  -4  -2 0.13946 1.72068   9
  -7   4  -2 0.73073 1.36901   2
  -7  -4   2 -0.4644 0.94348   7
  -7   4  -2 0.03711 0.92563  10
   7  -4  -2 0.23372 1.41216   1
   7   4   2 -0.5011 1.86413   8
  -7  -4   2 1.29957 1.04274  10
   7  -4  -2 -0.4640 0.91341  10
   7  -4  -2 1.26104 1.26861   2
  -7  -4   2 0.01732 1.94905   8
  -8   4   2 42.9046 3.94613   2
  -8   4   2 38.7675 3.28477   7
  -8  -4  -2 41.1045 6.00034   8
  -8  -4  -2 39.9312 3.06605   7
  -8  -4  -2 34.6999 3.98507   5
  -8   4   2 35.8414 5.16930   9
  -8   4   2 39.3016 3.07452  10
   8  -4   2 42.9042 4.98117   8
  -8  -4  -2 35.3654 4.64998   9
  -8  -4  -2 36.2222 2.82463  10
  -8  -4  -2 39.0108 3.47122   2
  -8   4   2 37.2358 4.73020   8
  -8  -4   2 45.8447 4.51100   5
  -8  -4   2 46.8227 5.17059   9
  -8   4  -2 52.2791 6.06131   9
  -8   4  -2 49.1784 5.54343   8
  -8   4  -2 52.8733 3.60147   7
  -8  -4   2 40.9602 5.81192   8
  -8  -4   2 49.7530 3.30583  10
  -8   4  -2 49.5562 3.38988  10
  -8   4  -2 48.1020 4.23277   2
  -8   4  -2 52.8605 4.17801   5
  -8  -4   2 46.8337 3.33486   7
  -8  -4   2 49.3628 3.91815   2
   8  -4  -2 45.3166 2.89391  10
  -9  -4  -2 -1.9118 1.32447   2
  -9  -4  -2 0.45599 1.43686   7
  -9  -4  -2 -0.7457 2.50776   8
  -9  -4  -2 -0.2981 1.23738  10
  -9   4   2 -0.4080 1.34609  10
  -9   4   2 0.94258 1.52012   7
   9  -4   2 0.03933 2.09551   8
  -9   4   2 0.39969 1.74550   2
  -9  -4  -2 -0.9378 2.04237   9
  -9  -4   2 0.39286 1.50970   2
  -9   4  -2 -0.2721 1.31749   7
  -9   4  -2 0.07773 1.69624   5
  -9   4  -2 0.69396 2.37076   8
  -9   4  -2 1.00405 1.79777   2
  -9  -4   2 -0.1882 2.49535   8
  -9  -4   2 0.45059 1.39796   7
  -9   4  -2 0.80562 2.80959   9
  -9  -4   2 -0.0956 1.27672  10
  -9   4  -2 0.04551 1.20981  10
  -9  -4   2 0.44592 2.18734   9
 -10   4   2 218.139 9.24063   7
 -10  -4  -2 232.934 10.1966   2
 -10   4   2 223.013 8.87930  10
 -10  -4  -2 233.242 9.08732   7
 -10  -4  -2 230.968 8.80427  10
 -10  -4  -2 228.340 12.9015   9
 -10   4  -2 209.634 8.80835  10
 -10  -4   2 233.914 9.33993   7
 -10  -4   2 226.131 16.1502   8
 -10  -4   2 229.716 10.2100   2
 -10  -4   2 235.247 9.02803  10
 -10   4  -2 230.025 10.8055   2
 -10   4  -2 230.552 9.30069   7
 -10  -4   2 231.547 12.9309   9
 -11  -4  -2 1.19060 1.67903  10
 -11  -4  -2 1.55241 1.81273   7
 -11   4   2 -2.5076 1.46881   7
 -11  -4  -2 -0.6917 1.80522   2
 -11   4   2 -0.6825 1.38077  10
 -11  -4  -2 -0.0668 2.71888   9
 -11   4  -2 0.95084 1.66376   7
 -11  -4   2 1.08526 1.99383   2
 -11   4  -2 -1.2549 1.34600  10
 -11  -4   2 -0.2439 2.55948   9
 -11  -4   2 -0.6639 1.51021  10
 -11  -4   2 0.82139 1.85748   7
   0  -5   2 22.5090 1.95140   9
   0  -5  -2 25.5302 2.06229   3
   0  -5   2 20.4049 1.04475   7
   0   5   2 25.9023 2.28422   1
   0  -5  -2 23.2232 1.08239   9
   0  -5   2 18.9356 2.16037   8
   0  -5  -2 22.8945 1.22033   9
   0   5  -2 22.6004 1.10007   2
   0   5  -2 20.4072 2.15900   8
   0   5  -2 20.5093 1.18130   6
   0  -5   2 17.0273 1.18820   2
   0  -5   2 20.8259 1.57133   4
   0  -5  -2 25.1961 1.38415   5
   0  -5   2 15.9221 1.70326   9
   0  -5   2 18.3314 0.99159   7
   0  -5  -2 27.2076 1.86024   8
   0   5  -2 14.7923 1.95200   1
   0  -5   2 21.7707 1.31974   2
   0  -5   2 20.7926 0.91771  10
   0   5  -2 21.3903 1.11469   5
   1   5  -2 1247.36 32.0028   5
  -1  -5  -2 1253.42 33.3122   1
  -1  -5  -2 1214.91 33.6797   8
  -1  -5  -2 1231.15 32.1577   5
   1  -5   2 1262.69 33.7205   8
  -1  -5  -2 1210.84 33.3984   8
   1  -5   2 1301.80 33.3314   9
   1  -5   2 1308.91 32.0929   2
   1  -5   2 1272.04 31.4626  10
   1  -5   2 1258.88 32.5880   4
  -1   5   2 1213.92 31.6235   8
   1   5  -2 1336.78 33.6488   1
  -1   5   2 1238.26 33.9779   1
   1  -5   2 1247.97 32.2599   2
   1   5  -2 1267.76 34.3450   8
  -1   5  -2 1242.28 32.0333   2
  -1  -5   2 1201.56 34.2635   8
   1  -5  -2 1275.27 31.7061   8
   1   5   2 1227.13 33.4562   8
  -1  -5   2 1286.98 33.0324   9
   1  -5  -2 1221.27 32.4984   9
   1   5   2 1249.68 33.3324   1
   1  -5  -2 1287.59 33.7753   3
  -1  -5   2 1254.41 32.8375   9
  -1  -5   2 1246.43 31.5744   2
  -1  -5   2 1251.17 31.0902   7
   1   5   2 1164.43 33.5304   8
  -1   5  -2 1234.38 31.5115   7
  -1  -5   2 1275.16 32.0665   5
   1  -5  -2 1276.03 32.3418   9
  -1   5  -2 1301.05 31.3580  10
  -1   5  -2 1277.61 31.3860   6
  -1   5  -2 1294.94 33.5090   9
  -1  -5   2 1309.02 33.5596   1
   1   5   2 1252.47 32.2515   5
   1  -5  -2 1251.69 31.5818   8
  -1   5  -2 1200.50 33.5680   8
   1  -5  -2 1262.89 31.3062   2
  -1  -5   2 1320.24 31.6883   2
  -1  -5   2 1314.26 31.1168   7
  -1   5  -2 1263.94 31.3713   7
  -1   5  -2 1306.74 34.1832   1
  -1   5  -2 1277.37 31.3497  10
  -1   5  -2 1241.25 32.4318   4
   1  -5  -2 1270.02 31.2262   6
   1  -5  -2 1244.90 31.3808   2
   2  -5   2 101.233 4.28529   4
   2  -5   2 81.6299 3.67803   2
   2  -5   2 109.005 4.86257   8
  -2  -5  -2 109.204 3.02727   4
   2   5  -2 110.663 5.65148   8
  -2  -5  -2 84.3387 3.10816   9
   2  -5   2 95.1991 3.31819  10
  -2   5   2 110.797 3.53725   2
  -2  -5  -2 94.3207 4.18974   1
  -2  -5  -2 87.8318 3.21514   9
   2   5  -2 97.4453 3.93813   5
  -2  -5  -2 107.459 4.12685   5
  -2  -5   2 94.1366 4.28520   1
   2  -5  -2 93.9084 4.31840   9
  -2  -5   2 100.528 2.71627  10
  -2   5  -2 109.851 3.22910   6
   2  -5  -2 106.050 2.98606   6
   2  -5  -2 107.095 3.16828  10
  -2  -5   2 88.2733 2.89691   7
  -2   5  -2 90.6116 3.30448   7
  -2  -5   2 95.4590 2.86418   7
   2  -5  -2 111.957 4.16087   4
  -2   5  -2 106.543 4.28066   4
  -2   5  -2 112.191 4.11918   2
  -2  -5   2 106.120 3.36524   2
  -2   5  -2 109.785 4.11778   2
  -2  -5   2 98.0954 3.98208   5
  -2   5  -2 104.589 4.90168   8
  -2  -5   2 90.6339 3.39168   2
  -2   5  -2 95.7313 3.35756  10
   2  -5  -2 111.677 3.80211   2
  -2  -5   2 86.3012 4.27601   9
  -2   5  -2 110.693 5.14613   9
   2  -5  -2 101.664 3.58386   2
  -2   5  -2 107.835 3.24342   5
  -2  -5   2 100.391 5.55557   8
  -3  -5  -2 1456.57 42.9695   8
  -3  -5  -2 1548.31 40.0083   1
   3  -5   2 1562.73 39.2852  10
  -3   5   2 1509.93 41.4603   9
   3   5  -2 1573.79 40.1919   1
  -3  -5  -2 1568.43 39.8810   9
   3   5  -2 1476.91 42.8628   8
   3  -5   2 1593.49 40.2053   2
   3  -5   2 1545.01 39.4998   5
   3  -5   2 1560.80 41.4425   8
  -3   5   2 1565.63 39.1287   7
   3   5  -2 1527.95 40.4486   5
  -3   5   2 1537.02 39.3816   8
  -3   5   2 1528.45 41.9421   1
  -3  -5  -2 1546.71 42.7999   8
  -3  -5  -2 1554.83 40.5482   5
   3  -5   2 1543.51 41.8625   9
  -3   5   2 1584.65 39.9310   2
  -3  -5  -2 1563.22 39.4028   4
  -3   5   2 1604.45 38.9575  10
  -3   5   2 1526.44 39.4150   8
  -3  -5  -2 1640.08 39.9992   1
  -3  -5  -2 1620.75 39.8440   9
   3  -5   2 1555.11 40.8501   4
  -3   5  -2 1530.58 39.3336   5
  -3  -5   2 1595.20 39.6309   2
   3   5   2 1518.35 40.5921   5
   3   5   2 1461.58 42.5200   8
  -3   5  -2 1564.76 40.7389   4
   3  -5  -2 1552.62 39.1582  10
  -3   5  -2 1614.99 39.4294  10
  -3  -5   2 1585.24 41.1773   9
   3  -5  -2 1548.08 40.6592   4
  -3  -5   2 1563.53 39.3381   2
   3  -5  -2 1532.83 39.2738   8
  -3   5  -2 1583.31 40.4202   2
   3  -5  -2 1568.87 41.3687   9
   3  -5  -2 1581.68 39.5286   5
   3   5   2 1519.41 39.8484   1
  -3  -5   2 1625.65 40.2006   1
  -3   5  -2 1522.49 42.0130   9
   3  -5  -2 1574.30 39.9051   2
  -3   5  -2 1564.74 39.4146   7
  -3  -5   2 1537.35 40.7888   9
  -3   5  -2 1593.48 42.1741   1
  -3  -5   2 1573.30 38.7002  10
  -3  -5   2 1551.30 38.8017   7
  -3  -5   2 1587.48 40.5592   5
  -3   5  -2 1543.32 41.6392   8
  -3  -5   2 1616.00 43.6247   8
  -4   5   2 178.931 6.10183   8
  -4   5   2 141.783 4.95952  10
  -4   5   2 175.253 7.49006   1
   4  -5   2 125.976 5.68255   2
  -4   5   2 181.832 7.67605   9
  -4  -5  -2 142.457 4.64607   2
   4   5  -2 160.201 6.38222   5
  -4   5   2 157.515 5.89868   2
   4  -5   2 163.274 5.67256   5
   4   5  -2 166.420 9.41686   8
   4  -5   2 153.467 6.54196   4
  -4  -5  -2 143.187 5.87137   9
  -4  -5  -2 168.807 5.72671   4
  -4   5   2 150.557 5.19081   7
  -4  -5  -2 156.267 6.35178   5
  -4  -5   2 141.864 6.17175   5
  -4   5  -2 179.783 7.96684   9
  -4  -5   2 170.448 5.47058   1
  -4  -5   2 145.972 4.72606  10
   4   5   2 150.864 4.93143   4
   4   5   2 164.387 6.53549   5
  -4  -5   2 142.315 5.26199   2
  -4  -5   2 142.590 4.79622   7
  -4  -5   2 137.507 5.40367   2
  -4  -5   2 159.792 8.42044   8
   4  -5  -2 160.941 6.52323   4
  -4   5  -2 184.375 8.11674   9
   4  -5  -2 151.194 5.52704   5
   4  -5  -2 146.232 5.03870  10
  -4   5  -2 164.488 7.27858   8
  -4   5  -2 151.813 6.13124   2
   4  -5  -2 125.515 5.53832   2
  -4   5  -2 152.930 5.46026   5
  -4   5  -2 135.328 5.17412   7
  -4  -5   2 156.357 6.76746   9
   5  -5   2 513.306 17.1639   9
  -5  -5  -2 490.608 15.5038   9
   5  -5   2 489.740 15.7714   4
   5  -5   2 491.699 14.8779   2
  -5  -5  -2 489.199 13.7155   2
  -5   5   2 474.330 16.2073   1
  -5   5   2 472.935 13.9568   7
  -5   5   2 492.755 14.9002   2
  -5   5   2 458.417 16.6670   9
   5  -5   2 492.349 13.7339  10
   5   5  -2 474.869 14.6881   4
  -5  -5  -2 468.288 12.8509   7
  -5   5   2 498.376 15.3789   8
  -5  -5  -2 492.351 15.3214   9
  -5  -5  -2 496.897 13.7905   2
  -5  -5  -2 468.007 12.5507  10
  -5   5   2 492.401 13.7863  10
  -5  -5  -2 491.857 15.5014   5
  -5   5   2 466.965 15.1580   8
  -5  -5  -2 481.719 18.4079   8
   5  -5   2 482.846 14.5986   5
   5  -5   2 481.215 16.3252   8
  -5  -5   2 510.312 13.5068  10
  -5  -5   2 506.388 14.2851   2
   5  -5  -2 502.034 14.5869   5
  -5   5  -2 502.681 16.8213   8
   5   5   2 490.766 18.0039   8
   5  -5  -2 503.596 16.8023   9
  -5   5  -2 493.465 16.3283   1
   5  -5  -2 516.208 14.9071   2
   5  -5  -2 491.969 15.7652   4
  -5   5  -2 507.166 14.5125   5
  -5   5  -2 503.948 14.1198   7
  -5  -5   2 490.774 16.1473   9
   5   5   2 516.392 14.0221   4
  -5   5  -2 507.974 17.4925   9
  -5  -5   2 508.730 14.5163   2
  -5  -5   2 503.595 13.6374   7
  -5   5  -2 504.825 14.0360  10
   5  -5  -2 498.618 15.1206   8
  -5   5  -2 501.846 17.4437   9
   5  -5  -2 496.348 13.7329  10
  -5  -5   2 492.783 15.5175   5
  -5   5  -2 506.330 15.2804   2
  -5  -5   2 495.270 18.5130   8
  -5   5  -2 507.152 15.8029   4
  -6  -5  -2 12.5471 1.82531   2
   6  -5   2 8.72284 1.89124   2
  -6  -5  -2 10.6190 1.49317   7
   6  -5   2 11.2580 1.54149  10
  -6   5   2 14.0281 2.28372   2
  -6   5   2 13.5348 1.87581   7
  -6   5   2 14.6321 2.61757   8
  -6  -5  -2 9.87543 1.60208   2
   6  -5   2 10.4476 2.37154   4
  -6  -5  -2 10.9412 2.17576   5
   6  -5   2 15.9000 2.35912   5
  -6   5   2 13.2298 2.59478   1
   6  -5   2 17.4979 3.18979   8
  -6  -5  -2 12.0163 1.32422  10
  -6   5   2 10.3770 1.58382  10
  -6  -5  -2 14.3848 2.71198   9
  -6   5   2 13.0368 3.12886   9
   6  -5   2 6.41399 2.34387   9
  -6  -5  -2 15.7525 3.94260   8
  -6   5   2 15.4500 2.69599   8
  -6   5  -2 14.7905 2.40820   2
   6  -5  -2 16.8958 2.82943   4
  -6   5  -2 11.0190 3.02878   9
  -6   5  -2 15.1501 3.11627   8
  -6   5  -2 12.6392 1.77932  10
  -6   5  -2 9.66821 1.64818   7
  -6  -5   2 12.3090 1.66482   7
  -6  -5   2 9.59187 2.14994   5
  -6   5  -2 15.0620 2.21842   5
  -6  -5   2 21.1228 3.52456   9
  -6   5  -2 8.76992 2.24868   1
   6   5   2 13.4015 3.41076   8
   6  -5  -2 9.77529 2.77732   9
   6  -5  -2 11.4346 1.62551  10
   6  -5  -2 9.51053 1.96726   2
  -6  -5   2 10.8940 1.90886   2
   6  -5  -2 15.2565 2.32337   5
  -6  -5   2 11.6770 1.56193  10
  -6   5  -2 12.3820 2.39275   4
  -6  -5   2 17.9503 4.14967   8
  -7  -5  -2 767.783 25.0210   9
  -7  -5  -2 821.899 21.7159   7
   7  -5   2 814.943 23.3181   2
  -7   5   2 793.435 24.9461   8
  -7   5   2 796.569 22.0406  10
  -7   5   2 754.996 26.2898   9
  -7  -5  -2 808.590 22.6649   2
   7  -5   2 765.979 25.3987   8
  -7  -5  -2 749.687 28.1081   8
  -7   5   2 779.221 24.5163   1
  -7   5   2 803.889 22.4085   7
   7  -5   2 826.810 21.6370  10
  -7   5   2 799.733 23.5988   2
  -7  -5  -2 779.445 21.4075  10
  -7  -5  -2 815.807 24.4536   5
[truncated: 2,668,320 more chars]
