# Supplementary material for: Synthesis and characterization of crystalline niobium and tantalum carbonyl complexes at room temperature
Source: Springer Nature journal article supplement (doi:10.1038/s41557-020-0487-3), 2020-06-22
Supplement: 41557_2020_487_MOESM18_ESM.mol [file 41557_2020_487_MOESM18_ESM.mol]

nchem.19071427C-comp4.mol
  ChemDraw04212015452D

 74 64  0  0  0  0  0  0  0  0999 V2000
   -5.1479   -0.0661    0.0000 Nb  0  3  0  0  0  0  0  0  0  0  0  0
    1.6926    2.2871    0.0000 C   0  0  0  0  0  0  0  0  0  0  0  0
    0.2698    1.4515    0.0000 F   0  0  0  0  0  0  0  0  0  0  0  0
    0.9812    1.8693    0.0000 C   0  0  0  0  0  0  0  0  0  0  0  0
    0.9873    1.0443    0.0000 F   0  0  0  0  0  0  0  0  0  0  0  0
    0.2637    2.2765    0.0000 F   0  0  0  0  0  0  0  0  0  0  0  0
    3.1215    2.2977    0.0000 F   0  0  0  0  0  0  0  0  0  0  0  0
    2.4101    1.8799    0.0000 C   0  0  0  0  0  0  0  0  0  0  0  0
    2.4162    1.0549    0.0000 F   0  0  0  0  0  0  0  0  0  0  0  0
    3.1276    1.4727    0.0000 F   0  0  0  0  0  0  0  0  0  0  0  0
    0.9744    3.3755    0.0000 F   0  0  0  0  0  0  0  0  0  0  0  0
    1.6919    2.9683    0.0000 C   0  0  0  0  0  0  0  0  0  0  0  0
    2.4033    3.3861    0.0000 F   0  0  0  0  0  0  0  0  0  0  0  0
    1.6911    3.7933    0.0000 F   0  0  0  0  0  0  0  0  0  0  0  0
    1.6938    1.0623    0.0000 O   0  5  0  0  0  0  0  0  0  0  0  0
    1.4568   -0.0253    0.0000 Al  0  1  0  0  0  0  0  0  0  0  0  0
   -1.5711    0.0050    0.0000 C   0  0  0  0  0  0  0  0  0  0  0  0
   -0.7485   -1.4253    0.0000 F   0  0  0  0  0  0  0  0  0  0  0  0
   -1.1598   -0.7102    0.0000 C   0  0  0  0  0  0  0  0  0  0  0  0
   -0.3348   -0.7115    0.0000 F   0  0  0  0  0  0  0  0  0  0  0  0
   -1.5735   -1.4239    0.0000 F   0  0  0  0  0  0  0  0  0  0  0  0
   -1.5687    1.4339    0.0000 F   0  0  0  0  0  0  0  0  0  0  0  0
   -1.1574    0.7188    0.0000 C   0  0  0  0  0  0  0  0  0  0  0  0
   -0.3324    0.7174    0.0000 F   0  0  0  0  0  0  0  0  0  0  0  0
   -0.7437    1.4326    0.0000 F   0  0  0  0  0  0  0  0  0  0  0  0
   -2.6661   -0.7074    0.0000 F   0  0  0  0  0  0  0  0  0  0  0  0
   -2.2524    0.0064    0.0000 C   0  0  0  0  0  0  0  0  0  0  0  0
   -2.6637    0.7216    0.0000 F   0  0  0  0  0  0  0  0  0  0  0  0
   -3.0774    0.0078    0.0000 F   0  0  0  0  0  0  0  0  0  0  0  0
   -0.3464    0.0050    0.0000 O   0  5  0  0  0  0  0  0  0  0  0  0
    1.6909   -2.2870    0.0000 C   0  0  0  0  0  0  0  0  0  0  0  0
    3.1158   -1.4552    0.0000 F   0  0  0  0  0  0  0  0  0  0  0  0
    2.4034   -1.8711    0.0000 C   0  0  0  0  0  0  0  0  0  0  0  0
    2.3994   -1.0461    0.0000 F   0  0  0  0  0  0  0  0  0  0  0  0
    3.1198   -2.2802    0.0000 F   0  0  0  0  0  0  0  0  0  0  0  0
    0.2619   -2.2939    0.0000 F   0  0  0  0  0  0  0  0  0  0  0  0
    0.9744   -1.8780    0.0000 C   0  0  0  0  0  0  0  0  0  0  0  0
    0.9705   -1.0530    0.0000 F   0  0  0  0  0  0  0  0  0  0  0  0
    0.2580   -1.4689    0.0000 F   0  0  0  0  0  0  0  0  0  0  0  0
    2.4112   -3.3774    0.0000 F   0  0  0  0  0  0  0  0  0  0  0  0
    1.6948   -2.9683    0.0000 C   0  0  0  0  0  0  0  0  0  0  0  0
    0.9823   -3.3842    0.0000 F   0  0  0  0  0  0  0  0  0  0  0  0
    1.6988   -3.7933    0.0000 F   0  0  0  0  0  0  0  0  0  0  0  0
    1.6952   -1.0336    0.0000 O   0  5  0  0  0  0  0  0  0  0  0  0
    4.9334    0.0122    0.0000 C   0  0  0  0  0  0  0  0  0  0  0  0
    4.1141    1.4444    0.0000 F   0  0  0  0  0  0  0  0  0  0  0  0
    4.5238    0.7283    0.0000 C   0  0  0  0  0  0  0  0  0  0  0  0
    3.6988    0.7316    0.0000 F   0  0  0  0  0  0  0  0  0  0  0  0
    4.9391    1.4411    0.0000 F   0  0  0  0  0  0  0  0  0  0  0  0
    4.9277   -1.4168    0.0000 F   0  0  0  0  0  0  0  0  0  0  0  0
    4.5180   -0.7006    0.0000 C   0  0  0  0  0  0  0  0  0  0  0  0
    3.6930   -0.6973    0.0000 F   0  0  0  0  0  0  0  0  0  0  0  0
    4.1027   -1.4135    0.0000 F   0  0  0  0  0  0  0  0  0  0  0  0
    6.0300    0.7253    0.0000 F   0  0  0  0  0  0  0  0  0  0  0  0
    5.6147    0.0124    0.0000 C   0  0  0  0  0  0  0  0  0  0  0  0
    6.0243   -0.7037    0.0000 F   0  0  0  0  0  0  0  0  0  0  0  0
    6.4396    0.0127    0.0000 F   0  0  0  0  0  0  0  0  0  0  0  0
    3.6800    0.0135    0.0000 O   0  5  0  0  0  0  0  0  0  0  0  0
   -3.2885    1.2444    0.0000 F   0  0  0  0  0  0  0  0  0  0  0  0
   -4.1163    1.2432    0.0000 C   0  0  0  0  0  0  0  0  0  0  0  0
   -4.5291    0.5257    0.0000 C   0  0  0  0  0  0  0  0  0  0  0  0
   -5.3569    0.5245    0.0000 C   0  0  0  0  0  0  0  0  0  0  0  0
   -5.7719    1.2408    0.0000 C   0  0  0  0  0  0  0  0  0  0  0  0
   -5.3590    1.9583    0.0000 C   0  0  0  0  0  0  0  0  0  0  0  0
   -4.5312    1.9595    0.0000 C   0  0  0  0  0  0  0  0  0  0  0  0
   -4.1184    2.6770    0.0000 F   0  0  0  0  0  0  0  0  0  0  0  0
   -5.6146   -0.6521    0.0000 C   0  5  0  0  0  0  0  0  0  0  0  0
   -6.4396   -0.6521    0.0000 O   0  3  0  0  0  0  0  0  0  0  0  0
   -4.6795   -1.1621    0.0000 C   0  5  0  0  0  0  0  0  0  0  0  0
   -4.3275   -1.9083    0.0000 O   0  3  0  0  0  0  0  0  0  0  0  0
   -4.4617   -0.6822    0.0000 C   0  5  0  0  0  0  0  0  0  0  0  0
   -3.6367   -0.6822    0.0000 O   0  3  0  0  0  0  0  0  0  0  0  0
   -5.3708   -1.1621    0.0000 C   0  5  0  0  0  0  0  0  0  0  0  0
   -5.7227   -1.9083    0.0000 O   0  3  0  0  0  0  0  0  0  0  0  0
  2  4  1  0      
  2  8  1  0      
  2 12  1  0      
  3  4  1  0      
  4  5  1  0      
  4  6  1  0      
  7  8  1  0      
  8  9  1  0      
  8 10  1  0      
 11 12  1  0      
 12 13  1  0      
 12 14  1  0      
  2 15  1  0      
 17 19  1  0      
 17 23  1  0      
 17 27  1  0      
 18 19  1  0      
 19 20  1  0      
 19 21  1  0      
 22 23  1  0      
 23 24  1  0      
 23 25  1  0      
 26 27  1  0      
 27 28  1  0      
 27 29  1  0      
 17 30  1  0      
 31 33  1  0      
 31 37  1  0      
 31 41  1  0      
 32 33  1  0      
 33 34  1  0      
 33 35  1  0      
 36 37  1  0      
 37 38  1  0      
 37 39  1  0      
 40 41  1  0      
 41 42  1  0      
 41 43  1  0      
 31 44  1  0      
 45 47  1  0      
 45 51  1  0      
 45 55  1  0      
 46 47  1  0      
 47 48  1  0      
 47 49  1  0      
 50 51  1  0      
 51 52  1  0      
 51 53  1  0      
 54 55  1  0      
 55 56  1  0      
 55 57  1  0      
 45 58  1  0      
 59 60  1  0      
 60 61  2  0      
 61 62  1  0      
 62 63  2  0      
 63 64  1  0      
 64 65  2  0      
 60 65  1  0      
 65 66  1  0      
 67 68  3  0      
 69 70  3  0      
 71 72  3  0      
 73 74  3  0      
M  CHG  8   1   1  15  -1  16   3  30  -1  44  -1  58  -1  67  -1  68   1
M  CHG  6  69  -1  70   1  71  -1  72   1  73  -1  74   1
M  END
